# Supplementary material for: FK506-Binding Protein 12.6/1b, a Negative Regulator of [Ca2+], Rescues Memory and Restores Genomic Regulation in the Hippocampus of Aging Rats
Source: J Neurosci. 2018 Jan 24;38(4):1030–41. doi: 10.1523/JNEUROSCI.2234-17.2017 (PMC5783960; doi:10.1523/JNEUROSCI.2234-17.2017)
Supplement: Figure 4-1 [file zns999170450so1.xlsx]

## Sheet: Aging up, Unchanged by FK
ID	Gene	Gene	Description	Supermean	#P	stable aging	Yng	Vect	Short	Long	Yng	Vect	Short	Long	Yng	Vect	Short	Long	Young	Aging Ctrl	Short FK	Long FK	ANOVA	MSE	LSD	Y v Age Ctrl	Y v Short	Y v Long	Age Ctrl v Short FK	Age Ctrl v Long FK	Short v Long	Combo	Pattern#
10858408	A2m	A2m	alpha-2-macroglobulin	715.148	24		501.848	853.635	569.798	749.747	40.1822	317.074	40.062	279.949	16.4043	129.445	16.3552	114.289	502±16	854±129	570±16	750±114	0.0390563	42636.7	306.452	1	0	0	0	0	0		100
10791478	Aadat	Aadat	aminoadipate aminotransferase	295.692	24	Up	239.683	287.082	322.322	303.568	16.3168	54.9491	21.7127	18.5968	6.66131	22.4329	8.86419	7.59212	240±7	287±22	322±9	304±8	0.00108073	920.801	45.0354	1	1	1	0	0	0		100
10876769	Abca1	Abca1	ATP-binding cassette, subfamily A (ABC1), member 1	680.069	24		560.263	682.706	643.183	674.431	13.2976	42.1305	34.8462	49.4871	5.42872	17.1997	14.2259	20.203	560±5	683±17	643±14	674±20	7.20325e-05	1384.22	55.2171	1	1	1	0	0	0		100
10748601	Abca8a	Abca8a	ATP-binding cassette, subfamily A (ABC1), member 8a	1218.15	24		1085.07	1204.53	1242.3	1215.8	46.4871	107.069	75.0196	47.5101	18.9783	43.7106	30.6266	19.3959	1085±19	1205±44	1242±31	1216±19	0.0056724	5057.15	105.542	1	1	1	0	0	0		100
10853347	Abcb4	Abcb4	ATP-binding cassette, subfamily B (MDR/TAP), member 4	207.173	24		175.494	221.913	212.502	199.389	6.4063	30.9169	13.2034	15.8811	2.61536	12.6218	5.39026	6.48344	175±3	222±13	213±5	199±6	0.0021804	324.28	26.7258	1	1	0	0	0	0		100
10758327	Abcb9	Abcb9	ATP-binding cassette, subfamily B (MDR/TAP), member 9	254.827	24		247.285	266.04	268.543	249.752	14.6697	16.3301	10.846	6.71825	5.98889	6.66674	4.42788	2.74272	247±6	266±7	269±4	250±3	0.0155986	155.608	18.5134	1	1	0	0	0	-1		100
10751018	Abhd10	Abhd10	abhydrolase domain containing 10	219.047	24		210.095	231.247	217.561	222.888	5.92746	13.8658	11.4665	11.6903	2.41988	5.66068	4.68118	4.77253	210±2	231±6	218±5	223±5	0.0319984	120.286	16.2771	1	0	0	0	0	0		100
10708053	Abhd2	Abhd2	abhydrolase domain containing 2	951.054	24		824.738	1114.11	878.834	981.56	28.1573	300.234	25.1967	155.678	11.4952	122.57	10.2865	63.5554	825±11	1114±123	879±10	982±64	0.0383273	25730.5	238.065	1	0	0	0	0	0		100
10731047	Ablim1	Ablim1	actin-binding LIM protein 1	934.118	24		876.082	962.778	953.334	940.22	26.7754	41.1403	36.4415	48.1172	10.931	16.7955	14.8772	19.6438	876±11	963±17	953±15	940±20	0.00504607	1503.73	57.5514	1	1	1	0	0	0		100
10736957	Acaca	Acaca	acetyl-CoA carboxylase alpha	580.87	24		564.55	595.785	592.762	575.634	15.8794	25.9771	11.1565	14.5935	6.48273	10.6051	4.5546	5.95778	565±6	596±11	593±5	576±6	0.020032	297.221	25.5865	1	1	0	0	0	0		100
10928602	Acadl	Acadl	acyl-CoA dehydrogenase, long chain	464.818	24	Up	422.095	467.154	473.858	466.346	20.3825	26.5525	14.7051	15.791	8.32113	10.84	6.00333	6.44663	422±8	467±11	474±6	466±6	0.000719377	380.282	28.9417	1	1	1	0	0	0		100
10764814	Acbd6	Acbd6	acyl-CoA binding domain containing 6	794.832	24		762.333	800.888	821.939	795.24	26.1969	24.6504	28.27	17.4237	10.6949	10.0635	11.5412	7.11319	762±11	801±10	822±12	795±7	0.00441541	598.729	36.315	1	1	0	0	0	0		100
10902112	Acss3	Acss3	acyl-CoA synthetase short-chain family member 3	168.571	24		147.42	185.822	168.436	180.182	7.02913	25.1158	10.845	18.9986	2.86963	10.2535	4.42746	7.75613	147±3	186±10	168±4	180±8	0.00447299	271.74	24.4651	1	0	1	0	0	0		100
10781207	Adra1a	Adra1a	adrenergic, alpha-1A-, receptor	231.704	24		218.035	249.776	243.48	228.158	8.50001	39.6799	8.19307	4.53871	3.47011	16.1993	3.34481	1.85292	218±3	250±16	243±3	228±2	0.0495185	373.572	28.6852	1	0	0	0	0	0		100
10774015	Aebp1	Aebp1	AE binding protein 1	314.858	24		277.985	321.745	307.161	323.99	12.2381	19.4862	29.3652	15.2173	4.99618	7.9552	11.9883	6.21242	278±5	322±8	307±12	324±6	0.00341355	407.216	29.9491	1	0	1	0	0	0		100
10791579	Aga	Aga	aspartylglucosaminidase	665.349	24		619.612	687.342	659.723	670.696	17.4431	71.3198	12.7445	29.8453	7.12112	29.1162	5.20292	12.1843	620±7	687±29	660±5	671±12	0.042753	1428.06	56.0847	1	0	0	0	0	0		100
10826335	Agl	Agl	amylo-alpha-1, 6-glucosidase, 4-alpha-glucanotransferase	380.885	24		362.223	393.501	393.7	379.662	16.0237	23.1032	23.5733	9.27394	6.54167	9.43184	9.62376	3.78607	362±7	394±9	394±10	380±4	0.0301179	348.809	27.7182	1	1	0	0	0	0		100
10811900	Agt	Agt	angiotensinogen (serpin peptidase inhibitor, clade A, member 8)	730.644	24		701.245	809.65	733.819	734.68	37.3182	100.526	24.2831	58.0215	15.2351	41.0398	9.91352	23.6872	701±15	810±41	734±10	735±24	0.0482739	3535.07	88.2409	1	0	0	0	0	0		100
10734148	Alkbh5	Alkbh5	alkB, alkylation repair homolog 5 (E. coli)	436.548	24		408.067	445.769	459.239	427.629	3.63148	38.4922	27.4772	15.2691	1.48255	15.7144	11.2175	6.23357	408±1	446±16	459±11	428±6	0.0170397	606.67	36.555	1	1	0	0	0	0		100
10906643	Amigo2	Amigo2	adhesion molecule with Ig like domain 2	273.113	24		260.549	289.528	285.673	264.349	12.5266	24.3545	13.9574	17.4483	5.11397	9.94269	5.69809	7.12323	261±5	290±10	286±6	264±7	0.0210313	297.548	25.6005	1	0	0	0	0	0		100
10867010	Amn1	Amn1	antagonist of mitotic exit network 1 homolog (S. cerevisiae)	252.354	24		235.703	258.44	273.846	245.966	11.2389	21.7508	11.8513	15.1283	4.58828	8.87971	4.83828	6.1761	236±5	258±9	274±5	246±6	0.00227916	230.029	22.5093	1	1	0	0	0	-1		100
10779835	Ang1	Ang1	angiogenin, ribonuclease A family, member 1	88.0803	24		80.3423	94.4124	93.0797	86.5257	9.15923	9.95635	5.58439	4.5228	3.73924	4.06466	2.27982	1.84642	80±4	94±4	93±2	87±2	0.0184311	56.5357	11.1592	1	1	0	0	0	0		100
10928084	Ankrd44	Ankrd44	ankyrin repeat domain 44	225.433	24		208.625	232.65	227.134	218.186	13.2559	11.9354	11.2811	8.5739	5.41169	4.87262	4.6055	3.50028	209±5	233±5	227±5	218±4	0.0115503	129.068	16.8609	1	1	0	0	0	0		100
10920770	Ano10	Ano10	anoctamin 10	282.694	24		268.624	292.487	294.71	278.925	15.557	11.6365	18.6594	14.1531	6.35113	4.75058	7.61768	5.77797	269±6	292±5	295±8	279±6	0.0304258	236.535	22.8254	1	1	0	0	0	0		100
10775628	Anxa3	Anxa3	annexin A3	558.027	24	Up	368.789	601.419	542.957	484.833	13.1016	211.12	74.3124	54.3533	5.34871	86.1894	30.3379	22.1897	369±5	601±86	543±30	485±22	0.0121815	11659.4	160.254	1	1	0	0	0	0		100
10863757	Anxa4	Anxa4	annexin A4	308.717	24		245.51	341.687	338.552	306.117	29.5818	89.1063	25.6884	21.6059	12.0767	36.3775	10.4873	8.82059	246±12	342±36	339±10	306±9	0.00823627	2198.35	69.5856	1	1	0	0	0	0		100
10822837	Anxa5	Anxa5	annexin A5	782.714	24		694.047	787.562	797.347	796.935	20.5627	48.468	46.8633	43.3712	8.3947	19.787	19.1319	17.7062	694±8	788±20	797±19	797±18	0.000674972	1678.78	60.809	1	1	1	0	0	0		100
10812532	Ap3b1	Ap3b1	adaptor-related protein complex 3, beta 1 subunit	567.913	24		518.672	589.49	578.368	566.385	38.3928	72.2577	18.7173	23.4057	15.6738	29.4991	7.64131	9.55532	519±16	589±29	578±8	566±10	0.0449837	1723.45	61.6127	1	0	0	0	0	0		100
10796770	Apbb1ip	Apbb1ip	amyloid beta (A4) precursor protein-binding, family B, member 1 interacting protein	233.362	24		177.409	236.655	222.993	211.16	10.5662	52.7373	20.7394	19.9015	4.31362	21.5299	8.4668	8.12477	177±4	237±22	223±8	211±8	0.016753	832.32	42.817	1	1	0	0	0	0		100
10865329	Apobec1	Apobec1	apolipoprotein B mRNA editing enzyme, catalytic polypeptide 1	166.824	24		125.144	180.899	147.847	148.926	12.9216	53.6706	12.9605	12.7318	5.27522	21.9109	5.29109	5.19772	125±5	181±22	148±5	149±5	0.0262668	737.228	40.2969	1	0	0	0	0	0		100
10719530	Apoe	Apoe	apolipoprotein E	8693.26	24	Up	8017.92	8791.09	8801.71	8846.76	165.76	287.713	213.14	131.653	67.6711	117.459	87.014	53.7473	8018±68	8791±117	8802±87	8847±54	1.605e-06	41173.9	301.149	1	1	1	0	0	0		100
10894560	Appl2	Appl2	adaptor protein, phosphotyrosine interaction, PH domain and leucine zipper containing 2	585.624	24		533.06	598.564	614.737	594.414	13.7678	31.496	30.7381	18.0259	5.62069	12.8582	12.5488	7.35904	533±6	599±13	615±13	594±7	7.91418e-05	592.871	36.1369	1	1	1	0	0	0		100
10918569	Aqp9	Aqp9	aquaporin 9	134.757	24		125.611	139.535	138.26	130.016	5.76881	5.20825	6.92967	10.8174	2.35511	2.12626	2.82903	4.41618	126±2	140±2	138±3	130±4	0.0167115	57.8989	11.2929	1	1	0	0	0	0		100
10836035	Arhgap15	Arhgap15	Rho GTPase activating protein 15	168.544	24		128.566	178.623	168.046	149.875	8.484	43.0149	11.3781	12.4381	3.46358	17.5608	4.6451	5.07783	129±3	179±18	168±5	150±5	0.00620081	483.256	32.6257	1	1	0	0	0	0		100
10737838	Arhgap23	Arhgap23	Rho GTPase activating protein 23	678.858	24		625.087	716.594	703.654	675.414	25.4477	47.394	35.8994	21.7766	10.389	19.3485	14.6559	8.89025	625±10	717±19	704±15	675±9	0.000873079	1107.24	49.3847	1	1	1	0	0	0		100
10749675	Arhgdia	Arhgdia	Rho GDP dissociation inhibitor (GDI) alpha	2034.89	24		1939.19	2040.54	2078.1	1991.78	34.8273	63.4168	57.1556	51.3997	14.2182	25.8898	23.3337	20.9838	1939±14	2041±26	2078±23	1992±21	0.00126851	2720.79	77.4137	1	1	0	0	0	-1		100
10866526	Arhgdib	Arhgdib	Rho, GDP dissociation inhibitor (GDI) beta	210.056	24		136.916	228.713	195.662	175.591	9.76112	74.9455	20.754	21.7839	3.98496	30.5964	8.47279	8.89325	137±4	229±31	196±8	176±9	0.00613761	1445.79	56.4318	1	1	0	0	0	0		100
10705071	Arhgef1	Arhgef1	Rho guanine nucleotide exchange factor (GEF) 1	293.959	24		271.166	309.52	292.69	290.485	12.536	7.58169	17.0928	11.5922	5.11781	3.09521	6.9781	4.73252	271±5	310±3	293±7	290±5	0.00104967	165.705	19.1047	1	1	1	0	0	0		100
10916598	Arhgef12	Arhgef12	Rho guanine nucleotide exchange factor (GEF) 12	1661.32	24		1590.81	1688.35	1677.69	1664.55	63.0875	49.8661	63.4825	19.6893	25.7554	20.3577	25.9166	8.03813	1591±26	1688±20	1678±26	1665±8	0.020525	2733.43	77.5934	1	1	0	0	0	0		100
10809278	Arl2bp	Arl2bp	ADP-ribosylation factor-like 2 binding protein	2299.54	24		2249.11	2341.3	2346.54	2292.76	35.677	52.8585	42.9628	15.7443	14.5651	21.5794	17.5395	6.4276	2249±15	2341±22	2347±18	2293±6	0.00100762	1474.15	56.9824	1	1	0	0	0	0		100
10735205	Arrb2	Arrb2	arrestin, beta 2	346.445	24		323.614	358.033	347.833	350.401	9.25781	24.5787	14.6654	24.1805	3.77949	10.0342	5.98712	9.87166	324±4	358±10	348±6	350±10	0.0348807	360.202	28.1672	1	0	0	0	0	0		100
10843308	Arrdc1	Arrdc1	arrestin domain containing 1	162.749	24		143.522	172.615	167.584	163.177	4.07397	22.1685	11.0206	9.55273	1.66319	9.05025	4.49913	3.89988	144±2	173±9	168±4	163±4	0.00593376	163.805	18.9948	1	1	1	0	0	0		100
10715875	As3mt	As3mt	arsenic (+3 oxidation state) methyltransferase	170.996	24		155.894	177.116	174.183	176.063	11.4642	19.62	9.66121	9.92863	4.68022	8.00984	3.94417	4.05335	156±5	177±8	174±4	176±4	0.034301	166.131	19.1292	1	0	1	0	0	0		100
10764918	Astn1	Astn1	astrotactin 1	1880.19	24		1848.79	1945.42	1917.41	1854.86	17.1733	107.948	33.8073	62.4217	7.01098	44.0697	13.8018	25.4836	1849±7	1945±44	1917±14	1855±25	0.0452349	3857	92.1713	1	0	0	0	0	0		100
10899248	Atf1	Atf1	activating transcription factor 1	394.376	24		354.521	415.27	404.23	384.024	24.6832	35.5274	33.0158	14.374	10.0769	14.504	13.4786	5.86814	355±10	415±15	404±13	384±6	0.00820078	767.282	41.1101	1	1	0	0	0	0		100
10907623	Atf7	Atf7	activating transcription factor 7	382.946	24		351.117	381.652	404.107	382.283	10.2833	14.612	13.6408	20.5264	4.19815	5.96534	5.56883	8.37988	351±4	382±6	404±6	382±8	0.000109856	232.621	22.6358	1	1	1	0	0	0		100
10820316	Atg10	Atg10	autophagy related 10	129.77	24		120.11	135.575	135.218	125.239	6.08664	13.4505	6.53834	10.087	2.48486	5.49116	2.66927	4.11798	120±2	136±5	135±3	125±4	0.0249772	85.8625	13.7522	1	1	0	0	0	0		100
10830646	Atg5	Atg5	autophagy related 5	306.331	24		286.43	307.117	315.603	305.863	17.9316	14.5624	10.7386	5.0741	7.32055	5.94508	4.38401	2.07149	286±7	307±6	316±4	306±2	0.00704155	166.384	19.1437	1	1	1	0	0	0		100
10865487	Atn1	Atn1	atrophin 1	948.845	24		931.039	993.338	953.81	949.561	34.0398	37.5539	20.3113	33.9444	13.8967	15.3313	8.29206	13.8577	931±14	993±15	954±8	950±14	0.0323291	1013.61	47.2505	1	0	0	0	0	0		100
10773636	Atp5e	Atp5e	ATP synthase, H+ transporting, mitochondrial F1 complex, epsilon subunit	1753.75	24		1687.97	1779.2	1795.31	1788.17	70.3292	43.8473	30.9686	60.6465	28.7118	17.9006	12.6429	24.7588	1688±29	1779±18	1795±13	1788±25	0.00903042	2926.66	80.2892	1	1	1	0	0	0		100
10907634	Atp5g2	Atp5g2	ATP synthase, H+ transporting, mitochondrial Fo complex, subunit C2 (subunit 9)	1597.3	24		1507.58	1648.61	1647.5	1577.87	77.7801	52.4462	95.977	50.2974	31.7536	21.4111	39.1824	20.5338	1508±32	1649±21	1648±39	1578±21	0.010324	5260.96	107.647	1	1	0	0	0	0		100
10869483	Atp6v1g1	Atp6v1g1	ATPase, H transporting, lysosomal V1 subunit G1	1577.64	24		1454.8	1607.65	1636.27	1578.88	92.5048	36.1321	24.8651	87.7493	37.7649	14.7509	10.1511	35.8235	1455±38	1608±15	1636±10	1579±36	0.00118096	4715.73	101.917	1	1	1	0	0	0		100
10891818	Atxn3	Atxn3	ataxin 3	264.73	24		250.134	271.681	269.511	261.877	13.3826	15.0228	4.91405	9.23127	5.46342	6.13304	2.00615	3.76865	250±5	272±6	270±2	262±4	0.0163121	123.423	16.488	1	1	0	0	0	0		100
10856559	Aup1	Aup1	ancient ubiquitous protein 1	785.122	24		755.267	802.623	801.684	773.214	20.035	40.7074	15.4674	26.8914	8.17927	16.6187	6.31453	10.9784	755±8	803±17	802±6	773±11	0.0173549	707.753	39.4831	1	1	0	0	0	0		100
10713731	B3gat3	B3gat3	beta-1,3-glucuronyltransferase 3 (glucuronosyltransferase I)	504.132	24		487.503	523.628	519.288	499.868	20.9398	17.5509	6.55236	22.2818	8.54865	7.16513	2.67499	9.09653	488±9	524±7	519±3	500±9	0.00974737	322.189	26.6395	1	1	0	0	0	0		100
10851952	B4galt5	B4galt5	UDP-Gal:betaGlcNAc beta 1,4-galactosyltransferase, polypeptide 5	500.702	24		454.435	507.954	527.289	497.701	18.5561	28.2078	19.6086	5.23055	7.57551	11.5158	8.00517	2.13537	454±8	508±12	527±8	498±2	2.50093e-05	366.508	28.4127	1	1	1	0	0	-1		100
10889965	Baz1a	Baz1a	bromodomain adjacent to zinc finger domain, 1A	91.2288	24		77.6886	92.152	86.9168	84.7762	6.11174	8.59907	3.48078	8.43495	2.49511	3.51056	1.42102	3.44355	78±2	92±4	87±1	85±3	0.0191069	47.3086	10.208	1	0	0	0	0	0		100
10845470	Baz2b	Baz2b	bromodomain adjacent to zinc finger domain, 2B	834.504	24		783.828	850.41	859.195	822.585	32.287	59.1743	36.1788	25.8571	13.1811	24.1578	14.7699	10.5561	784±13	850±24	859±15	823±11	0.0163742	1531.9	58.088	1	1	0	0	0	0		100
10750900	Bbx	Bbx	bobby sox homolog (Drosophila)	656.567	24		615.269	672.758	676.383	656.625	23.1632	30.713	29.5045	24.5307	9.45633	12.5385	12.0451	10.0146	615±9	673±13	676±12	657±10	0.00370871	727.219	40.0224	1	1	1	0	0	0		100
10940164	Bcap31	Bcap31	B-cell receptor-associated protein 31	1035.49	24		971.763	1048.64	1046.08	1040.5	31.9078	65.8128	41.7583	58.4373	13.0263	26.868	17.0478	23.8569	972±13	1049±27	1046±17	1040±24	0.0494825	2537.33	74.7582	1	0	0	0	0	0		100
10744376	Bcl6b	Bcl6b	B-cell CLL/lymphoma 6, member B	82.8932	24		73.1987	93.9133	81.5061	80.094	8.19317	19.7828	6.44751	3.21788	3.34485	8.07631	2.63218	1.3137	73±3	94±8	82±3	80±1	0.0355499	113.722	15.8268	1	0	0	0	0	0		100
10832602	Bcr	Bcr	breakpoint cluster region	653.738	24		627.798	688.347	674.091	647.91	19.3529	63.5187	20.2629	18.9952	7.9008	25.9314	8.27228	7.75477	628±8	688±26	674±8	648±8	0.0342503	1150.96	50.3501	1	0	0	0	0	0		100
10730131	Blnk	Blnk	B-cell linker	143.165	24		108.202	140.471	137.906	129.588	7.08917	30.1927	11.8139	9.70081	2.89414	12.3261	4.82301	3.96034	108±3	140±12	138±5	130±4	0.0132612	266.634	24.2342	1	1	0	0	0	0		100
10899959	Bloc1s1	Bloc1s1	biogenesis of lysosomal organelles complex-1, subunit 1	601.214	24		575.759	626.643	616.192	593.758	21.1372	33.3678	32.797	24.8916	8.62922	13.6223	13.3893	10.1619	576±9	627±14	616±13	594±10	0.0306874	798.09	41.9273	1	0	0	0	0	0		100
10775606	Bmp2k	Bmp2k	BMP-2 inducible kinase	875.623	24		779.032	867.339	878.925	892.939	27.3536	24.5974	46.7752	28.4124	11.1671	10.0419	19.0959	11.5993	779±11	867±10	879±19	893±12	4.27868e-05	1112.48	49.5014	1	1	1	0	0	0		100
10797949	Bmp6	Bmp6	bone morphogenetic protein 6	419.283	24	Up	369.515	458.009	420.894	433.488	23.2729	55.3091	34.6289	32.4612	9.50113	22.5798	14.1372	13.2522	370±10	458±23	421±14	433±13	0.00588095	1379.42	55.1212	1	0	1	0	0	0		100
10852106	Bmp7	Bmp7	bone morphogenetic protein 7	446.543	24		392.908	510.45	400.836	498.803	31.7021	117.666	20.6233	99.5125	12.9423	48.0369	8.41943	40.6258	393±13	510±48	401±8	499±41	0.0282919	5897.18	113.971	1	0	0	0	0	0		100
10841128	Bpifb4	Bpifb4	BPI fold containing family B, member 4	73.8626	24		53.9361	80.4404	75.9038	80.2294	4.13798	8.64327	5.8856	11.7868	1.68932	3.5286	2.40279	4.81196	54±2	80±4	76±2	80±5	4.28332e-05	65.9099	12.0489	1	1	1	0	0	0		100
10718102	Brp44l	Brp44l	brain protein 44-like	825.51	24		803.358	835.534	839.384	839.154	18.8626	15.3743	23.5054	20.2602	7.70061	6.27654	9.59603	8.2712	803±8	836±6	839±10	839±8	0.0144211	396.808	29.5639	1	1	1	0	0	0		100
10711532	Btbd16	Btbd16	BTB (POZ) domain containing 16	205.597	24		185.969	213.728	220.475	201.386	10.7245	22.3324	10.5615	25.5609	4.37824	9.11716	4.31172	10.4352	186±4	214±9	220±4	201±10	0.0224109	336.554	27.2269	1	1	0	0	0	0		100
10891867	Btbd7	Btbd7	BTB (POZ) domain containing 7	241.064	24		222.631	250.13	248.123	238.108	14.0078	9.9072	18.4476	9.89803	5.71867	4.0446	7.53118	4.04085	223±6	250±4	248±8	238±4	0.0113786	187.638	20.3297	1	1	0	0	0	0		100
10939293	Btk	Btk	Bruton agammaglobulinemia tyrosine kinase	57.4068	24		47.1622	60.2746	55.6163	52.8143	4.56629	8.20211	4.38122	6.92391	1.86418	3.3485	1.78862	2.82668	47±2	60±3	56±2	53±3	0.0156101	37.3174	9.06623	1	0	0	0	0	0		100
10865442	C1s	C1s	complement component 1, s subcomponent	100.211	24		82.4168	110.535	97.9039	96.8584	7.30007	28.6006	9.54531	7.53086	2.98024	11.6762	3.89685	3.07446	82±3	111±12	98±4	97±3	0.0451788	225.135	22.2686	1	0	0	0	0	0		100
10931717	C3	C3	complement component 3	636.981	24		259.325	841.139	704.277	593.201	9.75233	630.965	178.636	212.789	3.98137	257.591	72.9277	86.8705	259±4	841±258	704±73	593±87	0.0404353	104152	478.967	1	0	0	0	0	0		100
10865369	C3ar1	C3ar1	complement component 3a receptor 1	115.568	24		86.7339	122.42	104.345	101.144	10.0045	24.6964	16.7259	10.1447	4.08434	10.0823	6.82832	4.14154	87±4	122±10	104±7	101±4	0.0142275	255.445	23.7202	1	0	0	0	0	0		100
10846762	Calcrl	Calcrl	calcitonin receptor-like	235.81	24		201.883	252.962	237.352	222.37	6.73488	46.492	14.8605	23.1697	2.7495	18.9803	6.06677	9.459	202±3	253±19	237±6	222±9	0.0237815	666.378	38.3117	1	0	0	0	0	0		100
10856415	Capg	Capg	capping protein (actin filament), gelsolin-like	181.383	24		148.794	189.834	176.643	168.4	8.46136	24	17.3048	8.03654	3.45433	9.79795	7.06465	3.2809	149±3	190±10	177±7	168±3	0.00233381	235.904	22.7949	1	1	0	0	0	0		100
10822242	Car3	Car3	carbonic anhydrase 3	118.957	24		99.5754	147.572	115.392	117.258	7.76114	50.0203	11.8572	12.9671	3.16847	20.4207	4.84067	5.29378	100±3	148±20	115±5	117±5	0.0375753	623.842	37.0688	1	0	0	0	0	0		100
10875375	Car8	Car8	carbonic anhydrase 8	86.8198	24		75.8713	91.729	92.1796	88.1355	11.9189	7.27008	8.80443	4.77152	4.86585	2.968	3.59439	1.94797	76±5	92±3	92±4	88±2	0.0144954	74.902	12.8445	1	1	0	0	0	0		100
10821685	Card6	Card6	caspase recruitment domain family, member 6	73.6757	24		62.7592	73.9894	71.6765	72.6734	6.3171	7.69079	6.8696	3.03921	2.57894	3.13975	2.8045	1.24075	63±3	74±3	72±3	73±1	0.0230098	37.8033	9.12506	1	0	1	0	0	0		100
10838733	Casc5	Casc5	cancer susceptibility candidate 5	74.4149	24		53.7132	82.2518	76.9128	82.4078	2.2424	10.0449	10.3104	9.13601	0.915457	4.1008	4.20922	3.72976	54±1	82±4	77±4	82±4	2.92446e-05	72.5052	12.6373	1	1	1	0	0	0		100
10907815	Casp1	Casp1	caspase 1	99.6582	24		77.9285	109.092	91.5048	93.1618	4.418	31.6448	12.3231	7.34934	1.80364	12.9189	5.0309	3.00036	78±2	109±13	92±5	93±3	0.0435174	270.133	24.3927	1	0	0	0	0	0		100
10907825	Casp4	Casp4	caspase 4, apoptosis-related cysteine peptidase	131.4	24		87.028	136.095	127.587	113.946	7.14769	36.3263	14.596	18.6877	2.91803	14.8301	5.95878	7.62923	87±3	136±15	128±6	114±8	0.00478249	439.222	31.1037	1	1	0	0	0	0		100
10838373	Ccdc34	Ccdc34	coiled-coil domain containing 34	385.47	24		357.944	409.384	393.253	389.725	17.1969	43.0321	27.1039	21.0493	7.02061	17.5678	11.0651	8.59335	358±7	409±18	393±11	390±9	0.0402959	777.589	41.3853	1	0	0	0	0	0		100
10894722	Ccdc53	Ccdc53	coiled-coil domain containing 53	247.173	24		231.63	254.305	247.282	246.929	13.5982	16.5448	7.79163	8.5368	5.55143	6.7544	3.18092	3.48514	232±6	254±7	247±3	247±3	0.0307355	141.443	17.6507	1	0	0	0	0	0		100
10747589	Ccr10	Ccr10	chemokine (C-C motif) receptor 10	414.819	24		344.155	431.228	454.828	439.475	44.873	44.4095	48.9372	84.2144	18.3193	18.1301	19.9785	34.3804	344±18	431±18	455±20	439±34	0.0177364	3441.65	87.0671	1	1	1	0	0	0		100
10812775	Cd180	Cd180	CD180 molecule	264.553	24		195.504	268.832	268.887	251.532	9.54263	76.6455	23.4142	16.5676	3.89576	31.2904	9.55881	6.76369	196±4	269±31	269±10	252±7	0.0119458	1477.21	57.0417	1	1	0	0	0	0		100
10845508	Cd302	Cd302	CD302 molecule	452.509	24		343.075	476.542	474.478	468.465	17.4266	31.2211	19.2717	20.5151	7.11437	12.746	7.86765	8.37526	343±7	477±13	474±8	468±8	2.95259e-09	493.622	32.9737	1	1	1	0	0	0		100
10865585	Cd4	Cd4	Cd4 molecule	388.112	24		205.036	452.743	389.155	359.417	8.48802	263.99	86.825	78.1624	3.46522	107.773	35.4462	31.9097	205±3	453±108	389±35	359±32	0.0377768	18282.3	200.671	1	0	0	0	0	0		100
10765634	Cd48	Cd48	Cd48 molecule	1565.95	24		1352.42	1578.04	1542.93	1496.6	92.443	107.487	58.5469	85.2183	37.7397	43.8812	23.9017	34.7902	1352±38	1578±44	1543±24	1497±35	0.00161697	7494.29	128.48	1	1	1	0	0	0		100
10825809	Cd53	Cd53	Cd53 molecule	407.411	24	Up	239.017	414.295	383.839	338.48	20.7139	183.376	42.066	44.8233	8.45641	74.8629	17.1734	18.299	239±8	414±75	384±17	338±18	0.0214008	8186.61	134.284	1	1	0	0	0	0		100
10728780	Cd6	Cd6	Cd6 molecule	117.297	24		105.144	118.461	114.987	116.737	3.52479	9.97048	6.38361	6.82501	1.43899	4.07043	2.6061	2.7863	105±1	118±4	115±3	117±3	0.0168994	47.1799	10.1941	1	0	1	0	0	0		100
10893258	Cd63	Cd63	Cd63 molecule	1131.06	24	Up	869.794	1192.54	1042.56	1151.03	14.3388	173.852	81.0173	150.799	5.85378	70.9747	33.0752	61.5633	870±6	1193±71	1043±33	1151±62	0.000922909	14128.7	176.41	1	0	1	0	0	0		100
10802013	Cd74	Cd74	Cd74 molecule, major histocompatibility complex, class II invariant chain	478.099	24	Up	130.613	443.955	413.525	480.442	27.8794	72.5761	104.128	313.478	11.3817	29.6291	42.5099	127.977	131±11	444±30	414±43	480±128	0.0120779	31092.6	261.697	1	1	1	0	0	0		100
10765650	Cd84	Cd84	CD84 molecule	247.761	24		163.118	239.131	225.345	214.738	11.5759	71.76	26.6359	19.8606	4.72585	29.2959	10.874	8.10804	163±5	239±29	225±11	215±8	0.0152967	1409.87	55.7264	1	1	0	0	0	0		100
10754384	Cd86	Cd86	CD86 molecule	93.8146	24		62.7178	92.7694	80.4402	79.9427	6.13702	28.4714	10.1089	12.533	2.50543	11.6234	4.12692	5.11657	63±3	93±12	80±4	80±5	0.0385529	248.796	23.4095	1	0	0	0	0	0		100
10900821	Cdc34	Cdc34	cell division cycle 34 homolog (S. cerevisiae)	179.865	24		167.606	193.044	184.842	175.819	14.0245	13.6394	10.3131	11.1087	5.72547	5.56826	4.21032	4.53509	168±6	193±6	185±4	176±5	0.0158616	151.388	18.2607	1	0	0	0	0	0		100
10832937	Cdh23	Cdh23	cadherin-related 23	129.703	24		113.586	131.355	137.272	132.73	7.26265	12.0517	5.58907	11.277	2.96496	4.92009	2.28173	4.60382	114±3	131±5	137±2	133±5	0.00162853	86.1446	13.7748	1	1	1	0	0	0		100
10737927	Cdk12	Cdk12	cyclin-dependent kinase 12	584.596	24		553.553	609.936	580.588	585.933	22.9426	25.3873	32.1203	25.0751	9.36627	10.3643	13.1131	10.2369	554±9	610±10	581±13	586±10	0.0202617	711.171	39.5784	1	0	0	0	0	0		100
10877585	Cdk5rap2	Cdk5rap2	CDK5 regulatory subunit associated protein 2	206.437	24		188.899	210.321	212.028	197.824	6.48974	9.72073	13.6134	7.75752	2.64942	3.96847	5.55765	3.167	189±3	210±4	212±6	198±3	0.00193028	95.5829	14.5098	1	1	0	0	0	0		100
10844355	Cdk9	Cdk9	cyclin-dependent kinase 9	777.677	24		754.836	795.62	804.037	764.313	17.9278	39.3905	16.5407	26.0816	7.31901	16.0811	6.7527	10.6478	755±7	796±16	804±7	764±11	0.0100571	662.247	38.1928	1	1	0	0	0	-1		100
10724637	Cdv3	Cdv3	carnitine deficiency-associated gene expressed in ventricle 3 homolog (mouse)	680.789	24		649.189	701.483	666.529	686.456	16.5819	53.9179	20.7009	20.7545	6.76954	22.0119	8.45111	8.47298	649±7	701±22	667±8	686±8	0.0470799	910.511	44.783	1	0	0	0	0	0		100
10882450	Cebpz	Cebpz	CCAAT/enhancer binding protein zeta	677.717	24		644.543	697.625	686.847	679.825	27.2902	26.4386	20.773	31.995	11.1412	10.7935	8.48053	13.0619	645±11	698±11	687±8	680±13	0.0200298	726.093	39.9914	1	1	0	0	0	0		100
10784074	Cenpj	Cenpj	centromere protein J	162.09	24		146.713	168.899	169.952	158.232	9.11904	6.74927	7.36831	9.91354	3.72283	2.75538	3.0081	4.04719	147±4	169±3	170±3	158±4	0.000454868	71.6235	12.5603	1	1	0	0	0	0		100
10919609	Cep63	Cep63	centrosomal protein 63	233.64	24		219.346	240.996	238.056	232.757	7.19699	13.385	12.5645	8.92141	2.93816	5.46442	5.12942	3.64215	219±3	241±5	238±5	233±4	0.0134695	113.837	15.8348	1	1	0	0	0	0		100
10768269	Cfh	Cfh	complement factor H	517.21	24		360.491	546.454	501.766	488.229	10.7928	129.062	32.871	81.3441	4.40614	52.6893	13.4195	33.2086	360±4	546±53	502±13	488±33	0.00317779	5563	110.694	1	1	1	0	0	0		100
10782314	Chchd1	Chchd1	coiled-coil-helix-coiled-coil-helix domain containing 1	532.775	24		507.611	545.682	560.171	527.221	29.535	21.1849	21.6832	14.8538	12.0576	8.6487	8.85214	6.06405	508±12	546±9	560±9	527±6	0.00441616	505.831	33.379	1	1	0	0	0	0		100
10858784	Chd4	Chd4	chromodomain helicase DNA binding protein 4	988.59	24		919.425	1006.85	1008.83	1001.45	29.7101	26.7265	36.2515	21.738	12.1291	10.911	14.7996	8.87451	919±12	1007±11	1009±15	1001±9	7.70585e-05	852.855	43.3419	1	1	1	0	0	0		100
10764069	Chi3l1	Chi3l1	chitinase 3-like 1 (cartilage glycoprotein-39)	1376.36	24		1108.96	1251.89	1251.37	1215.45	29.2871	158.901	64.097	24.0602	11.9564	64.8711	26.1675	9.82254	1109±12	1252±65	1251±26	1215±10	0.0244107	6774.93	122.158	1	1	0	0	0	0		100
10784913	Chmp7	Chmp7	charged multivesicular body protein 7	1605.03	24		1544.74	1660.37	1668.63	1590.31	75.0213	63.7546	46.3662	69.6167	30.6273	26.0277	18.9289	28.4209	1545±31	1660±26	1669±19	1590±28	0.0113487	4177.95	95.9296	1	1	0	0	0	0		100
10803315	Chst9	Chst9	carbohydrate (N-acetylgalactosamine 4-0) sulfotransferase 9	251.096	24		215.782	295.687	255.125	235.839	31.5532	60.2406	16.9222	47.208	12.8815	24.5931	6.90846	19.2726	216±13	296±25	255±7	236±19	0.029617	1687.82	60.9724	1	0	0	0	0	0		100
10858559	Clec4a3	Clec4a3	C-type lectin domain family 4, member A3	84.1107	24		53.6942	101.195	74.3424	76.5958	5.52854	49.6582	4.45757	13.6327	2.25702	20.2729	1.8198	5.56553	54±2	101±20	74±2	77±6	0.0344806	581.324	35.7833	1	0	0	0	0	0		100
10792676	Cln8	Cln8	ceroid-lipofuscinosis, neuronal 8 (epilepsy, progressive with mental retardation)	303.222	24		288.229	311.009	291.227	315.515	11.271	9.66426	18.8544	15.8212	4.60137	3.94542	7.69726	6.45898	288±5	311±4	291±8	316±6	0.00860109	212.514	21.6354	1	0	1	0	0	1		100
10868634	Clta	Clta	clathrin, light chain A	1666.24	24		1603.01	1699.84	1704.05	1653.33	45.0719	46.6532	42.0546	68.0232	18.4005	19.0461	17.1687	27.7704	1603±18	1700±19	1704±17	1653±28	0.0112411	2675.91	76.7726	1	1	0	0	0	0		100
10814105	Cmbl	Cmbl	carboxymethylenebutenolidase homolog (Pseudomonas)	234.092	24		205.172	237.496	251.021	239.686	14.2786	23.7318	10.1831	12.4809	5.8292	9.68846	4.15724	5.09529	205±6	237±10	251±4	240±5	0.000438153	240.501	23.016	1	1	1	0	0	0		100
10759198	Cmklr1	Cmklr1	chemokine-like receptor 1	105.235	24		79.9779	108.951	99.6934	84.3113	2.43135	35.9664	10.3945	7.02098	0.992593	14.6832	4.24352	2.8663	80±1	109±15	100±4	84±3	0.0476943	315.294	26.3529	1	0	0	0	0	0		100
10809018	Cmtm3	Cmtm3	CKLF-like MARVEL transmembrane domain containing 3	112.328	24		93.3895	107.116	109.779	112.528	6.29532	11.1444	11.0573	7.76717	2.57005	4.54967	4.51411	3.17093	93±3	107±5	110±5	113±3	0.00920041	84.6265	13.6529	1	1	1	0	0	0		100
10818698	Cnn3	Cnn3	calponin 3, acidic	1145.9	24	Up	986.378	1179.26	1101.07	1129.71	32.4709	104.948	49.7787	77.728	13.2562	42.8447	20.3221	31.7323	986±13	1179±43	1101±20	1130±32	0.0013271	4838.19	103.231	1	1	1	0	0	0		100
10733773	Cnot8	Cnot8	CCR4-NOT transcription complex, subunit 8	464.859	24		441.21	475.014	478.165	456.825	11.8215	14.7052	17.8193	16.9876	4.8261	6.00339	7.27469	6.93517	441±5	475±6	478±7	457±7	0.00212748	241.802	23.0781	1	1	0	0	0	0		100
10757239	Cnpy4	Cnpy4	canopy 4 homolog (zebrafish)	267.164	24		251.848	274.293	272.87	264.425	6.01466	14.4546	16.3412	9.87091	2.45547	5.90105	6.67126	4.02978	252±2	274±6	273±7	264±4	0.0211266	149.419	18.1415	1	1	0	0	0	0		100
10869695	Cntln	Cntln	centlein, centrosomal protein	235.288	24		222.559	246.571	243.979	230.095	11.1501	24.2152	11.4685	11.2467	4.552	9.88582	4.68199	4.59144	223±5	247±10	244±5	230±5	0.0423802	224.063	22.2155	1	0	0	0	0	0		100
10845767	Cobll1	Cobll1	Cobl-like 1	225.518	24		195.38	238.155	235.244	234.022	10.8262	28.7293	21.2829	17.5289	4.41979	11.7287	8.68871	7.15614	195±4	238±12	235±9	234±7	0.00480733	404.666	29.8551	1	1	1	0	0	0		100
10752303	Comt	Comt	catechol-O-methyltransferase	746.581	24		666.286	773.193	763.839	727.63	40.5802	106.816	17.8422	27.2287	16.5668	43.6073	7.28406	11.1161	666±17	773±44	764±7	728±11	0.0172187	3114.26	82.8225	1	1	0	0	0	0		100
10778997	Comtd1	Comtd1	catechol-O-methyltransferase domain containing 1	260.969	24		223.145	274.961	273.683	267.571	22.1131	50.4626	16.9777	34.493	9.02765	20.6013	6.93113	14.0817	223±9	275±21	274±7	268±14	0.0393018	1053.73	48.1766	1	1	0	0	0	0		100
10712829	Coro1b	Coro1b	coronin, actin-binding protein, 1B	545.432	24		501.463	557.819	563.461	533.665	16.3188	10.3017	15.2156	23.8291	6.66212	4.20565	6.21176	9.7282	501±7	558±4	563±6	534±10	2.55259e-05	302.775	25.8245	1	1	1	0	0	-1		100
10918075	Coro2b	Coro2b	coronin, actin binding protein, 2B	1295.51	24		1270.19	1356.64	1333.3	1278.38	27.4887	51.8699	42.5886	79.6658	11.2222	21.1758	17.3867	32.5234	1270±11	1357±21	1333±17	1278±33	0.039842	2912.75	80.0981	1	0	0	0	0	0		100
10903267	Cox6c	Cox6c	cytochrome c oxidase, subunit VIc	2884.09	24		2820.77	2961.98	2918.97	2867.42	73.1836	108.834	36.9793	61.8274	29.8771	44.4315	15.0967	25.2409	2821±30	2962±44	2919±15	2867±25	0.0236114	5268.91	107.729	1	0	0	0	0	0		100
10728383	Cox8a	Cox8a	cytochrome c oxidase subunit VIIIa	4497.7	24		4375.55	4559.38	4569.01	4632.73	125.662	83.1188	142.157	127.589	51.3013	33.9331	58.0354	52.0878	4376±51	4559±34	4569±58	4633±52	0.0116955	15212	183.047	1	1	1	0	0	0		100
10723240	Cpeb1	Cpeb1	cytoplasmic polyadenylation element binding protein 1	350.91	24		327.583	366.126	371.803	348.928	16.3108	8.24743	20.7223	15.6147	6.65887	3.367	8.45984	6.37466	328±7	366±3	372±8	349±6	0.000695146	261.498	23.9996	1	1	0	0	0	0		100
10777290	Cpeb2	Cpeb2	cytoplasmic polyadenylation element binding protein 2	1231.1	24		1179.62	1280.46	1252.4	1238.49	26.2994	95.76	31.9503	35.9461	10.7367	39.0939	13.0437	14.6749	1180±11	1280±39	1252±13	1238±15	0.0285881	2721.21	77.4197	1	0	0	0	0	0		100
10741814	Cpeb4	Cpeb4	cytoplasmic polyadenylation element binding protein 4	1392.84	24		1346.12	1428.32	1419.91	1392.78	26.5366	38.0948	42.188	63.0559	10.8335	15.5522	17.2232	25.7425	1346±11	1428±16	1420±17	1393±26	0.0244508	2005.54	66.464	1	1	0	0	0	0		100
10875680	Cpne3	Cpne3	copine III	407.359	24		373.881	413.543	394.325	415.75	10.1105	23.7474	12.5197	10.4913	4.1276	9.69483	5.11116	4.28307	374±4	414±10	394±5	416±4	0.000306994	215.838	21.8039	1	0	1	0	0	0		100
10713894	Cpsf7	Cpsf7	cleavage and polyadenylation specific factor 7	310.48	24		292.897	322.992	313.991	311.965	15.4843	15.2541	15.3341	12.2249	6.32146	6.22748	6.26012	4.99079	293±6	323±6	314±6	312±5	0.0186446	213.289	21.6748	1	0	0	0	0	0		100
10750580	Crybg3	Crybg3	beta-gamma crystallin domain containing 3	162.029	24		142.966	163.768	169.376	160.553	9.79054	15.4466	17.7017	10.0772	3.99697	6.30605	7.22667	4.11402	143±4	164±6	169±7	161±4	0.0196947	184.64	20.1666	1	1	0	0	0	0		100
10825869	Csf1	Csf1	colony stimulating factor 1 (macrophage)	513.817	24		416.04	523.664	503.458	520.217	13.0669	14.1138	44.4367	17.6872	5.33454	5.76194	18.1412	7.22079	416±5	524±6	503±18	520±7	2.27332e-06	688.833	38.9518	1	1	1	0	0	0		100
10802065	Csf1r	Csf1r	colony stimulating factor 1 receptor	1014.37	24		734.2	1071.06	962.082	936.813	19.0224	333.129	81.8534	71.9207	7.76585	135.999	33.4165	29.3615	734±8	1071±136	962±33	937±29	0.0196897	26582.7	241.975	1	0	0	0	0	0		100
10850563	Cst3	Cst3	cystatin C	5483.18	24	Up	4963.28	5569.51	5225.06	5857.8	70.2362	673.813	150.396	447.572	28.6738	275.083	61.399	182.72	4963±29	5570±275	5225±61	5858±183	0.00525989	155550	585.337	1	0	1	0	0	1		100
10832228	Cstb	Cstb	cystatin B (stefin B)	669.336	24		625.208	680.827	673.593	667.303	25.3093	31.8539	22.7226	14.0415	10.3325	13.0043	9.27645	5.73243	625±10	681±13	674±9	667±6	0.00367067	569.941	35.4312	1	1	1	0	0	0		100
10805242	Ctif	Ctif	CBP80/20-dependent translation initiation factor	424.585	24		411.241	444.091	443.741	419.052	17.2303	8.8763	9.42695	26.4964	7.03423	3.62374	3.84854	10.8171	411±7	444±4	444±4	419±11	0.0072422	302.853	25.8278	1	1	0	0	0	0		100
10846794	Ctnnd1	Ctnnd1	catenin (cadherin associated protein), delta 1	792.146	24		759.009	804.961	795.781	778.981	15.6912	29.3556	23.276	32.8868	6.40591	11.9844	9.50238	13.426	759±6	805±12	796±10	779±13	0.0379957	673.402	38.5131	1	0	0	0	0	0		100
10842203	Ctsa	Ctsa	cathepsin A	1422.3	24		1309.44	1430.23	1373.51	1419.41	36.6066	64.7938	33.8884	98.428	14.9446	26.452	13.8349	40.1831	1309±15	1430±26	1374±14	1419±40	0.018715	4088.19	94.8935	1	0	1	0	0	0		100
10708521	Ctsc	Ctsc	cathepsin C	155.085	24		118.478	170.565	131.237	153.715	10.2441	37.3065	1.72522	36.7352	4.18212	15.2303	0.704318	14.9971	118±4	171±15	131±1	154±15	0.0220662	713.95	39.6556	1	0	0	0	0	0		100
10726979	Ctsd	Ctsd	cathepsin D	2231.72	24	Up	1850.55	2234.15	2068.78	2177.63	67.5585	199.469	77.1264	300.467	27.5806	81.4328	31.4867	122.665	1851±28	2234±81	2069±31	2178±123	0.0128043	34900.9	277.261	1	0	1	0	0	0		100
10763808	Ctse	Ctse	cathepsin E	135.99	24		114.005	139.986	135.124	125.657	6.73543	15.5028	14.126	6.05005	2.74973	6.32897	5.7669	2.46992	114±3	140±6	135±6	126±2	0.00483291	124.679	16.5717	1	1	0	0	0	0		100
10912161	Ctsh	Ctsh	cathepsin H	851.99	24	Up	680.265	893.412	824.548	786.099	25.425	147.52	54.7579	11.6316	10.3797	60.2246	22.3548	4.74857	680±10	893±60	825±22	786±5	0.00180663	5878.53	113.79	1	1	0	0	0	0		100
10793458	Ctsl1	Ctsl1	cathepsin L1	901.096	24		775.924	930.251	868.074	868.277	26.7195	63.493	12.8746	60.0794	10.9082	25.9209	5.25605	24.5273	776±11	930±26	868±5	868±25	0.000193956	2030.08	66.8694	1	1	1	0	0	0		100
10817429	Ctss	Ctss	cathepsin S	2619.75	24	Up	2018.56	2602.83	2609.44	2651.28	71.2902	457.516	157.586	208.847	29.1041	186.78	64.3344	85.2615	2019±29	2603±187	2609±64	2651±85	0.000852057	63418.3	373.747	1	1	1	0	0	0		100
10825702	Cttnbp2nl	Cttnbp2nl	CTTNBP2 N-terminal like	367.13	24		325.294	373.814	365.176	341.089	21.5217	40.4932	25.991	25.0795	8.7862	16.5313	10.6108	10.2386	325±9	374±17	365±11	341±10	0.0377554	810.382	42.2489	1	0	0	0	0	0		100
10920981	Cx3cr1	Cx3cr1	chemokine (C-X3-C motif) receptor 1	842.633	24		637.023	868.058	833.98	823.623	33.7133	233.51	72.1769	80.2949	13.7634	95.3301	29.4661	32.7803	637±14	868±95	834±29	824±33	0.0186672	14846	180.832	1	1	1	0	0	0		100
10802603	Cxxc1	Cxxc1	CXXC finger protein 1	367.477	24		350.432	373.008	376.272	360.873	10.7135	7.78227	17.6239	11.1147	4.37376	3.1771	7.19492	4.53756	350±4	373±3	376±7	361±5	0.0085383	157.202	18.608	1	1	0	0	0	0		100
10724625	Cyb5r2	Cyb5r2	cytochrome b5 reductase 2	87.5251	24		70.7117	100.558	89.6879	91.4006	6.63519	19.8844	9.12989	10.2357	2.7088	8.11779	3.72726	4.1787	71±3	101±8	90±4	91±4	0.00420746	144.332	17.8301	1	1	1	0	0	0		100
10905078	Cyhr1	Cyhr1	cysteine and histidine rich 1	772.692	24		755.005	789.255	809.147	757.293	15.9912	14.8403	19.3852	33.2687	6.52838	6.05853	7.91397	13.5819	755±7	789±6	809±8	757±14	0.00114844	503.815	33.3124	1	1	0	0	0	-1		100
10878157	Cyp2j4	Cyp2j4	cytochrome P450, family 2, subfamily j, polypeptide 4	246.421	24		223.839	247.355	240.865	255.021	13.6925	18.1328	6.28081	20.2108	5.58993	7.4027	2.56413	8.25103	224±6	247±7	241±3	255±8	0.0160021	236.434	22.8205	1	0	1	0	0	0		100
10788246	Cyp4v3	Cyp4v3	cytochrome P450, family 4, subfamily v, polypeptide 3	154.115	24		137.9	166.751	146.584	157.271	4.07852	22.5217	8.34808	20.6659	1.66505	9.19444	3.40809	8.43683	138±2	167±9	147±3	157±8	0.0324055	241.891	23.0824	1	0	0	0	0	0		100
10752831	Cyyr1	Cyyr1	cysteine/tyrosine-rich 1	295.125	24		273.695	317.373	296.321	294.722	16.3327	13.2792	15.0639	17.0042	6.66779	5.42121	6.1498	6.94192	274±7	317±5	296±6	295±7	0.00205473	243.128	23.1413	1	0	0	0	0	0		100
10826985	Dapp1	Dapp1	dual adaptor of phosphotyrosine and 3-phosphoinositides	233.301	24		173.157	239.103	228.17	211.779	12.6033	66.3916	32.6294	21.583	5.14527	27.1042	13.3209	8.81121	173±5	239±27	228±13	212±9	0.0365681	1372.53	54.9834	1	1	0	0	0	0		100
10799627	Dclre1c	Dclre1c	DNA cross-link repair 1C	164.404	24		156.614	170.778	166.255	161.006	8.12858	4.01768	7.7433	7.77124	3.31848	1.64021	3.16119	3.1726	157±3	171±2	166±3	161±3	0.022723	52.4574	10.7492	1	0	0	0	0	0		100
10791604	Dctd	Dctd	dCMP deaminase	334.218	24		284.47	337.275	340.16	318.751	24.2725	35.5319	20.3922	15.5387	9.90923	14.5058	8.32506	6.34364	284±10	337±15	340±8	319±6	0.00337264	593.805	36.1654	1	1	0	0	0	0		100
10895844	Dctn2	Dctn2	dynactin 2 (p50)	1040.87	24		1002.42	1060.26	1083.99	1030.37	15.2753	39.8284	30.0259	41.1119	6.23612	16.2599	12.258	16.7839	1002±6	1060±16	1084±12	1030±17	0.00242663	1077.4	48.7146	1	1	0	0	0	-1		100
10875988	Ddx58	Ddx58	DEAD (Asp-Glu-Ala-Asp) box polypeptide 58	200.281	24		176.219	200.418	201.094	199.003	15.2658	22.4066	13.3436	10.7201	6.23224	9.14745	5.44751	4.37647	176±6	200±9	201±5	199±4	0.036018	244.122	23.1886	1	1	0	0	0	0		100
10879446	Dem1	Dem1	defects in morphology 1 homolog (S. cerevisiae)	128.629	24		116.129	128.893	132.249	123.871	9.38494	5.65288	7.13504	7.95969	3.83139	2.30778	2.91287	3.24953	116±4	129±2	132±3	124±3	0.0114673	59.9754	11.4936	1	1	0	0	0	0		100
10859382	Dera-ps1	Dera-ps1	deoxyribose-phosphate aldolase, pseudogene 1	296.072	24		269.057	293.712	294.228	303.947	12.3919	18.4963	8.76745	22.0183	5.05897	7.5511	3.5793	8.98893	269±5	294±8	294±4	304±9	0.00938326	260.243	23.942	1	1	1	0	0	0		100
10880415	Dhdds	Dhdds	dehydrodolichyl diphosphate synthase	617.319	24		596.836	634.104	636.325	613.596	19.6834	15.3175	19.4691	30.3034	8.03571	6.25334	7.94824	12.3713	597±8	634±6	636±8	614±12	0.0211821	492.758	32.9449	1	1	0	0	0	0		100
10780289	Dhrs4	Dhrs4	dehydrogenase/reductase (SDR family) member 4	199.719	24		175.639	205.467	197.802	206.319	9.92465	21.7057	17.3329	11.2917	4.05172	8.86132	7.07613	4.60983	176±4	205±9	198±7	206±5	0.0097736	237.722	22.8826	1	0	1	0	0	0		100
10796262	Dhtkd1	Dhtkd1	dehydrogenase E1 and transketolase domain containing 1	236.749	24		228.697	249.595	239.174	237.901	8.94333	12.778	6.54513	12.9226	3.6511	5.21661	2.67204	5.27561	229±4	250±5	239±3	238±5	0.0324631	110.641	15.611	1	0	0	0	0	0		100
10829944	Dnajb12	Dnajb12	DnaJ (Hsp40) homolog, subfamily B, member 12	885.865	24		862.246	897.3	900.861	891.769	17.87	27.2963	18.5921	27.6021	7.29538	11.1437	7.59017	11.2685	862±7	897±11	901±8	892±11	0.0377677	532.355	34.243	1	1	0	0	0	0		100
10924494	Dnajb2	Dnajb2	DnaJ (Hsp40) homolog, subfamily B, member 2	773.557	24		734.956	782.748	799.357	784.065	21.861	37.0558	30.2667	36.8169	8.92472	15.128	12.3563	15.0304	735±9	783±15	799±12	784±15	0.0139143	1012.62	47.2275	1	1	1	0	0	0		100
10810029	Dnase2a	Dnase2a	deoxyribonuclease II alpha	357.749	24		316.756	358.999	334.557	356.162	15.6332	21.8332	20.8634	13.4803	6.38221	8.91338	8.51744	5.50329	317±6	359±9	335±9	356±6	0.00246951	327.039	26.8392	1	0	1	0	0	0		100
10711791	Dock1	Dock1	dedicator of cyto-kinesis 1	552.942	24		496.82	586.064	535.178	559.242	17.4696	61.1956	11.4969	39.1225	7.13194	24.983	4.69359	15.9717	497±7	586±25	535±5	559±16	0.0042818	1306.28	53.64	1	0	1	0	0	0		100
10714456	Dock8	Dock8	dedicator of cytokinesis 8	186.369	24		137.342	192.298	177.583	169.745	5.67047	51.6386	19.8982	20.7644	2.31496	21.0814	8.1234	8.47702	137±2	192±21	178±8	170±8	0.0255792	787.497	41.6481	1	0	0	0	0	0		100
10843424	Dpp7	Dpp7	dipeptidylpeptidase 7	525.578	24		459.425	532.715	511.499	502.741	18.4825	37.9753	14.7173	25.2539	7.54545	15.5033	6.00829	10.3099	459±8	533±16	511±6	503±10	0.000789436	618.331	36.9047	1	1	1	0	0	0		100
10818660	Dpyd	Dpyd	dihydropyrimidine dehydrogenase	295.297	24		274.135	311.599	313.368	289.056	16.4991	25.5037	12.4612	30.6806	6.73574	10.4118	5.08725	12.5253	274±7	312±10	313±5	289±13	0.0203409	497.145	33.0912	1	1	0	0	0	0		100
10797966	Dsp	Dsp	desmoplakin	320.361	24		265.527	337.925	331.523	341.48	19.8647	81.4258	21.6494	17.7566	8.10975	33.242	8.83831	7.24908	266±8	338±33	332±9	341±7	0.0154048	1705.98	61.2996	1	1	1	0	0	0		100
10751459	Dtx3l	Dtx3l	deltex 3-like (Drosophila)	82.4095	24		71.8116	87.0422	78.8037	82.8188	5.85069	7.12937	4.1871	9.11496	2.38853	2.91055	1.70938	3.72116	72±2	87±3	79±2	83±4	0.00936341	46.1861	10.0862	1	0	1	0	0	0		100
10839405	Dut	Dut	deoxyuridine triphosphatase	391.438	24		372.132	406.031	394.148	397.316	10.3414	15.8695	19.5787	17.8108	4.22185	6.47871	7.99298	7.27125	372±4	406±6	394±8	397±7	0.015666	265.519	24.1834	1	0	1	0	0	0		100
10844229	Dyt1	Dyt1	dystonia 1	162.302	24		148.035	170.139	173.019	160.056	4.81476	9.67202	11.1369	9.59844	1.96562	3.94858	4.54662	3.91855	148±2	170±4	173±5	160±4	0.000620379	82.6792	13.4949	1	1	0	0	0	0		100
10705631	Ech1	Ech1	enoyl CoA hydratase 1, peroxisomal	760.09	24		699.39	785.754	757.008	753.336	30.1837	49.1421	28.6291	31.3371	12.3225	20.0622	11.6878	12.7933	699±12	786±20	757±12	753±13	0.00474848	1222.28	51.8867	1	1	1	0	0	0		100
10794779	Eci3	Eci3	enoyl-Coenzyme A delta isomerase 3	226.348	24		174.376	265.915	219.284	231.686	15.0641	67.2334	14.196	44.219	6.14989	27.4479	5.79549	18.0523	174±6	266±27	219±6	232±18	0.00983536	1578.96	58.9734	1	0	0	0	0	0		100
10918838	Eef1a1	Eef1a1	eukaryotic translation elongation factor 1 alpha 1	9922.22	24		9615.98	9934.02	9849.49	9992.53	166.004	208.392	196.784	112.284	67.7708	85.0758	80.3367	45.8396	9616±68	9934±85	9849±80	9993±46	0.00733898	29902.8	256.641	1	0	1	0	0	0		100
10904668	Eef1d	Eef1d	eukaryotic translation elongation factor 1 delta (guanine nucleotide exchange protein)	529.944	24		500.528	538.078	539.114	524.814	15.5873	7.02068	20.0399	12.6888	6.36351	2.86618	8.18124	5.18017	501±6	538±3	539±8	525±5	0.000893576	222.368	22.1313	1	1	1	0	0	0		100
10710494	Eef2k	Eef2k	eukaryotic elongation factor-2 kinase	208.488	24		186.233	225.029	206.132	213.553	5.23164	23.1937	8.02944	11.9585	2.13581	9.4688	3.27801	4.88204	186±2	225±9	206±3	214±5	0.000860374	175.054	19.6362	1	1	1	0	0	0		100
10870163	Efcab7	Efcab7	EF-hand calcium binding domain 7	88.9563	24		79.328	97.4231	87.4917	87.76	5.48561	9.93605	8.99702	12.3988	2.23949	4.05638	3.67302	5.06179	79±2	97±4	87±4	88±5	0.0430231	90.4602	14.1156	1	0	0	0	0	0		100
10784199	Efha1	Efha1	EF-hand domain family, member A1	522.71	24		512.817	531.296	532.55	518.975	5.47712	15.4574	1.95834	7.03431	2.23603	6.31047	0.79949	2.87174	513±2	531±6	533±1	519±3	0.00321931	76.0261	12.9405	1	1	0	0	0	-1		100
10856232	Eif2ak3	Eif2ak3	eukaryotic translation initiation factor 2 alpha kinase 3	435.254	24		420.343	448.925	439.908	435.805	14.1287	16.9696	7.43728	13.3194	5.76802	6.9278	3.03626	5.43762	420±6	449±7	440±3	436±5	0.0141541	174.398	19.5994	1	0	0	0	0	0		100
10720299	Eif3k	Eif3k	eukaryotic translation initiation factor 3, subunit K	631.725	24		609.975	637.884	652.563	622.733	7.00256	18.3721	20.3169	18.8199	2.85878	7.50038	8.29432	7.68321	610±3	638±8	653±8	623±8	0.00216849	285.797	25.0899	1	1	0	0	0	-1		100
10922701	Eif5b	Eif5b	eukaryotic translation initiation factor 5B	1376.31	24		1330.53	1396.08	1412.57	1362.01	37.5064	23.3119	41.7804	39.6544	15.3119	9.51702	17.0568	16.1888	1331±15	1396±10	1413±17	1362±16	0.00551717	1357.78	54.6871	1	1	0	0	0	0		100
10781690	Elf1	Elf1	E74-like factor 1	424.722	24		363.031	440.47	425.071	408.445	17.4925	17.0977	34.8966	32.141	7.1413	6.9801	14.2465	13.1215	363±7	440±7	425±14	408±13	0.000773739	734.387	40.2192	1	1	1	0	0	0		100
10823075	Elf2	Elf2	E74-like factor 2	345.576	24		314.148	356.866	353.099	341.086	9.15932	17.6937	20.6371	11.32	3.73928	7.22344	8.42505	4.62139	314±4	357±7	353±8	341±5	0.000566901	233.784	22.6923	1	1	1	0	0	0		100
10819305	Emcn	Emcn	endomucin	186.308	24		163.059	203.994	181.882	191.025	22.6842	20.6241	6.10937	15.9651	9.26077	8.41977	2.49414	6.51772	163±9	204±8	182±2	191±7	0.00700021	301.859	25.7853	1	0	1	0	0	0		100
10704758	Eml2	Eml2	echinoderm microtubule associated protein like 2	695.04	24		642.626	711.51	727.035	721.938	13.4154	76.0371	29.2641	39.6381	5.47683	31.042	11.947	16.1822	643±5	712±31	727±12	722±16	0.0113791	1903.38	64.7491	1	1	1	0	0	0		100
10715258	Entpd1	Entpd1	ectonucleoside triphosphate diphosphohydrolase 1	346.79	24		303.794	358.458	347.352	317.934	10.0039	60.4629	26.2723	23.9225	4.08406	24.6839	10.7256	9.76632	304±4	358±25	347±11	318±10	0.0466879	1128.21	49.8501	1	0	0	0	0	0		100
10897919	Ep300	Ep300	E1A binding protein p300	974.387	24		938.638	995.054	993.676	961.413	18.9731	37.8681	29.5311	27.7258	7.74574	15.4596	12.056	11.319	939±8	995±15	994±12	961±11	0.00892013	828.416	42.7164	1	1	0	0	0	0		100
10758705	Erp29	Erp29	endoplasmic reticulum protein 29	239.308	24		219.709	245.404	254.202	226.956	8.99591	31.1565	8.26109	10.1473	3.67256	12.7196	3.37258	4.14262	220±4	245±13	254±3	227±4	0.00654825	270.716	24.419	1	1	0	0	0	-1		100
10764034	Etnk2	Etnk2	ethanolamine kinase 2	162.773	24		151.867	169.489	162.951	163.012	8.6516	12.0367	5.93746	9.24733	3.532	4.91396	2.42396	3.7752	152±4	169±5	163±2	163±4	0.030695	81.9795	13.4377	1	0	0	0	0	0		100
10880381	Eya3	Eya3	eyes absent homolog 3 (Drosophila)	765.114	24		722.892	770.691	783.715	760.159	18.3451	30.2663	29.032	29.8948	7.48937	12.3562	11.8523	12.2045	723±7	771±12	784±12	760±12	0.00684547	738.405	40.3291	1	1	0	0	0	0		100
10765600	F11r	F11r	F11 receptor	103.042	24		82.2276	120.846	101.291	100.75	9.13459	30.5989	12.0515	13.7175	3.72918	12.4919	4.92002	5.60013	82±4	121±12	101±5	101±6	0.0160112	306.811	25.996	1	0	0	0	0	0		100
10748396	Falz	Falz	fetal Alzheimer antigen	786.184	24		764.62	806.216	797.467	776.678	18.6848	30.9663	18.2928	18.1823	7.62802	12.642	7.468	7.4229	765±8	806±13	797±7	777±7	0.0174167	468.809	32.1343	1	1	0	0	0	0		100
10822107	Fam105a	Fam105a	family with sequence similarity 105, member A	261.71	24		209.378	261.262	250.719	228.657	11.5932	51.5919	22.4222	24.1798	4.73289	21.0623	9.15383	9.87135	209±5	261±21	251±9	229±10	0.0381259	881.894	44.0736	1	0	0	0	0	0		100
10794394	Fam120a	Fam120a	family with sequence similarity 120A	1622.32	24		1569.83	1635.8	1636.91	1630.8	35.9466	60.7593	31.6433	40.9867	14.6751	24.8049	12.9183	16.7327	1570±15	1636±25	1637±13	1631±17	0.0387576	1822.82	63.364	1	1	0	0	0	0		100
10787303	Fam125a	Fam125a	family with sequence similarity 125, member A	282.1	24		264.887	294.738	282.169	279.161	8.95755	12.8174	11.6918	15.5567	3.65691	5.23267	4.77314	6.35101	265±4	295±5	282±5	279±6	0.00777291	155.362	18.4988	1	0	0	0	0	0		100
10764661	Fam129a	Fam129a	family with sequence similarity 129, member A	67.8466	24		55.6002	71.2688	69.2871	68.0441	3.03836	6.38514	3.48732	4.38991	1.24041	2.60672	1.42369	1.79217	56±1	71±3	69±1	68±2	2.81536e-05	19.2843	6.51738	1	1	1	0	0	0		100
10803737	Fam13b	Fam13b	family with sequence similarity 13, member B	766.354	24		721.875	805.39	752.99	761.781	37.3212	37.5569	34.5486	50.2178	15.2363	15.3325	14.1044	20.5013	722±15	805±15	753±14	762±21	0.0246979	1641.24	60.1253	1	0	0	0	0	0		100
10741518	Fam173a	Fam173a	family with sequence similarity 173, member A	166.697	24		160.141	176.261	169.965	162.507	11.8592	8.21185	9.20293	8.55731	4.84149	3.35247	3.75708	3.49351	160±5	176±3	170±4	163±3	0.047743	92.7656	14.2943	1	0	0	0	0	0		100
10729397	Fam189a2	Fam189a2	family with sequence similarity 189, member A2	273.372	24		244.195	285.502	285.995	275.626	9.9872	24.051	7.87589	14.9006	4.07726	9.8188	3.21532	6.08312	244±4	286±10	286±3	276±6	0.000324886	222.78	22.1518	1	1	1	0	0	0		100
10877905	Fam29a	Fam29a	family with sequence similarity 29, member A	301.329	24		284.311	308.674	301.405	298.799	13.001	16.5605	11.5889	12.3496	5.30764	6.76081	4.73114	5.04169	284±5	309±7	301±5	299±5	0.042136	177.695	19.7837	1	0	0	0	0	0		100
10936055	Fam3a	Fam3a	family with sequence similarity 3, member A	280.135	24		261.672	297.638	285.694	278.684	13.7866	10.5434	19.0998	15.2789	5.62835	4.30433	7.79748	6.2376	262±6	298±4	286±8	279±6	0.00709586	230.855	22.5497	1	1	0	0	0	0		100
10805640	Fam96b	Fam96b	family with sequence similarity 96, member B	589.977	24		557.224	598.843	626.665	581.258	13.4506	23.2459	21.9131	25.3992	5.49117	9.49011	8.946	10.3692	557±5	599±9	627±9	581±10	0.000187996	457.506	31.7445	1	1	0	0	0	-1		100
10898315	Fbln1	Fbln1	fibulin 1	439.018	24		396.312	453.651	423.329	454.764	13.1077	35.5315	21.3738	33.5043	5.35121	14.5057	8.7258	13.6781	396±5	454±15	423±9	455±14	0.0040472	726.626	40.0061	1	0	1	0	0	0		100
10903896	Fbxo32	Fbxo32	F-box protein 32	465.467	24		385.5	480.667	500.718	491.562	26.1032	73.8321	45.8123	20.0137	10.6566	30.1418	18.7028	8.17056	386±11	481±30	501±19	492±8	0.000836232	1984.64	66.1168	1	1	1	0	0	0		100
10769825	Fcer1g	Fcer1g	Fc fragment of IgE, high affinity I, receptor for; gamma polypeptide	1048.76	24		663.13	1126.93	1018.68	987.649	56.21	413.733	99.1975	94.2379	22.9476	168.906	40.4972	38.4725	663±23	1127±169	1019±40	988±38	0.00701292	41794.9	303.412	1	1	1	0	0	0		100
10769797	Fcgr2a	Fcgr2a	Fc fragment of IgG, low affinity IIa, receptor (CD32)	776.633	24		530.789	769.278	732.815	721.769	39.4956	130.938	61.2491	113.764	16.124	53.4551	25.0049	46.4438	531±16	769±53	733±25	722±46	0.00125256	8412.98	136.127	1	1	1	0	0	0		100
10769771	Fcgr2b	Fcgr2b	Fc fragment of IgG, low affinity IIb, receptor (CD32)	244.816	24	Up	105.277	253.588	199.051	187.221	4.94182	136.157	25.8337	13.7103	2.01749	55.5858	10.5466	5.59719	105±2	254±56	199±11	187±6	0.00958502	4134.4	95.4282	1	0	0	0	0	0		100
10721667	Fcgrt	Fcgrt	Fc fragment of IgG, receptor, transporter, alpha	110.39	24		98.6971	118.807	109.275	108.204	6.8864	10.4157	5.59411	8.34791	2.81136	4.25219	2.28379	3.40802	99±3	119±4	109±2	108±3	0.00475742	61.893	11.6759	1	0	0	0	0	0		100
10782852	Fermt2	Fermt2	fermitin family member 2	721.065	24		683.581	731.827	724.252	711.49	18.8061	22.9897	28.8191	9.95838	7.67757	9.3855	11.7653	4.06549	684±8	732±9	724±12	711±4	0.00575822	449	31.4481	1	1	0	0	0	0		100
10726172	Fgfr2	Fgfr2	fibroblast growth factor receptor 2	1527.08	24		1356.41	1587.9	1560.31	1621.48	29.4442	161.709	81.2382	140.895	12.0206	66.0175	33.1654	57.5201	1356±12	1588±66	1560±33	1621±58	0.00294686	12694.2	167.214	1	1	1	0	0	0		100
10757448	Fis1	Fis1	fission 1 (mitochondrial outer membrane) homolog (S. cerevisiae)	469.673	24		418.635	492.719	494.885	477.521	26.7476	38.5083	52.5972	15.8289	10.9197	15.721	21.4727	6.46212	419±11	493±16	495±21	478±6	0.00550966	1294.41	53.3958	1	1	1	0	0	0		100
10854139	Flnc	Flnc	filamin C, gamma	156.201	24		137.666	156.26	154.369	151.696	3.44604	8.26211	4.87291	11.7674	1.40684	3.37299	1.98936	4.80401	138±1	156±3	154±2	152±5	0.00254529	60.1847	11.5137	1	1	1	0	0	0		100
10822583	Fndc3b	Fndc3b	fibronectin type III domain containing 3B	393.882	24		361.318	416.909	383.894	389.637	11.8213	27.0626	25.0278	27.7418	4.82604	11.0483	10.2175	11.3256	361±5	417±11	384±10	390±11	0.0093824	558.329	35.0684	1	0	0	0	0	0		100
10723523	Folh1	Folh1	folate hydrolase 1	544.187	24		516.222	560.296	573.52	538.292	14.8277	37.185	18.1677	20.5278	6.05337	15.1807	7.41695	8.38045	516±6	560±15	574±7	538±8	0.00256233	546.709	34.7016	1	1	0	0	0	-1		100
10823127	Frem2	Frem2	Fras1 related extracellular matrix protein 2	131.8	24		116.932	150.294	129.863	135.615	8.72077	23.6289	7.58955	14.8982	3.56024	9.64646	3.09842	6.08218	117±4	150±10	130±3	136±6	0.0104629	211.124	21.5645	1	0	0	0	0	0		100
10818633	Frrs1	Frrs1	ferric-chelate reductase 1	134.058	24		107.453	151.426	133.557	131.978	9.57175	17.0756	11.0282	19.6433	3.90765	6.97108	4.50224	8.01933	107±4	151±7	134±5	132±8	0.000997201	219.041	21.9651	1	1	1	0	0	0		100
10872743	Ftl	Ftl	ferritin, light polypeptide	6240.83	24		5786.71	6231.95	6266.62	6211.91	145.853	175.7	141.28	201.44	59.5443	71.729	57.6774	82.2375	5787±60	6232±72	6267±58	6212±82	0.000229838	28028.3	248.467	1	1	1	0	0	0		100
10872940	Fuca1	Fuca1	fucosidase, alpha-L- 1, tissue	555.584	24		472.632	600.772	519.705	562.63	22.3238	92.4885	27.0356	90.7987	9.11367	37.7583	11.0372	37.0684	473±9	601±38	520±11	563±37	0.0239609	4293.94	97.2521	1	0	0	0	0	0		100
10701817	Fuca2	Fuca2	fucosidase, alpha-L- 2, plasma	369.526	24		333.599	396.75	378.81	377.357	23.8232	32.4149	16.8899	35.4972	9.72577	13.2333	6.89526	14.4917	334±10	397±13	379±7	377±14	0.00809217	777.221	41.3755	1	1	1	0	0	0		100
10932181	Fundc1	Fundc1	FUN14 domain containing 1	365.173	24		342.949	377.325	378.712	362.377	18.6543	26.2668	15.2697	18.6214	7.61558	10.7234	6.23382	7.60215	343±8	377±11	379±6	362±8	0.0202825	389.436	29.2879	1	1	0	0	0	0		100
10720878	Fxyd1	Fxyd1	FXYD domain-containing ion transport regulator 1	2394.49	24		1878.56	2744.52	2300.85	2542.45	71.0696	604.712	89.7839	305.085	29.014	246.873	36.6541	124.551	1879±29	2745±247	2301±37	2542±125	0.00169647	104929	480.749	1	0	1	0	0	0		100
10708745	Gab2	Gab2	GRB2-associated binding protein 2	313.754	24		269.298	326.903	329.813	318.893	18.6683	22.9211	20.9148	19.3471	7.62129	9.35749	8.53845	7.89842	269±8	327±9	330±9	319±8	0.000170238	415.933	30.2679	1	1	1	0	0	0		100
10891502	Galc	Galc	galactosylceramidase	263.552	24		233.848	270.994	256.532	259.783	13.9961	11.4139	16.4762	18.3401	5.71389	4.65972	6.72638	7.4873	234±6	271±5	257±7	260±7	0.00571952	238.931	22.9407	1	0	1	0	0	0		100
10882496	Galm	Galm	galactose mutarotase (aldose 1-epimerase)	451.712	24		412.972	479.015	467.217	452.171	18.4593	32.0963	31.8051	39.5983	7.53599	13.1033	12.9844	16.1659	413±8	479±13	467±13	452±16	0.011873	985.387	46.588	1	1	0	0	0	0		100
10808774	Galnt2	Galnt2	UDP-N-acetyl-alpha-D-galactosamine:polypeptide N-acetylgalactosaminyltransferase 2 (GalNAc-T2)	520.053	24		491.683	536.972	530.56	514.059	15.7233	30.1122	30.9715	29.3897	6.41899	12.2933	12.6441	11.9983	492±6	537±12	531±13	514±12	0.0482181	735.685	40.2547	1	0	0	0	0	0		100
10787666	Gatad2a	Gatad2a	GATA zinc finger domain containing 2A	423.801	24		398.213	427.075	437.887	425.625	12.7421	11.8246	15.8803	7.08176	5.20196	4.82738	6.48312	2.89112	398±5	427±5	438±6	426±3	0.000182422	151.725	18.281	1	1	1	0	0	0		100
10819489	Gbp5	Gbp5	guanylate binding protein 5	112.527	24		87.9842	124.25	115.346	106.786	9.71829	20.0281	10.6985	12.1489	3.96748	8.17644	4.36764	4.95978	88±4	124±8	115±4	107±5	0.00156229	178.263	19.8153	1	1	0	0	0	0		100
10729209	Gcnt1	Gcnt1	glucosaminyl (N-acetyl) transferase 1, core 2	54.8024	21		41.8895	61.8631	53.9561	52.668	7.72593	16.7462	8.7199	4.71975	3.1541	6.83659	3.55988	1.92683	42±3	62±7	54±4	53±2	0.0291958	100.618	14.8871	1	0	0	0	0	0		100
10811293	Gcsh	Gcsh	glycine cleavage system protein H (aminomethyl carrier)	539.005	24		509.427	557.746	547.951	540.606	28.8182	34.688	11.9792	31.488	11.765	14.1613	4.89049	12.8549	509±12	558±14	548±5	541±13	0.0452176	770.55	41.1975	1	0	0	0	0	0		100
10747948	Gfap	Gfap	glial fibrillary acidic protein	2752.58	24		2059.75	2794.55	2749.98	2607.72	159.49	425.012	212.203	158.23	65.1116	173.511	86.6314	64.5973	2060±65	2795±174	2750±87	2608±65	0.000263943	63161.2	372.989	1	1	1	0	0	0		100
10815815	Gfm1	Gfm1	G elongation factor, mitochondrial 1	503.677	24		482.753	522.866	511.752	500.045	14.0898	23.3822	19.785	8.89583	5.75212	9.54574	8.07719	3.63171	483±6	523±10	512±8	500±4	0.00608566	291.18	25.3251	1	1	0	0	0	0		100
10844695	Ggta1p	Ggta1p	glycoprotein, alpha-galactosyltransferase 1,3	110.458	24		83.5407	116.633	107.575	104.176	5.58361	20.3078	15.5723	7.46667	2.2795	8.29061	6.35735	3.04825	84±2	117±8	108±6	104±3	0.0035419	173.512	19.5495	1	1	1	0	0	0		100
10719394	Gipr	Gipr	gastric inhibitory polypeptide receptor	127.052	24		102.791	138.517	139.154	129.687	11.7011	13.7836	7.21026	7.36808	4.77697	5.62714	2.94358	3.008	103±5	139±6	139±3	130±3	1.68316e-05	103.996	15.1349	1	1	1	0	0	0		100
10902313	Glipr1	Glipr1	GLI pathogenesis-related 1	60.3871	24		46.1831	58.7691	56.8472	57.6804	3.59223	6.012	8.21321	3.3306	1.46652	2.45439	3.35303	1.35971	46±1	59±2	57±3	58±1	0.00377088	31.6761	8.35289	1	1	1	0	0	0		100
10832115	Glo1	Glo1	glyoxalase 1	2000.72	24		1897.8	2103.37	2012.7	1969.42	67.9612	148.359	64.4574	69.7228	27.7451	60.5675	26.3146	28.4642	1898±28	2103±61	2013±26	1969±28	0.0109143	8221.88	134.573	1	0	0	0	0	0		100
10787351	Glt25d1	Glt25d1	glycosyltransferase 25 domain containing 1	271.816	24		253.903	280.537	270.618	262.304	7.57879	17.6205	12.771	15.8581	3.09403	7.19354	5.21376	6.47405	254±3	281±7	271±5	262±6	0.0281128	189.58	20.4346	1	0	0	0	0	0		100
10759089	Gltp	Gltp	glycolipid transfer protein	478.799	24		410.058	480.298	504.312	490.09	18.3472	36.1815	31.2383	35.7992	7.49023	14.771	12.753	14.615	410±7	480±15	504±13	490±15	0.000209791	958.242	45.9418	1	1	1	0	0	0		100
10920109	Gnai2	Gnai2	guanine nucleotide binding protein (G protein), alpha inhibiting activity polypeptide 2	2044.82	24		1930.44	2051.48	2054.78	2054.67	27.7392	64.7411	22.0851	52.0546	11.3245	26.4304	9.01621	21.2512	1930±11	2051±26	2055±9	2055±21	0.000145299	1926.32	65.1381	1	1	1	0	0	0		100
10733039	Gnb2l1	Gnb2l1	guanine nucleotide binding protein (G protein), beta polypeptide 2 like 1	1687.75	24		1585.06	1707.44	1687.32	1665.28	28.8156	60.6498	70.5372	34.2205	11.7639	24.7602	28.7967	13.9705	1585±12	1707±25	1687±29	1665±14	0.0036952	2610.42	75.8274	1	1	1	0	0	0		100
10895705	Gns	Gns	glucosamine (N-acetyl)-6-sulfatase	1077.96	24		998	1087.12	1044.44	1051.3	31.8643	38.8529	32.2001	39.7633	13.0085	15.8616	13.1456	16.2333	998±13	1087±16	1044±13	1051±16	0.00530627	1273.93	52.9717	1	0	1	0	0	0		100
10823742	Golim4	Golim4	golgi integral membrane protein 4	523.331	24		487.923	553.518	520.98	509.716	19.507	42.6231	17.4183	44.8734	7.96369	17.4008	7.11097	18.3195	488±8	554±17	521±7	510±18	0.0296722	1092.35	49.0514	1	0	0	0	0	0		100
10855449	Gpnmb	Gpnmb	glycoprotein (transmembrane) nmb	466.991	24		262.388	369.205	362.13	356.957	10.1185	38.3812	35.716	15.067	4.13086	15.6691	14.581	6.15108	262±4	369±16	362±15	357±6	3.7078e-06	732.506	40.1677	1	1	1	0	0	0		100
10822663	Gpr160	Gpr160	G protein-coupled receptor 160	72.8667	24		59.3202	80.7384	72.518	66.9118	3.87377	22.28	3.34383	6.26088	1.58146	9.09578	1.36511	2.55599	59±2	81±9	73±1	67±3	0.0300795	121.712	16.3733	1	0	0	0	0	0		100
10786028	Gpr183	Gpr183	G protein-coupled receptor 183	109.759	24		77.7933	107.822	107.281	91.196	8.62522	29.8232	15.3092	9.847	3.52123	12.1753	6.24994	4.02002	78±4	108±12	107±6	91±4	0.0217861	294.017	25.4482	1	1	0	0	0	0		100
10936742	Gpr34	Gpr34	G protein-coupled receptor 34	252.936	24		184.517	234.187	235.136	241.001	23.7775	42.6496	8.17239	24.5626	9.70712	17.4116	3.33636	10.0277	185±10	234±17	235±3	241±10	0.00541721	708.07	39.492	1	1	1	0	0	0		100
10738576	Grn	Grn	granulin	634.956	24	Up	507.49	643.44	591.729	559.939	17.7049	145.507	41.781	20.8194	7.22799	59.4032	17.057	8.49949	507±7	643±59	592±17	560±8	0.0356587	5113.29	106.126	1	0	0	0	0	0		100
10708230	Hddc3	Hddc3	HD domain containing 3	314.051	24		291.951	324.894	332.19	306.483	8.3532	28.8984	11.1542	11.2674	3.41018	11.7977	4.55369	4.59991	292±3	325±12	332±5	306±5	0.00169688	260.326	23.9458	1	1	0	0	0	-1		100
10889877	Heatr5a	Heatr5a	HEAT repeat containing 5A	223.309	24		204.177	231.919	220.484	220.726	9.64881	11.2689	12.4742	12.0973	3.93911	4.60052	5.09256	4.9387	204±4	232±5	220±5	221±5	0.00649287	130.695	16.9668	1	0	0	0	0	0		100
10915826	Herpud2	Herpud2	HERPUD family member 2	673.401	24		644.493	690.28	674.276	671.026	15.6793	46.7165	13.5202	11.6157	6.40103	19.0719	5.51962	4.7421	644±6	690±19	674±6	671±5	0.0418035	607.765	36.588	1	0	0	0	0	0		100
10820693	Hexb	Hexb	hexosaminidase B	1141.65	24		944.727	1115.41	1120.03	1120.64	17.5475	129.856	26.2606	77.9822	7.16375	53.0133	10.7208	31.8361	945±7	1115±53	1120±11	1121±32	0.000994311	5412.82	109.19	1	1	1	0	0	0		100
10814347	Hey1	Hey1	hairy/enhancer-of-split related with YRPW motif 1	368.346	24		341.619	385.396	382.279	363.224	12.6061	23.4693	17.6331	28.221	5.14642	9.58131	7.19868	11.5212	342±5	385±10	382±7	363±12	0.00845239	449.187	31.4546	1	1	0	0	0	0		100
10876434	Hint2	Hint2	histidine triad nucleotide binding protein 2	263.869	24		247.569	273.958	275.051	263.063	14.374	6.25466	12.6787	12.9496	5.86816	2.55346	5.17605	5.28665	248±6	274±3	275±5	263±5	0.00359748	149.039	18.1185	1	1	0	0	0	0		100
10761758	Hip1r	Hip1r	huntingtin interacting protein 1 related	225.111	24		212.449	230.175	238.264	225.175	9.72501	13.1375	10.2439	12.8689	3.97022	5.36336	4.18205	5.2537	212±4	230±5	238±4	225±5	0.00817447	132.42	17.0784	1	1	0	0	0	0		100
10825582	Hipk1	Hipk1	homeodomain interacting protein kinase 1	1304.54	24		1253.25	1360.1	1293.11	1299.94	13.2482	97.0721	20.6494	53.651	5.40855	39.6295	8.43007	21.9029	1253±5	1360±40	1293±8	1300±22	0.0322248	2899.67	79.9181	1	0	0	0	0	0		100
10861997	Hipk2	Hipk2	homeodomain interacting protein kinase 2	3276.03	24		3013.69	3412.58	3341.71	3361.97	95.5415	138.517	159.774	86.9127	39.0046	56.5491	65.2273	35.482	3014±39	3413±57	3342±65	3362±35	8.7833e-05	15147.1	182.657	1	1	1	0	0	0		100
10817539	Hist2h2bb	Hist2h2bb	histone cluster 2, H2bb	320.053	24		283.462	337.136	330.197	316.126	18.0157	37.7208	13.2687	11.9427	7.35487	15.3994	5.41694	4.87557	283±7	337±15	330±5	316±5	0.00237112	468.825	32.1348	1	1	1	0	0	0		100
10880408	Hmgn2	Hmgn2	high mobility group nucleosomal binding domain 2	790.696	24		718.996	800.866	830.491	772.581	52.0142	50.3196	12.9616	20.1715	21.2347	20.5429	5.29155	8.23499	719±21	801±21	830±5	773±8	0.000456523	1396.32	55.4579	1	1	0	0	0	-1		100
10919010	Hmgn3	Hmgn3	high mobility group nucleosomal binding domain 3	565.96	24		542.019	591.944	580.441	562.536	21.9764	30.4305	11.9659	23.5193	8.97184	12.4232	4.88505	9.60171	542±9	592±12	580±5	563±10	0.00801525	505.293	33.3613	1	1	0	0	0	0		100
10806122	Hmox1	Hmox1	heme oxygenase (decycling) 1	96.4025	24		79.1494	94.6367	83.2546	91.0465	6.40128	9.54742	6.90615	12.3913	2.61331	3.89772	2.81942	5.05874	79±3	95±4	83±3	91±5	0.0396105	82.9312	13.5154	1	0	0	0	0	0		100
10862842	Hpgds	Hpgds	hematopoietic prostaglandin D synthase	89.6175	24		66.6058	87.0931	90.8869	82.303	5.72461	13.3796	6.41496	8.27819	2.33706	5.46219	2.6189	3.37956	67±2	87±5	91±3	82±3	0.000659623	75.1742	12.8678	1	1	1	0	0	0		100
10771389	Hpse	Hpse	heparanase	72.2817	24		60.0727	75.3187	70.3253	73.615	5.83757	11.3993	9.60564	7.63129	2.38318	4.65376	3.92148	3.11546	60±2	75±5	70±4	74±3	0.034181	75.9311	12.9324	1	0	1	0	0	0		100
10883503	Hs1bp3	Hs1bp3	HCLS1 binding protein 3	248.62	24		233.959	257.006	256.623	245.119	12.6374	14.3433	8.19397	16.0338	5.15918	5.85564	3.34518	6.54575	234±5	257±6	257±3	245±7	0.0216802	170.661	19.3882	1	1	0	0	0	0		100
10759241	Hscb	Hscb	HscB iron-sulfur cluster co-chaperone homolog (E. coli)	187.373	24		170.165	196.884	195.498	183.97	10.0793	18.9413	11.5609	9.64877	4.11486	7.73277	4.71974	3.93909	170±4	197±8	195±5	184±4	0.00694097	161.938	18.8863	1	1	0	0	0	0		100
10811415	Hsdl1	Hsdl1	hydroxysteroid dehydrogenase like 1	173.02	24		164.783	181.818	178.814	171.383	9.77622	13.116	10.6444	6.49598	3.99112	5.35459	4.34557	2.65197	165±4	182±5	179±4	171±3	0.0449907	102.289	15.0102	1	0	0	0	0	0		100
10869267	Hsdl2	Hsdl2	hydroxysteroid dehydrogenase like 2	889.917	24		849.369	888.443	888.907	903.115	22.7451	34.2398	10.2306	27.9863	9.28566	13.9783	4.17663	11.4253	849±9	888±14	889±4	903±11	0.0088453	616.613	36.8534	1	1	1	0	0	0		100
10923345	Hspe1	Hspe1	heat shock protein 1 (chaperonin 10)	625.422	24		586.089	632.656	646.548	632.663	40.2856	24.023	20.0699	10.4908	16.4465	9.80735	8.19349	4.28285	586±16	633±10	647±8	633±4	0.0043847	683.544	38.802	1	1	1	0	0	0		100
10839174	Hypk	Hypk	Huntingtin interacting protein K	316.206	24		294.771	327.658	333.223	314.355	20.4082	21.6512	18.8336	18.3238	8.33159	8.83908	7.68877	7.48068	295±8	328±9	333±8	314±7	0.0163404	389.995	29.3089	1	1	0	0	0	0		100
10908319	Icam1	Icam1	intercellular adhesion molecule 1	174.322	24		160.597	174.544	163.434	173.49	5.78381	4.11571	8.59618	11.7151	2.36123	1.68023	3.50938	4.78267	161±2	175±2	163±4	173±5	0.02011	67.932	12.2323	1	0	1	0	0	0		100
10832232	Icoslg	Icoslg	inducible T-cell co-stimulator ligand	128.152	24		111.275	140.265	122.425	122.441	4.3109	22.4278	2.55318	13.458	1.75992	9.15612	1.04233	5.49421	111±2	140±9	122±1	122±5	0.0116484	160.165	18.7825	1	0	0	0	0	0		100
10827349	Ifi44	Ifi44	interferon-induced protein 44	131.168	24		114.679	139.507	128.682	125.119	9.24847	16.6469	8.16207	9.71172	3.77567	6.79607	3.33215	3.96479	115±4	140±7	129±3	125±4	0.0131942	123.202	16.4733	1	0	0	0	0	0		100
10845708	Ifih1	Ifih1	interferon induced with helicase C domain 1	131.15	24		112.622	131.157	133.304	127.676	12.0605	13.7934	8.02118	10.9722	4.92369	5.63114	3.27463	4.47939	113±5	131±6	133±3	128±4	0.021979	126.945	16.7217	1	1	0	0	0	0		100
10750200	Ifnar1	Ifnar1	interferon (alpha, beta and omega) receptor 1	685.839	24		646.773	687.435	678.002	676.703	21.1346	34.2341	21.6123	16.1894	8.62818	13.976	8.82319	6.60928	647±9	687±14	678±9	677±7	0.0463912	556.168	35.0005	1	0	0	0	0	0		100
10707889	Igf1r	Igf1r	insulin-like growth factor 1 receptor	804.242	24		745.349	844.249	814.895	816.79	20.0719	38.5076	34.609	44.767	8.19433	15.7207	14.1291	18.2761	745±8	844±16	815±14	817±18	0.00116009	1260.8	52.6979	1	1	1	0	0	0		100
10733790	Igtp	Igtp	interferon gamma induced GTPase	108.637	24		95.9731	110.951	108.239	106.039	6.74619	8.23078	7.08264	7.02423	2.75412	3.3602	2.89148	2.86763	96±3	111±3	108±3	106±3	0.0130807	52.424	10.7457	1	1	0	0	0	0		100
10774253	Ikzf1	Ikzf1	IKAROS family zinc finger 1	100.446	24		75.3861	95.7413	88.5847	94.1606	3.79411	22.0372	6.91669	10.1255	1.54894	8.99667	2.82373	4.13373	75±2	96±9	89±3	94±4	0.0391238	145.599	17.9081	1	0	1	0	0	0		100
10858315	Il17ra	Il17ra	interleukin 17 receptor A	133.974	24		112.242	130.61	138.401	126.924	7.83239	15.3054	15.843	7.48766	3.19756	6.24839	6.4679	3.05682	112±3	131±6	138±6	127±3	0.0108891	146.268	17.9492	1	1	0	0	0	0		100
10909874	Il18	Il18	interleukin 18	119.442	24	Up	92.0063	122.412	123.937	109.487	2.40065	14.3572	10.814	9.7244	0.980061	5.86129	4.41479	3.96997	92±1	122±6	124±4	109±4	8.76966e-05	100.571	14.8836	1	1	1	0	0	0		100
10724131	Il18bp	Il18bp	interleukin 18 binding protein	204.82	24		193.481	225.329	203.443	202.24	7.90716	21.5331	18.7447	13.1313	3.22809	8.79086	7.65249	5.36082	193±3	225±9	203±8	202±5	0.0258489	251.91	23.5556	1	0	0	0	0	0		100
10813007	Il6st	Il6st	interleukin 6 signal transducer	1412.42	24		1325.24	1415.7	1402.92	1407.49	21.4389	49.3434	31.9336	66.237	8.7524	20.1443	13.0368	27.0411	1325±9	1416±20	1403±13	1407±27	0.00983651	2056.46	67.3024	1	1	1	0	0	0		100
10925060	Inpp5d	Inpp5d	inositol polyphosphate-5-phosphatase D	165.148	24		123.813	170.897	156.372	149.726	6.30065	33.1161	14.5583	8.43473	2.57223	13.5196	5.9434	3.44346	124±3	171±14	156±6	150±3	0.00248959	315.823	26.375	1	1	0	0	0	0		100
10756229	Insr	Insr	insulin receptor	375.59	24		357.425	400.016	374.739	376.3	9.9535	24.7668	15.6641	20.9128	4.0635	10.111	6.39484	8.53763	357±4	400±10	375±6	376±9	0.0105659	334.868	27.1586	1	0	0	0	0	0		100
10918147	Iqch	Iqch	IQ motif containing H	95.0388	24		85.5132	98.8933	92.203	94.4696	4.49704	4.10699	5.28581	11.2968	1.83591	1.67667	2.15792	4.6119	86±2	99±2	92±2	94±5	0.0360631	49.8092	10.4743	1	0	0	0	0	0		100
10902662	Irak3	Irak3	interleukin-1 receptor-associated kinase 3	130.958	24		112.879	136.955	134.397	125.753	6.52358	14.0032	11.4043	6.09589	2.66324	5.71679	4.65579	2.48863	113±3	137±6	134±5	126±2	0.00229634	96.4861	14.5782	1	1	0	0	0	0		100
10898862	Irak4	Irak4	interleukin-1 receptor-associated kinase 4	105.791	24		93.5645	105.28	105.937	104.337	3.7748	11.9802	5.15285	8.31841	1.54106	4.89092	2.10364	3.39597	94±2	105±5	106±2	104±3	0.0384936	59.1626	11.4155	1	1	0	0	0	0		100
10733553	Irf1	Irf1	interferon regulatory factor 1	99.0041	24		90.0582	105.249	96.3563	98.4053	7.15678	5.39869	8.16294	9.46994	2.92174	2.204	3.33251	3.86609	90±3	105±2	96±3	98±4	0.0347674	60.7499	11.5676	1	0	0	0	0	0		100
10791640	Irf2	Irf2	interferon regulatory factor 2	464.322	24		423.03	456.529	481.954	466.927	21.1125	12.5795	20.2571	15.9912	8.61914	5.13558	8.26993	6.52839	423±9	457±5	482±8	467±7	0.000158646	325.896	26.7923	1	1	1	0	0	0		100
10836849	Itga6	Itga6	integrin, alpha 6	592.927	24		527.836	600.575	565.509	566.241	18.896	46.4946	25.4367	27.5417	7.71427	18.9814	10.3845	11.2439	528±8	601±19	566±10	566±11	0.00805565	918.956	44.9902	1	0	0	0	0	0		100
10832306	Itgb2	Itgb2	integrin, beta 2	211.29	24		128.886	202.057	185.112	168.113	5.19261	56.1105	21.2773	3.86753	2.11987	22.907	8.6864	1.57891	129±2	202±23	185±9	168±2	0.00325238	836.212	42.917	1	1	0	0	0	0		100
10754563	Itgb5	Itgb5	integrin, beta 5	420.864	24		360.498	460.933	400.305	431.408	19.8335	69.368	20.8295	72.9808	8.09697	28.3194	8.50361	29.7943	360±8	461±28	400±9	431±30	0.0246521	2632.36	76.1453	1	0	0	0	0	0		100
10766161	Itpkb	Itpkb	inositol-trisphosphate 3-kinase B	271.221	24		222.052	290.564	246.43	275.396	9.83926	49.521	20.6237	33.7459	4.01686	20.2169	8.41957	13.7767	222±4	291±20	246±8	275±14	0.00696356	953.367	45.8248	1	0	1	0	0	0		100
10866866	Itpr2	Itpr2	inositol 1,4,5-trisphosphate receptor, type 2	360.259	24		319.589	369.742	359.591	347.189	18.1237	49.3341	11.0122	19.9464	7.39896	20.1406	4.49571	8.14307	320±7	370±20	360±4	347±8	0.0316621	735.442	40.2481	1	0	0	0	0	0		100
10714505	Kank1	Kank1	KN motif and ankyrin repeat domains 1	325.838	24		287.914	345.145	328.08	324.26	11.3477	35.4816	17.9695	36.9505	4.63267	14.4853	7.33602	15.085	288±5	345±14	328±7	324±15	0.0162457	743.202	40.4598	1	0	0	0	0	0		100
10878210	Kank4	Kank4	KN motif and ankyrin repeat domains 4	233.943	24		216.205	262.048	244.849	229.804	12.2929	23.907	30.6407	19.0515	5.01854	9.76	12.509	7.77774	216±5	262±10	245±13	230±8	0.0185788	502.674	33.2747	1	0	0	0	0	0		100
10747439	Kat2a	Kat2a	K(lysine) acetyltransferase 2A	572.967	24		557.095	586.432	590.784	570.243	16.3548	28.1281	14.6923	16.2107	6.67681	11.4833	5.9981	6.61798	557±7	586±11	591±6	570±7	0.0260864	362.916	28.2731	1	1	0	0	0	0		100
10706988	Kdelr1	Kdelr1	KDEL (Lys-Asp-Glu-Leu) endoplasmic reticulum protein retention receptor 1	629.382	24		610.477	644.998	635.111	619.56	17.2618	24.8151	24.7754	11.4712	7.04708	10.1307	10.1145	4.6831	610±7	645±10	635±10	620±5	0.0432826	404.214	29.8384	1	0	0	0	0	0		100
10794477	Kif13a	Kif13a	kinesin family member 13A	469.941	24		429.217	501.628	480.878	468.836	16.3612	38.171	28.2308	15.8553	6.67943	15.5832	11.5252	6.47292	429±7	502±16	481±12	469±6	0.00119767	653.072	37.9273	1	1	1	0	0	0		100
10850321	Kif16b	Kif16b	kinesin family member 16B	254.715	24		242.529	268.574	259.871	250.29	6.20368	17.9982	15.0438	9.48933	2.53264	7.34772	6.14162	3.874	243±3	269±7	260±6	250±4	0.0165398	161.578	18.8652	1	0	0	0	0	0		100
10735344	Kif1c	Kif1c	kinesin family member 1C	681.509	24		615.836	715.072	680.162	700.415	22.4301	86.6591	46.1099	45.2793	9.15707	35.3784	18.8243	18.4852	616±9	715±35	680±19	700±18	0.0247551	2812.44	78.7069	1	0	1	0	0	0		100
10752205	Klhl6	Klhl6	kelch-like 6 (Drosophila)	89.2253	24		66.3202	91.3773	85.5072	77.4259	6.06924	27.6711	8.63599	7.81235	2.47776	11.2967	3.52563	3.18938	66±2	91±11	86±4	77±3	0.046351	206.579	21.3311	1	0	0	0	0	0		100
10706437	Klk6	Klk6	kallikrein related-peptidase 6	917.676	24	Up	771.184	874.158	970.167	927.13	28.2208	51.5223	72.6582	87.9717	11.5211	21.0339	29.6626	35.9143	771±12	874±21	970±30	927±36	0.000267923	4194.29	96.1169	1	1	1	0	0	0		100
10788278	Klkb1	Klkb1	kallikrein B, plasma 1	78.5862	24		68.6498	81.2444	76.6751	78.6122	3.69869	10.736	5.41198	7.09207	1.50998	4.38296	2.20943	2.89533	69±2	81±4	77±2	79±3	0.0372777	48.8098	10.3687	1	0	0	0	0	0		100
10861988	Klrg2	Klrg2	killer cell lectin-like receptor subfamily G, member 2	623.578	24		564.922	651.452	646.462	637.091	33.2768	39.2914	43.4381	35.6303	13.5852	16.0406	17.7335	14.546	565±14	651±16	646±18	637±15	0.00299809	1447.05	56.4563	1	1	1	0	0	0		100
10746654	Kpnb1	Kpnb1	karyopherin (importin) beta 1	1203.59	24		1162.72	1221	1222.1	1185.29	24.9619	34.2393	42.3323	33.9706	10.1906	13.9782	17.2821	13.8685	1163±10	1221±14	1222±17	1185±14	0.0214128	1186.05	51.112	1	1	0	0	0	0		100
10856259	Krcc1	Krcc1	lysine-rich coiled-coil 1	176.119	24		161.286	188.718	174.346	172.881	18.8263	10.2433	9.24739	11.301	7.68581	4.18179	3.77523	4.61361	161±8	189±4	174±4	173±5	0.0229579	171.473	19.4343	1	0	0	0	0	0		100
10778179	Kremen1	Kremen1	kringle containing transmembrane protein 1	143.424	24		129.956	155.943	136.698	150.86	10.4337	25.0808	4.72807	13.7777	4.25956	10.2392	1.93023	5.6247	130±4	156±10	137±2	151±6	0.0275791	216.916	21.8583	1	0	0	0	0	0		100
10792775	Lamp1	Lamp1	lysosomal-associated membrane protein 1	1977.63	24	Up	1817.43	1966.29	1996.83	1968.07	29.2459	19.5333	48.8434	46.7379	11.9396	7.97443	19.9402	19.0807	1817±12	1966±8	1997±20	1968±19	6.2822e-07	1508.07	57.6344	1	1	1	0	0	0		100
10931919	Lamp2	Lamp2	lysosomal-associated membrane protein 2	2715.23	24	Up	2427.53	2728.4	2654.54	2743.59	44.8171	176.265	91.4324	184.263	18.2965	71.9597	37.3271	75.2252	2428±18	2728±72	2655±37	2744±75	0.00253865	18204.4	200.244	1	1	1	0	0	0		100
10824344	Lamtor2	Lamtor2	late endosomal/lysosomal adaptor, MAPK and MTOR activator 2	206.63	24		191.896	225.048	213.997	206.469	14.9536	21.2814	13.139	23.4186	6.10478	8.68808	5.36396	9.56058	192±6	225±9	214±5	206±10	0.0499184	343.944	27.5242	1	0	0	0	0	0		100
10777209	Lap3	Lap3	leucine aminopeptidase 3	788.118	24		677.986	780.865	812.304	772.452	22.4822	46.9511	41.6206	35.9407	9.17832	19.1677	16.9915	14.6727	678±9	781±19	812±17	772±15	4.0593e-05	1392.89	55.3897	1	1	1	0	0	0		100
10883540	Laptm4a	Laptm4a	lysosomal protein transmembrane 4 alpha	2909.63	24		2789.27	2928.82	2872.54	2998.38	73.4432	93.7972	77.4233	106.76	29.983	38.2925	31.6079	43.5848	2789±30	2929±38	2873±32	2998±44	0.00490313	7848.52	131.482	1	0	1	0	0	0		100
10872489	Laptm5	Laptm5	lysosomal protein transmembrane 5	541.241	24		374.23	557.485	516.439	477.43	13.2623	155.865	47.9064	28.7677	5.41433	63.6315	19.5577	11.7444	374±5	557±64	516±20	477±12	0.00523516	5982.51	114.792	1	1	0	0	0	0		100
10710739	Lcmt1	Lcmt1	leucine carboxyl methyltransferase 1	416.927	24		398.201	427.164	435.467	413.057	15.9502	20.8799	17.3746	19.832	6.51166	8.52419	7.09315	8.09638	398±7	427±9	435±7	413±8	0.0135441	341.677	27.4333	1	1	0	0	0	0		100
10732725	Lcp2	Lcp2	lymphocyte cytosolic protein 2	368.693	24		274.837	379.392	350.559	325.639	11.8434	85.5368	38.1748	33.8089	4.83506	34.9202	15.5848	13.8024	275±5	379±35	351±16	326±14	0.0111066	2261.54	70.5786	1	1	0	0	0	0		100
10831836	Lemd2	Lemd2	LEM domain containing 2	153.55	24		137.861	165.295	154.713	159.431	10.3716	12.7397	10.8907	8.44708	4.23418	5.20096	4.4461	3.4485	138±4	165±5	155±4	159±3	0.00222904	112.466	15.7391	1	1	1	0	0	0		100
10779673	Lgals3	Lgals3	lectin, galactoside-binding, soluble, 3	102.878	24		55.0589	91.5364	75.9223	69.2771	8.51584	26.1419	23.558	3.73287	3.47658	10.6724	9.61749	1.52394	55±3	92±11	76±10	69±2	0.0226972	312.671	26.2431	1	0	0	0	0	0		100
10891834	Lgmn	Lgmn	legumain	1186.08	24		962.871	1192.63	1112.88	1128.44	23.7313	182.197	52.8274	99.4704	9.68828	74.3815	21.5667	40.6086	963±10	1193±74	1113±22	1128±41	0.00913954	10474.9	151.896	1	0	1	0	0	0		100
10833889	Lin28b	Lin28b	lin-28 homolog B (C. elegans)	79.2894	24		70.1502	84.4843	83.2711	78.4344	8.17552	9.63341	6.46197	7.16874	3.33764	3.93282	2.63809	2.92663	70±3	84±4	83±3	78±3	0.023933	61.6392	11.652	1	1	0	0	0	0		100
10824322	Lmna	Lmna	lamin A	245.918	24		231.317	247.201	243.724	251.87	9.53433	12.4017	7.50493	11.2248	3.89237	5.06297	3.06387	4.58249	231±4	247±5	244±3	252±5	0.0162894	104.28	15.1555	1	0	1	0	0	0		100
10809524	LOC100359680	LOC100359680	Lysophosphatidylcholine acyltransferase 2-like	352.422	24		292.021	384.554	349	328.356	12.1201	59.233	46.5076	28.6524	4.94799	24.1818	18.9866	11.6973	292±5	385±24	349±19	328±12	0.00809301	1562.54	58.666	1	0	0	0	0	0		100
10829881	LOC100360692	LOC100360692	phenazine biosynthesis-like domain-containing protein-like	120.837	24		108.242	133.194	120.295	118.925	8.9166	10.2762	15.736	11.8122	3.64019	4.19525	6.4242	4.82233	108±4	133±4	120±6	119±5	0.024737	145.036	17.8735	1	0	0	0	0	0		100
10866503	LOC100361076	LOC100361076	histone H4 replacement-like	492.881	24		453.496	528.296	517.575	485.022	31.6173	55.4012	5.56386	11.2598	12.9077	22.6174	2.27143	4.5968	453±13	528±23	518±2	485±5	0.00407734	1001.84	46.9754	1	1	0	0	0	0		100
10865483	LOC100362005	LOC100362005	C10 protein	821.409	24		793.968	849.919	839.477	810.353	14.8446	38.5289	30.631	20.9642	6.06029	15.7294	12.5051	8.55858	794±6	850±16	839±13	810±9	0.00918105	733.08	40.1834	1	1	0	0	0	0		100
10895128	LOC100362836	LOC100362836	rCG49027-like	214.188	24		198.143	228.825	215.012	211.359	10.5462	17.234	10.3815	11.8778	4.30547	7.03575	4.23821	4.84909	198±4	229±7	215±4	211±5	0.00662776	157.286	18.613	1	0	0	0	0	0		100
10809885	LOC100363445	LOC100363445	rCG41835-like	574.606	24		515.59	596.225	564.469	598.558	38.4416	63.7661	18.3186	62.8422	15.6937	26.0324	7.47853	25.6552	516±16	596±26	564±7	599±26	0.0305964	2372.46	72.2887	1	0	1	0	0	0		100
10775848	LOC100911949	LOC100911949	uncharacterized LOC100911949	120.536	24		113.897	127.452	121.734	120.919	5.1655	7.03198	5.44251	0.690139	2.10881	2.87079	2.2219	0.281748	114±2	127±3	122±2	121±0	0.00387979	26.7343	7.6737	1	1	0	0	0	0		100
10851787	LOC685574	LOC685574	zinc finger protein 334	347.445	24		329.493	367.216	357.57	352.174	9.40792	28.6652	17.5812	21.4658	3.84077	11.7025	7.17747	8.76337	329±4	367±12	358±7	352±9	0.0314416	398.879	29.6409	1	0	0	0	0	0		100
10930896	Lonp1	Lonp1	lon peptidase 1, mitochondrial	499.265	24		466.562	510.285	524.175	490.516	20.0186	17.2898	26.2688	12.0978	8.17256	7.05854	10.7242	4.93891	467±8	510±7	524±11	491±5	0.000466691	388.5	29.2527	1	1	0	0	0	-1		100
10858672	Lpcat3	Lpcat3	lysophosphatidylcholine acyltransferase 3	792.45	24		743.6	805.945	779.973	799.084	29.1341	28.4183	36.5531	33.5858	11.8939	11.6017	14.9227	13.7114	744±12	806±12	780±15	799±14	0.0176825	1041.84	47.904	1	0	1	0	0	0		100
10816204	Lrba	Lrba	LPS-responsive vesicle trafficking, beach and anchor containing	386.324	24		370.029	406.055	384.581	386.793	20.6785	9.26321	13.8156	10.7937	8.44195	3.78169	5.64021	4.40651	370±8	406±4	385±6	387±4	0.00629988	211.479	21.5826	1	0	0	0	0	0		100
10837881	Lrp4	Lrp4	low density lipoprotein receptor-related protein 4	492.718	24		451.795	501.159	510.686	468.13	19.7774	26.022	29.292	14.6492	8.07409	10.6234	11.9584	5.98053	452±8	501±11	511±12	468±6	0.000891621	527.759	34.0948	1	1	0	0	0	-1		100
10866374	Lrp6	Lrp6	low density lipoprotein receptor-related protein 6	732.312	24		698.401	758.586	728.576	742.639	12.9905	34.5578	15.7022	20.2806	5.30335	14.1082	6.41041	8.27952	698±5	759±14	729±6	743±8	0.00132381	468.95	32.1391	1	0	1	0	0	0		100
10773452	Lrpap1	Lrpap1	low density lipoprotein receptor-related protein associated protein 1	931.2	24		895.229	958.011	945.451	927.901	32.9024	50.3814	19.0291	26.4089	13.4324	20.5681	7.76861	10.7814	895±13	958±21	945±8	928±11	0.0265533	1098.09	49.1801	1	1	0	0	0	0		100
10873792	Lrrc38	Lrrc38	leucine rich repeat containing 38	46.5203	20		41.6597	50.7678	45.8238	49.3979	3.77954	4.98939	5.08556	5.50425	1.54299	2.03691	2.07617	2.2471	42±2	51±2	46±2	49±2	0.0235501	23.7789	7.23713	1	0	1	0	0	0		100
10754214	Lrrc58	Lrrc58	leucine rich repeat containing 58	2153.33	24		2068.47	2171.56	2102.12	2174.41	38.0018	67.6108	35.3319	63.5179	15.5142	27.602	14.4242	25.9311	2068±16	2172±28	2102±14	2174±26	0.00538467	2732.63	77.582	1	0	1	0	0	0		100
10894878	Lta4h	Lta4h	leukotriene A4 hydrolase	404.901	24		379.885	410.103	409.889	398.658	13.0145	17.6652	22.6763	20.0941	5.31314	7.21177	9.25755	8.20337	380±5	410±7	410±9	399±8	0.0413574	351.844	27.8385	1	1	0	0	0	0		100
10865685	Ltbr	Ltbr	lymphotoxin beta receptor (TNFR superfamily, member 3)	146.791	24		132.638	152.485	141.714	142.321	8.4993	10.583	10.9167	9.76546	3.46983	4.3205	4.45671	3.98673	133±3	152±4	142±4	142±4	0.0319855	99.0465	14.7703	1	0	0	0	0	0		100
10867461	Lyn	Lyn	v-yes-1 Yamaguchi sarcoma viral related oncogene homolog	206.449	24		154.575	220.746	189.54	183.642	6.55028	60.9466	18.3234	23.4128	2.67414	24.8814	7.48048	9.55825	155±3	221±25	190±7	184±10	0.0246249	1025.9	47.536	1	0	0	0	0	0		100
10773613	Maea	Maea	macrophage erythroblast attacher	663.283	24		629.367	686.99	687.303	653.805	33.5305	28.381	29.7651	25.4251	13.6888	11.5865	12.1515	10.3797	629±14	687±12	687±12	654±10	0.00821056	868.704	43.7428	1	1	0	0	0	0		100
10938935	Magt1	Magt1	magnesium transporter 1	301.476	24		268.618	313.179	295.016	300.971	18.7034	19.6715	12.3981	37.0164	7.63561	8.03086	5.06149	15.1119	269±8	313±8	295±5	301±15	0.036279	574.557	35.5744	1	0	0	0	0	0		100
10880539	Man1c1	Man1c1	mannosidase, alpha, class 1C, member 1	741.768	24		667.272	772.801	765.447	690.743	38.6593	101.432	77.6906	35.5994	15.7826	41.4094	31.7171	14.5334	667±16	773±41	765±32	691±15	0.0333407	4481.17	99.3497	1	0	0	0	0	0		100
10809912	Man2b1	Man2b1	mannosidase, alpha, class 2B, member 1	406.962	24		357.434	416.465	382.415	397.154	6.03105	40.2256	16.4471	37.252	2.46216	16.422	6.71451	15.2081	357±2	416±16	382±7	397±15	0.0167181	786.598	41.6243	1	0	0	0	0	0		100
10773298	Man2b2	Man2b2	mannosidase, alpha, class 2B, member 2	579.847	24		540.121	580.395	582.624	573.365	12.5845	23.6878	10.0801	18.5735	5.13761	9.67051	4.11517	7.5826	540±5	580±10	583±4	573±8	0.00100796	277.327	24.7154	1	1	1	0	0	0		100
10932211	Maob	Maob	monoamine oxidase B	893.094	24	Up	813.094	899.964	935.956	913.771	16.0624	36.0568	36.265	60.0678	6.55744	14.7201	14.8051	24.5226	813±7	900±15	936±15	914±25	0.000257906	1637.2	60.0512	1	1	1	0	0	0		100
10759538	Map2k7	Map2k7	mitogen activated protein kinase kinase 7	374.693	24		351.544	387.865	385.753	382	11.5553	12.095	15.0389	14.5252	4.71745	4.93776	6.1396	5.92988	352±5	388±5	386±6	382±6	0.000521788	180.975	19.9655	1	1	1	0	0	0		100
10710890	Mapk3	Mapk3	mitogen activated protein kinase 3	1160.93	24		1102.42	1191.4	1190.95	1150.22	42.5602	35.0363	16.8667	38.9791	17.3751	14.3035	6.88581	15.9132	1102±17	1191±14	1191±7	1150±16	0.000853003	1209.81	51.6213	1	1	0	0	0	0		100
10835666	Mapkap1	Mapkap1	mitogen-activated protein kinase associated protein 1	781.439	24		761.966	804.932	793.098	763.696	35.3176	32.3772	22.6116	21.9617	14.4183	13.2179	9.23114	8.96581	762±14	805±13	793±9	764±9	0.0485064	810.409	42.2496	1	0	0	0	0	0		100
10767489	Mapkapk2	Mapkapk2	mitogen-activated protein kinase-activated protein kinase 2	420.159	24		373.336	433.59	409.826	421.488	12.8256	47.1353	22.8764	19.8902	5.23602	19.2429	9.33926	8.12012	373±5	434±19	410±9	421±8	0.00909096	752.851	40.7216	1	0	1	0	0	0		100
10802567	Mbd2	Mbd2	methyl-CpG binding domain protein 2	1557.54	24		1481.96	1587.1	1563.52	1554.12	54.7425	71.8208	32.5565	39.8055	22.3485	29.3207	13.2911	16.2505	1482±22	1587±29	1564±13	1554±16	0.0142248	2570.45	75.2447	1	1	0	0	0	0		100
10822799	Mccc1	Mccc1	methylcrotonoyl-CoA carboxylase 1 (alpha)	317.639	24		304.584	325.286	330.178	309.298	16.4132	11.5933	17.1378	7.71866	6.70067	4.73293	6.99649	3.15113	305±7	325±5	330±7	309±3	0.0136317	192.158	20.5731	1	1	0	0	0	-1		100
10759698	Mcoln1	Mcoln1	mucolipin 1	1153.93	24		1121.48	1191.14	1174.31	1137.46	22.2741	36.4504	32.9163	62.9812	9.09335	14.8808	13.438	25.712	1121±9	1191±15	1174±13	1137±26	0.0417319	1739.25	61.8945	1	0	0	0	0	0		100
10805186	Me2	Me2	malic enzyme 2, NAD(+)-dependent, mitochondrial	353.898	24		318.275	353.95	351.222	357.3	5.997	14.0297	17.3887	32.2594	2.44827	5.7276	7.0989	13.1698	318±2	354±6	351±7	357±13	0.0118082	404.333	29.8429	1	1	1	0	0	0		100
10843875	Med22	Med22	mediator complex subunit 22	180.506	24		165.366	188.164	188.205	181.275	8.34055	5.68272	13.6917	10.6252	3.40501	2.31996	5.58963	4.33772	165±3	188±2	188±6	181±4	0.00330021	104.147	15.1458	1	1	1	0	0	0		100
10834935	Med27	Med27	mediator complex subunit 27	365.658	24		337.236	383.091	388.515	361.483	6.41565	8.75203	20.9216	24.3608	2.61918	3.573	8.54122	9.94526	337±3	383±4	389±9	361±10	0.000244612	298.317	25.6336	1	1	0	0	0	-1		100
10839674	Mertk	Mertk	c-mer proto-oncogene tyrosine kinase	554.055	24		470.365	582.546	539.525	523.973	30.5112	86.1558	32.282	29.4797	12.4561	35.173	13.1791	12.035	470±12	583±35	540±13	524±12	0.0089907	2310.62	71.3404	1	0	0	0	0	0		100
10859766	Mettl20	Mettl20	methyltransferase like 20	49.4548	20		40.5174	58.4942	43.7407	54.3312	6.3912	17.9628	5.1768	9.617	2.6092	7.33328	2.11342	3.92612	41±3	58±7	44±2	54±4	0.0301144	110.069	15.5705	1	0	0	0	0	0		100
10859392	Mgst1	Mgst1	microsomal glutathione S-transferase 1	474.215	24	Up	362.465	489.031	464.83	520.968	35.6743	76.9485	52.0174	34.807	14.564	31.4141	21.236	14.2099	362±15	489±31	465±21	521±14	0.000247275	2612.33	75.8551	1	1	1	0	0	0		100
10870401	Mier1	Mier1	mesoderm induction early response 1 homolog (Xenopus laevis)	359.471	24		336.746	365.259	357.962	364.44	13.7573	20.6985	13.968	16.8217	5.61641	8.45015	5.70242	6.86744	337±6	365±8	358±6	364±7	0.0253059	265.812	24.1968	1	0	1	0	0	0		100
10748991	Mif4gd	Mif4gd	MIF4G domain containing	93.4512	24		86.6442	97.1281	90.7317	90.2392	6.74307	5.04679	4.35589	3.23748	2.75285	2.06034	1.77828	1.3217	87±3	97±2	91±2	90±1	0.02187	25.079	7.43235	1	0	0	0	0	0		100
10857435	Mitf	Mitf	microphthalmia-associated transcription factor	274.614	24		238.581	300.861	267.443	286.685	8.07436	50.1972	7.02638	35.5422	3.29635	20.4929	2.86851	14.51	239±3	301±20	267±3	287±15	0.0140877	893.058	44.3517	1	0	1	0	0	0		100
10906079	Mlc1	Mlc1	megalencephalic leukoencephalopathy with subcortical cysts 1	2163.73	24		2019.62	2132.35	2160.11	2169.3	30.161	63.8545	70.1478	52.5242	12.3132	26.0685	28.6377	21.4429	2020±12	2132±26	2160±29	2169±21	0.000593349	3118.71	82.8817	1	1	1	0	0	0		100
10809136	Mmp15	Mmp15	matrix metallopeptidase 15	551.965	24		532.675	580.5	556.953	560.88	6.8978	16.1776	25.1874	34.4435	2.81601	6.60449	10.2827	14.0615	533±3	581±7	557±10	561±14	0.0250312	546.766	34.7034	1	0	0	0	0	0		100
10718459	Mob1a	Mob1a	MOB kinase activator 1A	629.166	24		573.605	625.79	620.352	612.377	22.2448	35.1749	40.9656	18.575	9.08141	14.3601	16.7241	7.58323	574±9	626±14	620±17	612±8	0.0355853	923.121	45.0921	1	1	0	0	0	0		100
10871127	Mob3c	Mob3c	MOB kinase activator 3C	40.6401	12		36.0265	44.5935	42.9238	38.407	1.69265	5.28062	4.35961	4.77015	0.691022	2.1558	1.7798	1.9474	36±1	45±2	43±2	38±2	0.0100306	17.6141	6.22875	1	1	0	0	0	0		100
10926204	Mocs1	Mocs1	molybdenum cofactor synthesis 1	156.232	24		144.914	160.171	159.233	153.552	8.57313	12.0293	9.15666	7.40147	3.49997	4.91095	3.73819	3.02164	145±3	160±5	159±4	154±3	0.0433167	86.2865	13.7861	1	1	0	0	0	0		100
10717240	Moxd1	Moxd1	monooxygenase, DBH-like 1	492.49	24		445.309	491.083	497.878	484.384	22.0679	42.2709	18.4301	25.969	9.00919	17.257	7.52407	10.6018	445±9	491±17	498±8	484±11	0.0184701	771.188	41.2146	1	1	0	0	0	0		100
10714103	Mpeg1	Mpeg1	macrophage expressed 1	262.997	24		179.28	268.866	251.406	241.3	6.09774	105.539	32.1449	17.1183	2.48939	43.0859	13.1231	6.9885	179±2	269±43	251±13	241±7	0.0456047	2703.74	77.1709	1	0	0	0	0	0		100
10738972	Mrc2	Mrc2	mannose receptor, C type 2	196.622	24		178.76	197.257	186.938	196.738	10.2485	12.2897	12.9871	10.3837	4.18392	5.01725	5.30196	4.23914	179±4	197±5	187±5	197±4	0.0391791	132.197	17.064	1	0	1	0	0	0		100
10737784	Mrpl10	Mrpl10	mitochondrial ribosomal protein L10	405.605	24		386.807	413.585	422.911	405.033	13.4775	10.6207	7.49031	15.8031	5.50218	4.33589	3.0579	6.45159	387±6	414±4	423±3	405±6	0.000564229	152.033	18.2995	1	1	0	0	0	0		100
10764983	Mrps14	Mrps14	mitochondrial ribosomal protein S14	246.501	24		232.424	253.435	263.76	243.418	15.2004	12.8569	17.0891	7.37139	6.20555	5.24881	6.9766	3.00936	232±6	253±5	264±7	243±3	0.00567267	186.755	20.2818	1	1	0	0	0	-1		100
10728924	Ms4a6b	Ms4a6b	membrane-spanning 4-domains, subfamily A, member 6B	42.0109	5		26.0839	38.5419	38.5534	34.4845	4.3486	13.658	3.36467	1.61497	1.77531	5.57587	1.37362	0.659309	26±2	39±6	39±1	34±1	0.0194085	47.914	10.2731	1	1	0	0	0	0		100
10934056	Msn	Msn	moesin	345.164	24		259.404	349.311	324.024	323.17	8.9876	35.1234	30.535	33.4631	3.66917	14.3391	12.4658	13.6613	259±4	349±14	324±12	323±14	0.000317527	821.016	42.5252	1	1	1	0	0	0		100
10809399	Mt2A	Mt2A	metallothionein 2A	10401.8	24		9118.95	10743.9	9987.12	10113.7	531.846	1229.15	510.945	676.838	217.125	501.799	208.592	276.318	9119±217	10744±502	9987±209	10114±276	0.0181991	581760	1131.99	1	0	0	0	0	0		100
10795760	Mtr	Mtr	5-methyltetrahydrofolate-homocysteine methyltransferase	251.605	24		243.534	262.986	249.942	249.878	10.7859	8.99769	9.2376	11.3298	4.40332	3.67329	3.77123	4.62538	244±4	263±4	250±4	250±5	0.0382087	103.895	15.1275	1	0	0	0	0	0		100
10807995	Mtss1l	Mtss1l	metastasis suppressor 1-like	1283.68	24		1232.11	1362.76	1292.4	1295.43	38.0118	128.422	43.5736	44.6679	15.5183	52.4281	17.7888	18.2356	1232±16	1363±52	1292±18	1295±18	0.0473826	4876.99	103.645	1	0	0	0	0	0		100
10721433	Myh14	Myh14	myosin, heavy chain 14, non-muscle	378.994	24		363.909	385.309	381.745	389.244	10.6333	17.0836	14.6683	7.28169	4.34101	6.97436	5.9883	2.97274	364±4	385±7	382±6	389±3	0.0140952	161.771	18.8765	1	0	1	0	0	0		100
10736073	Myo18a	Myo18a	myosin XVIIIa	523.911	24		492.224	539.266	543.763	517.996	22.9947	23.8573	14.4104	17.5171	9.38753	9.73969	5.883	7.15133	492±9	539±10	544±6	518±7	0.00103059	394.368	29.4728	1	1	0	0	0	0		100
10911315	Myo1e	Myo1e	myosin IE	473.478	24		429.74	487.85	473.664	458.462	22.4759	52.3286	13.3527	24.1054	9.17576	21.3631	5.45121	9.84098	430±9	488±21	474±5	458±10	0.026485	909.253	44.7521	1	0	0	0	0	0		100
10787212	Myo9b	Myo9b	myosin IXb	494.41	24		449.534	509.474	502.854	489.595	14.981	14.8568	26.4543	20.0775	6.11598	6.06524	10.7999	8.1966	450±6	509±6	503±11	490±8	0.0002682	395.774	29.5253	1	1	1	0	0	0		100
10729913	Myof	Myof	myoferlin	144.946	24		130.162	152.529	146.287	145.221	9.66214	11.3806	6.77841	8.83907	3.94455	4.6461	2.76727	3.60854	130±4	153±5	146±3	145±4	0.00448821	84.486	13.6415	1	1	1	0	0	0		100
10771690	Naaa	Naaa	N-acylethanolamine acid amidase	194.195	24		142.722	207.041	179.855	183.054	12.3812	32.2229	10.5318	22.8141	5.05462	13.1549	4.2996	9.31382	143±5	207±13	180±4	183±9	0.000545105	425.092	30.5994	1	1	1	0	0	0		100
10778351	Nacad	Nacad	NAC alpha domain containing	275.285	24		252.627	276.476	289.557	285.79	6.89859	20.812	9.81918	9.51623	2.81634	8.49648	4.00866	3.88498	253±3	276±8	290±4	286±4	0.000230366	152.915	18.3525	1	1	1	0	0	0		100
10843647	Nacc2	Nacc2	nucleus accumbens associated 2, BEN and BTB (POZ) domain containing	587.742	24		557.771	595.556	596.792	616.889	8.33553	27.9621	28.2092	28.8186	3.40296	11.4155	11.5164	11.7652	558±3	596±11	597±12	617±12	0.00479903	610.858	36.681	1	1	1	0	0	0		100
10904653	Naprt1	Naprt1	nicotinate phosphoribosyltransferase domain containing 1	225.008	24		209.285	227.657	232.302	218.634	14.8179	9.20128	8.7689	8.64827	6.04937	3.75641	3.57989	3.53064	209±6	228±4	232±4	219±4	0.00803879	115.523	15.9516	1	1	0	0	0	0		100
10911270	Narg2	Narg2	NMDA receptor regulated 2	153.971	24		146.17	160.163	157.073	150.035	10.4942	5.40201	7.74569	6.86545	4.28425	2.20536	3.16216	2.80281	146±4	160±2	157±3	150±3	0.0318869	63.3168	11.8095	1	0	0	0	0	0		100
10908702	Ncapd3	Ncapd3	non-SMC condensin II complex, subunit D3	214.842	24		208.126	223.261	218.562	211.194	6.12235	8.50991	6.11258	11.5486	2.49944	3.47415	2.49545	4.71471	208±2	223±3	219±2	211±5	0.0286055	70.0402	12.4207	1	0	0	0	0	0		100
10757898	Ncf1	Ncf1	neutrophil cytosolic factor 1	102.056	24		72.3255	101.297	92.5846	93.1499	6.54234	20.2821	10.3561	9.84569	2.6709	8.28014	4.22785	4.01949	72±3	101±8	93±4	93±4	0.00578092	151.6	18.2734	1	1	1	0	0	0		100
10899644	Nckap1l	Nckap1l	NCK associated protein 1 like	186.027	24		135.172	192.168	183.743	159.278	9.56298	50.4564	26.6839	11.2735	3.90407	20.5987	10.8937	4.60237	135±4	192±21	184±11	159±5	0.0116858	780.855	41.4721	1	1	0	0	0	0		100
10758156	Ncor2	Ncor2	nuclear receptor co-repressor 2	675.729	24		646.793	695.323	698.355	674.71	12.5326	39.6035	33.337	22.3912	5.11641	16.1681	13.6098	9.14117	647±5	695±16	698±14	675±9	0.0203464	795.931	41.8705	1	1	0	0	0	0		100
10769933	Ncstn	Ncstn	nicastrin	860.112	24		831.056	889.397	852.132	847.909	27.6124	35.0192	17.6146	30.5917	11.2727	14.2965	7.19114	12.489	831±11	889±14	852±7	848±12	0.0212208	786.748	41.6283	1	0	0	0	0	0		100
10783213	Ndrg2	Ndrg2	N-myc downstream regulated gene 2	7903.06	24		7731.01	8074.73	7954.63	7933.55	164.43	215.759	173.847	119.805	67.1284	88.0834	70.9729	48.9103	7731±67	8075±88	7955±71	7934±49	0.0233907	28646.1	251.191	1	0	0	0	0	0		100
10894390	Ndufa7	Ndufa7	NADH dehydrogenase (ubiquinone) 1 alpha subcomplex, 7	689.028	24		668.361	720.869	715.612	680.907	38.1719	35.5472	28.2865	17.168	15.5836	14.5121	11.5479	7.00881	668±16	721±15	716±12	681±7	0.0223802	937.592	45.4441	1	1	0	0	0	0		100
10821237	Ndufaf2	Ndufaf2	NADH dehydrogenase (ubiquinone) 1 alpha subcomplex, assembly factor 2	167.175	24		149.44	180.066	178.317	163.514	17.4154	17.6687	9.74836	13.653	7.1098	7.21323	3.97975	5.57381	149±7	180±7	178±4	164±6	0.00750388	219.599	21.9931	1	1	0	0	0	0		100
10923576	Ndufb3	Ndufb3	NADH dehydrogenase (ubiquinone) 1 beta subcomplex 3	1196.69	24		1146.54	1256.9	1217.79	1207.37	35.7452	61.0297	53.043	45.4024	14.5929	24.9153	21.6547	18.5355	1147±15	1257±25	1218±22	1207±19	0.0113373	2403.25	72.7563	1	0	0	0	0	0		100
10799848	Nebl	Nebl	nebulette	505.513	24		464.162	519.728	532.143	500.099	2.21801	25.0956	32.2613	31.0926	0.9055	10.2452	13.1706	12.6935	464±1	520±10	532±13	500±13	0.00318809	698.698	39.2297	1	1	0	0	0	0		100
10835964	Nek6	Nek6	NIMA (never in mitosis gene a)-related kinase 6	440.289	24		359.989	459.503	438.063	414.434	4.59456	54.8452	20.6659	36.1549	1.87572	22.3905	8.43681	14.7602	360±2	460±22	438±8	414±15	0.00047772	1095.2	49.1154	1	1	1	0	0	0		100
10891271	Nek9	Nek9	NIMA (never in mitosis gene a)- related kinase 9	431.639	24		411.333	432.753	428.669	445.255	9.02385	19.6631	8.43835	11.0574	3.68397	8.02742	3.44494	4.51417	411±4	433±8	429±3	445±5	0.00150212	153.74	18.402	1	0	1	0	0	0		100
10846286	Nfe2l2	Nfe2l2	nuclear factor, erythroid derived 2, like 2	575.668	24	Up	489.32	569.969	546.582	574.269	11.7563	37.4515	27.3156	82.6208	4.79949	15.2895	11.1516	33.7298	489±5	570±15	547±11	574±34	0.026179	2324.38	71.5525	1	0	1	0	0	0		100
10893513	Nfic	Nfic	nuclear factor I/C	490.951	24		461.291	501.862	506.471	503.033	15.3769	38.4984	19.4121	13.7018	6.27761	15.7169	7.92494	5.59375	461±6	502±16	506±8	503±6	0.00878343	522.821	33.935	1	1	1	0	0	0		100
10823119	Nhlrc3	Nhlrc3	NHL repeat containing 3	204.44	24		185.237	206.008	211.539	198.316	9.50238	15.2088	7.23134	10.2574	3.87933	6.20897	2.95218	4.18757	185±4	206±6	212±3	198±4	0.00276401	113.907	15.8397	1	1	0	0	0	0		100
10923567	Nif3l1	Nif3l1	NIF3 NGG1 interacting factor 3-like 1 (S. cerevisiae)	213.065	24		193.802	221.509	218.835	211.981	15.6609	13.647	19.3466	13.4346	6.39354	5.57135	7.8982	5.48465	194±6	222±6	219±8	212±5	0.0324767	249.746	23.4542	1	1	0	0	0	0		100
10750731	Nit2	Nit2	nitrilase family, member 2	219.513	24		199.17	226.5	219.319	219.288	10.6279	12.3783	14.5771	13.3663	4.33883	5.0534	5.95107	5.45678	199±4	227±5	219±6	219±5	0.0117597	164.916	19.0591	1	1	1	0	0	0		100
10821117	Nln	Nln	neurolysin (metallopeptidase M3 family)	337.969	24		315.477	348.41	338.881	335.484	12.192	9.54333	20.076	18.092	4.97736	3.89605	8.196	7.38604	315±5	348±4	339±8	335±7	0.0174113	250.493	23.4892	1	0	0	0	0	0		100
10913545	Nme6	Nme6	non-metastatic cells 6, protein expressed in (nucleoside-diphosphate kinase)	86.5274	24		80.2544	88.4631	85.3433	86.4144	0.890582	3.12452	4.57853	4.80908	0.363579	1.27558	1.86918	1.9633	80±0	88±1	85±2	86±2	0.0201141	14.593	5.66948	1	0	1	0	0	0		100
10845136	Nmi	Nmi	N-myc (and STAT) interactor	120.913	24		102.697	128.322	122.893	119.539	6.41591	13.5646	7.87903	12.3344	2.61929	5.53772	3.2166	5.03549	103±3	128±6	123±3	120±5	0.00306662	105.942	15.2758	1	1	1	0	0	0		100
10817711	Notch2	Notch2	notch 2	496.913	24		406.495	577.583	481.012	523.768	11.9473	131.702	20.1745	59.8446	4.87745	53.767	8.23619	24.4315	406±5	578±54	481±8	524±24	0.00426191	4738.79	102.166	1	0	1	0	0	0		100
10704669	Nova2	Nova2	neuro-oncological ventral antigen 2	672.707	24		644.962	699.172	707.163	661.499	28.5093	33.4772	36.8315	23.6055	11.6389	13.667	15.0364	9.63691	645±12	699±14	707±15	661±10	0.00724188	953.457	45.827	1	1	0	0	0	0		100
10891160	Npc2	Npc2	Niemann-Pick disease, type C2	1234.96	24		853.119	1322.19	1195.16	1193.34	25.4901	251.989	92.59	135.515	10.4063	102.874	37.7997	55.3236	853±10	1322±103	1195±38	1193±55	0.000185058	20627.8	213.156	1	1	1	0	0	0		100
10768726	Npl	Npl	N-acetylneuraminate pyruvate lyase	289.993	24		256.89	299.594	284.693	273.5	11.9659	36.9178	10.4557	9.69243	4.88507	15.0716	4.26854	3.95692	257±5	300±15	285±4	273±4	0.0122587	378.102	28.8586	1	0	0	0	0	0		100
10726209	Nsmce4a	Nsmce4a	non-SMC element 4 homolog A (S. cerevisiae)	705.147	24		672.369	727.075	716.701	687.491	28.5518	47.5693	19.2241	20.0083	11.6562	19.4201	7.84822	8.16836	672±12	727±19	717±8	687±8	0.0220324	893.52	44.3632	1	0	0	0	0	0		100
10806034	Nudt21	Nudt21	nudix (nucleoside diphosphate linked moiety X)-type motif 21	1117.04	24		1070.38	1135.06	1134.53	1128.88	18.3088	37.3493	24.1545	23.1364	7.47454	15.2478	9.86105	9.44541	1070±7	1135±15	1135±10	1129±9	0.000842616	676.296	38.5957	1	1	1	0	0	0		100
10831868	Nudt3	Nudt3	nudix (nucleoside diphosphate linked moiety X)-type motif 3	1605.24	24		1544.57	1636.09	1662.12	1607.52	34.6325	30.9159	45.4041	26.4563	14.1387	12.6214	18.5362	10.8007	1545±14	1636±13	1662±19	1608±11	0.000113634	1243.56	52.3364	1	1	1	0	0	-1		100
10709274	Numa1	Numa1	nuclear mitotic apparatus protein 1	641.029	24		614.074	658.35	653.891	626.198	10.2766	34.7019	26.7126	16.8687	4.19542	14.167	10.9054	6.8866	614±4	658±14	654±11	626±7	0.0117709	543.974	34.6146	1	1	0	0	0	0		100
10835458	Nup214	Nup214	nucleoporin 214	707.392	24		688.971	728.144	707.213	709.193	21.7357	31.8218	7.95496	17.6437	8.87358	12.9912	3.2476	7.20301	689±9	728±13	707±3	709±7	0.0460524	436.086	30.9925	1	0	0	0	0	0		100
10711181	Orai3	Orai3	ORAI calcium release-activated calcium modulator 3	352.589	24		335.71	367.724	352.822	358.873	11.5932	9.02135	10.647	18.0926	4.73289	3.68295	4.34662	7.38629	336±5	368±4	353±4	359±7	0.0043621	168.477	19.2637	1	0	1	0	0	0		100
10714080	Osbp	Osbp	oxysterol binding protein	970.72	24		940.774	988.818	987.987	975.304	22.8923	27.8587	35.8107	17.4587	9.34575	11.3733	14.6197	7.12747	941±9	989±11	988±15	975±7	0.0210092	718.989	39.7953	1	1	0	0	0	0		100
10761992	P2rx7	P2rx7	purinergic receptor P2X, ligand-gated ion channel, 7	423.142	24		376.567	439.387	412.336	397.15	21.083	39.4338	31.7112	29.907	8.60709	16.0988	12.9461	12.2095	377±9	439±16	412±13	397±12	0.0221632	944.353	45.6077	1	0	0	0	0	0		100
10823365	P2ry12	P2ry12	purinergic receptor P2Y, G-protein coupled, 12	534.279	24		387.705	540.436	537.715	524.235	28.0781	132.89	60.6987	56.3399	11.4628	54.2522	24.7801	23.0007	388±11	540±54	538±25	524±23	0.00656309	5730.19	112.345	1	1	1	0	0	0		100
10760047	Pan3	Pan3	PAN3 polyA specific ribonuclease subunit homolog (S. cerevisiae)	735.186	24		691.167	760.555	732.385	738.028	15.2039	26.1487	23.1262	35.064	6.20698	10.6751	9.44124	14.3148	691±6	761±11	732±9	738±14	0.00225688	669.07	38.389	1	1	1	0	0	0		100
10729802	Pank1	Pank1	pantothenate kinase 1	339.361	24		323.437	354.704	350.425	344.171	2.37298	21.2829	14.0773	19.7731	0.968764	8.68872	5.74702	8.07235	323±1	355±9	350±6	344±8	0.031628	265.562	24.1854	1	1	0	0	0	0		100
10751469	Parp14	Parp14	poly (ADP-ribose) polymerase family, member 14	132.934	24		107.2	146.551	118.578	129.924	10.1155	31.1604	15.7316	20.5356	4.12962	12.7212	6.4224	8.38363	107±4	147±13	119±6	130±8	0.0279704	407.446	29.9575	1	0	0	0	0	0		100
10754426	Parp9	Parp9	poly (ADP-ribose) polymerase family, member 9	118.731	24		94.2961	124.932	111.66	110.523	8.96315	21.1997	16.5302	9.62053	3.65919	8.65473	6.74843	3.92756	94±4	125±9	112±7	111±4	0.0210352	212.021	21.6103	1	0	0	0	0	0		100
10898245	Parvg	Parvg	parvin, gamma	230.281	24		195.917	231.752	219.715	220.875	6.18399	16.8962	11.9458	14.8554	2.5246	6.89786	4.87687	6.06471	196±3	232±7	220±5	221±6	0.001354	165.793	19.1097	1	1	1	0	0	0		100
10829888	Pbld	Pbld	phenazine biosynthesis-like protein domain containing	198.136	24		144.945	201.494	230.943	203.601	13.9753	51.8188	23.1269	17.6381	5.70538	21.1549	9.44152	7.20071	145±6	201±21	231±9	204±7	0.000534981	839.32	42.9966	1	1	1	0	0	0		100
10926113	Pcaf	Pcaf	p300/CBP-associated factor	696.466	24		633.278	700.745	708.788	709.175	19.8638	39.532	43.3935	52.3442	8.10938	16.1389	17.7153	21.3694	633±8	701±16	709±18	709±21	0.0112591	1649.4	60.2745	1	1	1	0	0	0		100
10801187	Pcdhb11	Pcdhb11	protocadherin beta 11	172.035	24		154.073	183.637	178.703	175.199	9.16709	12.8741	17.2427	9.47997	3.74245	5.25584	7.0393	3.87018	154±4	184±5	179±7	175±4	0.00421005	158.898	18.7081	1	1	1	0	0	0		100
10801199	Pcdhb17	Pcdhb17	protocadherin beta 17	301.09	24		228.674	313.514	345.738	316.169	17.5264	64.7242	20.5612	25.6093	7.15511	26.4236	8.39408	10.455	229±7	314±26	346±8	316±10	0.000112635	1246.62	52.4008	1	1	1	0	0	0		100
10801206	Pcdhb20	Pcdhb20	protocadherin beta 20	317.169	24		268.91	318.552	329.129	346.504	23.0012	28.5013	13.3067	48.6311	9.39019	11.6356	5.43243	19.8536	269±9	319±12	329±5	347±20	0.00267014	979.201	46.4416	1	1	1	0	0	0		100
10801172	Pcdhb4	Pcdhb4	protocadherin beta 4	71.2744	24		55.7644	77.9764	76.6542	75.9193	7.08748	21.153	8.87191	8.45699	2.89345	8.63567	3.62194	3.45255	56±3	78±9	77±4	76±3	0.0154721	146.953	17.9912	1	1	1	0	0	0		100
10708281	Pde8a	Pde8a	phosphodiesterase 8A	619.689	24		538.997	625.995	654.47	649.919	28.7253	96.6122	52.1285	34.6616	11.7271	39.4418	21.2814	14.1505	539±12	626±39	654±21	650±14	0.00750867	3213.44	84.131	1	1	1	0	0	0		100
10757129	Pdgfa	Pdgfa	platelet-derived growth factor alpha polypeptide	579.51	24		533.88	608.177	589.332	597.764	14.191	28.8259	20.9249	21.5915	5.79347	11.7681	8.54257	8.8147	534±6	608±12	589±9	598±9	5.46559e-05	465.837	32.0323	1	1	1	0	0	0		100
10905521	Pdgfb	Pdgfb	platelet-derived growth factor beta polypeptide	232.673	24		218.849	255.919	228.238	228.18	11.1909	32.1872	11.1955	19.4519	4.56866	13.1404	4.57054	7.94122	219±5	256±13	228±5	228±8	0.0345116	383.622	29.0685	1	0	0	0	0	0		100
10827079	Pdlim5	Pdlim5	PDZ and LIM domain 5	531.869	24		493.92	541.677	536.734	521.812	17.4859	23.432	19.5961	25.5223	7.13858	9.56608	8.00007	10.4194	494±7	542±10	537±8	522±10	0.00604941	468.526	32.1246	1	1	0	0	0	0		100
10881293	Pdpn	Pdpn	podoplanin	671.431	24		534.602	640.691	606.35	596.131	33.3903	57.7475	33.486	48.5097	13.6315	23.5753	13.6706	19.804	535±14	641±24	606±14	596±20	0.0056495	1909.8	64.8581	1	1	0	0	0	0		100
10743199	Pemt	Pemt	phosphatidylethanolamine N-methyltransferase	355.819	24		306.176	377.82	349.311	379.122	16.134	41.4929	24.7381	27.1014	6.58666	16.9394	10.0993	11.0641	306±7	378±17	349±10	379±11	0.000792505	785.288	41.5897	1	1	1	0	0	0		100
10899531	Pfdn5	Pfdn5	prefoldin subunit 5	710.675	24		678.154	716.825	717.926	719.869	28.5753	27.9242	14.4578	20.3582	11.6658	11.4	5.90236	8.31118	678±12	717±11	718±6	720±8	0.0164026	543.116	34.5873	1	1	1	0	0	0		100
10796149	Pfkfb3	Pfkfb3	6-phosphofructo-2-kinase/fructose-2,6-biphosphatase 3	494.281	24		473.056	504.797	500.474	473.521	14.2519	26.223	8.68905	29.4057	5.8183	10.7055	3.54729	12.0048	473±6	505±11	500±4	474±12	0.0302114	445.639	31.3301	1	0	0	0	0	0		100
10838003	Phf21a	Phf21a	PHD finger protein 21A	882.831	24		843.281	902.166	886.43	884.812	7.9986	34.2567	25.4973	17.0318	3.26541	13.9852	10.4092	6.95321	843±3	902±14	886±10	885±7	0.00219401	511.314	33.5594	1	1	1	0	0	0		100
10916825	Phldb1	Phldb1	pleckstrin homology-like domain, family B, member 1	360.386	24	Up	333.799	369.431	371.441	374.536	10.8208	22.5114	26.5219	12.5145	4.41758	9.19022	10.8275	5.10902	334±4	369±9	371±11	375±5	0.00477433	363.821	28.3084	1	1	1	0	0	0		100
10763299	Phlpp1	Phlpp1	PH domain and leucine rich repeat protein phosphatase 1	2263.98	24		2138.77	2313.18	2331.36	2291.74	27.8508	115.823	70.3053	93.4518	11.37	47.2847	28.702	38.1515	2139±11	2313±47	2331±29	2292±38	0.00242215	6627.31	120.82	1	1	1	0	0	0		100
10890782	Pigh	Pigh	phosphatidylinositol glycan anchor biosynthesis, class H	373.56	24		356.99	388.246	374.389	374.488	9.61062	12.4783	14.7498	22.0341	3.92352	5.09423	6.02159	8.99537	357±4	388±5	374±6	374±9	0.0285382	242.102	23.0924	1	0	0	0	0	0		100
10937734	Pir	Pir	pirin (iron-binding nuclear protein)	339.987	24		322.681	346.552	354.572	337.09	9.85295	20.7079	9.20789	14.0073	4.02245	8.45398	3.75911	5.71848	323±4	347±8	355±4	337±6	0.00519178	189.77	20.4449	1	1	0	0	0	0		100
10768376	Pla2g4a	Pla2g4a	phospholipase A2, group IVA (cytosolic, calcium-dependent)	154.244	24	Up	122.33	158.009	157.971	146.054	7.39231	30.865	18.9111	12.6115	3.0179	12.6006	7.72042	5.14863	122±3	158±13	158±8	146±5	0.0129197	350.906	27.8014	1	1	0	0	0	0		100
10758830	Plbd2	Plbd2	phospholipase B domain containing 2	507.399	24		470.036	527.296	518.793	502.791	24.5707	19.2788	22.9854	22.0571	10.0309	7.87054	9.38373	9.00477	470±10	527±8	519±9	503±9	0.00196203	504.184	33.3246	1	1	0	0	0	0		100
10814561	Pld1	Pld1	phospholipase D1	242.791	24		211.232	257.909	245.272	242.471	12.2365	16.6654	20.0774	20.1905	4.99551	6.80362	8.19656	8.24275	211±5	258±7	245±8	242±8	0.00203118	311.231	26.1826	1	1	1	0	0	0		100
10887538	Pld4	Pld4	phospholipase D family, member 4	452.077	24		281.065	484.328	431.584	390.294	10.1181	206.14	66.3774	39.9908	4.1307	84.1563	27.0985	16.3262	281±4	484±84	432±27	390±16	0.023497	10553.3	152.463	1	0	0	0	0	0		100
10778558	Plek	Plek	pleckstrin	102.585	24		70.2954	100.095	100.171	89.9683	5.2997	27.778	8.46346	12.0915	2.1636	11.3403	3.45519	4.93632	70±2	100±11	100±3	90±5	0.00951062	227.162	22.3686	1	1	0	0	0	0		100
10882594	Plekhh2	Plekhh2	pleckstrin homology domain containing, family H (with MyTH4 domain) member 2	663.102	24		612.237	697.433	699.938	644.233	34.5588	70.774	35.3187	73.6228	14.1086	28.8934	14.4188	30.0564	612±14	697±29	700±14	644±30	0.0397322	3123.48	82.9449	1	1	0	0	0	0		100
10852144	Pmepa1	Pmepa1	prostate transmembrane protein, androgen induced 1	351.044	24		335.808	366.68	343.886	354.313	12.4682	23.2633	11.2946	19.826	5.09011	9.4972	4.611	8.09393	336±5	367±9	344±5	354±8	0.0409938	291.852	25.3543	1	0	0	0	0	0		100
10923161	Pms1	Pms1	postmeiotic segregation increased 1 (S. cerevisiae)	165.79	24		158.651	174.108	168.572	162.553	6.10247	7.33557	12.8928	6.17605	2.49132	2.99474	5.26348	2.52136	159±2	174±3	169±5	163±3	0.0395963	74.9099	12.8452	1	0	0	0	0	0		100
10820649	Polk	Polk	polymerase (DNA directed) kappa	130.041	24		118.821	135.22	133.041	129.848	10.1357	8.84249	10.1309	5.04946	4.13787	3.60993	4.13592	2.06143	119±4	135±4	133±4	130±2	0.0238008	77.2147	13.0413	1	1	0	0	0	0		100
10819116	Ppa2	Ppa2	pyrophosphatase (inorganic) 2	251.227	24		239.085	266.531	251.779	251.735	6.4283	23.5389	9.01996	10.6664	2.62434	9.60974	3.68238	4.35454	239±3	267±10	252±4	252±4	0.0266742	178.874	19.8493	1	0	0	0	0	0		100
10711454	Ppapdc1a	Ppapdc1a	phosphatidic acid phosphatase type 2 domain containing 1A	294.269	24		253.397	311.001	329.431	294.035	25.3335	43.8439	16.0759	39.3593	10.3423	17.8992	6.56297	16.0683	253±10	311±18	329±7	294±16	0.00486266	1049.26	48.0743	1	1	0	0	0	0		100
10737587	Ppp1r9b	Ppp1r9b	protein phosphatase 1, regulatory subunit 9B	2421.34	24		2366.45	2497.38	2502.2	2398.69	56.5412	57.8107	52.2844	140.33	23.0828	23.6011	21.345	57.2895	2366±23	2497±24	2502±21	2399±57	0.0302398	7446.52	128.07	1	1	0	0	0	0		100
10909918	Ppp2r1b	Ppp2r1b	protein phosphatase 2, regulatory subunit A, beta	354.9	24		336.558	363.269	354.775	351.216	7.63372	17.6049	9.79474	19.0998	3.11645	7.18717	3.99868	7.79746	337±3	363±7	355±4	351±8	0.0372366	201.831	21.0846	1	0	0	0	0	0		100
10889308	Pqlc3	Pqlc3	PQ loop repeat containing 3	80.6743	24		69.529	83.5207	79.0735	85.1294	3.80732	13.9464	5.57656	10.2242	1.55433	5.69359	2.27662	4.174	70±2	84±6	79±2	85±4	0.0330315	80.455	13.3121	1	0	1	0	0	0		100
10818184	Prdx1	Prdx1	peroxiredoxin 1	830.749	24		733.678	877.94	804.918	827.791	35.5724	119.189	37.8403	48.4466	14.5224	48.6588	15.4482	19.7782	734±15	878±49	805±15	828±20	0.0135534	4318.21	97.5265	1	0	0	0	0	0		100
10769218	Prdx6	Prdx6	peroxiredoxin 6	1204.82	24	Up	1113.78	1266.65	1204.09	1242.62	18.1928	83.9061	28.4019	42.7072	7.42717	34.2545	11.595	17.4351	1114±7	1267±34	1204±12	1243±17	0.000167102	2261.51	70.5781	1	1	1	0	0	0		100
10797292	Prelid1	Prelid1	PRELI domain containing 1	1003.74	24		950.746	1059.28	1021.68	1002.41	15.3719	57.7342	39.4586	35.2386	6.27553	23.5699	16.1089	14.3861	951±6	1059±24	1022±16	1002±14	0.00158141	1500.43	57.4882	1	1	0	0	0	0		100
10885235	Prkch	Prkch	protein kinase C, eta	145.138	24	Up	129.049	150.854	137.457	143.384	12.321	5.36358	7.20729	12.7067	5.03004	2.18967	2.94236	5.1875	129±5	151±2	137±3	143±5	0.0137511	102.165	15.0011	1	0	0	0	0	0		100
10887918	Prkd3	Prkd3	protein kinase D3	234.291	24		205.941	248.358	228.006	227.73	9.20257	16.6055	14.7053	15.5356	3.75694	6.77915	6.00341	6.34237	206±4	248±7	228±6	228±6	0.00104215	200.758	21.0284	1	1	1	0	0	0		100
10930660	Pros1	Pros1	protein S (alpha)	180.181	24		146.984	193.736	167.757	167.205	7.23284	30.5196	8.19095	36.1619	2.95279	12.4596	3.34394	14.763	147±3	194±12	168±3	167±15	0.0363471	571.644	35.4841	1	0	0	0	0	0		100
10828046	Prrc2a	Prrc2a	proline-rich coiled-coil 2A	898.172	24		867.666	929.218	912.154	908.513	29.3082	28.1665	51.5438	18.186	11.965	11.4989	21.0426	7.42439	868±12	929±11	912±21	909±7	0.0433945	1179.25	50.9651	1	0	0	0	0	0		100
10911484	Prtg	Prtg	protogenin	113.522	24		104.209	122.444	113.276	119.449	5.99595	14.9412	7.78822	8.09049	2.44784	6.0997	3.17953	3.30293	104±2	122±6	113±3	119±3	0.0208377	89.6459	14.0519	1	0	1	0	0	0		100
10829976	Psap	Psap	prosaposin	5868.01	24	Up	5501.06	6072.44	5827.15	5908.82	68.2396	395.109	86.614	389.863	27.8587	161.303	35.36	159.161	5501±28	6072±161	5827±35	5909±159	0.0181573	76063.4	409.316	1	0	0	0	0	0		100
10852248	Psma7	Psma7	proteasome (prosome, macropain) subunit, alpha type 7	1460.44	24		1411.28	1480.2	1499.18	1453.72	28.7259	45.2686	32.9322	35.2222	11.7273	18.4808	13.4445	14.3794	1411±12	1480±18	1499±13	1454±14	0.00264819	1260.45	52.6906	1	1	0	0	0	0		100
10810727	Psmb10	Psmb10	proteasome (prosome, macropain) subunit, beta type 10	252.071	24		230.733	257.756	261.273	242.099	12.9811	19.6581	8.19345	7.05456	5.29951	8.02537	3.34496	2.88001	231±5	258±8	261±3	242±3	0.00164005	156.463	18.5642	1	1	0	0	0	-1		100
10780396	Psme1	Psme1	proteasome (prosome, macropain) activator subunit 1	768.172	24	Up	661.756	823.621	746.042	764.301	26.6694	100.028	61.695	63.2764	10.8877	40.8362	25.1869	25.8325	662±11	824±41	746±25	764±26	0.00575713	4348.92	97.8727	1	0	1	0	0	0		100
10774830	Psme4	Psme4	proteasome (prosome, macropain) activator subunit 4	592.937	24		564.21	592.696	577.076	602.529	18.6694	13.2361	21.5847	11.3608	7.62174	5.40361	8.81192	4.63804	564±8	593±5	577±9	603±5	0.00494482	285.176	25.0627	1	0	1	0	0	1		100
10802867	Pstpip2	Pstpip2	proline-serine-threonine phosphatase-interacting protein 2	165.502	24		144.602	171.276	176.426	169.227	9.46182	16.1606	9.44644	5.82337	3.86277	6.59752	3.85649	2.37738	145±4	171±7	176±4	169±2	0.000235123	110.948	15.6326	1	1	1	0	0	0		100
10835817	Ptgs1	Ptgs1	prostaglandin-endoperoxide synthase 1	228.414	24		191.914	229.123	250.611	219.169	7.78148	16.0833	18.6198	16.9848	3.17677	6.56596	7.60152	6.93402	192±3	229±7	251±8	219±7	3.10823e-05	237.545	22.8741	1	1	1	0	0	-1		100
10924918	Ptma	Ptma	prothymosin alpha	3290.36	24		3033.66	3314.18	3415.38	3267.97	27.7749	93.3271	102.906	53.8893	11.3391	38.1006	42.0111	22.0002	3034±11	3314±38	3415±42	3268±22	3.65268e-07	5587.65	110.939	1	1	1	0	0	-1		100
10865607	Ptms	Ptms	parathymosin	1112.16	24		1068.22	1171.5	1128.55	1116	22.4013	61.4979	36.2742	72.846	9.14529	25.1064	14.8089	29.7392	1068±9	1171±25	1129±15	1116±30	0.0291867	2670.99	76.7021	1	0	0	0	0	0		100
10721504	Ptov1	Ptov1	prostate tumor overexpressed 1	847.018	24		816.53	875.316	854.589	872.19	16.3888	35.0951	40.0124	29.021	6.69071	14.3275	16.335	11.8478	817±7	875±14	855±16	872±12	0.0171778	972.931	46.2926	1	0	1	0	0	0		100
10758727	Ptpn11	Ptpn11	protein tyrosine phosphatase, non-receptor type 11	2064.19	24		1891.58	2112.44	2107.57	2106.23	50.694	246.553	104.852	32.7909	20.6958	100.655	42.8058	13.3868	1892±21	2112±101	2108±43	2106±13	0.0197164	16650	191.504	1	1	1	0	0	0		100
10768138	Ptprc	Ptprc	protein tyrosine phosphatase, receptor type, C	160.476	24		96.8895	158.414	131.735	126.224	6.00924	53.3493	19.2906	14.2724	2.45326	21.7798	7.87534	5.82666	97±2	158±22	132±8	126±6	0.0138093	760.225	40.9206	1	0	0	0	0	0		100
10711852	Ptpre	Ptpre	protein tyrosine phosphatase, receptor type, E	962.686	24		892.991	992.203	990.657	947.065	51.0771	77.2125	33.9593	64.7957	20.8521	31.5219	13.8638	26.4527	893±21	992±32	991±14	947±26	0.0278535	3350	85.9	1	1	0	0	0	0		100
10832299	Pttg1ip	Pttg1ip	pituitary tumor-transforming 1 interacting protein	993.759	24		893.508	1036.86	974.543	997.268	12.8917	69.4082	49.1491	76.3078	5.26299	28.3358	20.065	31.1525	894±5	1037±28	975±20	997±31	0.00353999	3225.98	84.2949	1	0	1	0	0	0		100
10773080	Qdpr	Qdpr	quinoid dihydropteridine reductase	1427.95	24	Up	1199.52	1435.59	1624.27	1515.6	68.2119	152.574	80.3753	191.566	27.8474	62.2879	32.8131	78.2063	1200±28	1436±62	1624±33	1516±78	0.000191583	17482.5	196.233	1	1	1	0	0	0		100
10741680	Rab11fip3	Rab11fip3	RAB11 family interacting protein 3 (class II)	588.806	24		563.238	613.485	603.641	585.198	22.5453	15.5888	16.9894	40.341	9.20408	6.36409	6.93588	16.4691	563±9	613±6	604±7	585±16	0.0226619	689.14	38.9605	1	1	0	0	0	0		100
10816941	Rab13	Rab13	RAB13, member RAS oncogene family	198.337	24		170.77	203.015	196.726	193.364	8.24562	21.2225	6.66742	3.36285	3.36626	8.66404	2.72196	1.37288	171±3	203±9	197±3	193±1	0.000683422	127.386	16.7507	1	1	1	0	0	0		100
10911524	Rab27a	Rab27a	RAB27A, member RAS oncogene family	186.479	24		163.155	194.989	187.357	183.429	13.1052	28.0824	10.5546	8.12853	5.35016	11.4646	4.3089	3.31846	163±5	195±11	187±4	183±3	0.0214942	257.925	23.8351	1	1	0	0	0	0		100
10713833	Rab3il1	Rab3il1	RAB3A interacting protein (rabin3)-like 1	156.312	24		139.26	163.441	160.183	144.694	13.0049	17.6539	17.0952	7.70547	5.30921	7.20717	6.9791	3.14574	139±5	163±7	160±7	145±3	0.0261404	202.651	21.1274	1	0	0	0	0	0		100
10905316	Rac2	Rac2	ras-related C3 botulinum toxin substrate 2 (rho family, small GTP binding protein Rac2)	198.164	24		129.565	185.206	171.366	158.877	8.79412	41.1353	31.6531	20.3334	3.59018	16.7934	12.9223	8.30107	130±4	185±17	171±13	159±8	0.0188417	749.05	40.6187	1	1	0	0	0	0		100
10742617	Rad50	Rad50	RAD50 homolog (S. cerevisiae)	374.614	24		345.512	385.311	390.567	363.875	23.2432	26.1913	16.8921	15.9212	9.48898	10.6926	6.89618	6.49981	346±9	385±11	391±7	364±6	0.00524038	428.385	30.7176	1	1	0	0	0	0		100
10888404	Rasgrp3	Rasgrp3	RAS guanyl releasing protein 3 (calcium and DAG-regulated)	750.24	24		560.78	729.997	806.894	780.035	14.5839	92.9412	39.438	69.3511	5.95387	37.9431	16.1005	28.3125	561±6	730±38	807±16	780±28	3.40028e-06	3549.49	88.4207	1	1	1	0	0	0		100
10895247	Rassf9	Rassf9	Ras association (RalGDS/AF-6) domain family (N-terminal) member 9	78.0437	24		70.4634	84.123	72.5263	82.0739	3.73101	11.0016	4.91554	10.2192	1.52318	4.49137	2.00676	4.17198	70±2	84±4	73±2	82±4	0.0202011	62.985	11.7785	1	0	0	0	0	0		100
10731611	Rbm25	Rbm25	RNA binding motif protein 25	1896.4	24		1844.07	1960.44	1867.33	1923.67	86.8311	73.4244	52.4823	63.2353	35.4487	29.9754	21.4258	25.8157	1844±35	1960±30	1867±21	1924±26	0.0483826	4896.23	103.849	1	0	0	0	0	0		100
10845130	Rbm43	Rbm43	RNA binding motif protein 43	83.1602	24		73.0671	92.9975	81.2965	85.3478	3.33182	13.4534	7.20381	6.59572	1.36021	5.49234	2.94094	2.69269	73±1	93±5	81±3	85±3	0.00565713	66.1303	12.069	1	0	1	0	0	0		100
10845607	Rbms1	Rbms1	RNA binding motif, single stranded interacting protein 1	263.296	24		226.359	282.077	247.1	267.874	19.8854	51.0727	10.2525	29.1521	8.11817	20.8503	4.18556	11.9013	226±8	282±21	247±4	268±12	0.0306926	904.504	44.6351	1	0	0	0	0	0		100
10899726	Rbms2	Rbms2	RNA binding motif, single stranded interacting protein 2	602.404	24		555.857	639.86	594.826	598.422	12.103	55.0198	20.1273	52.9258	4.94103	22.4617	8.21692	21.6069	556±5	640±22	595±8	598±22	0.0187824	1519.6	57.8542	1	0	0	0	0	0		100
10897912	Rbx1	Rbx1	ring-box 1	635.769	24		620.225	646.781	655.116	631.6	18.0067	26.9209	13.3206	6.25675	7.35121	10.9904	5.4381	2.55431	620±7	647±11	655±5	632±3	0.0114254	294.898	25.4863	1	1	0	0	0	0		100
10909970	Rdx	Rdx	radixin	1424.76	24		1365.55	1454.69	1433.88	1416.03	24.8524	45.3447	33.3789	54.7792	10.1459	18.5119	13.6269	22.3635	1366±10	1455±19	1434±14	1416±22	0.010911	1678.28	60.7999	1	1	0	0	0	0		100
10874166	Rere	Rere	arginine-glutamic acid dipeptide (RE) repeats	1053.29	24		985.74	1106.43	1061.91	1072.58	39.0413	33.907	34.6181	44.6407	15.9385	13.8425	14.1328	18.2245	986±16	1106±14	1062±14	1073±18	0.000375372	1482.94	57.1521	1	1	1	0	0	0		100
10776320	Rest	Rest	RE1-silencing transcription factor	134.796	24		117.728	142.485	129.335	130.769	2.42036	14.6387	6.57257	16.7269	0.98811	5.97622	2.68324	6.82872	118±1	142±6	129±3	131±7	0.0183743	131.652	17.0288	1	0	0	0	0	0		100
10856424	Retsat	Retsat	retinol saturase (all trans retinol 13,14 reductase)	679.761	24		640.042	698.111	667.029	675.175	17.7643	39.375	35.219	29.2615	7.25226	16.0748	14.3781	11.946	640±7	698±16	667±14	675±12	0.0426263	961.182	46.0123	1	0	0	0	0	0		100
10866486	RGD1562378	RGD1562378	histone H4 variant H4-v.1	492.881	24		453.496	528.296	517.575	485.022	31.6173	55.4012	5.56386	11.2598	12.9077	22.6174	2.27143	4.5968	453±13	528±23	518±2	485±5	0.00407734	1001.84	46.9754	1	1	0	0	0	0		100
10800200	Riok3	Riok3	RIO kinase 3 (yeast)	588.811	24		564.423	600.021	607.28	573.828	17.8472	32.2524	21.2605	21.328	7.28609	13.167	8.67956	8.70713	564±7	600±13	607±9	574±9	0.0145684	541.472	34.5349	1	1	0	0	0	0		100
10798108	Ripk1	Ripk1	receptor (TNFRSF)-interacting serine-threonine kinase 1	190.896	24		172.793	194.516	192.299	184.781	9.04287	11.633	6.17484	10.4372	3.69174	4.74914	2.52087	4.26097	173±4	195±5	192±3	185±4	0.00401338	88.71	13.9784	1	1	0	0	0	0		100
10722918	Rlbp1	Rlbp1	retinaldehyde binding protein 1	278.313	24		246.242	298.777	299.483	280.757	19.2687	38.5245	29.2622	17.4629	7.86641	15.7276	11.9462	7.12919	246±8	299±16	299±12	281±7	0.00958212	715.743	39.7054	1	1	0	0	0	0		100
10780937	Rnaseh2b	Rnaseh2b	ribonuclease H2, subunit B	173.327	24		160.114	174.938	166.982	179.742	6.31832	6.45515	11.1044	8.15993	2.57944	2.6353	4.53336	3.33128	160±3	175±3	167±5	180±3	0.00350055	69.2497	12.3504	1	0	1	0	0	1		100
10850613	Rnaset2	Rnaset2	ribonuclease T2	660.017	24		447.359	654.69	589.322	628.261	18.8394	109.104	33.4105	54.1759	7.69116	44.5414	13.6398	22.1172	447±8	655±45	589±14	628±22	6.13952e-05	3665.55	89.8547	1	1	1	0	0	0		100
10758991	Rnf10	Rnf10	ring finger protein 10	1320.63	24		1282.77	1366.34	1342.78	1310.71	36.4112	23.7574	55.1073	40.9389	14.8648	9.69893	22.4974	16.7132	1283±15	1366±10	1343±22	1311±17	0.0169681	1707.92	61.3345	1	0	0	0	0	0		100
10800434	Rnf125	Rnf125	ring finger protein 125	89.3675	24		76.3466	91.2664	94.1909	88.8779	5.0636	9.34151	5.15955	12.2669	2.06721	3.81365	2.10638	5.00795	76±2	91±4	94±2	89±5	0.00931828	71.7235	12.569	1	1	0	0	0	0		100
10702342	Rnf217	Rnf217	ring finger protein 217	151.627	24		135.929	156.364	152.552	150.188	5.90042	14.7165	10.8712	4.4499	2.40884	6.00799	4.43815	1.81666	136±2	156±6	153±4	150±2	0.00988709	91.0684	14.163	1	1	1	0	0	0		100
10876479	Rnf38	Rnf38	ring finger protein 38	642.909	24		618.583	655.989	653.474	640.133	19.26	17.265	13.157	20.2159	7.86285	7.04841	5.37133	8.25312	619±8	656±7	653±5	640±8	0.00741578	313.474	26.2767	1	1	0	0	0	0		100
10936480	Rpl12	Rpl12	ribosomal protein L12	3980.26	24		3672.85	4029.63	4072.11	3919.08	56.4798	93.218	88.2912	89.765	23.0578	38.0561	36.0447	36.6464	3673±23	4030±38	4072±36	3919±37	3.96524e-07	6840.72	122.75	1	1	1	0	0	-1		100
10914366	Rpl14	Rpl14	ribosomal protein L14	2483.2	24		2382.32	2511.33	2453.57	2487.45	40.4364	57.5984	105.794	52.7663	16.5081	23.5144	43.1901	21.5418	2382±17	2511±24	2454±43	2487±22	0.0289687	4806.77	102.896	1	0	1	0	0	0		100
10706963	Rpl18	Rpl18	ribosomal protein L18	2061.14	24		1875.19	2127.93	2103.66	2046.39	51.4809	108.114	137.658	51.9776	21.017	44.1372	56.1987	21.2198	1875±21	2128±44	2104±56	2046±21	0.000879226	8855.94	139.665	1	1	1	0	0	0		100
10737920	Rpl19	Rpl19	ribosomal protein L19	3069.48	24	Up	2898.33	3059.15	3105.57	3056.34	56.2025	141.604	119.647	89.2398	22.9446	57.8097	48.8456	36.432	2898±23	3059±58	3106±49	3056±36	0.0153775	10915.6	155.058	1	1	1	0	0	0		100
10874330	Rpl22	Rpl22	ribosomal protein L22	1823.65	24		1713.65	1848.65	1823.54	1794.4	61.2885	60.9696	42.1301	44.3474	25.0209	24.8907	17.1995	18.1047	1714±25	1849±25	1824±17	1794±18	0.00213021	2755.72	77.9092	1	1	1	0	0	0		100
10776237	Rpl23a	Rpl23a	ribosomal protein L23a	2570.77	24		2415.68	2625.84	2539.23	2570.05	101.21	112.522	50.8333	77.8465	41.3189	45.9369	20.7526	31.7807	2416±41	2626±46	2539±21	2570±32	0.00522972	7635.95	129.689	1	0	1	0	0	0		100
10717434	Rpl26	Rpl26	ribosomal protein L26	2485.78	24		2283.91	2530.52	2498.96	2488.09	78.1488	116.005	56.0886	54.7291	31.9041	47.359	22.8981	22.3431	2284±32	2531±47	2499±23	2488±22	0.000114264	6056.38	115.499	1	1	1	0	0	0		100
10709779	Rpl27a	Rpl27a	ribosomal protein L27a	1931.54	24		1840.08	1958.38	1931.06	1936.13	72.0018	74.8432	48.9206	60.1009	29.3946	30.5546	19.9717	24.5361	1840±29	1958±31	1931±20	1936±25	0.0267721	4123.89	95.3069	1	0	1	0	0	0		100
10844883	Rpl35	Rpl35	ribosomal protein L35	3035.18	24		2892.06	3063.4	3069.63	3025.19	41.1475	66.4211	56.2774	75.6209	16.7984	27.1163	22.9751	30.8721	2892±17	3063±27	3070±23	3025±31	0.000229304	3712.68	90.4305	1	1	1	0	0	0		100
10760018	Rpl35a	Rpl35a	ribosomal protein L35a	2282.16	24		2151.29	2311.1	2316.42	2290.91	100.327	140.753	65.8598	50.8383	40.9582	57.462	26.8871	20.7547	2151±41	2311±57	2316±27	2291±21	0.0199064	8641.19	137.961	1	1	1	0	0	0		100
10710846	Rpl36	Rpl36	ribosomal protein L36	1710.76	24		1634.77	1739.74	1716.48	1716.88	60.6348	76.0092	44.8748	28.0422	24.7541	31.0306	18.32	11.4482	1635±25	1740±31	1716±18	1717±11	0.0194811	2920.69	80.2072	1	1	1	0	0	0		100
10934940	Rpl36a	Rpl36a	ribosomal protein L36a	1933.28	24		1770.64	1927.18	1964.85	1936.74	76.4745	68.2587	52.8099	92.469	31.2206	27.8665	21.5596	37.7503	1771±31	1927±28	1965±22	1937±38	0.000975018	5503.99	110.106	1	1	1	0	0	0		100
10796677	Rpl37	Rpl37	ribosomal protein L37	2509.32	24		2328.42	2547.97	2546.88	2534.6	101.55	47.1465	21.5927	37.2363	41.4576	19.2475	8.81518	15.2017	2328±41	2548±19	2547±9	2535±15	7.07502e-06	3669.32	89.9008	1	1	1	0	0	0		100
10924217	Rpl37a	Rpl37a	ribosomal protein L37a	2094.84	24		1962.31	2173.64	2132.87	2079.9	58.0477	95.912	69.6679	35.4636	23.6979	39.1559	28.4418	14.478	1962±24	2174±39	2133±28	2080±14	0.000232191	4431.61	98.7988	1	1	1	0	0	0		100
10879915	Rpl37a-ps1	Rpl37a-ps1	ribosomal protein L37a, pseudogene 1	5368.56	24		5123.22	5380.22	5415.56	5434.97	117.243	201.172	200.274	87.7018	47.8642	82.1281	81.7617	35.8041	5123±48	5380±82	5416±82	5435±36	0.00931769	24716.7	233.327	1	1	1	0	0	0		100
10739395	Rpl38	Rpl38	ribosomal protein L38	2163.53	24		1959.33	2234.2	2239.41	2192.02	112.515	66.8393	95.7577	85.5011	45.934	27.287	39.0929	34.9057	1959±46	2234±27	2239±39	2192±35	0.000118529	8608.84	137.703	1	1	1	0	0	0		100
10776291	Rpl39	Rpl39	ribosomal protein L39	2060.18	24		1928.36	2041.81	2040.43	2062.04	76.2809	110.516	59.6502	34.1886	31.1415	45.1178	24.3521	13.9574	1928±31	2042±45	2040±24	2062±14	0.0212013	5346.51	108.519	1	1	1	0	0	0		100
10775130	Rpl5	Rpl5	ribosomal protein L5	3909.03	24	Up	3578.56	3899.42	4120.29	3835.01	120.515	226.592	134.125	183.271	49.2002	92.5058	54.7561	74.8201	3579±49	3899±93	4120±55	3835±75	0.000263942	28204.4	249.247	1	1	1	0	0	-1		100
10762658	Rplp0	Rplp0	ribosomal protein, large, P0	1786.13	24		1653.66	1790.03	1730.48	1774.57	63.892	44.741	45.7538	76.0267	26.0838	18.2654	18.6789	31.0378	1654±26	1790±18	1730±19	1775±31	0.00465792	3567.65	88.6466	1	0	1	0	0	0		100
10841602	Rpn2	Rpn2	ribophorin II	1312.61	24		1259.99	1355.18	1285.67	1320.11	44.9049	55.6251	35.1106	60.7151	18.3323	22.7088	14.3338	24.7868	1260±18	1355±23	1286±14	1320±25	0.0272191	2476.54	73.8573	1	0	0	0	0	0		100
10831874	Rps10	Rps10	ribosomal protein S10	1241.12	24		1163.93	1237.29	1263.13	1253.38	23.278	38.1652	51.1116	38.5659	9.50321	15.5809	20.8662	15.7445	1164±10	1237±16	1263±21	1253±16	0.00125828	1528.12	58.0162	1	1	1	0	0	0		100
10721676	Rps11	Rps11	ribosomal protein S11	1353.63	24		1250.19	1371.81	1351.73	1310.12	61.8378	53.7375	32.249	47.7209	25.2452	21.9382	13.1656	19.482	1250±25	1372±22	1352±13	1310±19	0.00305323	2487.2	74.0161	1	1	0	0	0	0		100
10839876	Rps12	Rps12	ribosomal protein S12	3123.43	24		2906.57	3114.77	3069.65	3120.78	125.484	75.0755	77.9213	54.0434	51.2286	30.6494	31.8112	22.0631	2907±51	3115±31	3070±32	3121±22	0.00149127	7696.76	130.204	1	1	1	0	0	0		100
10725105	Rps13	Rps13	ribosomal protein S13	592.502	24		555.507	594.459	592.479	599.546	22.7352	35.8833	19.2424	16.9571	9.28159	14.6493	7.85568	6.9227	556±9	594±15	592±8	600±7	0.0197747	580.207	35.7489	1	1	1	0	0	0		100
10927281	Rps14	Rps14	ribosomal protein S14	947.754	24		896.074	973.518	949.9	931.311	26.6451	66.3942	42.5859	24.9104	10.8778	27.1053	17.3856	10.1696	896±11	974±27	950±17	931±10	0.0390783	1755.42	62.1816	1	0	0	0	0	0		100
10705511	Rps16	Rps16	ribosomal protein S16	1682.28	24		1575.19	1698.82	1694.8	1697.1	77.428	117.24	43.5724	30.6096	31.6099	47.8631	17.7884	12.4963	1575±32	1699±48	1695±18	1697±12	0.0195178	5217.58	107.203	1	1	1	0	0	0		100
10723233	Rps17	Rps17	ribosomal protein S17	1736.02	24	Up	1604.9	1708.02	1744.27	1776.55	55.7086	72.4819	80.4888	37.4633	22.743	29.5906	32.8594	15.2943	1605±23	1708±30	1744±33	1777±15	0.000970406	3996.92	93.8282	1	1	1	0	0	0		100
10704411	Rps19	Rps19	ribosomal protein S19	912.948	24		841.435	928.327	939.011	907.787	37.2343	11.3541	18.9542	43.2378	15.2008	4.6353	7.73802	17.6518	841±15	928±5	939±8	908±18	0.000156332	978.499	46.4249	1	1	1	0	0	0		100
10872531	Rps20	Rps20	ribosomal protein S20	3358.31	24		3131.46	3395.19	3367.17	3398.33	66.0301	120.255	80.796	97.3355	26.9567	49.0938	32.9848	39.737	3131±27	3395±49	3367±33	3398±40	0.000153528	8402.93	136.046	1	1	1	0	0	0		100
10786132	Rps24	Rps24	ribosomal protein S24	1013.1	24	Up	909.122	1029.47	1036.9	1000.47	39.6369	102.144	17.3702	17.2747	16.1817	41.7	7.09135	7.05235	909±16	1029±42	1037±7	1000±7	0.00186764	2767.87	78.0806	1	1	1	0	0	0		100
10878910	Rps26	Rps26	ribosomal protein S26	4075.79	24		3859.74	4103.89	4117.09	4061	187.087	34.9661	93.8649	38.0174	76.3779	14.2749	38.3202	15.5205	3860±76	4104±14	4117±38	4061±16	0.00245384	12167.2	163.707	1	1	1	0	0	0		100
10824596	Rps27	Rps27	ribosomal protein S27	558.166	24		483.888	561.263	561.799	577.639	46.8644	43.685	52.149	31.1884	19.1323	17.8343	21.2897	12.7326	484±19	561±18	562±21	578±13	0.00718916	1951.37	65.5602	1	1	1	0	0	0		100
10896225	Rps29	Rps29	ribosomal protein S29	12834.2	24	Up	12484	12870.5	12963.1	12959.5	315.509	267.616	227.45	135.695	128.806	109.254	92.8561	55.3973	12484±129	12871±109	12963±93	12960±55	0.00869227	59733.6	362.727	1	1	1	0	0	0		100
10824082	Rps3a	Rps3a	ribosomal protein S3a	2998.5	24	Up	2826.72	2937.96	2987.91	3033.98	71.8358	96.7125	39.427	79.0537	29.3268	39.4827	16.096	32.2735	2827±29	2938±39	2988±16	3034±32	0.000709203	5380.79	108.866	1	1	1	0	0	0		100
10938722	Rps4x	Rps4x	ribosomal protein S4, X-linked	3790.71	24		3592.82	3799.42	3765.8	3751.19	108.926	95.0889	56.7302	75.3717	44.4687	38.8199	23.16	30.7704	3593±44	3799±39	3766±23	3751±31	0.00298248	7367.77	127.391	1	1	1	0	0	0		100
10877916	Rps6	Rps6	ribosomal protein S6	2585.26	24		2406.15	2603.11	2658.57	2534.97	53.3925	91.5643	41.3235	72.6554	21.7974	37.381	16.8703	29.6615	2406±22	2603±37	2659±17	2535±30	1.88701e-05	4353.79	97.9275	1	1	1	0	0	-1		100
10718510	Rps9	Rps9	ribosomal protein S9	1886.19	24		1740.73	1918.59	1929.51	1869.79	67.6677	62.5255	100.585	53.1702	27.6252	25.5259	41.0635	21.7066	1741±28	1919±26	1930±41	1870±22	0.00112477	5434.42	109.408	1	1	1	0	0	0		100
10914308	Rpsa	Rpsa	ribosomal protein SA	1575.23	24		1438.06	1620.95	1605.86	1511.45	100.332	70.0523	97.8702	66.7193	40.9603	28.5987	39.9553	27.238	1438±41	1621±29	1606±40	1511±27	0.0058891	7374.31	127.448	1	1	0	0	0	0		100
10871792	Rragc	Rragc	Ras-related GTP binding C	437.209	24		417.078	441.358	449.839	430.903	8.64631	16.3833	5.67193	9.58546	3.52984	6.68847	2.31555	3.91325	417±4	441±7	450±2	431±4	0.000223443	108.827	15.4824	1	1	0	0	0	-1		100
10706705	Rras	Rras	related RAS viral (r-ras) oncogene homolog	240.646	24		212.8	236.598	233.826	235.097	8.75973	13.1451	18.4891	6.31074	3.57614	5.36645	7.54813	2.57635	213±4	237±5	234±8	235±3	0.0125964	157.01	18.5966	1	1	1	0	0	0		100
10850362	Rrbp1	Rrbp1	ribosome binding protein 1	675.454	24		622.947	678.062	671.875	678.513	18.8213	41.8651	20.5402	36.6764	7.68377	17.0913	8.38548	14.9731	623±8	678±17	672±8	679±15	0.014477	927.222	45.1921	1	1	1	0	0	0		100
10831105	RT1-CE1	RT1-CE1	RT1 class I, locus1	174.732	24		153.363	181.7	167.683	179.672	6.83136	17.4626	4.44982	18.2138	2.78889	7.12908	1.81663	7.43574	153±3	182±7	168±2	180±7	0.0054671	168.991	19.2931	1	0	1	0	0	0		100
10828001	RT1-CE10	RT1-CE10	RT1 class I, locus CE10	161.947	24		146.527	167.228	150.219	169.912	12.3452	21.8383	11.0854	6.30224	5.03989	8.91544	4.52559	2.57288	147±5	167±9	150±5	170±3	0.0161501	183.299	20.0933	1	0	1	0	0	0		100
10831620	RT1-DMb	RT1-DMb	RT1 class II, locus DMb	218.253	24		152.297	220.626	195.024	184.59	13.121	65.0424	8.14385	23.9818	5.35661	26.5534	3.32471	9.79053	152±5	221±27	195±3	185±10	0.0286657	1162.43	50.6004	1	0	0	0	0	0		100
10827691	RT1-M6-2	RT1-M6-2	RT1 class I, locus M6, gene 2	375.604	24		335.843	402.227	403.008	368.103	40.683	55.3065	33.6978	40.2793	16.6088	22.5788	13.7571	16.444	336±17	402±23	403±14	368±16	0.0427498	1805.29	63.0587	1	1	0	0	0	0		100
10755088	Rtp4	Rtp4	receptor (chemosensory) transporter protein 4	69.6938	24		63.6005	73.8171	66.7475	65.4719	3.34672	8.59319	4.62545	5.75183	1.36629	3.50816	1.88833	2.34818	64±1	74±4	67±2	65±2	0.0465366	32.8298	8.50364	1	0	0	0	0	0		100
10817046	S100a16	S100a16	S100 calcium binding protein A16	312.816	24		287.356	311.655	317.999	321.995	9.42674	8.99162	7.86823	14.7213	3.84845	3.67082	3.21219	6.00994	287±4	312±4	318±3	322±6	8.68722e-05	113.728	15.8272	1	1	1	0	0	0		100
10797566	S1pr3	S1pr3	sphingosine-1-phosphate receptor 3	139.62	24		103.46	139.296	127.807	121.241	9.4492	25.9403	8.36405	12.5856	3.85762	10.5901	3.41461	5.13806	103±4	139±11	128±3	121±5	0.006489	225.253	22.2744	1	1	0	0	0	0		100
10806314	Sall1	Sall1	sal-like 1 (Drosophila)	330.811	24		260.098	325.283	333.891	308.244	9.68273	44.0588	23.8518	29.7981	3.95296	17.9869	9.73744	12.165	260±4	325±18	334±10	308±12	0.0013271	816.718	42.4138	1	1	1	0	0	0		100
10779654	Samd4a	Samd4a	sterile alpha motif domain containing 4A	394.156	24		359.727	407.411	391.27	408.715	26.2089	39.8682	10.9888	20.5119	10.6997	16.2761	4.48618	8.37396	360±11	407±16	391±4	409±8	0.0138039	657.889	38.0669	1	0	1	0	0	0		100
10780803	Sap18	Sap18	Sin3-associated polypeptide 18	1086.46	24		1056.57	1109.76	1118.82	1068.95	43.7216	35.7721	37.83	21.2823	17.8493	14.6039	15.444	8.68847	1057±18	1110±15	1119±15	1069±9	0.018627	1268.25	52.8534	1	1	0	0	0	0		100
10757956	Sbds	Sbds	Shwachman-Bodian-Diamond syndrome	1821.3	24		1732.56	1817.25	1854.66	1849.23	46.8368	52.4787	39.1984	75.9045	19.1211	21.4243	16.0027	30.9879	1733±19	1817±21	1855±16	1849±31	0.00407394	3077.61	82.3336	1	1	1	0	0	0		100
10910349	Scamp2	Scamp2	secretory carrier membrane protein 2	272.954	24		248.355	281.567	265.028	263.99	13.8835	17.638	8.62235	13.0793	5.66791	7.20069	3.52006	5.33962	248±6	282±7	265±4	264±5	0.00651042	180.801	19.9559	1	0	0	0	0	0		100
10771622	Scarb2	Scarb2	scavenger receptor class B, member 2	1511.24	24		1422.16	1534.09	1495.28	1523.21	35.8868	60.8985	16.2016	60.453	14.6507	24.8617	6.61426	24.6798	1422±15	1534±25	1495±7	1523±25	0.00260918	2150.48	68.8238	1	1	1	0	0	0		100
10822989	Sclt1	Sclt1	sodium channel and clathrin linker 1	322.898	24		302.491	327.707	336.302	329.691	18.5872	21.7542	14.8895	4.91636	7.58817	8.88113	6.07862	2.0071	302±8	328±9	336±6	330±2	0.00893164	255.25	23.7112	1	1	1	0	0	0		100
10734486	Sco1	Sco1	SCO cytochrome oxidase deficient homolog 1 (yeast)	156.732	24		147.743	160.292	161.813	158.289	6.72545	8.89694	2.5193	7.5752	2.74565	3.63216	1.0285	3.09256	148±3	160±4	162±1	158±3	0.00815038	45.3386	9.99321	1	1	1	0	0	0		100
10904714	Scrib	Scrib	scribbled homolog (Drosophila)	233.039	24		219.783	244.366	238.316	231.633	6.48083	18.02	10.5372	5.87505	2.64579	7.35665	4.3018	2.39848	220±3	244±7	238±4	232±2	0.00791699	117.718	16.1024	1	1	0	0	0	0		100
10851599	Sdc4	Sdc4	syndecan 4	915.31	24	Up	857.142	919.131	905.129	896.128	11.4654	29.644	34.8568	42.249	4.68074	12.1021	14.2302	17.2481	857±5	919±12	905±14	896±17	0.0232697	1009.06	47.1444	1	1	0	0	0	0		100
10874820	Sdf4	Sdf4	stromal cell derived factor 4	576.619	24		547.299	595.621	577.73	571.22	13.8001	25.197	18.8778	21.1108	5.63389	10.2866	7.70682	8.61846	547±6	596±10	578±8	571±9	0.0062619	394.84	29.4905	1	1	0	0	0	0		100
10802324	Sec11c	Sec11c	SEC11 homolog C (S. cerevisiae)	1810.93	24		1692.96	1856.05	1902.08	1827.46	70.2427	51.5648	68.1137	66.3884	28.6765	21.0512	27.8073	27.1029	1693±29	1856±21	1902±28	1827±27	0.000174695	4238.97	96.6275	1	1	1	0	0	0		100
10830583	Sec63	Sec63	SEC63 homolog (S. cerevisiae)	1025.52	24		978.77	1037.56	1030.77	1034.34	24.7112	46.8898	26.8031	45.2565	10.0883	19.1427	10.9423	18.4759	979±10	1038±19	1031±11	1034±18	0.0400402	1351.61	54.5628	1	0	1	0	0	0		100
10773716	Selm	Selm	selenoprotein M	988.742	24		937.983	1065.07	1014.96	984.434	41.4754	102.301	44.8695	56.9196	16.9323	41.7643	18.3179	23.2373	938±17	1065±42	1015±18	984±23	0.0256449	4038.36	94.3133	1	0	0	0	0	0		100
10759173	Selplg	Selplg	selectin P ligand	771.546	24		606.228	815.478	825.779	733.666	26.6577	172.435	56.363	94.3012	10.8829	70.3961	23.0101	38.4983	606±11	815±70	826±23	734±38	0.00394744	9622.92	145.588	1	1	0	0	0	0		100
10930749	Sept10	Sept10	septin 10	168.149	24		148.056	177.473	170.418	165.227	9.30051	13.3084	13.5118	15.5323	3.79692	5.43312	5.51615	6.34102	148±4	177±5	170±6	165±6	0.00862687	171.581	19.4404	1	1	0	0	0	0		100
10839170	Serf2	Serf2	small EDRK-rich factor 2	369.839	24		325.755	402.198	375.799	366.151	21.9351	34.8509	11.6894	28.9227	8.95495	14.2278	4.77219	11.8076	326±9	402±14	376±5	366±12	0.000727178	638.415	37.4992	1	1	1	0	0	0		100
10794836	Serpinb6	Serpinb6	serpin peptidase inhibitor, clade B (ovalbumin), member 6	230.404	24		210.812	246.837	233.025	231.054	13.8286	14.8088	12.4178	3.91686	5.64552	6.04565	5.06955	1.59905	211±6	247±6	233±5	231±2	0.000767091	141.109	17.6298	1	1	1	0	0	0		100
10798135	Serpinb9	Serpinb9	serpin peptidase inhibitor, clade B (ovalbumin), member 9	183.098	24		159.006	199.063	179.796	179.516	18.5442	34.2721	4.6959	14.9068	7.57063	13.9915	1.91709	6.08566	159±8	199±14	180±2	180±6	0.0310168	402.055	29.7587	1	0	0	0	0	0		100
10846854	Serping1	Serping1	serpin peptidase inhibitor, clade G, member 1	366.627	24	Up	195.85	351.937	287.819	295.887	11.6813	88.9659	38.9164	38.0141	4.76885	36.3202	15.8876	15.5192	196±5	352±36	288±16	296±16	0.000496186	2481.04	73.9244	1	1	1	0	0	0		100
10701797	Sf3b5	Sf3b5	splicing factor 3b, subunit 5	342.836	24		313.199	357.725	361.022	341.126	14.3343	20.989	17.0911	11.111	5.85197	8.56872	6.97742	4.53606	313±6	358±9	361±7	341±5	0.000218373	256.175	23.7541	1	1	1	0	0	0		100
10769501	Sft2d2	Sft2d2	SFT2 domain containing 2	120.058	24		106.16	126.155	111.426	130.947	3.24282	18.7478	7.22376	16.8667	1.32388	7.65375	2.94909	6.8858	106±1	126±8	111±3	131±7	0.010827	165.36	19.0847	1	0	1	0	0	1		100
10826846	Sgms2	Sgms2	sphingomyelin synthase 2	162.623	24		138.368	190.883	155.614	165.886	6.38825	45.1515	14.2617	24.2041	2.60799	18.433	5.82233	9.88128	138±3	191±18	156±6	166±10	0.0222167	647.623	37.7687	1	0	0	0	0	0		100
10880436	Sh3bgrl3	Sh3bgrl3	SH3 domain binding glutamic acid-rich protein-like 3	1522.9	24		1408.14	1548.48	1636.95	1487.25	42.9273	65.9321	80.9118	104.513	17.525	26.9167	33.0321	42.6674	1408±18	1548±27	1637±33	1487±43	0.000532906	5997.41	114.935	1	1	0	0	0	-1		100
10816179	Sh3d19	Sh3d19	SH3 domain containing 19	236.826	24		214.2	254.531	228.807	237.093	7.74776	20.1034	12.479	30.124	3.16301	8.20718	5.09451	12.2981	214±3	255±8	229±5	237±12	0.0217409	380.665	28.9563	1	0	0	0	0	0		100
10827138	Sh3glb1	Sh3glb1	SH3-domain GRB2-like endophilin B1	885.731	24		800.031	882.907	889.123	880.929	27.8072	33.1935	32.8162	34.6846	11.3522	13.5512	13.3972	14.1599	800±11	883±14	889±13	881±14	0.000315094	1035.42	47.7562	1	1	1	0	0	0		100
10706515	Shank1	Shank1	SH3 and multiple ankyrin repeat domains 1	2410.57	24		2324.36	2559.96	2526.08	2389.6	84.7925	159.715	130.884	107.001	34.6164	65.2033	53.4333	43.6829	2324±35	2560±65	2526±53	2390±44	0.0121838	14783.3	180.45	1	1	0	0	0	0		100
10898622	Shank3	Shank3	SH3 and multiple ankyrin repeat domains 3	921.168	24		883.372	967.175	949.91	932.582	29.7279	43.2172	39.4299	62.4352	12.1364	17.6434	16.0972	25.4891	883±12	967±18	950±16	933±25	0.0324066	2060.74	67.3725	1	0	0	0	0	0		100
10816791	Shc1	Shc1	SHC (Src homology 2 domain containing) transforming protein 1	214.198	24		180.907	218.472	212.799	200.932	13.6157	20.9058	6.60545	8.9967	5.55859	8.53475	2.69666	3.67289	181±6	218±9	213±3	201±4	0.000615818	173.579	19.5533	1	1	1	0	0	0		100
10727924	Sipa1	Sipa1	signal-induced proliferation-associated 1	357.544	24		312.372	370.912	329.781	341.866	12.2535	58.4019	24.5969	20.2343	5.00247	23.8425	10.0417	8.26064	312±5	371±24	330±10	342±8	0.0466853	1024.53	47.5043	1	0	0	0	0	0		100
10862527	Skap2	Skap2	src kinase associated phosphoprotein 2	285.098	24		216.335	299.166	296.02	258.627	11.8306	74.3453	24.9649	11.8797	4.82982	30.3514	10.1919	4.84987	216±5	299±30	296±10	259±5	0.00408867	1401.61	55.5628	1	1	0	0	0	0		100
10805335	Slc14a1	Slc14a1	solute carrier family 14 (urea transporter), member 1	700.229	24		597.389	650.876	695.862	669.349	24.3008	43.7378	28.9749	29.3338	9.92075	17.8559	11.8289	11.9755	597±10	651±18	696±12	669±12	0.000296426	1005.51	47.0613	1	1	1	0	0	0		100
10713974	Slc15a3	Slc15a3	solute carrier family 15, member 3	112.244	24		79.5705	112.333	107.479	107.833	7.15574	17.2954	12.3867	7.23392	2.92132	7.06081	5.05684	2.95323	80±3	112±7	107±5	108±3	0.000354546	130.597	16.9604	1	1	1	0	0	0		100
10762304	Slc24a6	Slc24a6	solute carrier family 24 (sodium/potassium/calcium exchanger), member 6	147.238	24		130.187	153.504	147.148	147.303	6.96812	9.81124	5.40527	7.70713	2.84472	4.00542	2.20669	3.14642	130±3	154±4	147±2	147±3	0.000324995	56.3631	11.1421	1	1	1	0	0	0		100
10833005	Slc29a3	Slc29a3	solute carrier family 29 (nucleoside transporters), member 3	466.722	24		430.808	469.677	472.274	449.418	20.2262	26.0986	21.854	22.4529	8.2573	10.6547	8.92185	9.16637	431±8	470±11	472±9	449±9	0.0178903	509.405	33.4967	1	1	0	0	0	0		100
10826238	Slc30a7	Slc30a7	solute carrier family 30 (zinc transporter), member 7	414.205	24		389.042	426.481	416.103	403.562	15.0868	28.5567	9.25067	26.5835	6.15918	11.6582	3.77657	10.8527	389±6	426±12	416±4	404±11	0.04212	440.068	31.1337	1	0	0	0	0	0		100
10749594	Slc38a10	Slc38a10	solute carrier family 38, member 10	348.423	24		333.135	354.442	359.659	345.132	8.17302	4.9924	19.8254	16.347	3.33662	2.03814	8.0937	6.67363	333±3	354±2	360±8	345±7	0.0217515	196.581	20.8086	1	1	0	0	0	0		100
10837366	Slc43a3	Slc43a3	solute carrier family 43, member 3	188.702	24		152.626	171.726	172.329	163.526	5.62012	6.43582	10.784	6.92242	2.29441	2.62741	4.40256	2.82607	153±2	172±3	172±4	164±3	0.00106326	60.2465	11.5196	1	1	0	0	0	0		100
10717440	Slc9a3	Slc9a3	solute carrier family 9 (sodium/hydrogen exchanger), member 3	199.5	24		158.621	211.157	215.387	216.374	13.1615	25.3581	12.2004	14.354	5.37317	10.3524	4.98078	5.85998	159±5	211±10	215±5	216±6	1.35094e-05	274.352	24.5824	1	1	1	0	0	0		100
10867033	Slco1a2	Slco1a2	solute carrier organic anion transporter family, member 1A2	490.621	24		440.491	517.917	498.162	484.158	37.345	47.4907	31.9303	21.7278	15.246	19.388	13.0355	8.87032	440±15	518±19	498±13	484±9	0.0105315	1234.36	52.1426	1	1	0	0	0	0		100
10723902	Slco2b1	Slco2b1	solute carrier organic anion transporter family, member 2b1	372.674	24		307.929	387.189	353.171	357.187	15.4439	71.9423	17.8009	19.1599	6.30496	29.3703	7.26718	7.82199	308±6	387±29	353±7	357±8	0.0153645	1332.38	54.1733	1	0	0	0	0	0		100
10730206	Slit1	Slit1	slit homolog 1 (Drosophila)	1620.52	24		1555.19	1718.98	1682.83	1593.91	87.286	158.417	38.5501	82.7382	35.6344	64.6735	15.738	33.7777	1555±36	1719±65	1683±16	1594±34	0.0382344	9480.88	144.509	1	0	0	0	0	0		100
10830230	Smpdl3a	Smpdl3a	sphingomyelin phosphodiesterase, acid-like 3A	401.797	24		357.153	404.323	405.444	415.243	20.8904	50.6658	25.9015	17.0809	8.52848	20.6842	10.5743	6.97326	357±9	404±21	405±11	415±7	0.0156845	908.598	44.7359	1	1	1	0	0	0		100
10824680	Snapap	Snapap	SNAP-associated protein	671.759	24		632.082	684.721	680.504	676.4	30.8829	26.4154	21.2745	29.6243	12.6079	10.7841	8.68527	12.0941	632±13	685±11	681±9	676±12	0.0130485	747.943	40.5887	1	1	1	0	0	0		100
10856965	Snrpg	Snrpg	small nuclear ribonucleoprotein polypeptide G	227.491	24		212.325	234.991	224.909	232.183	8.21214	11.6547	10.3043	15.1426	3.35259	4.75799	4.2067	6.18194	212±3	235±5	225±4	232±6	0.0169685	134.626	17.2201	1	0	1	0	0	0		100
10807601	Sntb2	Sntb2	syntrophin, beta 2	359.819	24		309.274	398.573	363.311	372.375	22.8146	87.3117	20.0101	33.7078	9.31402	35.6448	8.16909	13.7612	309±9	399±36	363±8	372±14	0.0297488	2146.26	68.7562	1	0	0	0	0	0		100
10918326	Snx1	Snx1	sorting nexin 1	491.609	24		445.633	510.304	506.276	486.302	18.0353	60.7058	16.9684	13.2756	7.36287	24.783	6.92733	5.41976	446±7	510±25	506±7	486±5	0.00895492	983.578	46.5452	1	1	0	0	0	0		100
10938649	Snx12	Snx12	sorting nexin 12	593.695	24		560.199	606.25	644.346	576.891	36.6585	21.5178	38.0353	22.2553	14.9658	8.7846	15.5279	9.08569	560±15	606±9	644±16	577±9	0.000892901	962.169	46.0359	1	1	0	0	0	-1		100
10833823	Sobp	Sobp	sine oculis-binding protein homolog (Drosophila)	714.947	24		695.164	745.483	743.986	700.649	19.2198	26.3382	36.4158	42.4986	7.84643	10.7525	14.8667	17.35	695±8	745±11	744±15	701±17	0.0240493	1067.52	48.4908	1	1	0	0	0	0		100
10753005	Sod1	Sod1	superoxide dismutase 1, soluble	1499.49	24		1455.21	1516.11	1491.05	1556.67	42.5933	43.1209	32.5093	41.2645	17.3886	17.604	13.2719	16.8462	1455±17	1516±18	1491±13	1557±17	0.00260623	1595.09	59.2738	1	0	1	0	0	1		100
10784980	Sorbs3	Sorbs3	sorbin and SH3 domain containing 3	481.067	24		437.336	502.684	490.712	495.384	13.5251	55.1436	10.8638	11.1231	5.5216	22.5123	4.43511	4.54099	437±6	503±23	491±4	495±5	0.00245554	751.929	40.6967	1	1	1	0	0	0		100
10924824	Sp100	Sp100	SP100 nuclear antigen	162.035	24		118.726	176.08	145.316	145.282	8.58394	40.6146	15.2877	21.7931	3.50438	16.5808	6.24118	8.89699	119±4	176±17	145±6	145±9	0.00733726	553.151	34.9054	1	0	0	0	0	0		100
10924805	Sp140	Sp140	SP140 nuclear body protein	80.6004	24		65.8043	86.3952	75.6781	75.8353	6.15066	17.5409	8.10823	4.50981	2.511	7.16105	3.31017	1.84112	66±3	86±7	76±3	76±2	0.0237045	97.3841	14.6459	1	0	0	0	0	0		100
10899093	Spats2	Spats2	spermatogenesis associated, serine-rich 2	517.301	24		496.031	533.019	535.147	508.657	19.9051	27.6696	30.3272	11.672	8.12622	11.296	12.381	4.76506	496±8	533±11	535±12	509±5	0.0257463	543.334	34.5943	1	1	0	0	0	0		100
10849172	Spg11	Spg11	spastic paraplegia 11 (autosomal recessive)	426.654	24		404.388	434.978	438.696	427.7	18.1822	26.3592	16.6555	15.1384	7.42287	10.7611	6.79959	6.18022	404±7	435±11	439±7	428±6	0.0271197	366.584	28.4156	1	1	0	0	0	0		100
10910976	Spg21	Spg21	spastic paraplegia 21 homolog (human)	346.915	24		312.343	359.661	351.743	344.425	12.4573	24.1715	4.59239	17.3542	5.08567	9.86797	1.87483	7.08482	312±5	360±10	352±2	344±7	0.000367309	248.645	23.4024	1	1	1	0	0	0		100
10720479	Spint2	Spint2	serine peptidase inhibitor, Kunitz type, 2	176.083	24		148.408	207.843	166.611	187.558	9.17096	54.8462	9.83126	32.818	3.74403	22.3909	4.01359	13.3979	148±4	208±22	167±4	188±13	0.0275717	964.28	46.0864	1	0	0	0	0	0		100
10784378	Spryd7	Spryd7	SPRY domain containing 7	969.537	24		932.254	986.796	1005.61	960.584	28.5584	48.6172	19.6963	22.8248	11.6589	19.8479	8.04098	9.31818	932±12	987±20	1006±8	961±9	0.00367963	951.422	45.7781	1	1	0	0	0	0		100
10774782	Sptbn1	Sptbn1	spectrin, beta, non-erythrocytic 1	4491.98	24		4418.19	4526.26	4567.41	4518.92	48.6099	62.8092	68.1856	74.6262	19.8449	25.6417	27.8367	30.466	4418±20	4526±26	4567±28	4519±30	0.00549512	4141.39	95.5089	1	1	1	0	0	0		100
10852636	Sqrdl	Sqrdl	sulfide quinone reductase-like (yeast)	101.02	24		95.5623	103.311	104.303	101.656	6.07906	6.27951	3.62551	4.15579	2.48177	2.5636	1.48011	1.69659	96±2	103±3	104±1	102±2	0.0362528	26.0304	7.57202	1	1	0	0	0	0		100
10898091	Srebf2	Srebf2	sterol regulatory element binding transcription factor 2	1171.92	24		1138.21	1227.43	1228.92	1164.97	35.9421	55.9089	21.9873	65.5618	14.6733	22.8247	8.97628	26.7655	1138±15	1227±23	1229±9	1165±27	0.00797249	2256.39	70.4982	1	1	0	0	0	0		100
10803281	Ss18	Ss18	synovial sarcoma translocation, Chromosome 18	560.173	24		508.122	580.981	569.988	544.165	25.4328	24.1377	25.2607	27.2837	10.3829	9.85416	10.3126	11.1385	508±10	581±10	570±10	544±11	0.000607338	656.694	38.0323	1	1	0	0	0	0		100
10854718	Ssbp1	Ssbp1	single-stranded DNA binding protein 1	634.237	24		611.183	646.208	644.068	623.774	12.9649	27.4689	19.2755	17.9298	5.29288	11.2141	7.86917	7.31983	611±5	646±11	644±8	624±7	0.0195251	385.459	29.138	1	1	0	0	0	0		100
10837175	Ssfa2	Ssfa2	sperm specific antigen 2	313.624	24		283.973	324.002	313.899	318.09	15.6015	26.681	18.6828	17.6888	6.36927	10.8925	7.62721	7.22143	284±6	324±11	314±8	318±7	0.0124081	388.118	29.2383	1	1	1	0	0	0		100
10745424	Ssh2	Ssh2	slingshot homolog 2 (Drosophila)	615.206	24		564.51	603.664	620.942	596.517	19.3074	30.846	30.8803	18.3958	7.88221	12.5928	12.6068	7.51005	565±8	604±13	621±13	597±8	0.00854997	638.409	37.4991	1	1	0	0	0	0		100
10936013	Ssr4	Ssr4	signal sequence receptor, delta	401.758	24		379.161	410.616	406.44	399.097	19.3579	22.7858	8.56751	14.1064	7.90284	9.30226	3.49767	5.75891	379±8	411±9	406±3	399±6	0.0229447	279.599	24.8164	1	1	0	0	0	0		100
10879090	St3gal3	St3gal3	ST3 beta-galactoside alpha-2,3-sialyltransferase 3	597.702	24		579.429	611.281	613.69	603.117	21.7217	20.749	3.68731	20.5236	8.86786	8.47073	1.50534	8.37872	579±9	611±8	614±2	603±8	0.0169344	329.227	26.9289	1	1	0	0	0	0		100
10750672	St3gal6	St3gal6	ST3 beta-galactoside alpha-2,3-sialyltransferase 6	533.139	24		401.168	617.508	493.876	547.668	25.5471	161.603	29.8519	92.9134	10.4296	65.9743	12.187	37.9318	401±10	618±66	494±12	548±38	0.00603638	8176.11	134.197	1	0	1	0	0	0		100
10756289	Stard13	Stard13	StAR-related lipid transfer (START) domain containing 13	191.167	24		178.643	204.21	197.623	187.853	12.4854	17.1611	9.02517	17.2268	5.09713	7.00599	3.68451	7.03279	179±5	204±7	198±4	188±7	0.0368503	202.553	21.1223	1	0	0	0	0	0		100
10802558	Stard6	Stard6	StAR-related lipid transfer (START) domain containing 6	189.855	24		178.121	196.149	194.859	189.159	10.5878	10.5356	11.6671	7.35582	4.32246	4.30113	4.76309	3.003	178±4	196±4	195±5	189±3	0.027628	102.929	15.0571	1	1	0	0	0	0		100
10747506	Stat3	Stat3	signal transducer and activator of transcription 3 (acute-phase response factor)	562.121	24		481.597	570.043	538.322	542.176	17.3838	42.5218	26.7247	39.7338	7.09689	17.3595	10.9103	16.2213	482±7	570±17	538±11	542±16	0.00187236	1063.6	48.4015	1	1	1	0	0	0		100
10927842	Stat4	Stat4	signal transducer and activator of transcription 4	373.3	24		315.417	390.375	374.637	355.646	12.686	38.9297	29.4672	17.0689	5.17904	15.893	12.0299	6.96834	315±5	390±16	375±12	356±7	0.000679774	666.583	38.3176	1	1	1	0	0	0		100
10732676	Stk10	Stk10	serine/threonine kinase 10	221.288	24		192.667	225.243	215.653	211.263	5.77673	27.2691	5.35523	16.2791	2.35834	11.1326	2.18626	6.64592	193±2	225±11	216±2	211±7	0.017278	242.616	23.117	1	0	0	0	0	0		100
10845947	Stk39	Stk39	serine threonine kinase 39	1491.48	24		1346.64	1584.45	1489.64	1589.02	23.9123	250.163	33.6206	151.788	9.76217	102.129	13.7256	61.9673	1347±10	1584±102	1490±14	1589±62	0.0271469	19686	208.233	1	0	1	0	0	0		100
10844666	Stom	Stom	stomatin	190.497	24		161.192	215.405	186.918	180.561	11.64	43.9905	21.0418	34.1499	4.75203	17.9591	8.59027	13.9416	161±5	215±18	187±9	181±14	0.0494231	866.473	43.6866	1	0	0	0	0	0		100
10891445	Ston2	Ston2	stonin 2	698.003	24		654.317	749.61	703.396	691.518	27.2477	82.9014	8.61934	42.1919	11.1238	33.8443	3.51883	17.2248	654±11	750±34	703±4	692±17	0.0241901	2130.26	68.4995	1	0	0	0	0	0		100
10726055	Stx1b	Stx1b	syntaxin 1B	1584.53	24		1534.21	1650.54	1651.95	1589.4	36.9333	90.4595	55.9711	71.6001	15.078	36.9299	22.8501	29.2306	1534±15	1651±37	1652±23	1589±29	0.0175704	4255.2	96.8123	1	1	0	0	0	0		100
10713610	Stx5	Stx5	syntaxin 5	425.033	24		405.914	437.605	432.592	422.631	10.9904	30.7775	7.97228	9.38424	4.48681	12.5649	3.25467	3.8311	406±4	438±13	433±3	423±4	0.0209559	271.109	24.4367	1	1	0	0	0	0		100
10826097	Stxbp3	Stxbp3	syntaxin binding protein 3	872.364	24		800.403	890.466	879.402	878.443	15.8504	86.5002	45.2384	55.0842	6.4709	35.3136	18.4685	22.488	800±6	890±35	879±18	878±22	0.0395871	2978.38	80.9955	1	0	0	0	0	0		100
10757606	Styxl1	Styxl1	serine/threonine/tyrosine interacting-like 1	132.053	24		124.54	141.149	130.475	131.941	8.86173	11.2379	9.06249	3.6266	3.61779	4.58784	3.69975	1.48055	125±4	141±5	130±4	132±1	0.0351	72.3271	12.6218	1	0	0	0	0	0		100
10872836	Syf2	Syf2	SYF2 homolog, RNA splicing factor (S. cerevisiae)	818.797	24		753.293	829.461	859.203	814.678	21.6973	28.6015	22.391	14.5405	8.85789	11.6765	9.14109	5.93615	753±9	829±12	859±9	815±6	9.59007e-07	483.683	32.6401	1	1	1	0	0	-1		100
10885305	Syne2	Syne2	spectrin repeat containing, nuclear envelope 2	219.999	24		194.103	232.156	219.069	222.056	7.45369	36.3125	10.4607	14.4662	3.04296	14.8245	4.27055	5.90579	194±3	232±15	219±4	222±6	0.0239966	376.087	28.7816	1	0	0	0	0	0		100
10864631	Tada3	Tada3	transcriptional adaptor 3	424.116	24		404.16	440.171	439.814	418.459	24.2815	24.3695	17.9741	21.7978	9.91288	9.9488	7.33791	8.89891	404±10	440±10	440±7	418±9	0.0319233	490.237	32.8605	1	1	0	0	0	0		100
10917034	Tagln	Tagln	transgelin	217.942	24		170.594	198.412	217.305	204.105	14.6055	23.0879	21.15	13.9341	5.96265	9.4256	8.63444	5.68857	171±6	198±9	217±9	204±6	0.00250601	337.169	27.2518	1	1	1	0	0	0		100
10831606	Tap1	Tap1	transporter 1, ATP-binding cassette, sub-family B (MDR/TAP)	90.0926	24		79.4358	97.4672	87.9841	86.9504	3.57007	17.1006	6.42077	5.32085	1.45748	6.9813	2.62127	2.17223	79±1	97±7	88±3	87±2	0.0336335	83.2179	13.5388	1	0	0	0	0	0		100
10705971	Tbcb	Tbcb	tubulin folding cofactor B	963.337	24		914.406	978.226	1006.07	968.15	21.1431	58.5919	49.8509	12.5172	8.63163	23.92	20.3515	5.11014	914±9	978±24	1006±20	968±5	0.00575973	1535.59	58.1578	1	1	0	0	0	0		100
10716189	Tcf7l2	Tcf7l2	transcription factor 7-like 2 (T-cell specific, HMG-box)	338.384	24		311.674	360.758	331.027	343.262	10.3902	34.8108	26.5059	22.1095	4.24178	14.2114	10.821	9.02618	312±4	361±14	331±11	343±9	0.0239921	597.048	36.264	1	0	0	0	0	0		100
10847924	Tcp11l1	Tcp11l1	t-complex 11 like 1	1052.82	24		994.523	1084.21	1097.88	1043.53	32.8134	68.4055	9.78108	59.0796	13.396	27.9264	3.99311	24.1191	995±13	1084±28	1098±4	1044±24	0.00576404	2212.17	69.8039	1	1	0	0	0	0		100
10868798	Tdrd7	Tdrd7	tudor domain containing 7	505.293	24		472.903	517.27	520.503	515.498	15.2183	12.2427	11.7531	12.8371	6.21284	4.99804	4.7982	5.24073	473±6	517±5	521±5	515±5	1.09775e-05	172.218	19.4765	1	1	1	0	0	0		100
10853797	Tes	Tes	testis derived transcript	260.222	24		233.963	267.85	258.688	255.736	21.2931	24.1458	11.068	17.591	8.69288	9.8575	4.51851	7.18148	234±9	268±10	259±5	256±7	0.0430735	355.726	27.9916	1	0	0	0	0	0		100
10919637	Tf	Tf	transferrin	4938.73	24		4359.88	5023.81	4943.93	5215.16	125.243	500.464	214.291	561.269	51.1304	204.313	87.4837	229.137	4360±51	5024±204	4944±87	5215±229	0.00782521	151842	578.318	1	1	1	0	0	0		100
10868923	Tgfbr1	Tgfbr1	transforming growth factor, beta receptor 1	534.743	24		460.54	515.98	527.73	501.695	21.0352	28.2909	27.1049	34.3379	8.58759	11.5497	11.0655	14.0184	461±9	516±12	528±11	502±14	0.00342074	788.565	41.6763	1	1	0	0	0	0		100
10920745	Tgfbr2	Tgfbr2	transforming growth factor, beta receptor II	296.051	24		244.811	321.004	272.137	292.785	7.98037	51.3048	14.0643	49.3384	3.25797	20.9451	5.74171	20.1423	245±3	321±21	272±6	293±20	0.014761	1263.56	52.7556	1	0	0	0	0	0		100
10786465	Tkt	Tkt	transketolase	812.051	24		779.797	819.176	835.413	821.207	15.4339	49.2781	13.5834	14.2932	6.30086	20.1177	5.5454	5.83517	780±6	819±20	835±6	821±6	0.00981094	676.229	38.5938	1	1	1	0	0	0		100
10910641	Tle3	Tle3	transducin-like enhancer of split 3 (E(sp1) homolog, Drosophila)	361.29	24		336.956	382.922	358.578	356.685	8.55604	31.3361	9.43704	16.4496	3.49299	12.7929	3.85266	6.71553	337±3	383±13	359±4	357±7	0.00469344	320.635	26.5752	1	0	0	0	0	0		100
10738947	Tlk2	Tlk2	tousled-like kinase 2	573.997	24		559.14	584.745	579.842	564.975	18.2045	13.1059	13.0261	14.1454	7.43197	5.35047	5.31787	5.77482	559±7	585±5	580±5	565±6	0.029194	220.681	22.0472	1	0	0	0	0	0		100
10876337	Tln1	Tln1	talin 1	301.18	24		256.637	311.051	293.258	297.068	12.685	13.178	12.5715	13.4983	5.17862	5.37988	5.13229	5.51065	257±5	311±5	293±5	297±6	8.09944e-06	168.443	19.2618	1	1	1	0	0	0		100
10788238	Tlr3	Tlr3	toll-like receptor 3	240.589	24		160.217	269.954	231.882	259.688	9.18206	49.2649	26.4126	56.8392	3.74856	20.1123	10.7829	23.2045	160±4	270±20	232±11	260±23	0.000629434	1566.91	58.748	1	1	1	0	0	0		100
10869535	Tlr4	Tlr4	toll-like receptor 4	96.1936	24		73.1109	101.174	96.0793	92.4827	4.94674	17.4366	7.14834	13.6715	2.0195	7.11845	2.9183	5.58137	73±2	101±7	96±3	92±6	0.00328884	133.081	17.121	1	1	1	0	0	0		100
10933345	Tlr7	Tlr7	toll-like receptor 7	146.644	24		106.185	142.482	135.873	136.948	5.30988	25.0635	16.0239	10.0265	2.16775	10.2321	6.54174	4.09331	106±2	142±10	136±7	137±4	0.0029012	233.694	22.6879	1	1	1	0	0	0		100
10878202	Tm2d1	Tm2d1	TM2 domain containing 1	578.228	24		553.669	589.54	571.203	600.109	29.2259	15.4231	16.1469	26.3945	11.9314	6.29645	6.59194	10.7755	554±12	590±6	571±7	600±11	0.0128284	526.8	34.0638	1	0	1	0	0	0		100
10928902	Tmbim1	Tmbim1	transmembrane BAX inhibitor motif containing 1	397.345	24		341.542	382.628	401.233	373.535	24.8189	27.4615	22.6858	24.5099	10.1323	11.2111	9.26144	10.0061	342±10	383±11	401±9	374±10	0.00454958	614.386	36.7867	1	1	0	0	0	0		100
10710172	Tmc5	Tmc5	transmembrane channel-like 5	80.961	24		76.4353	84.8471	83.5306	82.1529	4.98974	5.17434	4.58543	3.93919	2.03705	2.11242	1.87199	1.60817	76±2	85±2	84±2	82±2	0.0319719	21.8053	6.93029	1	1	0	0	0	0		100
10886029	Tmed10	Tmed10	transmembrane emp24-like trafficking protein 10 (yeast)	1550.05	24		1442.72	1577.56	1565.28	1549.87	40.1474	53.4975	47.2834	56.2932	16.3901	21.8403	19.3033	22.9816	1443±16	1578±22	1565±19	1550±23	0.00061	2448.96	73.4449	1	1	1	0	0	0		100
10927903	Tmeff2	Tmeff2	transmembrane protein with EGF-like and two follistatin-like domains 2	1176.5	24		1088.35	1203.24	1201.1	1204.9	40.6949	39.2838	34.3347	71.604	16.6136	16.0376	14.0171	29.2322	1088±17	1203±16	1201±14	1205±29	0.00116068	2420.17	73.0119	1	1	1	0	0	0		100
10734866	Tmem107	Tmem107	transmembrane protein 107	118.686	24		110.52	126.908	116.136	123.689	7.86649	13.557	7.37774	9.95087	3.21148	5.53462	3.01195	4.06242	111±3	127±6	116±3	124±4	0.0453229	95.3594	14.4928	1	0	0	0	0	0		100
10723639	Tmem126a	Tmem126a	transmembrane protein 126A	234.514	24		222.189	250.172	247.67	226.403	19.7937	15.1102	17.853	19.5529	8.08074	6.16873	7.28846	7.98242	222±8	250±6	248±7	226±8	0.0358365	335.655	27.1905	1	0	0	0	0	0		100
10855416	Tmem176a	Tmem176a	transmembrane protein 176A	1030.47	24		720.965	1023.75	1011.12	1002.88	24.5487	277.738	111.62	89.108	10.0219	113.386	45.5688	36.3782	721±10	1024±113	1011±46	1003±36	0.00558285	21766.5	218.96	1	1	1	0	0	0		100
10862415	Tmem176b	Tmem176b	transmembrane protein 176B	1876.76	24		1414.24	1905.84	1885.63	1799.66	44.7095	372.909	175.123	163.554	18.2526	152.24	71.4938	66.7708	1414±18	1906±152	1886±71	1800±67	0.00257245	44912.2	314.523	1	1	1	0	0	0		100
10925933	Tmem200c	Tmem200c	transmembrane protein 200C	349.249	24		317.995	360.754	365.76	351.885	10.6819	32.5731	27.2536	24.8438	4.36085	13.2979	11.1262	10.1424	318±4	361±13	366±11	352±10	0.0155339	611.284	36.6938	1	1	0	0	0	0		100
10766253	Tmem63a	Tmem63a	transmembrane protein 63a	313.471	24		261.695	328.745	326.209	320.056	9.60545	24.1849	30.6351	22.3656	3.92141	9.87345	12.5067	9.13074	262±4	329±10	326±13	320±9	0.000174382	526.033	34.039	1	1	1	0	0	0		100
10732534	Tmem8a	Tmem8a	transmembrane protein 8A	284.498	24		274.986	299.348	286.562	283.177	15.2207	9.47357	13.5021	12.0013	6.21383	3.86757	5.51221	4.89952	275±6	299±4	287±6	283±5	0.0411428	165.739	19.1066	1	0	0	0	0	0		100
10918718	Tmod3	Tmod3	tropomodulin 3	470.514	24		425.674	512.641	446.667	453.269	16.2384	77.0418	25.8656	53.1001	6.6293	31.4522	10.5596	21.678	426±7	513±31	447±11	453±22	0.0430193	2237.02	70.195	1	0	0	0	0	0		100
10765092	Tnfsf4	Tnfsf4	tumor necrosis factor (ligand) superfamily, member 4	36.836	4		31.6706	37.8607	35.1275	36.4978	2.76246	4.84831	3.02239	3.32813	1.12777	1.97931	1.23388	1.35871	32±1	38±2	35±1	36±1	0.0440477	12.2756	5.19987	1	0	0	0	0	0		100
10754766	Tnk2	Tnk2	tyrosine kinase, non-receptor, 2	488.916	24		460.197	503.825	504.883	490.431	15.6677	28.5497	15.4965	22.0818	6.39631	11.6554	6.32641	9.01486	460±6	504±12	505±6	490±9	0.00497096	427.709	30.6934	1	1	0	0	0	0		100
10820795	Tnpo1	Tnpo1	transportin 1	713.11	24		665.786	724.271	707.338	722.823	13.404	39.8895	39.4702	35.577	5.47216	16.2848	16.1136	14.5243	666±5	724±16	707±16	723±15	0.0261137	1125.32	49.7862	1	0	1	0	0	0		100
10764837	Tor1aip2	Tor1aip2	torsin A interacting protein 2	442.836	24		414.426	452.608	458.549	433.968	21.1831	21.2679	12.2911	23.1588	8.64796	8.6826	5.01783	9.45454	414±9	453±9	459±5	434±9	0.00501536	394.207	29.4668	1	1	0	0	0	0		100
10758808	Tpcn1	Tpcn1	two pore segment channel 1	445.154	24		420.733	463.698	446.089	440.429	10.771	28.3895	13.1384	19.0711	4.39724	11.59	5.36371	7.78574	421±4	464±12	446±5	440±8	0.0096114	341.345	27.42	1	0	0	0	0	0		100
10724529	Tpp1	Tpp1	tripeptidyl peptidase I	1501.42	24		1367.7	1509.44	1483.56	1507.49	27.9013	61.385	70.1654	122.422	11.3906	25.0603	28.6449	49.9784	1368±11	1509±25	1484±29	1507±50	0.0185606	6237.69	117.215	1	0	1	0	0	0		100
10764573	Tpr	Tpr	translocated promoter region (to activated MET oncogene)	1166.71	24		1125.79	1177.6	1202.37	1144.21	25.327	44.916	39.32	27.3184	10.3397	18.3369	16.0523	11.1527	1126±10	1178±18	1202±16	1144±11	0.00551856	1196.78	51.3427	1	1	0	0	0	-1		100
10928307	Trak2	Trak2	trafficking protein, kinesin binding 2	1962.47	24		1882.84	1996.49	2000.19	1960.5	45.8589	50.6282	54.4745	76.1886	18.7218	20.6689	22.2391	31.1039	1883±19	1996±21	2000±22	1961±31	0.00933325	3401.52	86.5581	1	1	0	0	0	0		100
10926245	Trem2	Trem2	triggering receptor expressed on myeloid cells 2	214.225	24		146.735	190.246	203.019	196.067	12.6593	9.66797	12.5634	15.0178	5.16814	3.94693	5.12898	6.13098	147±5	190±4	203±5	196±6	1.23154e-06	162.738	18.9328	1	1	1	0	0	0		100
10804350	Trim36	Trim36	tripartite motif-containing 36	265.673	24		242.519	277.852	288.518	256.843	26.0636	33.2543	14.8388	12.5181	10.6404	13.576	6.05793	5.11048	243±11	278±14	289±6	257±5	0.0106485	510.759	33.5412	1	1	0	0	0	0		100
10724377	Trim5	Trim5	tripartite motif-containing 5	227.977	24		192.334	251.017	217.075	219.588	21.0416	40.6298	13.5713	19.9962	8.59018	16.587	5.54045	8.16341	192±9	251±17	217±6	220±8	0.00946753	617.736	36.8869	1	0	0	0	0	0		100
10760212	Trrap	Trrap	transformation/transcription domain-associated protein	814.8	24		792.148	857.282	824.658	808.681	25.1082	43.0879	30.0514	39.2489	10.2504	17.5905	12.2684	16.0233	792±10	857±18	825±12	809±16	0.0366678	1199.8	51.4073	1	0	0	0	0	0		100
10805511	Tshz1	Tshz1	teashirt zinc finger homeobox 1	405.429	24		384.138	422.907	416.659	400.438	18.4932	11.4302	26.3285	13.5888	7.54983	4.66636	10.7486	5.54762	384±8	423±5	417±11	400±6	0.0106721	348.517	27.7066	1	1	0	0	0	0		100
10712349	Tspan4	Tspan4	tetraspanin 4	201.529	24		181.68	203.165	205.253	201.388	13.8908	8.05994	13.3614	16.46	5.67089	3.29046	5.45476	6.71975	182±6	203±3	205±5	201±7	0.0260826	182.732	20.0622	1	1	0	0	0	0		100
10895499	Tspan8	Tspan8	tetraspanin 8	39.4889	8		31.8865	44.5595	37.9384	38.6874	2.54818	5.95245	6.97659	5.61253	1.04029	2.43008	2.84818	2.29131	32±1	45±2	38±3	39±2	0.0111766	30.2663	8.16489	1	0	0	0	0	0		100
10825418	Ttf2	Ttf2	transcription termination factor, RNA polymerase II	109.875	24		105.757	114.595	107.552	108.447	3.0274	4.70907	5.77402	5.80472	1.23593	1.92247	2.35723	2.36977	106±1	115±2	108±2	108±2	0.0490122	24.7209	7.3791	1	0	0	0	0	0		100
10924392	Ttll4	Ttll4	tubulin tyrosine ligase-like family, member 4	293.028	24		279.779	311.596	293.783	293.752	14.7967	18.0182	9.37459	11.2544	6.04072	7.35589	3.82716	4.5946	280±6	312±7	294±4	294±5	0.00971216	182.424	20.0453	1	0	0	0	0	0		100
10877005	Txn1	Txn1	thioredoxin 1	1515.61	24		1446.23	1575.92	1506.42	1487.11	53.3259	75.568	41.1443	77.7787	21.7702	30.8505	16.7971	31.753	1446±22	1576±31	1506±17	1487±32	0.0237814	3988.01	93.7236	1	0	0	0	0	0		100
10705874	Tyrobp	Tyrobp	Tyro protein tyrosine kinase binding protein	259.496	24		152.935	265.843	249.804	228.218	14.4797	83.6414	39.8638	23.4644	5.91131	34.1465	16.2743	9.57928	153±6	266±34	250±16	228±10	0.00252917	2091.07	67.8665	1	1	1	0	0	0		100
10837128	Ube2e3	Ube2e3	ubiquitin-conjugating enzyme E2E 3	567.844	24		532.838	583.305	594.099	564.965	20.6266	27.2045	14.5541	18.1573	8.42079	11.1062	5.94167	7.4127	533±8	583±11	594±6	565±7	0.000296326	410.272	30.0612	1	1	1	0	0	0		100
10886494	Ubr7	Ubr7	ubiquitin protein ligase E3 component n-recognin 7 (putative)	373.523	24		344.349	368.701	379.927	365.689	10.6565	22.762	8.02755	18.4738	4.35049	9.29255	3.27723	7.54191	344±4	369±9	380±3	366±8	0.00753148	245.729	23.2648	1	1	0	0	0	0		100
10925158	Ugt1a5	Ugt1a5	UDP glucuronosyltransferase 1 family, polypeptide A5	182.609	24		155.813	186.09	168.349	185.38	7.07206	17.3375	11.1564	23.3719	2.88716	7.07802	4.55457	9.54153	156±3	186±7	168±5	185±10	0.011425	252.946	23.604	1	0	1	0	0	0		100
10712720	Unc93b1	Unc93b1	unc-93 homolog B1 (C. elegans)	152.546	24		113.793	156.42	147.113	139.112	7.1465	41.8238	13.4731	15.4315	2.91755	17.0745	5.50035	6.29989	114±3	156±17	147±6	139±6	0.0257113	492.134	32.924	1	1	0	0	0	0		100
10893849	Uqcr11	Uqcr11	ubiquinol-cytochrome c reductase, complex III subunit XI	2776.45	24		2685.8	2879.72	2891.73	2763.85	69.4099	135.02	91.7414	112.529	28.3365	55.1217	37.4533	45.9399	2686±28	2880±55	2892±37	2764±46	0.0081903	10653	153.182	1	1	0	0	0	0		100
10742601	Uqcrq	Uqcrq	ubiquinol-cytochrome c reductase, complex III subunit VII	871.987	24		850.104	891.694	892.726	875.776	39.729	12.4716	18.9387	9.57081	16.2193	5.09152	7.73171	3.90727	850±16	892±5	893±8	876±4	0.021728	566.605	35.3274	1	1	0	0	0	0		100
10826517	Usp53	Usp53	ubiquitin specific peptidase 53	544.157	24		490.514	540.17	533.591	541.093	20.2703	28.3631	35.5017	16.3228	8.27532	11.5792	14.4935	6.66377	491±8	540±12	534±14	541±7	0.00976826	679.281	38.6808	1	1	1	0	0	0		100
10716803	Utrn	Utrn	utrophin	367.624	24		336.448	388.367	369.519	360.096	35.0305	23.1635	33.82	14.8322	14.3011	9.45646	13.807	6.05521	336±14	388±9	370±14	360±6	0.0446982	794.78	41.8402	1	0	0	0	0	0		100
10881885	Vamp3	Vamp3	vesicle-associated membrane protein 3	613.234	24		565.339	613.808	632.377	612.129	21.6042	18.0368	26.9874	36.3442	8.81989	7.36348	11.0176	14.8375	565±9	614±7	632±11	612±15	0.00290575	730.586	40.115	1	1	1	0	0	0		100
10863215	Vamp5	Vamp5	vesicle-associated membrane protein 5	143.762	24		120.421	152.483	141.54	143.948	5.78319	12.4587	7.75412	5.51837	2.36098	5.08624	3.16561	2.25287	120±2	152±5	142±3	144±2	1.84435e-05	65.3156	11.9944	1	1	1	0	0	0		100
10863218	Vamp8	Vamp8	vesicle-associated membrane protein 8	77.0147	24		65.9763	89.0829	74.2305	78.3851	6.1022	19.9285	5.85178	10.8315	2.49121	8.13577	2.38898	4.42196	66±2	89±8	74±2	78±4	0.028045	133.294	17.1347	1	0	0	0	0	0		100
10831267	Vars	Vars	valyl-tRNA synthetase	200.963	24		191.169	211.512	207.112	196.419	9.8483	16.7119	8.36048	10.0048	4.02055	6.8226	3.41315	4.08446	191±4	212±7	207±3	196±4	0.0266884	129.056	16.8601	1	0	0	0	0	0		100
10726080	Vkorc1	Vkorc1	vitamin K epoxide reductase complex, subunit 1	546.416	24		504.223	567.784	548.047	545.845	22.1653	31.2762	21.7042	18.3282	9.04895	12.7685	8.86071	7.48246	504±9	568±13	548±9	546±7	0.00178477	547.594	34.7296	1	1	1	0	0	0		100
10894401	Vom2r57	Vom2r57	vomeronasal 2 receptor, 57	52.7624	24		48.0921	57.6699	53.0719	54.5066	4.17186	4.77175	5.32249	5.5831	1.70315	1.94806	2.1729	2.27929	48±2	58±2	53±2	55±2	0.0340398	25.0316	7.42531	1	0	0	0	0	0		100
10881353	Vps13d	Vps13d	vacuolar protein sorting 13 homolog D (S. cerevisiae)	852.888	24		825.389	882.644	877.422	830.547	24.8272	52.7186	23.8942	36.2788	10.1357	21.5223	9.75475	14.8108	825±10	883±22	877±10	831±15	0.0198607	1243.92	52.3439	1	0	0	0	0	0		100
10807609	Vps4a	Vps4a	vacuolar protein sorting 4 homolog A (S. cerevisiae)	894.709	24		867.838	913.146	911.471	884.665	20.0834	19.7005	7.37741	26.3044	8.19903	8.04269	3.01181	10.7387	868±8	913±8	911±3	885±11	0.00203467	384.257	29.0925	1	1	0	0	0	0		100
10766970	Vps4b	Vps4b	vacuolar protein sorting 4 homolog B (S. cerevisiae)	473.234	24		452.054	488.491	470.189	475.32	12.9905	16.8739	14.3132	16.7147	5.30335	6.88874	5.84335	6.82373	452±5	488±7	470±6	475±7	0.00703509	231.785	22.5951	1	0	1	0	0	0		100
10880331	Wasf2	Wasf2	WAS protein family, member 2	364.944	24		322.666	369.833	366.462	356.637	12.0231	25.5048	14.1117	24.9179	4.90842	10.4123	5.76107	10.1727	323±5	370±10	366±6	357±10	0.00245758	390.788	29.3387	1	1	1	0	0	0		100
10780966	Wdfy2	Wdfy2	WD repeat and FYVE domain containing 2	264.887	24		247.987	284.226	266.109	260.058	14.6965	27.4748	17.4603	8.2248	5.99981	11.2165	7.12815	3.35776	248±6	284±11	266±7	260±3	0.0243718	313.786	26.2898	1	0	0	0	0	0		100
10771287	Wdfy3	Wdfy3	WD repeat and FYVE domain containing 3	1735.45	24		1676.3	1810.05	1755.89	1733.38	38.7455	78.9312	50.8419	70.956	15.8178	32.2235	20.7561	28.9676	1676±16	1810±32	1756±21	1733±29	0.0145329	3711.83	90.4201	1	0	0	0	0	0		100
10846201	Wipf1	Wipf1	WAS/WASL interacting protein family, member 1	278.472	24		249.522	281.477	289.985	271.698	8.60411	8.99867	19.9614	11.54	3.51261	3.67369	8.14921	4.71119	250±4	281±4	290±8	272±5	0.000318239	176.432	19.7133	1	1	1	0	0	0		100
10819975	Wls	Wls	wntless homolog (Drosophila)	645.976	24		555.276	704.67	622.194	685.145	14.9832	102.815	18.3116	81.9579	6.11686	41.9738	7.47567	33.4592	555±6	705±42	622±7	685±33	0.00381492	4140.41	95.4976	1	0	1	0	0	0		100
10865129	Wnk1	Wnk1	WNK lysine deficient protein kinase 1	2614.71	24		2449.39	2651.35	2616.02	2679.75	42.3973	34.5469	125.898	66.6702	17.3086	14.1037	51.3975	27.218	2449±17	2651±14	2616±51	2680±27	0.000291396	6065.11	115.582	1	1	1	0	0	0		100
10794360	Wnk2	Wnk2	WNK lysine deficient protein kinase 2	459.259	24		449.392	490.075	460.489	469.268	15.0494	34.8095	17.9922	11.167	6.14389	14.2109	7.34527	4.55891	449±6	490±14	460±7	469±5	0.0299768	432.701	30.872	1	0	0	0	0	0		100
10742048	Wwc1	Wwc1	WW and C2 domain containing 1	425.752	24		411.186	449.363	431.287	425.879	16.1317	23.8867	14.6819	25.0106	6.58575	9.75169	5.99385	10.2105	411±7	449±10	431±6	426±10	0.042554	409.942	30.0491	1	0	0	0	0	0		100
10924177	Xrcc5	Xrcc5	X-ray repair complementing defective repair in Chinese hamster cells 5	464.378	24		431.793	475.851	470.474	467.86	7.62136	22.3521	20.8987	25.5452	3.11141	9.12521	8.53184	10.4288	432±3	476±9	470±9	468±10	0.00559395	407.129	29.9459	1	1	1	0	0	0		100
10906465	Yaf2	Yaf2	YY1 associated factor 2	1073.32	24		1043.32	1101.47	1109.98	1065.82	13.7183	32.7524	28.8979	30.2598	5.60048	13.3711	11.7975	12.3535	1043±6	1101±13	1110±12	1066±12	0.00146659	736.081	40.2655	1	1	0	0	0	-1		100
10755501	Yeats2	Yeats2	YEATS domain containing 2	349.696	24		339.401	366.677	348.41	347.613	7.45132	9.66449	20.0771	10.8274	3.04199	3.94551	8.19643	4.42026	339±3	367±4	348±8	348±4	0.0208586	171.201	19.4189	1	0	0	0	0	0		100
10769180	Zbtb37	Zbtb37	zinc finger and BTB domain containing 37	171.23	24		161.097	179.803	176.574	169.481	7.55911	14.8256	9.16178	9.0226	3.08599	6.05254	3.74028	3.68346	161±3	180±6	177±4	169±4	0.0291052	104.822	15.1949	1	1	0	0	0	0		100
10735015	Zbtb4	Zbtb4	zinc finger and BTB domain containing 4	675.594	24		642.055	704.143	699.712	682.729	13.6951	51.7616	18.9223	34.9166	5.59099	21.1316	7.72498	14.2546	642±6	704±21	700±8	683±14	0.0150575	1028.47	47.5955	1	1	0	0	0	0		100
10897970	Zc3h7b	Zc3h7b	zinc finger CCCH-type containing 7B	840.945	24		800.384	883.297	860.443	838.794	25.3485	48.4552	43.9374	40.2398	10.3485	19.7818	17.9374	16.4278	800±10	883±20	860±18	839±16	0.016891	1597.53	59.3192	1	1	0	0	0	0		100
10861976	Zc3hav1	Zc3hav1	zinc finger CCCH type, antiviral 1	247.358	24		208.425	253.661	251.451	249.103	8.89893	34.8348	18.4429	13.3583	3.63297	14.2213	7.5293	5.4535	208±4	254±14	251±8	249±5	0.00300872	412.776	30.1528	1	1	1	0	0	0		100
10861968	Zc3hav1l	Zc3hav1l	zinc finger CCCH-type, antiviral 1-like	226.993	24		188.844	230.474	236.641	231.756	20.5466	46.9226	14.0064	12.8727	8.38811	19.1561	5.7181	5.25526	189±8	230±19	237±6	232±5	0.0166423	669.85	38.4114	1	1	1	0	0	0		100
10814259	Zfand1	Zfand1	zinc finger, AN1-type domain 1	354.234	24		339.664	361.487	370.519	349.921	14.2082	14.0219	8.65997	13.054	5.80049	5.72443	3.53542	5.32929	340±6	361±6	371±4	350±5	0.00275173	159.097	18.7198	1	1	0	0	0	-1		100
10817646	Zfp364	Zfp364	zinc finger protein 364	661.692	24		628.971	678.27	693.845	645.066	34.2074	26.9472	27.8703	17.251	13.9651	11.0012	11.378	7.04268	629±14	678±11	694±11	645±7	0.00229381	743.531	40.4688	1	1	0	0	0	-1		100
10888150	Zfp36l2	Zfp36l2	zinc finger protein 36, C3H type-like 2	741.745	24		642.678	759.213	746.487	744.085	80.0168	63.2823	44.5336	68.8736	32.6667	25.8349	18.1808	28.1175	643±33	759±26	746±18	744±28	0.0235994	4298.22	97.3005	1	1	1	0	0	0		100
10802294	Zfp532	Zfp532	zinc finger protein 532	739.772	24		696.658	760.685	771.268	731.709	30.1266	38.7496	32.3254	32.0677	12.2991	15.8195	13.1968	13.0916	697±12	761±16	771±13	732±13	0.00484477	1100.56	49.2353	1	1	0	0	0	0		100
10786139	Zmiz1	Zmiz1	zinc finger, MIZ-type containing 1	1073.87	24		1027.28	1123.1	1072.9	1066.35	27.8683	75.5709	44.1338	28.9982	11.3772	30.8517	18.0175	11.8385	1027±11	1123±31	1073±18	1066±12	0.0246268	2140.55	68.6647	1	0	0	0	0	0		100
10774438	Zrsr1	Zrsr1	zinc finger (CCCH type), RNA binding motif and serine/arginine rich 1	707.988	24		684.825	729.479	734.756	695.473	27.4063	24.8014	21.2815	30.2447	11.1886	10.1251	8.68815	12.3474	685±11	729±10	735±9	695±12	0.00887208	687.064	38.9018	1	1	0	0	0	-1		100
10833265	Zufsp	Zufsp	zinc finger with UFM1-specific peptidase domain	148.941	24		136.627	156.005	156.952	142.405	9.68509	12.9304	11.3168	7.34058	3.95392	5.27881	4.62006	2.99678	137±4	156±5	157±5	142±3	0.00709562	107.766	15.4068	1	1	0	0	0	0		100

## Sheet: Aging down, Unchanged by FK
ID	Gene	Gene	Description	Supermean	#P	stable aging	Yng	Vect	Short	Long	Yng	Vect	Short	Long	Yng	Vect	Short	Long	Young	Aging Ctrl	Short FK	Long FK	ANOVA	MSE	LSD	Y v Age Ctrl	Y v Short	Y v Long	Age Ctrl v Short FK	Age Ctrl v Long FK	Short v Long	Combo	Pattern#
10761526	Aacs	Aacs	acetoacetyl-CoA synthetase	323.994	24		346.8	307.28	322.3	329.007	16.6778	12.8002	12.5328	21.4231	6.80869	5.22568	5.11649	8.74596	347±7	307±5	322±5	329±9	0.00682747	269.802	24.3777	-1	-1	0	0	0	0		-100
10739818	Aanat	Aanat	aralkylamine N-acetyltransferase	197.387	24		210.141	189.78	186.859	203.664	10.6799	12.0695	6.64879	13.5584	4.36005	4.92737	2.71436	5.53521	210±4	190±5	187±3	204±6	0.00482705	120.694	16.3047	-1	-1	0	0	0	1		-100
10774179	Abca13	Abca13	ATP-binding cassette, subfamily A (ABC1), member 13	66.8418	24		72.6061	61.0319	66.7961	67.3	5.57964	7.00516	3.83957	5.50998	2.27788	2.85984	1.5675	2.24944	73±2	61±3	67±2	67±2	0.0225947	30.3927	8.18193	-1	0	0	0	0	0		-100
10806960	Abce1	Abce1	ATP-binding cassette, subfamily E (OABP), member 1	1167.75	24		1222	1146.17	1156.49	1130.64	36.5128	48.8706	31.5814	54.6506	14.9063	19.9514	12.8931	22.311	1222±15	1146±20	1156±13	1131±22	0.00973966	1902.09	64.7271	-1	-1	-1	0	0	0		-100
10810662	Acd	Acd	adrenocortical dysplasia homolog (mouse)	489.008	24		536.576	469.869	483.314	472.867	29.9521	34.2258	34.3602	23.5945	12.2279	13.9726	14.0275	9.63242	537±12	470±14	483±14	473±10	0.00458226	939.89	45.4998	-1	-1	-1	0	0	0		-100
10876707	Acnat2	Acnat2	acyl-coenzyme A amino acid N-acyltransferase 2	80.2899	24		86.5344	76.6725	76.2708	81.0178	6.16777	4.51641	6.67122	5.60649	2.51798	1.84382	2.72352	2.28884	87±3	77±2	76±3	81±2	0.0254354	34.2889	8.69055	-1	-1	0	0	0	0		-100
10812438	Acot12	Acot12	acyl-CoA thioesterase 12	76.2327	24		84.2756	69.7941	74.6598	78.4087	7.48357	7.0176	8.28155	3.57084	3.05516	2.86492	3.38093	1.45779	84±3	70±3	75±3	78±1	0.0156557	46.5095	10.1214	-1	0	0	0	0	0		-100
10848315	Actc1	Actc1	actin, alpha, cardiac muscle 1	96.1401	24		108.422	89.4898	90.4387	96.3416	6.21045	10.221	8.27039	9.71246	2.53541	4.17271	3.37637	3.9651	108±3	89±4	90±3	96±4	0.00519217	74.9674	12.8501	-1	-1	0	0	0	0		-100
10765090	Actg1	Actg1	actin, gamma 1	9171.36	24		9571.39	8971.78	9120.56	8993.41	194.957	276.112	211.155	195.402	79.5907	112.722	86.2038	79.7726	9571±80	8972±113	9121±86	8993±80	0.000475459	47833.4	324.591	-1	-1	-1	0	0	0		-100
10863549	Actg2	Actg2	actin, gamma 2, smooth muscle, enteric	71.6217	24		78.5056	67.1952	67.0765	73.4144	6.90656	6.9479	6.12518	6.09407	2.81959	2.83647	2.50059	2.48789	79±3	67±3	67±3	73±2	0.0205369	42.3618	9.65957	-1	-1	0	0	0	0		-100
10869185	Actl7a	Actl7a	actin-like 7a	45.6442	22		49.4838	42.904	42.8731	47.3047	3.6237	3.15996	2.57354	5.98216	1.47937	1.29005	1.05064	2.44221	49±1	43±1	43±1	47±2	0.0284598	16.7181	6.06826	-1	-1	0	0	0	0		-100
10876855	Actl7b	Actl7b	actin-like 7b	119.113	24		136.248	106.955	111.218	123.404	12.7461	16.6073	11.6269	21.4646	5.20358	6.77991	4.74666	8.76289	136±5	107±7	111±5	123±9	0.0264363	257.637	23.8218	-1	-1	0	0	0	0		-100
10851513	Ada	Ada	adenosine deaminase	109.14	24		117.242	101.787	105.256	110.107	3.1046	8.36006	8.35528	6.57984	1.26745	3.41298	3.41103	2.68621	117±1	102±3	105±3	110±3	0.00748653	47.0147	10.1763	-1	-1	0	0	0	0		-100
10765298	Adcy10	Adcy10	adenylate cyclase 10 (soluble)	81.6229	24		91.5422	76.1932	76.9346	81.5663	12.7128	9.33169	6.6884	7.54316	5.18998	3.80965	2.73053	3.07948	92±5	76±4	77±3	82±3	0.0424452	87.6089	13.8914	-1	-1	0	0	0	0		-100
10839596	Adra2b	Adra2b	adrenergic, alpha-2B-, receptor	70.0284	24		75.8933	65.3232	66.3392	72.8482	9.66247	4.66049	2.83402	4.05332	3.94468	1.90264	1.15698	1.65476	76±4	65±2	66±1	73±2	0.0199723	35.5791	8.85254	-1	-1	0	0	0	0		-100
10804721	Afap1l1	Afap1l1	actin filament associated protein 1-like 1	230.89	24		243.966	225.279	218.826	232.411	12.5157	7.34855	7.73045	15.9012	5.10952	3.00003	3.15594	6.49164	244±5	225±3	219±3	232±6	0.00931642	134.856	17.2348	-1	-1	0	0	0	0		-100
10924769	Agfg1	Agfg1	ArfGAP with FG repeats 1	1193.8	24		1231.46	1164.59	1165.78	1199.72	39.3222	21.997	33.4779	48.9215	16.0532	8.98025	13.6673	19.9721	1231±16	1165±9	1166±14	1200±20	0.0213473	1433.53	56.192	-1	-1	0	0	0	0		-100
10718001	Agpat4	Agpat4	1-acylglycerol-3-phosphate O-acyltransferase 4 (lysophosphatidic acid acyltransferase, delta)	1208.75	24		1257.43	1184.47	1244.61	1160.25	21.898	29.5966	56.5408	55.2616	8.93983	12.0827	23.0827	22.5605	1257±9	1184±12	1245±23	1160±23	0.00309644	1955.52	65.63	-1	0	-1	0	0	-1		-100
10925478	Agxt	Agxt	alanine-glyoxylate aminotransferase	66.4365	24		72.6994	63.6452	64.1719	66.122	3.45516	1.86937	8.11757	5.67769	1.41056	0.763169	3.31399	2.31791	73±1	64±1	64±3	66±2	0.0390656	29.7013	8.08833	-1	-1	0	0	0	0		-100
10894582	Aldh1l2	Aldh1l2	aldehyde dehydrogenase 1 family, member L2	75.9122	24		83.2918	69.0658	70.9831	76.1747	2.80746	6.47041	5.06077	9.61608	1.14614	2.64153	2.06605	3.92575	83±1	69±3	71±2	76±4	0.00679592	41.9619	9.61387	-1	-1	0	0	0	0		-100
10876671	Alg2	Alg2	asparagine-linked glycosylation 2, alpha-1,3-mannosyltransferase homolog (S. cerevisiae)	522.949	24		564.966	497.486	527.841	514.093	23.1242	33.9025	36.7251	22.4158	9.44043	13.8406	14.993	9.1512	565±9	497±14	528±15	514±9	0.00756859	869.851	43.7717	-1	0	-1	0	0	0		-100
10752137	Alg3	Alg3	asparagine-linked glycosylation 3, alpha-1,3- mannosyltransferase homolog (S. cerevisiae)	856.963	24		941.441	839.898	841.459	822.918	27.9359	29.6602	81.726	23.5353	11.4048	12.1087	33.3645	9.60823	941±11	840±12	841±33	823±10	0.00159286	2294.01	71.0834	-1	-1	-1	0	0	0		-100
10744410	Alox12e	Alox12e	arachidonate 12-lipoxygenase, epidermal	73.8812	24		82.1023	67.8154	71.7942	74.5752	6.23079	9.71887	10.2789	5.26787	2.54371	3.96771	4.19635	2.1506	82±3	68±4	72±4	75±2	0.0495794	65.2091	11.9846	-1	0	0	0	0	0		-100
10838069	Alx4	Alx4	ALX homeobox 4	231.107	24		253.162	213.938	219.793	237.361	31.5191	23.8032	9.39373	23.3318	12.8676	9.71761	3.83497	9.52515	253±13	214±10	220±4	237±10	0.0434919	547.195	34.717	-1	0	0	0	0	0		-100
10901910	Amdhd1	Amdhd1	amidohydrolase domain containing 1	79.0291	24		86.3999	75.6683	76.559	76.6313	5.86304	4.09871	6.66542	9.47046	2.39358	1.67329	2.72115	3.8663	86±2	76±2	77±3	77±4	0.0486626	47.8769	10.2691	-1	0	0	0	0	0		-100
10899554	Amhr2	Amhr2	anti-Mullerian hormone receptor, type II	52.004	24		57.042	47.4771	49.4332	53.6953	5.83689	2.98743	4.14428	4.84599	2.3829	1.21961	1.69189	1.97837	57±2	47±1	49±2	54±2	0.0116681	21.5442	6.88867	-1	-1	0	0	0	0		-100
10917152	Ankk1	Ankk1	ankyrin repeat and kinase domain containing 1	72.1512	24		81.3067	68.4975	66.6317	70.9475	6.56965	8.43198	6.95804	4.13438	2.68205	3.44234	2.84061	1.68785	81±3	68±3	67±3	71±2	0.00537116	43.5648	9.79578	-1	-1	-1	0	0	0		-100
10884264	Ankmy2	Ankmy2	ankyrin repeat and MYND domain containing 2	890.622	24		931.227	862.949	904.497	874.59	29.8268	27.6761	31.1231	45.7408	12.1767	11.2987	12.706	18.6736	931±12	863±11	904±13	875±19	0.0156818	1200.86	51.4301	-1	0	-1	0	0	0		-100
10927361	Ankrd23	Ankrd23	ankyrin repeat domain 23	110.26	24		121.01	104.874	103.278	111.834	7.04958	7.7314	4.86007	7.80729	2.87798	3.15633	1.98411	3.18731	121±3	105±3	103±2	112±3	0.00122332	47.9185	10.2736	-1	-1	0	0	0	0		-100
10787275	Ankrd41	Ankrd41	ankyrin repeat domain 41	76.1678	24		84.7913	70.1723	75.3232	75.8388	6.6043	2.73416	11.034	7.32193	2.69619	1.11622	4.50463	2.98917	85±3	70±1	75±5	76±3	0.035679	59.1995	11.419	-1	0	0	0	0	0		-100
10771592	Ankrd56	Ankrd56	ankyrin repeat domain 56	103.554	24		112.236	94.594	100.029	109.04	7.02203	9.78069	12.1564	10.0785	2.86673	3.99295	4.96283	4.11452	112±3	95±4	100±5	109±4	0.0301176	98.7349	14.7471	-1	0	0	0	0	0		-100
10925574	Ano7	Ano7	anoctamin 7	111.638	24		123.378	104.397	104.532	114.886	9.84497	12.1921	5.95431	7.1128	4.01919	4.97742	2.43084	2.90379	123±4	104±5	105±2	115±3	0.00441986	79.4442	13.2282	-1	-1	0	0	0	0		-100
10923524	Aox3l1	Aox3l1	aldehyde oxidase 3-like 1	67.6238	24		72.9715	62.6269	66.0138	68.7566	2.78283	6.35958	7.23038	5.98022	1.13608	2.59629	2.95179	2.44141	73±1	63±3	66±3	69±2	0.048861	33.7213	8.61833	-1	0	0	0	0	0		-100
10826691	Ap1ar	Ap1ar	adaptor-related protein complex 1 associated regulatory protein	1533.48	24		1606.61	1494.9	1563.55	1517.56	43.0388	96.9262	36.4037	35.933	17.5705	39.57	14.8618	14.6696	1607±18	1495±40	1564±15	1518±15	0.0162836	3153.82	83.3468	-1	0	-1	0	0	0		-100
10736816	Ap2b1	Ap2b1	adaptor-related protein complex 2, beta 1 subunit	2270.62	24		2372.88	2261.46	2294.25	2200.89	51.2908	91.9744	32.6504	68.3577	20.9394	37.5484	13.3295	27.9069	2373±21	2261±38	2294±13	2201±28	0.00145059	3983.42	93.6697	-1	0	-1	0	0	0		-100
10909727	Apoa5	Apoa5	apolipoprotein A-V	99.3325	24		108.514	95.2819	91.5662	100.155	8.16473	13.8864	7.19791	3.3842	3.33324	5.66912	2.93853	1.38159	109±3	95±6	92±3	100±1	0.0187242	74.7874	12.8347	-1	-1	0	0	0	0		-100
10897723	Apobec3b	Apobec3b	apolipoprotein B mRNA editing enzyme, catalytic polypeptide-like 3B	50.084	21		54.8994	41.62	44.822	53.2176	5.73854	7.54433	5.51816	11.6303	2.34275	3.07996	2.25278	4.74806	55±2	42±3	45±2	53±5	0.03283	64.2575	11.8969	-1	0	0	0	0	0		-100
10899145	Aqp2	Aqp2	aquaporin 2 (collecting duct)	72.0085	24		79.8538	64.1893	72.5566	70.6266	6.21982	7.09233	7.79832	8.21219	2.53923	2.89543	3.18365	3.35261	80±3	64±3	73±3	71±3	0.0193113	54.5213	10.9586	-1	0	0	0	0	0		-100
10885560	Arg2	Arg2	arginase type II	159.776	24	Down	170.898	149.872	162.104	159.966	8.33298	16.309	10.9322	9.37745	3.40193	6.65811	4.46306	3.82833	171±3	150±7	162±4	160±4	0.0487168	128.862	16.8474	-1	0	0	0	0	0		-100
10837960	Arhgap1	Arhgap1	Rho GTPase activating protein 1	891.623	24		940.639	883.561	870.589	866.968	45.514	32.1085	33.0728	31.0883	18.581	13.1082	13.5019	12.6917	941±19	884±13	871±14	867±13	0.00753423	1304.36	53.6006	-1	-1	-1	0	0	0		-100
10841752	Arhgap40	Arhgap40	Rho GTPase activating protein 40	131.959	24		140.001	125.354	125.42	137.201	6.81605	13.5991	10.0937	6.74444	2.78264	5.55182	4.12074	2.75341	140±3	125±6	125±4	137±3	0.0273651	89.9415	14.0751	-1	-1	0	0	0	0		-100
10876178	Arid3c	Arid3c	AT rich interactive domain 3C (BRIGHT-like)	42.5966	15		48.8278	39.7817	41.7439	40.9642	5.54083	3.8356	1.85197	8.41001	2.26204	1.56588	0.756064	3.43337	49±2	40±2	42±1	41±3	0.0490524	30.6917	8.22207	-1	0	0	0	0	0		-100
10922492	Arid5a	Arid5a	AT rich interactive domain 5A (Mrf1 like)	251.307	24		273.243	239.565	225.876	262.956	11.8946	17.4175	15.1479	23.4345	4.85596	7.11067	6.1841	9.56711	273±5	240±7	226±6	263±10	0.00064078	306.004	25.9618	-1	-1	0	0	0	1		-100
10746819	Arl5c	Arl5c	ADP-ribosylation factor-like 5C	77.6277	24		83.5173	71.7199	75.5574	77.3453	4.72242	5.63968	6.87461	7.07699	1.92792	2.30239	2.80655	2.88917	84±2	72±2	76±3	77±3	0.034309	38.1816	9.1706	-1	0	0	0	0	0		-100
10919502	Armc8	Armc8	armadillo repeat containing 8	743.581	24		775.413	727.136	752.959	725.742	25.061	38.7908	33.5106	22.6109	10.2311	15.8363	13.6806	9.23087	775±10	727±16	753±14	726±9	0.0340003	912.117	44.8225	-1	0	-1	0	0	0		-100
10722720	Arrdc4	Arrdc4	arrestin domain containing 4	192.254	24		205.314	179.445	193.321	188.023	8.44999	10.6386	9.65455	14.1374	3.44969	4.34319	3.94146	5.77159	205±3	179±4	193±4	188±6	0.00711051	119.743	16.2404	-1	0	-1	0	0	0		-100
10901531	Ascl1	Ascl1	achaete-scute complex homolog 1 (Drosophila)	217.925	24		245.535	195.877	223.463	210.724	25.8524	24.3591	35.9327	22.2346	10.5542	9.94458	14.6695	9.07723	246±11	196±10	223±15	211±9	0.046563	770.677	41.2009	-1	0	0	0	0	0		-100
10797669	Aspn	Aspn	asporin	264.501	24		286.935	241.739	254.336	268.06	29.4937	17.31	19.8932	9.45585	12.0408	7.06678	8.12136	3.86033	287±12	242±7	254±8	268±4	0.0101082	419.668	30.4035	-1	-1	0	0	0	0		-100
10729732	Atad1	Atad1	ATPase family, AAA domain containing 1	694.986	24		721.978	678.881	686.723	696.786	21.6143	18.5916	16.5748	18.2461	8.824	7.58999	6.76664	7.44892	722±9	679±8	687±7	697±7	0.00613999	355.616	27.9873	-1	-1	0	0	0	0		-100
10893590	Atcay	Atcay	ataxia, cerebellar, Cayman type	955.512	24		998.246	928.716	977.112	945.997	20.5743	56.8548	37.2489	16.9014	8.39944	23.2109	15.2068	6.89995	998±8	929±23	977±15	946±7	0.0165096	1232.21	52.0971	-1	0	-1	0	0	0		-100
10846233	Atf2	Atf2	activating transcription factor 2	2552.36	24		2626.37	2506.46	2609.72	2509.3	44.8545	46.1385	85.202	88.6493	18.3118	18.836	34.7836	36.1909	2626±18	2506±19	2610±35	2509±36	0.0125029	4956.06	104.481	-1	0	-1	0	0	0		-100
10929086	Atg9a	Atg9a	autophagy related 9A	1121.74	24		1182.02	1088.65	1116.47	1126.49	26.8788	66.7301	36.0978	27.3774	10.9732	27.2424	14.7369	11.1768	1182±11	1089±27	1116±15	1126±11	0.00869672	1667.73	60.6085	-1	-1	0	0	0	0		-100
10887952	Atl2	Atl2	atlastin GTPase 2	821.967	24		857.845	782.555	835.17	811.476	51.7901	36.4426	40.9225	25.9914	21.1432	14.8776	16.7066	10.6109	858±21	783±15	835±17	811±11	0.0336989	1603.92	59.4376	-1	0	0	0	0	0		-100
10855969	Atoh1	Atoh1	atonal homolog 1 (Drosophila)	59.7535	24		71.5506	51.7656	54.3343	61.8835	5.79757	7.17743	6.99972	10.567	2.36685	2.93017	2.85762	4.31394	72±2	52±3	54±3	62±4	0.00192233	61.9687	11.6831	-1	-1	0	0	0	0		-100
10829896	Atoh7	Atoh7	atonal homolog 7 (Drosophila)	80.8207	24		89.9498	72.2993	78.4788	81.2459	6.27846	6.99322	7.52774	3.0305	2.56317	2.85497	3.07319	1.23719	90±3	72±3	78±3	81±1	0.00129847	37.9984	9.14857	-1	-1	0	0	0	0		-100
10769476	Atp1b1	Atp1b1	ATPase, Na+/K+ transporting, beta 1 polypeptide	6455.89	24		6606.31	6389.69	6500.47	6500.23	79.6518	86.1449	73.9353	71.9704	32.5177	35.1685	30.184	29.3818	6606±33	6390±35	6500±30	6500±29	0.00217842	6033.51	115.281	-1	0	0	0	0	0		-100
10735578	Atp2a3	Atp2a3	ATPase, Ca++ transporting, ubiquitous	81.6016	24		84.9208	75.6584	78.9474	80.7492	3.03805	8.06177	5.47175	2.54955	1.24028	3.29121	2.23383	1.04085	85±1	76±3	79±2	81±1	0.0460781	25.701	7.52395	-1	0	0	0	0	0		-100
10796198	Atp5c1	Atp5c1	ATP synthase, H+ transporting, mitochondrial F1 complex, gamma polypeptide 1	1665.28	24		1694.08	1638.31	1677.18	1663.51	28.3323	27.6119	30.4481	34.003	11.5666	11.2725	12.4304	13.8817	1694±12	1638±11	1677±12	1664±14	0.0433938	919.984	45.0154	-1	0	0	0	0	0		-100
10861923	Atp6v0a4	Atp6v0a4	ATPase, H+ transporting, lysosomal V0 subunit A4	119.255	24		130.721	111.275	115.214	121.966	4.333	11.8311	6.30518	8.32992	1.76894	4.83001	2.57408	3.40068	131±2	111±5	115±3	122±3	0.00328648	63.1308	11.7921	-1	-1	0	0	0	0		-100
10823609	Atp6v1a	Atp6v1a	ATPase, H+ transporting, lysosomal V1 subunit A	2889.74	24		3037.67	2868.14	2893.67	2811.67	65.1519	141.646	84.3209	75.6139	26.5981	57.8267	34.4238	30.8693	3038±27	2868±58	2894±34	2812±31	0.00370858	8716.61	138.562	-1	-1	-1	0	0	0		-100
10810553	B3gnt9	B3gnt9	UDP-GlcNAc:betaGal beta-1,3-N-acetylglucosaminyltransferase 9	85.8373	24		91.5186	82.0769	85.4951	83.946	6.10604	5.57203	3.77045	2.14801	2.49278	2.27477	1.53928	0.876923	92±2	82±2	85±2	84±1	0.0153431	21.3031	6.85003	-1	0	-1	0	0	0		-100
10895830	B4galnt1	B4galnt1	beta-1,4-N-acetyl-galactosaminyl transferase 1	530.38	24		557.244	524.76	542.174	521.952	17.5671	32.7373	17.0477	11.3266	7.17175	13.365	6.9597	4.62408	557±7	525±13	542±7	522±5	0.027878	417.081	30.3096	-1	0	-1	0	0	0		-100
10865165	B4galnt3	B4galnt3	beta-1,4-N-acetyl-galactosaminyl transferase 3	75.8057	24		85.135	70.1677	71.2193	76.8825	5.39674	3.79308	8.55406	6.57138	2.20321	1.54852	3.49218	2.68276	85±2	70±2	71±3	77±3	0.00315287	41.3131	9.53926	-1	-1	0	0	0	0		-100
10765542	B4galt3	B4galt3	UDP-Gal:betaGlcNAc beta 1,4-galactosyltransferase, polypeptide 3	953.541	24		1046.85	887.872	942.754	946.814	44.2427	100.834	30.3923	32.4087	18.062	41.1652	12.4076	13.2308	1047±18	888±41	943±12	947±13	0.00137904	3175.1	83.6276	-1	-1	-1	0	0	0		-100
10713201	Batf2	Batf2	basic leucine zipper transcription factor, ATF-like 2	241.122	24		269.266	222.776	225.982	246.426	16.7718	33.956	11.9334	27.2686	6.84707	13.8625	4.87181	11.1324	269±7	223±14	226±5	246±11	0.0115632	549.917	34.8032	-1	-1	0	0	0	0		-100
10719593	Bcl3	Bcl3	B-cell CLL/lymphoma 3	163.585	24		174.983	155.754	150.842	166.441	9.72996	10.2464	7.92418	11.5857	3.97224	4.18308	3.23503	4.72984	175±4	156±4	151±3	166±5	0.00234591	98.8643	14.7567	-1	-1	0	0	0	1		-100
10711161	Bcl7c	Bcl7c	B-cell CLL/lymphoma 7C	279.741	24		314.724	252.578	257.804	293.965	16.4471	53.6009	34.59	35.7593	6.71452	21.8825	14.1213	14.5987	315±7	253±22	258±14	294±15	0.0275493	1327.41	54.0721	-1	-1	0	0	0	0		-100
10808223	Bcmo1	Bcmo1	beta-carotene 15,15'-monooxygenase 1	94.593	24		103.013	88.8363	91.0969	95.1971	6.34757	8.69719	7.89273	6.54107	2.59138	3.55061	3.22219	2.67038	103±3	89±4	91±3	95±3	0.0211931	54.1803	10.9242	-1	-1	0	0	0	0		-100
10852411	Bhlhe23	Bhlhe23	basic helix-loop-helix family, member e23	57.5519	24		62.1331	54.5363	53.2795	60.3401	4.82136	2.13104	4.08435	6.61056	1.96831	0.869991	1.66743	2.69875	62±2	55±1	53±2	60±3	0.0123454	22.9631	7.11191	-1	-1	0	0	0	0		-100
10851336	Blcap	Blcap	bladder cancer associated protein homolog (human)	717.02	24		795.899	680.563	702.945	714.392	27.196	62.9543	62.0626	53.5303	11.1027	25.701	25.337	21.8536	796±11	681±26	703±25	714±22	0.00861752	2796.7	78.4863	-1	-1	-1	0	0	0		-100
10713042	Bles03	Bles03	basophilic leukemia expressed protein BLES03	600.344	24		654.317	580.611	589.91	589.176	41.8781	27.3476	53.1017	45.0691	17.0966	11.1646	21.6787	18.3994	654±17	581±11	590±22	589±18	0.0328269	1895.55	64.6158	-1	0	-1	0	0	0		-100
10879547	Bmp8a	Bmp8a	bone morphogenetic protein 8a	93.6155	24		105.645	85.3496	87.9821	96.1313	9.00138	6.71773	10.5313	9.08101	3.6748	2.7425	4.29938	3.70731	106±4	85±3	88±4	96±4	0.00528444	81.7105	13.4156	-1	-1	0	0	0	0		-100
10834360	Bmyc	Bmyc	brain expressed myelocytomatosis oncogene	631.154	24		670.341	625.758	643.232	614.196	35.5928	39.0414	20.6054	17.8586	14.5307	15.9386	8.41214	7.29074	670±15	626±16	643±8	614±7	0.020327	849.934	43.2677	-1	0	-1	0	0	0		-100
10925636	Bok	Bok	BCL2-related ovarian killer	468.307	24		505.148	449.34	486.633	455.902	26.1281	55.1794	24.3905	29.5382	10.6667	22.5269	9.95738	12.0589	505±11	449±23	487±10	456±12	0.0449412	1206.81	51.5574	-1	0	0	0	0	0		-100
10854437	Bpgm	Bpgm	2,3-bisphosphoglycerate mutase	844.863	24		870.504	816.776	847.837	846.345	19.0211	33.5991	15.1019	31.4825	7.76532	13.7168	6.16532	12.8527	871±8	817±14	848±6	846±13	0.0225969	653.72	37.9461	-1	0	0	0	0	0		-100
10759834	Brca2	Brca2	breast cancer 2	302.132	24		315.017	288.348	297.897	307.26	15.9666	12.7353	8.22672	15.4551	6.51836	5.19914	3.35855	6.30952	315±7	288±5	298±3	307±6	0.0222746	181.901	20.0165	-1	0	0	0	0	0		-100
10884671	Brms1l	Brms1l	breast cancer metastasis-suppressor 1-like	859.284	24		892.328	831.572	886.166	831.391	38.9451	37.7595	46.7603	31.9528	15.8993	15.4153	19.0898	13.0447	892±16	832±15	886±19	831±13	0.0200366	1543.38	58.3052	-1	0	-1	0	0	0		-100
10748853	Btbd17	Btbd17	BTB (POZ) domain containing 17	184.924	24		198.511	179.377	181.132	188.695	8.88308	12.5167	10.7238	6.59043	3.6265	5.10991	4.37797	2.69053	199±4	179±5	181±4	189±3	0.0142819	95.4411	14.499	-1	-1	0	0	0	0		-100
10923560	Bzw1	Bzw1	basic leucine zipper and W2 domains 1	1190.79	24		1263.41	1138.08	1172.23	1139.28	60.3538	68.2096	64.2483	96.9912	24.6393	27.8465	26.2293	39.5965	1263±25	1138±28	1172±26	1139±40	0.0301949	5499.94	110.065	-1	0	-1	0	0	0		-100
10712776	Cabp2	Cabp2	calcium binding protein 2	158.011	24		178.073	145.594	148.794	159.516	11.311	22.9392	12.8113	13.7906	4.61772	9.36488	5.23019	5.62999	178±5	146±9	149±5	160±6	0.00866327	237.688	22.881	-1	-1	0	0	0	0		-100
10858218	Cacna2d4	Cacna2d4	calcium channel, voltage-dependent, alpha 2/delta subunit 4	96.8245	24		103.599	91.0232	92.7723	100.097	6.27992	7.86096	5.35638	8.1078	2.56377	3.20922	2.18673	3.31	104±3	91±3	93±2	100±3	0.0198021	48.2369	10.3077	-1	-1	0	0	0	0		-100
10770810	Camk1g	Camk1g	calcium/calmodulin-dependent protein kinase IG	416.273	24		491.796	386.157	414.521	400.468	73.5235	66.603	45.5634	31.7566	30.0158	27.1905	18.6012	12.9646	492±30	386±27	415±19	400±13	0.0218607	3168.15	83.536	-1	0	-1	0	0	0		-100
10882996	Capn13	Capn13	calpain 13	90.7442	24		96.8366	85.9689	86.401	95.2041	4.81612	8.89854	5.27861	6.05821	1.96617	3.63282	2.15498	2.47326	97±2	86±4	86±2	95±2	0.0127574	39.7653	9.35885	-1	-1	0	0	0	0		-100
10808812	Capn9	Capn9	calpain 9	97.1959	24		107.121	88.2812	92.0165	99.7676	7.15103	9.86644	9.32118	6.20679	2.91939	4.02796	3.80535	2.53391	107±3	88±4	92±4	100±3	0.00498723	66.9534	12.1439	-1	-1	0	0	0	0		-100
10873366	Capzb	Capzb	capping protein (actin filament) muscle Z-line, beta	3179.09	24		3332.39	3046.61	3156.75	3131.04	66.6321	129.118	66.109	106.249	27.2024	52.7121	26.9889	43.3762	3332±27	3047±53	3157±27	3131±43	0.000550795	8799.03	139.216	-1	-1	-1	0	0	0		-100
10905335	Card10	Card10	caspase recruitment domain family, member 10	88.7476	24		97.8675	85.866	82.4798	89.1964	7.30792	8.5402	5.96836	4.93909	2.98345	3.48652	2.43657	2.01638	98±3	86±3	82±2	89±2	0.00576931	45.2026	9.9782	-1	-1	0	0	0	0		-100
10819030	Casp6	Casp6	caspase 6	181.377	24		201.694	167.46	171.39	186.509	13.6072	18.7106	13.9465	9.43109	5.55514	7.63859	5.69364	3.85023	202±6	167±8	171±6	187±4	0.00220694	197.021	20.8318	-1	-1	0	0	0	0		-100
10754371	Casr	Casr	calcium-sensing receptor	70.6434	24		82.237	64.3578	65.221	70.9522	9.22142	8.35914	3.93702	5.19949	3.76463	3.4126	1.60728	2.12268	82±4	64±3	65±2	71±2	0.00109438	48.2814	10.3124	-1	-1	-1	0	0	0		-100
10842525	Cass4	Cass4	Cas scaffolding protein family member 4	135.379	24		155.558	122.34	134.583	130.268	11.9796	19.074	13.0358	13.8984	4.89063	7.78691	5.32183	5.67399	156±5	122±8	135±5	130±6	0.00706896	209.91	21.5024	-1	0	-1	0	0	0		-100
10931123	Cbx2	Cbx2	chromobox homolog 2	172.15	24		193.296	161.673	152.901	177.864	16.39	19.7219	17.6354	9.47887	6.69121	8.05141	7.19962	3.86973	193±7	162±8	153±7	178±4	0.0018925	258.066	23.8416	-1	-1	0	0	0	1		-100
10733241	Cby3	Cby3	chibby homolog 3 (Drosophila)	98.1507	24		107.973	89.4267	97.8075	97.6031	4.51675	12.0053	2.67802	2.58365	1.84395	4.90113	1.0933	1.05477	108±2	89±5	98±1	98±1	0.00111296	39.355	9.31046	-1	-1	-1	0	0	0		-100
10805967	Ccdc102a	Ccdc102a	coiled-coil domain containing 102A	132.979	24		142.107	129.01	122.683	136.028	5.12166	6.51299	7.84998	5.76446	2.09091	2.65892	3.20474	2.35333	142±2	129±3	123±3	136±2	0.000294427	40.7942	9.47916	-1	-1	0	0	0	1		-100
10826779	Ccdc109b	Ccdc109b	coiled-coil domain containing 109B	53.685	24		57.6218	48.2594	50.4648	57.0676	5.0404	5.48764	6.59042	7.40405	2.05773	2.24032	2.69053	3.02269	58±2	48±2	50±3	57±3	0.0476986	38.8817	9.2543	-1	0	0	0	0	0		-100
10909463	Ccdc153	Ccdc153	coiled-coil domain containing 153	270.873	24		302.253	258.542	259.718	268.542	18.1423	31.8727	21.082	11.4332	7.40655	13.012	8.60668	4.6676	302±7	259±13	260±9	269±5	0.00722498	451.844	31.5475	-1	-1	-1	0	0	0		-100
10771598	Ccdc158	Ccdc158	coiled-coil domain containing 158	75.6945	24		81.7435	69.5647	74.6496	76.5667	6.99414	6.2198	6.94583	2.78193	2.85535	2.53922	2.83562	1.13572	82±3	70±3	75±3	77±1	0.0252099	35.7501	8.8738	-1	0	0	0	0	0		-100
10917841	Ccdc33	Ccdc33	coiled-coil domain containing 33	92.5718	24		101.532	88.6329	84.6105	97.3885	3.75429	5.82582	8.35506	5.60513	1.53268	2.37838	3.41094	2.28828	102±2	89±2	85±3	97±2	0.000477921	37.4925	9.08747	-1	-1	0	0	0	1		-100
10727854	Ccdc85b	Ccdc85b	coiled-coil domain containing 85B	559.929	24		597.404	533.591	560.647	557.353	17.6748	46.4694	44.9962	22.2917	7.21572	18.9711	18.3696	9.10054	597±7	534±19	561±18	557±9	0.0453536	1200.4	51.4201	-1	0	0	0	0	0		-100
10867848	Ccnc	Ccnc	cyclin C	688.894	24		715.983	677.166	676.848	690.883	10.3639	15.7527	12.4975	27.5446	4.23105	6.43102	5.1021	11.245	716±4	677±6	677±5	691±11	0.00429211	321.27	26.6015	-1	-1	0	0	0	0		-100
10813087	Ccno	Ccno	cyclin O	50.533	24		55.1287	48.2223	49.0555	48.2862	4.91558	4.09912	5.11152	3.82933	2.00678	1.67346	2.08677	1.56332	55±2	48±2	49±2	48±2	0.0488902	20.6307	6.74105	-1	0	-1	0	0	0		-100
10719692	Cd177	Cd177	CD177 molecule	98.0116	24		106.303	89.4319	95.0946	99.1618	7.73886	9.8591	5.34688	8.1344	3.15938	4.02496	2.18286	3.32086	106±3	89±4	95±2	99±3	0.0142347	61.1603	11.6066	-1	0	0	0	0	0		-100
10756154	Cd209e	Cd209e	CD209e molecule	41.7466	11		48.5182	37.7399	41.7912	39.5851	9.12766	2.76764	3.92177	4.36033	3.72635	1.12988	1.60106	1.7801	49±4	38±1	42±2	40±2	0.0251963	32.5881	8.47228	-1	0	-1	0	0	0		-100
10728766	Cd5	Cd5	Cd5 molecule	141.465	24		153.087	134.83	134.811	145.168	8.4403	6.59123	13.8974	14.1262	3.44574	2.69086	5.6736	5.76698	153±3	135±3	135±6	145±6	0.0368814	131.232	17.0016	-1	-1	0	0	0	0		-100
10705065	Cd79a	Cd79a	Cd79a molecule, immunoglobulin-associated alpha	86.8057	24		94.8798	84.524	81.6714	88.8946	8.53137	4.25434	8.19816	5.5241	3.48292	1.73683	3.34689	2.25521	95±3	85±2	82±3	89±2	0.0227292	48.6814	10.3551	-1	-1	0	0	0	0		-100
10879704	Cdca8	Cdca8	cell division cycle associated 8	92.7374	24		103.192	86.6956	86.3402	92.7053	11.1824	9.03579	5.23823	7.39156	4.5652	3.68885	2.1385	3.01759	103±5	87±4	86±2	93±3	0.00983158	71.6939	12.5664	-1	-1	0	0	0	0		-100
10805746	Cdh11	Cdh11	cadherin 11	1046.59	24		1113.91	1037.34	1063.1	1017.36	15.5779	45.7364	43.1575	26.7191	6.35966	18.6718	17.619	10.908	1114±6	1037±19	1063±18	1017±11	0.000760031	1182.26	51.0303	-1	0	-1	0	0	0		-100
10867667	Cdh17	Cdh17	cadherin 17	58.207	24		64.5063	52.9414	55.3942	58.8514	2.78513	9.44959	4.23103	3.07547	1.13702	3.85778	1.72731	1.25556	65±1	53±4	55±2	59±1	0.00953134	28.0402	7.8589	-1	-1	0	0	0	0		-100
10805767	Cdh8	Cdh8	cadherin 8	1257.43	24		1371.26	1185.41	1273.25	1258.1	62.1552	145.222	43.0151	48.4729	25.3748	59.2866	17.5609	19.789	1371±25	1185±59	1273±18	1258±20	0.0104918	6561.76	120.221	-1	0	0	0	0	0		-100
10710985	Cdipt	Cdipt	CDP-diacylglycerol--inositol 3-phosphatidyltransferase	1754	24		1863.27	1729.68	1768.83	1712.42	87.3813	117.965	40.608	56.7272	35.6733	48.1591	16.5781	23.1588	1863±36	1730±48	1769±17	1712±23	0.0178453	6219.77	117.046	-1	0	-1	0	0	0		-100
10840085	Cds2	Cds2	CDP-diacylglycerol synthase (phosphatidate cytidylyltransferase) 2	2406.75	24		2491.95	2377.79	2419.01	2403.12	53.2105	95.5197	42.4487	57.3801	21.7231	38.9957	17.3296	23.4253	2492±22	2378±39	2419±17	2403±23	0.0382665	4006.56	93.9413	-1	0	0	0	0	0		-100
10907315	Cela1	Cela1	chymotrypsin-like elastase family, member 1	97.9916	24		109.404	91.2455	94.7976	97.339	6.42578	9.50397	11.9653	11.0091	2.62331	3.87998	4.88481	4.49445	109±3	91±4	95±5	97±4	0.0333169	99.4525	14.8006	-1	0	0	0	0	0		-100
10796234	Celf2	Celf2	CUGBP, Elav-like family member 2	2771.83	24		2893.87	2705.18	2792.03	2738.47	62.9947	158.719	77.6182	120.892	25.7175	64.7969	31.6875	49.3539	2894±26	2705±65	2792±32	2738±49	0.0431079	11779.3	161.076	-1	0	0	0	0	0		-100
10844100	Cercam	Cercam	cerebral endothelial cell adhesion molecule	261.778	24		280.788	251.904	251.49	262.315	15.5181	15.4384	12.835	4.36235	6.33523	6.30272	5.23987	1.78092	281±6	252±6	251±5	262±2	0.00270115	161.909	18.8845	-1	-1	0	0	0	0		-100
10806221	Ces1d	Ces1d	carboxylesterase 1D	68.6297	24		77.7115	61.0014	62.1729	73.6637	8.92286	7.71213	7.63121	13.9539	3.64274	3.14846	3.11543	5.69667	78±4	61±3	62±3	74±6	0.0240208	100.039	14.8441	-1	-1	0	0	0	0		-100
10803136	Cetn1	Cetn1	centrin, EF-hand protein, 1	40.6308	13		43.9751	37.7662	38.9478	41.5805	1.572	4.62485	1.77747	2.8172	0.641767	1.88809	0.725649	1.15012	44±1	38±2	39±1	42±1	0.00745431	8.0733	4.21693	-1	-1	0	0	0	0		-100
10750391	Chaf1b	Chaf1b	chromatin assembly factor 1, subunit B (p60)	205.478	24		220.727	191.822	193.542	211.589	14.4805	15.4038	14.7372	7.98934	5.91165	6.28857	6.01643	3.26163	221±6	192±6	194±6	212±3	0.00369959	179.084	19.8609	-1	-1	0	0	0	0		-100
10939002	Chmp1b	Chmp1b	charged multivesicular body protein 1B	676.557	24		730.649	641.306	684.029	662.687	41.9773	36.6349	20.7004	44.944	17.1372	14.9562	8.45092	18.3483	731±17	641±15	684±8	663±18	0.00495426	1390.59	55.3441	-1	0	-1	0	0	0		-100
10846220	Chn1	Chn1	chimerin (chimaerin) 1	7222.47	24		7657.76	6897.18	7314.49	7127.15	163.62	641.115	147.103	152.168	66.7975	261.734	60.0543	62.1225	7658±67	6897±262	7314±60	7127±62	0.00696451	105366	481.748	-1	0	-1	0	0	0		-100
10710639	Chp2	Chp2	calcineurin B homologous protein 2	50.2307	24		54.114	47.6282	47.2153	52.9753	3.11113	4.16997	4.03339	5.37427	1.27011	1.70238	1.64662	2.19404	54±1	48±2	47±2	53±2	0.0216795	18.0897	6.31229	-1	-1	0	0	0	0		-100
10744472	Chrne	Chrne	cholinergic receptor, nicotinic, epsilon	56.2021	24		61.2732	53.6514	50.6974	59.1922	3.79444	3.01846	3.99309	6.6183	1.54907	1.23228	1.63017	2.70191	61±2	54±1	51±2	59±3	0.00313178	21.4298	6.87037	-1	-1	0	0	0	1		-100
10927603	Chst10	Chst10	carbohydrate sulfotransferase 10	471.963	24		510.165	436.086	475.359	470.184	31.1143	49.6217	37.4893	23.1041	12.7024	20.258	15.3049	9.43222	510±13	436±20	475±15	470±9	0.0244629	1283.47	53.1697	-1	0	0	0	0	0		-100
10864018	Chst13	Chst13	carbohydrate (chondroitin 4) sulfotransferase 13	140.871	24		157.062	130.18	133.772	143.407	20.3719	17.699	12.0449	12.907	8.3168	7.2256	4.91731	5.26928	157±8	130±7	134±5	143±5	0.0465025	257.182	23.8008	-1	0	0	0	0	0		-100
10741463	Chtf18	Chtf18	CTF18, chromosome transmission fidelity factor 18 homolog (S. cerevisiae)	115.702	24		123.152	109.658	114.268	116.689	5.85388	5.32518	5.78227	6.59399	2.38984	2.174	2.3606	2.69199	123±2	110±2	114±2	117±3	0.0101275	35.2288	8.80886	-1	-1	0	0	0	0		-100
10740442	Ciita	Ciita	class II, major histocompatibility complex, transactivator	116.645	24		126.107	112.739	110.831	117.763	6.84541	6.50241	8.41973	5.33903	2.79463	2.6546	3.43734	2.17965	126±3	113±3	111±3	118±2	0.00557713	47.3899	10.2168	-1	-1	0	0	0	0		-100
10787689	Cilp2	Cilp2	cartilage intermediate layer protein 2	131.586	24		141.008	124.315	128.293	133.205	6.74675	8.9836	8.58422	10.4113	2.75435	3.66754	3.50449	4.25039	141±3	124±4	128±4	133±4	0.0276869	76.8858	13.0135	-1	0	0	0	0	0		-100
10719442	Ckm	Ckm	creatine kinase, muscle	239.745	24		253.646	227.39	229.671	247.94	22.4368	7.38861	11.113	18.2326	9.15978	3.01639	4.53687	7.44341	254±9	227±3	230±5	248±7	0.0298495	263.949	24.1119	-1	0	0	0	0	0		-100
10881063	Clcnka	Clcnka	chloride channel Ka	142.883	24		156.944	135.511	134.912	147.784	13.5761	10.5013	11.9003	14.1068	5.54243	4.28715	4.85826	5.75909	157±6	136±4	135±5	148±6	0.0225826	161.356	18.8523	-1	-1	0	0	0	0		-100
10881084	Clcnkb	Clcnkb	chloride channel Kb	124.139	24		136.174	113.585	122.003	125.913	8.39826	12.9292	7.68529	10.1665	3.42857	5.27833	3.13751	4.15045	136±3	114±5	122±3	126±4	0.00975968	96.4956	14.5789	-1	0	0	0	0	0		-100
10863573	Clec4f	Clec4f	C-type lectin domain family 4, member F	49.6228	23		54.2604	45.2663	48.0088	50.5943	4.75136	6.39148	4.76656	2.81019	1.93973	2.60931	1.94594	1.14725	54±2	45±3	48±2	51±1	0.0322054	22.5983	7.05519	-1	0	0	0	0	0		-100
10719824	Cnfn	Cnfn	cornifelin	57.5376	24		65.5789	53.1364	57.2718	55.4455	8.23916	3.13705	7.47856	5.74331	3.36362	1.28069	3.05311	2.34469	66±3	53±1	57±3	55±2	0.0253877	43.3345	9.76984	-1	0	-1	0	0	0		-100
10880472	Cnksr1	Cnksr1	connector enhancer of kinase suppressor of Ras 1	117.364	24		125.479	111.197	110.539	122.606	10.6485	9.10065	11.2517	5.9318	4.34722	3.71533	4.59347	2.42165	125±4	111±4	111±5	123±2	0.0271488	89.8509	14.068	-1	-1	0	0	0	0		-100
10861778	Cnot4	Cnot4	CCR4-NOT transcription complex, subunit 4	1456.96	24		1510.9	1403.12	1472.48	1452.4	37.1028	59.8793	54.8295	49.2588	15.1472	24.4456	22.3841	20.1098	1511±15	1403±24	1472±22	1452±20	0.0177586	2546.77	74.8973	-1	0	0	0	0	0		-100
10788414	Cnot7	Cnot7	CCR4-NOT transcription complex, subunit 7	1680.42	24		1726.15	1640.13	1717.6	1649.15	62.305	66.0097	53.3009	24.3248	25.4359	26.9484	21.76	9.93054	1726±25	1640±27	1718±22	1649±10	0.0225362	2842.22	79.1224	-1	0	0	0	0	0		-100
10743895	Cntrob	Cntrob	centrobin, centrosomal BRCA2 interacting protein	163.508	24		178.041	157.259	149.51	169.543	8.68153	14.2483	12.7041	9.29158	3.54422	5.81686	5.18641	3.79327	178±4	157±6	150±5	170±4	0.00171348	127.765	16.7756	-1	-1	0	0	0	1		-100
10818502	Col11a1	Col11a1	collagen, type XI, alpha 1	160.363	24		175.888	158.694	150.357	154.965	7.47395	8.17101	5.05177	6.64946	3.05123	3.3358	2.06238	2.71463	176±3	159±3	150±2	155±3	2.13735e-05	47.1073	10.1863	-1	-1	-1	0	0	0		-100
10833104	Col13a1	Col13a1	collagen, type XIII, alpha 1	158.179	24		168.804	148.603	150.416	164.246	9.49188	11.8316	8.0964	16.7918	3.87504	4.83022	3.30534	6.85524	169±4	149±5	150±3	164±7	0.0238709	144.632	17.8486	-1	-1	0	0	0	0		-100
10896558	Col14a1	Col14a1	collagen, type XIV, alpha 1	77.6238	24		82.315	74.7842	78.4809	77.4512	3.54337	5.00107	3.18804	4.52987	1.44658	2.04168	1.30151	1.84931	82±1	75±2	78±1	77±2	0.0442788	16.644	6.0548	-1	0	0	0	0	0		-100
10730691	Col17a1	Col17a1	collagen, type XVII, alpha 1	118.621	24		126.091	111.644	113.684	123.851	7.71412	9.69271	8.76086	10.0324	3.14928	3.95703	3.57661	4.09571	126±3	112±4	114±4	124±4	0.0331229	82.1233	13.4494	-1	0	0	0	0	0		-100
10733339	Col23a1	Col23a1	collagen, type XXIII, alpha 1	215.126	24		226.641	205.529	209.594	220.368	8.25583	14.7465	14.5178	3.67384	3.37043	6.02024	5.92688	1.49984	227±3	206±6	210±6	220±1	0.0176324	122.735	16.442	-1	-1	0	0	0	0		-100
10869412	Col27a1	Col27a1	collagen, type XXVII, alpha 1	470.21	24		507.467	453.941	443.089	484.054	20.0336	36.5296	22.5292	28.2146	8.17868	14.9132	9.19752	11.5186	507±8	454±15	443±9	484±12	0.00252321	729.607	40.0881	-1	-1	0	0	0	1		-100
10906746	Col2a1	Col2a1	collagen, type II, alpha 1	220.439	24		233.241	214.162	215.193	222.012	6.72654	10.3679	14.801	5.28632	2.7461	4.23267	6.04248	2.15813	233±3	214±4	215±6	222±2	0.015409	99.5408	14.8071	-1	-1	0	0	0	0		-100
10924719	Col4a3	Col4a3	collagen, type IV, alpha 3	150.804	24		158.655	144.247	141.648	157.206	5.19164	12.4879	8.36837	9.33831	2.11948	5.09816	3.41637	3.81235	159±2	144±5	142±3	157±4	0.00700598	81.3012	13.3819	-1	-1	0	0	0	1		-100
10913354	Col7a1	Col7a1	procollagen, type VII, alpha 1	198.505	24		218.4	185.059	187.909	204.465	5.39708	19.5527	16.6525	11.0145	2.20335	7.98237	6.79835	4.49664	218±2	185±8	188±7	204±4	0.00209157	193.053	20.6209	-1	-1	0	0	0	0		-100
10765683	Copa	Copa	coatomer protein complex subunit alpha	1523.13	24		1567.53	1486.96	1519.4	1508.55	39.3198	53.4583	29.7529	22.0135	16.0522	21.8243	12.1466	8.98698	1568±16	1487±22	1519±12	1509±9	0.0118469	1368.98	54.9122	-1	0	-1	0	0	0		-100
10772490	Corin	Corin	corin, serine peptidase	99.5489	24		107.491	94.708	95.2449	101.007	5.94154	2.2303	5.63416	5.23415	2.42562	0.910518	2.30014	2.13683	107±2	95±1	95±2	101±2	0.00123258	25.9004	7.55307	-1	-1	0	0	0	0		-100
10854327	Cpa1	Cpa1	carboxypeptidase A1 (pancreatic)	66.3404	24		73.6306	65.8029	61.6786	65.2497	5.12559	3.71595	4.72093	3.55251	2.09251	1.51703	1.92731	1.45031	74±2	66±2	62±2	65±1	0.00119623	19.0068	6.47031	-1	-1	-1	0	0	0		-100
10857718	Cpne9	Cpne9	copine family member IX	185.892	24		201.18	177.905	184.609	182.893	8.80614	9.8606	13.5647	11.4865	3.59509	4.02557	5.53775	4.68935	201±4	178±4	185±6	183±5	0.0126344	124.019	16.5278	-1	-1	-1	0	0	0		-100
10773435	Cpz	Cpz	carboxypeptidase Z	113.759	24		123.355	109.498	105.276	114.416	6.97507	7.51224	13.2894	6.79284	2.84756	3.06686	5.42537	2.77316	123±3	109±3	105±5	114±3	0.0179538	83.3024	13.5456	-1	-1	0	0	0	0		-100
10824600	Creb3l4	Creb3l4	cAMP responsive element binding protein 3-like 4	195.202	24		216.746	189.134	173.509	200.567	18.1072	13.1774	18.5125	15.4958	7.39225	5.37967	7.55771	6.32614	217±7	189±5	174±8	201±6	0.00202102	276.216	24.6658	-1	-1	0	0	0	1		-100
10745042	Cryba1	Cryba1	crystallin, beta A1	104.197	24		116.675	100.324	95.2549	106.828	7.3955	7.93298	12.3528	4.81886	3.0192	3.23862	5.04299	1.96729	117±3	100±3	95±5	107±2	0.00257885	73.9082	12.759	-1	-1	0	0	0	0		-100
10842384	Cse1l	Cse1l	CSE1 chromosome segregation 1-like (yeast)	1279.09	24		1332.83	1224.63	1293.45	1255.38	76.8857	58.7578	34.7304	42.7609	31.3884	23.9878	14.1786	17.4571	1333±31	1225±24	1293±14	1255±17	0.0234562	3081.08	82.38	-1	0	0	0	0	0		-100
10802114	Csnk1a1	Csnk1a1	casein kinase 1, alpha 1	2672.77	24		2780.93	2596.64	2637.74	2663.18	66.4668	96.9223	60.2579	64.5013	27.135	39.5684	24.6002	26.3325	2781±27	2597±40	2638±25	2663±26	0.00251728	5190.63	106.925	-1	-1	-1	0	0	0		-100
10793693	Ctsll3	Ctsll3	cathepsin L-like 3	52.6793	23		59.1585	48.6632	49.0753	55.3936	7.16743	4.56502	6.57045	5.42593	2.92609	1.86366	2.68237	2.21512	59±3	49±2	49±3	55±2	0.0225446	37.0145	9.02936	-1	-1	0	0	0	0		-100
10776547	Cwh43	Cwh43	cell wall biogenesis 43 C-terminal homolog (S. cerevisiae)	105.937	24		116.345	101.044	101.551	107.375	8.12	13.245	8.69392	7.82656	3.31498	5.40724	3.54928	3.19518	116±3	101±5	102±4	107±3	0.0447984	90.2941	14.1026	-1	-1	0	0	0	0		-100
10809269	Cx3cl1	Cx3cl1	chemokine (C-X3-C motif) ligand 1	2625.43	24		2885.38	2448.69	2719.48	2542.58	150.518	342.953	115.84	48.4277	61.4487	140.01	47.2915	19.7705	2885±61	2449±140	2719±47	2543±20	0.00456416	34871.9	277.146	-1	0	-1	0	0	0		-100
10807632	Cyb5b	Cyb5b	cytochrome b5 type B (outer mitochondrial membrane)	779.295	24		824.225	741.066	781.937	786.286	35.1638	39.6378	36.5165	24.5121	14.3555	16.182	14.9078	10.007	824±14	741±16	782±15	786±10	0.00726269	1165.19	50.6604	-1	0	0	0	0	0		-100
10910421	Cyp11a1	Cyp11a1	cytochrome P450, family 11, subfamily a, polypeptide 1	54.7659	24		58.988	52.3929	52.3991	56.4166	3.88843	3.79775	2.46236	3.92935	1.58744	1.55042	1.00526	1.60415	59±2	52±2	52±1	56±2	0.0121066	12.674	5.28357	-1	-1	0	0	0	0		-100
10917505	Cyp19a1	Cyp19a1	cytochrome P450, family 19, subfamily a, polypeptide 1	46.79	22		52.0629	43.8204	46.209	46.2925	2.67285	3.90037	2.8819	3.49994	1.09119	1.59232	1.17653	1.42884	52±1	44±2	46±1	46±1	0.00291646	10.4919	4.80727	-1	-1	-1	0	0	0		-100
10760667	Cyp2w1	Cyp2w1	cytochrome P450, family 2, subfamily w, polypeptide 1	72.7216	24		78.7452	69.4123	67.8911	74.9131	5.45146	6.9778	4.13117	7.81876	2.22555	2.84868	1.68654	3.192	79±2	69±3	68±2	75±3	0.02734	38.65	9.22668	-1	-1	0	0	0	0		-100
10871087	Cyp4a1	Cyp4a1	cytochrome P450, family 4, subfamily a, polypeptide 1	45.0225	20		50.1315	41.4214	43.7702	44.4486	3.52353	2.11945	4.11012	4.78246	1.43847	0.865261	1.67795	1.95243	50±1	41±1	44±2	44±2	0.00806215	14.6773	5.68584	-1	-1	0	0	0	0		-100
10787197	Cyp4f18	Cyp4f18	cytochrome P450, family 4, subfamily f, polypeptide 18	155.821	24		170.253	142.442	144.031	163.701	10.852	24.7434	19.9901	12.5369	4.4303	10.1014	8.16093	5.11816	170±4	142±10	144±8	164±5	0.0313351	306.403	25.9787	-1	-1	0	0	0	0		-100
10889375	Cys1	Cys1	cystin 1	120.896	24		133.425	111.193	116.081	123.791	5.72344	15.0193	15.4999	8.28886	2.33659	6.13158	6.32779	3.38391	133±2	111±6	116±6	124±3	0.025917	137.413	17.3974	-1	0	0	0	0	0		-100
10877573	Dbc1	Dbc1	deleted in bladder cancer 1	3667.58	24		3957.44	3395.82	3804.81	3570.94	132.794	607.805	90.687	149.096	54.2128	248.136	37.0228	60.8682	3957±54	3396±248	3805±37	3571±61	0.0278312	90428.9	446.298	-1	0	0	0	0	0		-100
10776026	Dck	Dck	deoxycytidine kinase	348.584	24		371.976	323.042	348.434	338.676	25.683	29.459	4.00606	34.5079	10.485	12.0266	1.63547	14.0878	372±10	323±12	348±2	339±14	0.0441201	710.421	39.5575	-1	0	0	0	0	0		-100
10716801	Dctn3	Dctn3	dynactin 3	1656.43	24		1711.64	1604.44	1689.57	1648.99	62.1334	89.2339	34.6022	37.3307	25.3659	36.4296	14.1263	15.2402	1712±25	1604±36	1690±14	1649±15	0.0323953	3374.11	86.2086	-1	0	0	0	0	0		-100
10789470	Dcun1d2	Dcun1d2	DCN1, defective in cullin neddylation 1, domain containing 2 (S. cerevisiae)	340.864	24		371.323	323.801	346.577	326.467	36.303	22.7878	25.8303	7.54357	14.8207	9.30307	10.5452	3.07965	371±15	324±9	347±11	326±3	0.017607	646.696	37.7417	-1	0	-1	0	0	0		-100
10833198	Ddx21	Ddx21	DEAD (Asp-Glu-Ala-Asp) box polypeptide 21	525.797	24		545.224	505.89	526.787	501.25	17.9713	17.0747	11.7661	24.1815	7.33675	6.97071	4.80347	9.87204	545±7	506±7	527±5	501±10	0.00212627	336.681	27.232	-1	0	-1	0	0	0		-100
10840840	Defb20	Defb20	defensin beta 20	59.9417	24		70.5584	57.7896	57.674	54.9102	8.6757	5.34241	3.63345	1.86582	3.54184	2.18103	1.48335	0.761719	71±4	58±2	58±1	55±1	0.000427262	30.2064	8.1568	-1	-1	-1	0	0	0		-100
10722890	Det1	Det1	de-etiolated homolog 1 (Arabidopsis)	114.446	24		123.405	111.148	116.532	106.322	7.83351	5.89769	8.81396	3.88721	3.19802	2.40772	3.59828	1.58695	123±3	111±2	117±4	106±2	0.00290999	47.8911	10.2707	-1	0	-1	0	0	0		-100
10738482	Dhx8	Dhx8	DEAH (Asp-Glu-Ala-His) box polypeptide 8	444.801	24		455.976	434.358	453.759	431.89	9.9589	15.2862	13.1455	16.125	4.06571	6.24057	5.36664	6.58299	456±4	434±6	454±5	432±7	0.0110488	189.193	20.4138	-1	0	-1	0	0	-1		-100
10891402	Dio2	Dio2	deiodinase, iodothyronine, type II	125.672	24		145.099	118.271	119.721	118.762	11.1212	6.882	14.3149	8.37085	4.5402	2.80956	5.84404	3.41738	145±5	118±3	120±6	119±3	0.000719982	114.884	15.9074	-1	-1	-1	0	0	0		-100
10799198	Dip2c	Dip2c	DIP2 disco-interacting protein 2 homolog C (Drosophila)	864.851	24		916.093	834.185	846.155	871.208	32.5168	53.9694	20.1833	27.9731	13.2749	22.0329	8.23978	11.42	916±13	834±22	846±8	871±11	0.00397201	1204.57	51.5094	-1	-1	0	0	0	0		-100
10708618	Dlg2	Dlg2	discs, large homolog 2 (Drosophila)	2725.61	24		2871.32	2730.54	2736.74	2656.19	70.0079	99.6872	78.2755	62.1709	28.5806	40.6971	31.9558	25.3812	2871±29	2731±41	2737±32	2656±25	0.00120319	6011.42	115.069	-1	-1	-1	0	0	0		-100
10870971	Dmrta2	Dmrta2	DMRT-like family A2	156.231	24		165.531	150.076	151.085	158.518	10.5963	10.4777	4.90614	6.21694	4.3259	4.27751	2.00292	2.53805	166±4	150±4	151±2	159±3	0.0175742	69.1651	12.3428	-1	-1	0	0	0	0		-100
10881178	Dnajc16	Dnajc16	DnaJ (Hsp40) homolog, subfamily C, member 16	763.716	24		798.946	754.836	780.415	743.737	22.1823	20.3281	30.2382	16.5937	9.0559	8.29891	12.3447	6.77433	799±9	755±8	780±12	744±7	0.0024733	529.562	34.153	-1	0	-1	0	0	-1		-100
10755846	Dnm1l	Dnm1l	dynamin 1-like	1741.87	24		1821.09	1701.04	1724.67	1750.77	44.5768	93.0836	25.7112	46.4684	18.1984	38.0012	10.4966	18.9707	1821±18	1701±38	1725±10	1751±19	0.0102804	3089.24	82.4891	-1	-1	0	0	0	0		-100
10781404	Dok2	Dok2	docking protein 2	187.144	24		214.214	163.634	160.118	198.566	29.9065	22.3474	24.8121	40.7891	12.2093	9.12331	10.1295	16.6521	214±12	164±9	160±10	199±17	0.0173577	940.346	45.5108	-1	-1	0	0	0	0		-100
10728046	Dpf2	Dpf2	D4, zinc and double PHD fingers family 2	787.576	24		813.65	763.221	804.332	751.31	26.1622	42.6122	26.5392	16.2189	10.6807	17.3963	10.8346	6.62132	814±11	763±17	804±11	751±7	0.00292489	816.968	42.4203	-1	0	-1	0	0	-1		-100
10859886	Dpp6	Dpp6	dipeptidylpeptidase 6	2539.94	24		2641.52	2485.73	2616.57	2498.82	66.3329	167.835	40.7389	87.111	27.0803	68.5185	16.6316	35.5629	2642±27	2486±69	2617±17	2499±36	0.0271766	9521.85	144.821	-1	0	0	0	0	0		-100
10775383	Dspp	Dspp	dentin sialophosphoprotein	101.525	24		112.038	92.8901	98.0343	101.965	8.81627	7.69205	11.9338	10.7575	3.59923	3.14026	4.87194	4.39174	112±4	93±3	98±5	102±4	0.030665	100.842	14.9036	-1	0	0	0	0	0		-100
10849230	Duox2	Duox2	dual oxidase 2	64.2887	24		70.3889	58.219	64.6012	64.793	4.83856	5.80384	5.10388	4.47789	1.97533	2.36941	2.08365	1.82809	70±2	58±2	65±2	65±2	0.00792318	25.3843	7.47745	-1	0	0	0	0	0		-100
10779006	Dusp13	Dusp13	dual specificity phosphatase 13	73.6529	24		82.8429	68.8522	64.253	78.3715	4.50869	8.88362	5.60396	9.41639	1.84066	3.62672	2.28781	3.84422	83±2	69±4	64±2	78±4	0.00119495	53.5621	10.8617	-1	-1	0	0	0	1		-100
10787078	Dydc1	Dydc1	DPY30 domain containing 1	50.5749	24		55.3086	46.1027	48.3412	52.3603	6.6199	4.45778	4.23556	5.00076	2.70256	1.81988	1.72916	2.04155	55±3	46±2	48±2	52±2	0.035911	27.0179	7.7143	-1	0	0	0	0	0		-100
10902625	Dyrk2	Dyrk2	dual-specificity tyrosine-(Y)-phosphorylation regulated kinase 2	1869.76	24		1952.06	1804.59	1813.31	1911.58	41.9084	115.703	74.9592	55.1691	17.109	47.2355	30.6019	22.5227	1952±17	1805±47	1813±31	1912±23	0.0070051	5560.14	110.666	-1	-1	0	0	0	0		-100
10912507	Dzip1l	Dzip1l	DAZ interacting protein 1-like	170.086	24		181.793	162.295	169.358	170.785	8.17279	10.832	8.31651	12.508	3.33653	4.42214	3.3952	5.10637	182±3	162±4	169±3	171±5	0.0333795	101.651	14.9633	-1	0	0	0	0	0		-100
10781220	Ebf2	Ebf2	early B-cell factor 2	56.7062	24		60.9639	53.5203	53.6037	59.7648	4.45487	5.06167	6.28681	3.71492	1.81869	2.06642	2.56658	1.51661	61±2	54±2	54±3	60±2	0.0313154	24.6492	7.36838	-1	0	0	0	0	0		-100
10911534	Ecat1	Ecat1	ES cell associated transcript 1	37.7974	6		41.604	34.4256	38.9111	35.6226	3.99413	4.96037	5.49537	2.18789	1.6306	2.02506	2.24347	0.8932	42±2	34±2	39±2	36±1	0.0458717	18.585	6.39812	-1	0	0	0	0	0		-100
10741892	Efcab9	Efcab9	EF-hand calcium binding domain 9	158.212	24		169.808	150.402	151.839	160.158	7.88351	19.6425	8.22188	8.92523	3.21843	8.019	3.35657	3.64371	170±3	150±8	152±3	160±4	0.0401346	136.334	17.329	-1	-1	0	0	0	0		-100
10719958	Egln2	Egln2	EGL nine homolog 2 (C. elegans)	479.618	24		501.395	460.915	473.143	484.508	15.368	15.9873	16.2268	29.7871	6.27397	6.52681	6.62458	12.1605	501±6	461±7	473±7	485±12	0.0241113	418.745	30.3701	-1	0	0	0	0	0		-100
10901436	Eid3	Eid3	EP300 interacting inhibitor of differentiation 3	104.915	24		112.174	97.7914	98.7397	108.566	10.5033	9.44792	6.78915	5.03877	4.28797	3.8571	2.77166	2.05707	112±4	98±4	99±3	109±2	0.0166252	66.6349	12.1149	-1	-1	0	0	0	0		-100
10744134	Eif4a1	Eif4a1	eukaryotic translation initiation factor 4A1	1830.4	24		1900.26	1774.42	1813.73	1788.68	74.402	102.957	36.8178	35.5777	30.3745	42.0319	15.0308	14.5245	1900±30	1774±42	1814±15	1789±15	0.0194533	4378.16	98.2012	-1	0	-1	0	0	0		-100
10819005	Elovl6	Elovl6	ELOVL fatty acid elongase 6	1746.04	24		1990.91	1658.4	1754.34	1706.64	101.316	180.391	101.294	125.275	41.3621	73.6443	41.3533	51.1434	1991±41	1658±74	1754±41	1707±51	0.00147895	16382.1	189.957	-1	-1	-1	0	0	0		-100
10746416	Eme1	Eme1	essential meiotic endonuclease 1 homolog 1 (S. pombe)	57.6255	24		64.243	54.6122	54.0617	55.5936	4.50221	9.33028	3.42589	6.04953	1.83802	3.80907	1.39861	2.46971	64±2	55±4	54±1	56±2	0.0294192	36.3807	8.95172	-1	-1	0	0	0	0		-100
10778170	Emid1	Emid1	EMI domain containing 1	186.879	24		204.425	181.789	175.73	185.73	8.26729	12.9155	8.71753	9.27553	3.37511	5.27274	3.55892	3.78672	204±3	182±5	176±4	186±4	0.000478128	95.744	14.522	-1	-1	-1	0	0	0		-100
10931285	En1	En1	engrailed homeobox 1	68.1057	24		74.8524	66.5948	60.7887	72.2447	6.49013	2.20037	4.33244	3.66695	2.64958	0.898296	1.76871	1.49703	75±3	67±1	61±2	72±1	0.000173266	20.582	6.73309	-1	-1	0	0	0	1		-100
10914354	Entpd3	Entpd3	ectonucleoside triphosphate diphosphohydrolase 3	124.187	24		137.502	110.479	127.694	124.925	10.8105	16.0474	12.3324	10.276	4.41336	6.55134	5.03469	4.19516	138±4	110±7	128±5	125±4	0.0162667	152.781	18.3445	-1	0	0	0	0	0		-100
10840684	Entpd6	Entpd6	ectonucleoside triphosphate diphosphohydrolase 6	792.726	24		885.324	767.682	786.611	761.423	36.4423	34.7048	69.3543	44.4978	14.8775	14.1682	28.3138	18.1661	885±15	768±14	787±28	761±18	0.00104684	2389.91	72.554	-1	-1	-1	0	0	0		-100
10871874	Epha10	Epha10	EPH receptor A10	193.143	24		204.992	184.991	190.189	196.947	11.0652	8.43462	12.1892	8.45069	4.51733	3.44342	4.97624	3.44998	205±5	185±3	190±5	197±3	0.0231176	105.09	15.2143	-1	0	0	0	0	0		-100
10873706	Epha2	Epha2	Eph receptor A2	74.3781	24		80.7	68.9033	71.4538	75.0971	2.10644	7.782	6.32303	6.16444	0.859951	3.17699	2.58136	2.51662	81±1	69±3	71±3	75±3	0.0179066	34.4383	8.70947	-1	-1	0	0	0	0		-100
10760946	Epo	Epo	erythropoietin	60.0207	24		64.8528	57.944	56.7113	60.2648	2.71479	2.67507	3.0017	1.96914	1.10831	1.09209	1.22544	0.803897	65±1	58±1	57±1	60±1	0.000196453	6.83752	3.88079	-1	-1	-1	0	0	0		-100
10775873	Ereg	Ereg	epiregulin	40.1423	14		45.738	37.2828	39.3179	39.109	4.16083	5.61816	4.40882	1.97838	1.69865	2.29361	1.79989	0.807671	46±2	37±2	39±2	39±1	0.0145892	17.3461	6.18119	-1	-1	-1	0	0	0		-100
10741851	Ergic1	Ergic1	endoplasmic reticulum-golgi intermediate compartment (ERGIC) 1	2604.75	24		2701.47	2582.89	2645.85	2545.29	77.4619	82.1196	101.561	47.8028	31.6237	33.5252	41.462	19.5154	2701±32	2583±34	2646±41	2545±20	0.0158048	6314.45	117.934	-1	0	-1	0	0	0		-100
10879347	Ermap	Ermap	erythroblast membrane-associated protein	90.562	24		96.3204	83.6608	86.2301	92.1149	4.75593	6.92858	3.64897	10.8679	1.9416	2.82858	1.48969	4.4368	96±2	84±3	86±1	92±4	0.0316457	50.6445	10.5618	-1	0	0	0	0	0		-100
10881964	Espn	Espn	espin	126.691	24		140.605	117.387	120.788	129.719	9.05185	9.20077	13.4869	12.6952	3.6954	3.7562	5.50599	5.18279	141±4	117±4	121±6	130±5	0.0124722	129.664	16.8998	-1	-1	0	0	0	0		-100
10925395	Espnl	Espnl	espin-like	89.3673	24		94.6591	85.1934	92.0801	86.4958	6.21453	3.02171	2.43745	7.91505	2.53707	1.23361	0.995083	3.23131	95±3	85±1	92±1	86±3	0.0271073	30.1353	8.1472	-1	0	-1	0	0	0		-100
10720726	Etv2	Etv2	ets variant 2	48.8329	22		53.1554	45.4101	46.8483	49.5884	3.75007	5.03379	4.45081	5.05568	1.53096	2.05504	1.81704	2.06397	53±2	45±2	47±2	50±2	0.0493727	20.9747	6.79702	-1	0	0	0	0	0		-100
10747665	Etv4	Etv4	ets variant 4	139.409	24		145.63	134.949	134.45	140.4	6.355	5.43729	5.09676	3.01216	2.59442	2.21977	2.08074	1.22971	146±3	135±2	134±2	140±1	0.00418642	26.0756	7.57859	-1	-1	0	0	0	0		-100
10714348	Fam108b1	Fam108b1	family with sequence similarity 108, member B1	440.047	24		457.78	426.677	447.113	430.559	23.8906	13.7346	18.2671	15.8177	9.75328	5.60711	7.45753	6.45755	458±10	427±6	447±7	431±6	0.0360988	343.568	27.5091	-1	0	0	0	0	0		-100
10862308	Fam115a	Fam115a	family with sequence similarity 115, member A	968.643	24		1037.28	943	969.984	963.085	55.2452	37.7552	40.1592	29.3455	22.5537	15.4135	16.3949	11.9803	1037±23	943±15	970±16	963±12	0.00692706	1754.29	62.1615	-1	-1	-1	0	0	0		-100
10780868	Fam123a	Fam123a	family with sequence similarity 123A	660.681	24		712.147	627.992	632.749	669.16	29.5076	51.9057	31.0962	45.8902	12.0464	21.1904	12.695	18.7346	712±12	628±21	633±13	669±19	0.00702106	1604.98	59.4574	-1	-1	0	0	0	0		-100
10768931	Fam163a	Fam163a	family with sequence similarity 163, member A	297.744	24		318.678	279.575	302.806	305.887	15.7571	26.3185	12.6705	26.7133	6.43281	10.7445	5.17271	10.9057	319±6	280±11	303±5	306±11	0.0457752	441.2	31.1737	-1	0	0	0	0	0		-100
10927277	Fam168b	Fam168b	family with sequence similarity 168, member B	1057.18	24		1124.84	1025.49	1058.61	1033.75	41.8452	55.3937	76.1831	45.5137	17.0832	22.6144	31.1016	18.5809	1125±17	1025±23	1059±31	1034±19	0.0300622	3179.25	83.6823	-1	0	-1	0	0	0		-100
10884831	Fam179b	Fam179b	family with sequence similarity 179, member B	1142.03	24		1175.65	1122.13	1150.55	1136.25	21.5998	37.3496	28.3525	33.1638	8.81808	15.2479	11.5749	13.5391	1176±9	1122±15	1151±12	1136±14	0.0471447	917.434	44.953	-1	0	0	0	0	0		-100
10706083	Fam187b	Fam187b	family with sequence similarity 187, member B	44.5115	18		50.7745	41.4819	42.994	42.7863	5.30503	4.32806	5.62001	4.39902	2.16577	1.76692	2.29436	1.79589	51±2	41±2	43±2	43±2	0.0192621	24.7539	7.38402	-1	-1	-1	0	0	0		-100
10790467	Fam25a	Fam25a	family with sequence similarity 25, member A	159.685	24		178.966	144.52	147.976	165.264	7.88875	19.1171	19.6326	15.0889	3.22057	7.80451	8.01496	6.16002	179±3	145±8	148±8	165±6	0.00567686	254.662	23.6839	-1	-1	0	0	0	0		-100
10854100	Fam71f1	Fam71f1	family with sequence similarity 71, member F1	63.8229	24		68.8687	59.7603	60.4916	66.748	4.05512	7.83961	3.15903	6.17793	1.65549	3.20051	1.28967	2.52213	69±2	60±3	60±1	67±3	0.0249557	29.9363	8.12025	-1	-1	0	0	0	0		-100
10722552	Fan1	Fan1	FANCD2/FANCI-associated nuclease 1	176.441	24		187.139	171.628	171.178	177.439	10.5083	6.14729	13.0009	4.01881	4.29002	2.50962	5.3076	1.64067	187±4	172±3	171±5	177±2	0.0284935	85.7451	13.7428	-1	-1	0	0	0	0		-100
10857838	Fancd2	Fancd2	Fanconi anemia, complementation group D2	122.282	24		127.494	114.645	121.365	120.511	7.34852	4.12956	2.1735	4.59213	3.00002	1.68589	0.887329	1.87473	127±3	115±2	121±1	121±2	0.00414461	24.5934	7.36004	-1	0	0	0	0	0		-100
10859748	Far2	Far2	fatty acyl CoA reductase 2	626.467	24		745.192	573.57	613.952	620.135	95.4891	84.0129	53.027	63.0513	38.9833	34.2981	21.6482	25.7406	745±39	574±34	614±22	620±26	0.00645094	5671.58	111.769	-1	-1	-1	0	0	0		-100
10769231	Faslg	Faslg	Fas ligand (TNF superfamily, member 6)	41.2875	15		46.2654	37.3158	37.1705	41.1283	4.99811	7.33113	5.04986	4.21084	2.04047	2.99292	2.0616	1.71907	46±2	37±3	37±2	41±2	0.0317406	29.2657	8.0288	-1	-1	0	0	0	0		-100
10705485	Fbl	Fbl	fibrillarin	533.182	24		551.047	510.158	523.765	541.957	30.1602	27.3219	10.7817	12.7007	12.3128	11.1541	4.40163	5.18504	551±12	510±11	524±4	542±5	0.0241776	469.574	32.1605	-1	0	0	0	0	0		-100
10742031	Fbll1	Fbll1	fibrillarin-like 1	569.887	24		611.331	551.496	565.942	570.959	23.9284	40.2065	7.6872	17.3734	9.76874	16.4142	3.13829	7.09267	611±10	551±16	566±3	571±7	0.00351757	585.986	35.9265	-1	-1	-1	0	0	0		-100
10748909	Fdxr	Fdxr	ferredoxin reductase	168.824	24		184.016	158.676	163.645	170.599	8.54251	13.1606	13.6121	9.68109	3.48747	5.37279	5.55713	3.95229	184±3	159±5	164±6	171±4	0.00781787	129.092	16.8624	-1	-1	0	0	0	0		-100
10785129	Fgf17	Fgf17	fibroblast growth factor 17	145.519	24		155.206	133.597	139.222	153.615	6.88815	23.1007	5.04448	13.8622	2.81207	9.43083	2.0594	5.65922	155±3	134±9	139±2	154±6	0.0362927	182.097	20.0273	-1	0	0	0	0	0		-100
10900789	Fgf22	Fgf22	fibroblast growth factor 22	321.247	24		348.013	307.392	305.329	330.456	18.8408	27.6951	23.5137	13.3447	7.69174	11.3065	9.59941	5.44794	348±8	307±11	305±10	330±5	0.00768652	447.254	31.3869	-1	-1	0	0	0	0		-100
10730437	Fgf8	Fgf8	fibroblast growth factor 8	130.783	24		140.851	125.025	125.473	133.384	6.38619	10.815	11.0106	7.18775	2.60715	4.41522	4.49507	2.93439	141±3	125±4	125±4	133±3	0.0227474	80.856	13.3453	-1	-1	0	0	0	0		-100
10935729	Fmr1nb	Fmr1nb	fragile X mental retardation 1 neighbor	80.9688	24		94.2877	73.7112	69.5483	83.6036	9.54647	16.2395	11.1602	12.6506	3.89733	6.62974	4.55614	5.16457	94±4	74±7	70±5	84±5	0.0134855	154.394	18.4411	-1	-1	0	0	0	0		-100
10868853	Foxe1	Foxe1	forkhead box E1 (thyroid transcription factor 2)	73.6019	24		80.883	70.1727	69.2403	74.6374	7.55479	5.16041	8.39961	4.10382	3.08423	2.10673	3.42913	1.67538	81±3	70±2	69±3	75±2	0.0276707	43.6246	9.80249	-1	-1	0	0	0	0		-100
10830291	Frk	Frk	fyn-related kinase	38.8353	9		42.7167	36.3018	35.8038	40.3548	2.31034	2.68392	3.6483	2.98425	0.943191	1.0957	1.48941	1.21832	43±1	36±1	36±1	40±1	0.00191869	8.76744	4.39448	-1	-1	0	0	0	1		-100
10933312	Frmpd4	Frmpd4	FERM and PDZ domain containing 4	861.76	24		918.698	838.159	853.946	869.919	27.2411	63.3771	25.257	39.9965	11.1211	25.8736	10.3111	16.3285	919±11	838±26	854±10	870±16	0.0185737	1629.75	59.9144	-1	-1	0	0	0	0		-100
10821408	Fst	Fst	follistatin	115.435	24		126.064	108.809	110.61	116.117	8.95324	7.31485	3.80336	11.1953	3.65515	2.98628	1.55271	4.57048	126±4	109±3	111±2	116±5	0.0100364	69.1493	12.3414	-1	-1	0	0	0	0		-100
10832358	Ftcd	Ftcd	formiminotransferase cyclodeaminase	123.926	24		132.662	112.651	125.199	124.837	9.46863	8.27882	13.7786	9.669	3.86555	3.37981	5.6251	3.94735	133±4	113±3	125±6	125±4	0.0438584	112.586	15.7475	-1	0	0	0	0	0		-100
10909646	Fxyd2	Fxyd2	FXYD domain-containing ion transport regulator 2	129.85	24		140.796	123.891	118.335	133.178	6.73619	9.75488	10.561	6.35841	2.75004	3.98241	4.31151	2.59581	141±3	124±4	118±4	133±3	0.00111339	71.9649	12.5902	-1	-1	0	0	0	1		-100
10849538	Gabpb1	Gabpb1	GA binding protein transcription factor, beta subunit 1	404.479	24		414.684	400.909	395.857	405.285	7.21659	12.8461	5.56215	3.76112	2.94616	5.24441	2.27074	1.53547	415±3	401±5	396±2	405±2	0.00380671	60.3108	11.5257	-1	-1	0	0	0	0		-100
10795462	Gabpb1l	Gabpb1l	GA binding protein transcription factor, beta subunit 1-like	472.775	24		490.028	467.382	465.319	465.705	11.3087	13.1918	7.15459	10.4309	4.61677	5.38555	2.92085	4.25838	490±5	467±5	465±3	466±4	0.00155516	112.394	15.7341	-1	-1	-1	0	0	0		-100
10763000	Galnt9	Galnt9	UDP-N-acetyl-alpha-D-galactosamine:polypeptide N-acetylgalactosaminyltransferase 9	754.707	24		807.2	724.199	791.433	734.528	62.974	60.3591	30.5667	45.2261	25.709	24.6415	12.4788	18.4635	807±26	724±25	791±12	735±18	0.0300465	2594.74	75.5993	-1	0	0	0	0	0		-100
10893899	Gamt	Gamt	guanidinoacetate N-methyltransferase	563.36	24	Down	591.494	534.286	578.024	554.774	35.5109	42.7279	28.3145	11.5521	14.4972	17.4436	11.5594	4.71612	591±14	534±17	578±12	555±5	0.0310537	962.295	46.0389	-1	0	0	0	0	0		-100
10836309	Gapdh-ps1	Gapdh-ps1	glyceraldehyde-3-phosphate dehydrogenase, pseudogene 1	41.4517	14		45.5776	36.3646	39.9245	43.6705	8.24903	4.46722	2.73827	2.79674	3.36765	1.82373	1.1179	1.14176	46±3	36±2	40±1	44±1	0.0356192	26.1398	7.5879	-1	0	0	0	0	0		-100
10826771	Gar1	Gar1	GAR1 ribonucleoprotein homolog (yeast)	179.942	24		194.26	170.557	166.016	186.666	13.585	9.69805	10.644	10.8817	5.54605	3.95921	4.34538	4.44246	194±6	171±4	166±4	187±4	0.00119367	129.342	16.8788	-1	-1	0	0	0	1		-100
10862666	Gars	Gars	glycyl-tRNA synthetase	2300.3	24		2364.92	2265.94	2364.18	2243.09	81.9642	86.9854	49.15	41.3257	33.4618	35.5116	20.0654	16.8711	2365±33	2266±36	2364±20	2243±17	0.00728762	4446.01	98.9592	-1	0	-1	0	0	-1		-100
10901713	Gas2l3	Gas2l3	growth arrest-specific 2 like 3	71.9974	24		76.2421	65.9556	68.9895	72.2488	4.15862	7.39188	6.46684	4.97471	1.69775	3.01772	2.64008	2.03092	76±2	66±3	69±3	72±2	0.0453857	33.5721	8.59923	-1	0	0	0	0	0		-100
10778254	Gck	Gck	glucokinase	85.8272	24		92.9894	80.2542	84.2164	86.4606	4.83171	6.29802	4.28451	4.52375	1.97254	2.57115	1.74914	1.84681	93±2	80±3	84±2	86±2	0.00342146	24.7102	7.37749	-1	-1	0	0	0	0		-100
10911773	Gcm1	Gcm1	glial cells missing homolog 1 (Drosophila)	120.147	24		139.576	111.433	106.561	123.507	21.8518	19.06	7.89565	18.458	8.92098	7.78121	3.22339	7.53544	140±9	111±8	107±3	124±8	0.0206759	308.202	26.0549	-1	-1	0	0	0	0		-100
10874911	Gdap1	Gdap1	ganglioside-induced differentiation-associated-protein 1	727.91	24		774.593	699.886	741.686	718.209	27.6825	27.9577	26.9951	32.283	11.3013	11.4137	11.0207	13.1795	775±11	700±11	742±11	718±13	0.00227994	832.251	42.8152	-1	0	-1	0	0	0		-100
10867593	Gdf6	Gdf6	growth differentiation factor 6	72.7051	24		79.4019	69.2663	70.9729	72.1979	3.41602	5.26948	5.22544	5.41261	1.39458	2.15126	2.13328	2.20969	79±1	69±2	71±2	72±2	0.01171	23.8118	7.24213	-1	-1	0	0	0	0		-100
10710901	Gdpd3	Gdpd3	glycerophosphodiester phosphodiesterase domain containing 3	86.9303	24		93.6081	81.9939	81.3951	91.1113	7.1756	7.97032	6.73593	8.76801	2.92943	3.25387	2.74993	3.57952	94±3	82±3	81±3	91±4	0.0270651	59.0949	11.409	-1	-1	0	0	0	0		-100
10844048	Gfi1b	Gfi1b	growth factor independent 1B transcription repressor	81.4342	24		87.8536	78.6412	71.5017	84.684	4.7019	6.2379	5.39871	6.65383	1.91954	2.54661	2.20401	2.71641	88±2	79±3	72±2	85±3	0.000534263	33.3307	8.56826	-1	-1	0	0	0	1		-100
10851023	Ggt7	Ggt7	gamma-glutamyltransferase 7	688.84	24		736.741	669.066	696.359	678.115	45.2013	33.6192	35.6458	20.0129	18.4533	13.725	14.5523	8.17021	737±18	669±14	696±15	678±8	0.0185619	1215.39	51.7403	-1	0	-1	0	0	0		-100
10893557	Gipc3	Gipc3	GIPC PDZ domain containing family, member 3	290.704	24		320.722	276.987	267.754	300.379	15.7819	16.1334	22.748	11.7624	6.44295	6.58642	9.28681	4.80199	321±6	277±7	268±9	300±5	0.000167209	292.927	25.401	-1	-1	0	0	0	1		-100
10830189	Gja1	Gja1	gap junction protein, alpha 1	2996.91	24		3053.24	2926.21	2966.18	2933.4	32.2249	69.814	123.051	28.5611	13.1558	28.5014	50.2355	11.66	3053±13	2926±29	2966±50	2933±12	0.0329026	5498.68	110.053	-1	0	-1	0	0	0		-100
10879931	Gjb3	Gjb3	gap junction protein, beta 3	68.5413	24		72.9172	66.2834	66.1198	70.5183	4.21402	4.69874	3.99819	2.13202	1.72037	1.91825	1.63226	0.870395	73±2	66±2	66±2	71±1	0.0170119	14.7241	5.69489	-1	-1	0	0	0	0		-100
10879938	Gjb5	Gjb5	gap junction protein, beta 5	51.0136	24		55.3696	49.0368	49.4495	49.9972	4.20434	2.01042	3.94372	1.79231	1.71641	0.82075	1.61002	0.731707	55±2	49±1	49±2	50±1	0.0107082	10.4408	4.79555	-1	-1	-1	0	0	0		-100
10848308	Gjd2	Gjd2	gap junction protein, delta 2	100.952	24		111.887	95.6664	102.615	98.1202	9.89329	9.60804	10.3013	5.35424	4.03892	3.92247	4.20548	2.18586	112±4	96±4	103±4	98±2	0.0319351	80.6613	13.3292	-1	0	-1	0	0	0		-100
10938219	Gk	Gk	glycerol kinase	406.957	24		423.67	398.462	408.17	410.3	12.3156	16.0495	10.3665	16.1358	5.02783	6.55218	4.23212	6.58743	424±5	398±7	408±4	410±7	0.0495169	190.941	20.5078	-1	0	0	0	0	0		-100
10829046	Glp1r	Glp1r	glucagon-like peptide 1 receptor	158.01	24		172.502	151.519	142.995	166.478	18.5325	8.29003	8.22171	14.4936	7.56585	3.38439	3.3565	5.91698	173±8	152±3	143±3	166±6	0.00444272	177.919	19.7962	-1	-1	0	0	0	1		-100
10933393	Glra2	Glra2	glycine receptor, alpha 2	236.566	24	Down	296.862	238.134	210.514	213.88	24.0316	33.2939	9.71475	29.7088	9.81087	13.5922	3.96603	12.1285	297±10	238±14	211±4	214±12	3.14321e-05	642.445	37.6174	-1	-1	-1	0	0	0		-100
10923215	Gls	Gls	glutaminase	2182.11	24		2283.16	2134.68	2189.4	2170.51	82.5182	111.613	49.27	56.2193	33.6879	45.5659	20.1144	22.9515	2283±34	2135±46	2189±20	2171±23	0.0254922	5885.11	113.854	-1	0	0	0	0	0		-100
10731668	Glyr1	Glyr1	glyoxylate reductase 1 homolog (Arabidopsis)	3011.01	24		3252.28	2881.54	2975.79	2976.83	128.601	236.644	116.635	155.344	52.5013	96.6095	47.6159	63.419	3252±53	2882±97	2976±48	2977±63	0.00614607	26072.1	239.64	-1	-1	-1	0	0	0		-100
10920711	Gpd1l	Gpd1l	glycerol-3-phosphate dehydrogenase 1-like	471.916	24		498.052	467.458	476.367	455.638	12.842	32.8919	17.5085	14.1687	5.24273	13.428	7.14784	5.78434	498±5	467±13	476±7	456±6	0.0126107	404.663	29.855	-1	0	-1	0	0	0		-100
10791552	Gpm6a	Gpm6a	glycoprotein m6a	8069.17	24		8483.56	7782.29	7988.35	8055.56	121.729	272.425	248.308	186.84	49.6955	111.217	101.371	76.2772	8484±50	7782±111	7988±101	8056±76	0.000216613	44935.8	314.606	-1	-1	-1	0	0	0		-100
10921969	Gpr111	Gpr111	G protein-coupled receptor 111	46.009	22		49.2313	42.4973	44.3085	47.7942	4.04253	3.94643	2.77941	3.64584	1.65036	1.61112	1.13469	1.48841	49±2	42±2	44±1	48±1	0.0216045	13.1102	5.37373	-1	0	0	0	0	0		-100
10890492	Gpr135	Gpr135	G protein-coupled receptor 135	231.934	24		243.897	224.745	230.636	235.208	11.3537	6.28619	12.4289	5.8341	4.63512	2.56633	5.07406	2.38176	244±5	225±3	231±5	235±2	0.0237043	91.8505	14.2237	-1	0	0	0	0	0		-100
10846185	Gpr155	Gpr155	G protein-coupled receptor 155	1423.86	24		1570.22	1337.97	1461.73	1355.32	112.034	266.51	52.6793	61.3879	45.7377	108.802	21.5062	25.0615	1570±46	1338±109	1462±22	1355±25	0.0418137	19978.3	209.773	-1	0	-1	0	0	0		-100
10796701	Gpr158	Gpr158	G protein-coupled receptor 158	1697.56	24		1760.23	1669.33	1742.69	1681.75	32.7875	84.441	28.8616	58.2865	13.3854	34.4729	11.7827	23.7954	1760±13	1669±34	1743±12	1682±24	0.0249841	2897.25	79.8847	-1	0	0	0	0	0		-100
10803602	Gpr17	Gpr17	G protein-coupled receptor 17	283.076	24		319.532	263.41	276.7	273.42	17.5079	61.2999	15.3323	20.9706	7.14759	25.0256	6.25937	8.56122	320±7	263±25	277±6	273±9	0.0391939	1049.35	48.0762	-1	0	0	0	0	0		-100
10720918	Gramd1a	Gramd1a	GRAM domain containing 1A	750.22	24		795.791	736.076	727.084	743.543	32.0512	45.7777	19.9121	18.9379	13.0848	18.6887	8.12907	7.73136	796±13	736±19	727±8	744±8	0.00407834	910.235	44.7762	-1	-1	-1	0	0	0		-100
10737999	Grb7	Grb7	growth factor receptor bound protein 7	157.143	24		169.758	147.385	150.607	159.156	18.4259	8.98792	8.13552	11.8905	7.52234	3.6693	3.32131	4.85427	170±8	147±4	151±3	159±5	0.0342688	160.976	18.8301	-1	-1	0	0	0	0		-100
10823853	Gria2	Gria2	glutamate receptor, ionotropic, AMPA 2	5195.57	24		5408.31	5034.14	5236.61	5154.59	35.5498	325.338	152.875	164.52	14.5131	132.819	62.4111	67.1652	5408±15	5034±133	5237±62	5155±67	0.0266276	35888.7	281.158	-1	0	0	0	0	0		-100
10936215	Gria3	Gria3	glutamate receptor, ionotrophic, AMPA 3	3030.13	24		3222.14	2895.7	3092.63	2952.56	101.237	289.483	100.522	152.079	41.3299	118.181	41.0378	62.0858	3222±41	2896±118	3093±41	2953±62	0.0197724	29084.6	253.106	-1	0	-1	0	0	0		-100
10900699	Grin3b	Grin3b	glutamate receptor, ionotropic, N-methyl-D-aspartate 3B	105.317	24		118.132	96.5696	102.049	105.841	7.22485	7.27363	5.35852	5.17546	2.94953	2.96945	2.18761	2.11287	118±3	97±3	102±2	106±2	0.000123167	39.4795	9.32517	-1	-1	-1	0	0	0		-100
10789506	Grtp1	Grtp1	growth hormone regulated TBC protein 1	125.188	24		134.126	114.705	122.618	124.112	6.75527	4.88503	11.0584	0.724192	2.75783	1.99431	4.51456	0.29565	134±3	115±2	123±5	124±0	0.00299423	52.0643	10.7088	-1	-1	0	0	0	0		-100
10752382	Gsc2	Gsc2	goosecoid homeobox 2	120.979	24		129.365	113.808	119.885	120.948	6.17789	6.87369	10.9548	4.29409	2.52211	2.80617	4.47229	1.75305	129±3	114±3	120±4	121±2	0.0222495	56.4242	11.1482	-1	0	0	0	0	0		-100
10825931	Gstm4	Gstm4	glutathione S-transferase mu 4	348.797	24		371.028	341.288	342.296	345.861	11.8329	23.8777	19.2644	6.54403	4.83075	9.74803	7.86465	2.67159	371±5	341±10	342±8	346±3	0.0168084	265.809	24.1967	-1	-1	-1	0	0	0		-100
10926337	Guca1b	Guca1b	guanylate cyclase activator 1B	70.2115	24		81.1556	67.0695	66.0111	68.0177	10.5264	11.0111	6.61649	5.05684	4.2974	4.49526	2.70117	2.06444	81±4	67±4	66±3	68±2	0.0211345	72.9344	12.6747	-1	-1	-1	0	0	0		-100
10823903	Gucy1b3	Gucy1b3	guanylate cyclase 1, soluble, beta 3	1130.89	24		1247.78	1023.66	1160.01	1135.07	116.845	172.174	117.085	56.5772	47.7019	70.2895	47.7999	23.0975	1248±48	1024±70	1160±48	1135±23	0.0450551	14283.6	177.374	-1	0	0	0	0	0		-100
10743874	Gucy2e	Gucy2e	guanylate cyclase 2E	99.5099	24		110.547	89.8401	94.1007	103.763	10.2747	7.6539	14.1017	13.4282	4.19464	3.12469	5.757	5.48205	111±4	90±3	94±6	104±5	0.0350148	139.898	17.554	-1	0	0	0	0	0		-100
10730921	Gucy2g	Gucy2g	guanylate cyclase 2G	94.6297	24		103.072	87.7459	89.0716	97.8408	10.2432	5.24618	7.79275	11.1869	4.18175	2.14175	3.18138	4.56704	103±4	88±2	89±3	98±5	0.0300826	82.3196	13.4655	-1	-1	0	0	0	0		-100
10726995	H19	H19	H19, imprinted maternally expressed transcript (non-protein coding)	70.7073	24		81.0875	63.0082	62.0849	67.9755	8.84195	5.12163	10.3529	7.37473	3.60971	2.0909	4.22654	3.01072	81±4	63±2	62±4	68±3	0.00316294	68.6141	12.2936	-1	-1	-1	0	0	0		-100
10906835	H1fnt	H1fnt	H1 histone family, member N, testis-specific	94.3549	24		104.501	89.1117	93.9864	90.2337	8.191	9.58443	3.94717	5.30557	3.34396	3.91283	1.61142	2.16599	105±3	89±4	94±2	90±2	0.00514437	48.5028	10.336	-1	-1	-1	0	0	0		-100
10720829	Hamp	Hamp	hepcidin antimicrobial peptide	106.544	24		114.983	98.7736	104.727	105.473	7.01853	11.7676	8.35368	6.46805	2.8653	4.80412	3.41037	2.64057	115±3	99±5	105±3	105±3	0.0350751	71.4898	12.5485	-1	0	0	0	0	0		-100
10742863	Hand1	Hand1	heart and neural crest derivatives expressed 1	93.5066	24		104.016	86.7742	87.1902	96.8897	11.692	1.18863	7.0371	9.39401	4.77324	0.485258	2.87288	3.83509	104±5	87±0	87±3	97±4	0.00696301	72.5267	12.6392	-1	-1	0	0	0	0		-100
10915024	Hephl1	Hephl1	hephaestin-like 1	82.8268	24		90.4488	74.6009	78.5576	85.6848	6.41383	7.71995	6.51509	9.43882	2.61844	3.15166	2.65978	3.85338	90±3	75±3	79±3	86±4	0.0113159	57.9877	11.3016	-1	-1	0	0	0	0		-100
10874534	Hes5	Hes5	hairy and enhancer of split 5 (Drosophila)	170.692	24		183.884	160.826	171.877	173.026	3.9193	16.7753	15.5479	8.09709	1.60005	6.8485	6.3474	3.30562	184±2	161±7	172±6	173±3	0.0399168	144.155	17.8191	-1	0	0	0	0	0		-100
10813214	Hmgcs1	Hmgcs1	3-hydroxy-3-methylglutaryl-CoA synthase 1 (soluble)	2050.07	24		2230.05	2042.07	2125.88	1990	107.854	187.927	69.2018	60.0926	44.0313	76.7211	28.2515	24.5327	2230±44	2042±77	2126±28	1990±25	0.00922805	12706.8	167.297	-1	0	-1	0	0	0		-100
10777512	Hmx1	Hmx1	H6 family homeobox 1	134.046	24		146.554	121.412	125.875	137.927	11.5503	15.3098	17.4311	13.6173	4.7154	6.25022	7.1162	5.55923	147±5	121±6	126±7	138±6	0.0366246	213.209	21.6707	-1	0	0	0	0	0		-100
10842018	Hnf4a	Hnf4a	hepatocyte nuclear factor 4, alpha	69.7828	24		76.5259	67.01	65.9973	69.2118	4.0059	3.13005	8.04724	5.60386	1.6354	1.27784	3.28527	2.28777	77±2	67±1	66±3	69±2	0.0192064	31.5911	8.34168	-1	-1	0	0	0	0		-100
10723299	Homer2	Homer2	homer homolog 2 (Drosophila)	563.161	24		593.388	543.418	556.723	580.866	27.2416	35.725	11.6819	30.5566	11.1213	14.5847	4.76911	12.4747	593±11	543±15	557±5	581±12	0.0265203	745.605	40.5252	-1	0	0	0	0	0		-100
10788738	Hook3	Hook3	hook homolog 3 (Drosophila)	715.963	24		744.72	693	707.303	711.179	40.542	20.6414	18.4287	23.3475	16.5512	8.42682	7.52349	9.53156	745±17	693±8	707±8	711±10	0.0325093	755.059	40.7813	-1	0	0	0	0	0		-100
10862578	Hoxa10	Hoxa10	homeo box A10	48.3212	24		52.2459	46.2339	46.3368	48.1735	4.68534	2.21862	3.42724	2.09668	1.91278	0.905748	1.39916	0.855964	52±2	46±1	46±1	48±1	0.0201125	11.0611	4.93594	-1	-1	0	0	0	0		-100
10862547	Hoxa2	Hoxa2	homeo box A2	96.0529	24		103.215	90.4117	90.8699	99.5266	9.50307	5.65743	6.59742	8.91216	3.87961	2.30964	2.69339	3.63837	103±4	90±2	91±3	100±4	0.0295966	62.8595	11.7667	-1	-1	0	0	0	0		-100
10737733	Hoxb3	Hoxb3	homeo box B3	223.351	24		242.603	208.048	218.464	226.297	17.6435	14.6305	12.7879	7.41046	7.20293	5.97289	5.22063	3.02531	243±7	208±6	218±5	226±3	0.00344761	184.468	20.1573	-1	-1	0	0	0	0		-100
10737719	Hoxb6	Hoxb6	homeo box B6	34.8682	5		38.7145	31.2285	33.5849	35.6342	5.14238	4.06885	3.09982	4.123	2.09937	1.6611	1.26549	1.68321	39±2	31±2	34±1	36±2	0.0461365	17.4464	6.19904	-1	0	0	0	0	0		-100
10737713	Hoxb8	Hoxb8	homeo box B8	46.4999	23		51.0458	41.5211	48.2205	44.6981	4.33753	3.4025	7.59766	2.56671	1.77079	1.38906	3.10173	1.04786	51±2	42±1	48±3	45±1	0.0249079	24.3127	7.31791	-1	0	0	0	0	0		-100
10921850	Hsp90ab1	Hsp90ab1	heat shock protein 90 alpha (cytosolic), class B member 1	7187.37	24		7338.65	7095.19	7294.92	7070.2	128.878	216.653	63.2822	155.637	52.6144	88.448	25.8349	63.5385	7339±53	7095±88	7295±26	7070±64	0.0101085	21681	218.53	-1	0	-1	0	0	-1		-100
10828154	Hspa1b	Hspa1b	heat shock 70kD protein 1B (mapped)	112.154	24		117.927	104.712	106.472	116.36	5.62835	12.903	8.41715	1.28379	2.29776	5.26763	3.43629	0.524103	118±2	105±5	106±3	116±1	0.0208607	62.4644	11.7297	-1	0	0	0	0	0		-100
10815099	Hspa4l	Hspa4l	heat shock protein 4-like	1063.3	24		1121.57	1018.21	1071.21	1068.07	55.1439	49.4803	40.5024	60.8204	22.5124	20.2002	16.535	24.8298	1122±23	1018±20	1071±17	1068±25	0.0329018	2720.81	77.414	-1	0	0	0	0	0		-100
10937827	Hspa8	Hspa8	heat shock 70kDa protein 8	13379.3	24		13626.2	13206.2	13542.2	13135.8	97.4892	312.937	178.282	330.714	39.7998	127.756	72.7835	135.013	13626±40	13206±128	13542±73	13136±135	0.0058848	60264.2	364.335	-1	0	-1	0	0	-1		-100
10913003	Hyal2	Hyal2	hyaluronoglucosaminidase 2	214.993	24		233.084	201.411	200.718	219.534	12.3215	13.2326	10.5949	17.4687	5.03022	5.40218	4.32537	7.13158	233±5	201±5	201±4	220±7	0.00161656	186.66	20.2767	-1	-1	0	0	0	0		-100
10797597	Iars	Iars	isoleucyl-tRNA synthetase	886.572	24		932.054	876.509	890.424	856.577	41.4349	33.8456	23.0209	37.3752	16.9157	13.8174	9.39826	15.2584	932±17	877±14	890±9	857±15	0.00961258	1200.04	51.4124	-1	0	-1	0	0	0		-100
10910071	Idh3a	Idh3a	isocitrate dehydrogenase 3 (NAD+) alpha	2575.12	24		2697.5	2494.06	2611.29	2569.02	53.4318	71.0636	86.8109	112.961	21.8134	29.0116	35.4404	46.1161	2698±22	2494±29	2611±35	2569±46	0.00649498	7155.6	125.543	-1	0	-1	0	0	0		-100
10849875	Idh3B	Idh3B	isocitrate dehydrogenase 3 (NAD+) beta	2066.29	24		2173.91	2000.1	2112.63	2012.29	73.4602	116.612	65.3431	60.24	29.99	47.6065	26.6762	24.5929	2174±30	2000±48	2113±27	2012±25	0.00401469	6361.47	118.372	-1	0	-1	0	0	0		-100
10940172	Idh3g	Idh3g	isocitrate dehydrogenase 3 (NAD), gamma	2066.62	24		2115.6	2045.42	2088.01	2048.04	39.1375	58.6723	25.6785	21.3705	15.9778	23.9529	10.4832	8.72446	2116±16	2045±24	2088±10	2048±9	0.013861	1421.52	55.9561	-1	0	-1	0	0	0		-100
10768814	Ier5	Ier5	immediate early response 5	363.452	24		385.602	346.184	357.874	364.558	19.5198	26.9046	15.6912	15.3591	7.96893	10.9838	6.4059	6.27033	386±8	346±11	358±6	365±6	0.022033	379.533	28.9131	-1	0	0	0	0	0		-100
10823570	Ift80	Ift80	intraflagellar transport 80 homolog (Chlamydomonas)	602.571	24		644.135	565.215	591.695	624.531	18.5118	62.722	29.8856	50.7134	7.55739	25.6062	12.2007	20.7036	644±8	565±26	592±12	625±21	0.0303106	1830.24	63.4929	-1	0	0	0	0	0		-100
10746556	Igf2bp1	Igf2bp1	insulin-like growth factor 2 mRNA binding protein 1	155.02	24		165.62	148.808	148.663	157.55	6.12912	7.4729	13.7207	9.13836	2.5022	3.0508	5.60143	3.73072	166±3	149±3	149±6	158±4	0.0212469	93.1599	14.3247	-1	-1	0	0	0	0		-100
10727303	Ighmbp2	Ighmbp2	immunoglobulin mu binding protein 2	393.61	24		411.215	382.741	406.042	383.343	13.5564	23.9163	10.5053	23.0494	5.53438	9.76381	4.28879	9.40986	411±6	383±10	406±4	383±9	0.0277896	337.633	27.2705	-1	0	-1	0	0	0		-100
10765751	Igsf9	Igsf9	immunoglobulin superfamily, member 9	123.915	24		134.823	121.069	117.332	124.537	9.88363	6.3176	8.7653	6.26803	4.03497	2.57915	3.57842	2.55891	135±4	121±3	117±4	125±3	0.00869849	64.6669	11.9347	-1	-1	0	0	0	0		-100
10895618	Il22	Il22	interleukin 22	51.8829	22		58.6597	49.0445	48.1242	53.4636	4.96559	7.16677	5.75111	4.27425	2.02719	2.92582	2.34788	1.74495	59±2	49±3	48±2	53±2	0.0162546	30.8136	8.23838	-1	-1	0	0	0	0		-100
10900886	Ilvbl	Ilvbl	ilvB (bacterial acetolactate synthase)-like	203.643	24		214.762	196.142	197.397	205.376	9.86658	8.89291	2.98354	13.8175	4.02801	3.63051	1.21802	5.64098	215±4	196±4	197±1	205±6	0.015346	94.8531	14.4543	-1	-1	0	0	0	0		-100
10727008	Ins2	Ins2	insulin 2	70.8394	24		79.2286	65.4938	67.0567	71.9575	6.07381	8.18408	10.097	4.45911	2.47962	3.34114	4.1221	1.82042	79±2	65±3	67±4	72±2	0.0247794	55.8706	11.0933	-1	-1	0	0	0	0		-100
10787391	Insl3	Insl3	insulin-like 3	187.024	24		197.623	179.108	182.743	187.629	11.1236	7.16342	10.6825	9.58754	4.5412	2.92445	4.3611	3.91409	198±5	179±3	183±4	188±4	0.0284497	97.5849	14.661	-1	-1	0	0	0	0		-100
10781877	Irg1	Irg1	immunoresponsive 1 homolog (mouse)	59.8774	24		65.0781	57.148	56.6917	61.444	3.29812	5.8887	6.62189	2.1172	1.34645	2.40405	2.70337	0.864344	65±1	57±2	57±3	61±1	0.023619	22.8818	7.09931	-1	-1	0	0	0	0		-100
10907559	Itgb7	Itgb7	integrin, beta 7	97.3697	24		105.164	93.997	93.8376	97.598	3.423	9.06906	7.797	5.97382	1.39743	3.70243	3.18311	2.4388	105±1	94±4	94±3	98±2	0.0331125	45.7882	10.0426	-1	-1	0	0	0	0		-100
10838959	Jmjd7	Jmjd7	jumonji domain containing 7	155.989	24		164.73	147.523	154.627	158.13	5.18368	2.56026	11.4584	10.6812	2.11623	1.04522	4.67787	4.36059	165±2	148±1	155±5	158±4	0.0259301	73.0257	12.6826	-1	0	0	0	0	0		-100
10907405	Kb15	Kb15	type II keratin Kb15	104.301	24		114.421	96.8971	97.7323	108.167	4.96011	9.69173	9.37133	8.59992	2.02495	3.95663	3.82583	3.5109	114±2	97±4	98±4	108±4	0.00476849	68.8228	12.3122	-1	-1	0	0	0	0		-100
10837747	Kbtbd4	Kbtbd4	kelch repeat and BTB (POZ) domain containing 4	440.86	24		470.561	419.398	439.743	437.923	43.1176	15.788	11.5911	12.671	17.6027	6.44543	4.73203	5.17292	471±18	419±6	440±5	438±5	0.0216752	619.327	36.9344	-1	0	0	0	0	0		-100
10805396	Kcng2	Kcng2	potassium voltage-gated channel, subfamily G, member 2	563.22	24		603.002	543.78	544.005	572.154	17.43	31.4146	22.7561	21.3414	7.11577	12.8249	9.29014	8.71259	603±7	544±13	544±9	572±9	0.000893758	543.842	34.6105	-1	-1	0	0	0	0		-100
10730475	Kcnip2	Kcnip2	Kv channel-interacting protein 2	1259.81	24		1357.2	1229.09	1254.36	1252.39	62.1097	100.868	22.8391	52.9924	25.3562	41.1794	9.32404	21.6341	1357±25	1229±41	1254±9	1252±22	0.0129741	4033.42	94.2557	-1	-1	-1	0	0	0		-100
10734212	Kcnj12	Kcnj12	potassium inwardly-rectifying channel, subfamily J, member 12	619.919	24		680.043	571.255	575.6	656.852	22.0418	67.2826	64.1581	72.588	8.99852	27.468	26.1924	29.6339	680±9	571±27	576±26	657±30	0.0100764	3550.7	88.4358	-1	-1	0	0	0	0		-100
10710958	Kctd13	Kctd13	potassium channel tetramerisation domain containing 13	1987.88	24		2155.92	1897.1	2002.88	1940.69	96.9024	193.261	66.4412	101.609	39.5602	78.8985	27.1245	41.4817	2156±40	1897±79	2003±27	1941±41	0.00894191	14212.8	176.934	-1	0	-1	0	0	0		-100
10708782	Kctd14	Kctd14	potassium channel tetramerisation domain containing 14	112.7	24		133.311	100.165	103.489	114.494	15.6676	8.90899	5.1382	8.02138	6.39625	3.63708	2.09766	3.27471	133±6	100±4	103±2	114±3	0.00011131	105.187	15.2213	-1	-1	-1	0	0	0		-100
10828447	Kifc1	Kifc1	kinesin family member C1	103.761	24		114.508	98.4634	96.101	105.563	5.76175	15.3775	6.24258	10.1252	2.35223	6.27782	2.54852	4.1336	115±2	98±6	96±3	106±4	0.0195172	95.7527	14.5227	-1	-1	0	0	0	0		-100
10727740	Klc2	Klc2	kinesin light chain 2	1339.31	24		1434.89	1301.09	1373.77	1307.46	88.3506	52.0967	55.995	24.7761	36.069	21.2684	22.8599	10.1148	1435±36	1301±21	1374±23	1307±10	0.00373696	3612.2	89.1984	-1	0	-1	0	0	0		-100
10926441	Klhdc3	Klhdc3	kelch domain containing 3	1546.93	24		1644.93	1511.26	1521.12	1517.01	64.4345	87.532	77.4144	51.698	26.3053	35.7348	31.6043	21.1056	1645±26	1511±36	1521±32	1517±21	0.0110238	4986.04	104.797	-1	-1	-1	0	0	0		-100
10859734	Klhdc5	Klhdc5	kelch domain containing 5	512.271	24		526.851	496.365	509.32	507.448	1.92785	21.6465	16.0684	15.7299	0.787041	8.83713	6.55991	6.42171	527±1	496±9	509±7	507±6	0.0462124	245.404	23.2494	-1	0	0	0	0	0		-100
10787565	Klhl26	Klhl26	kelch-like 26 (Drosophila)	258.889	24		273.974	248.755	264.1	256.986	9.32492	20.2617	6.51553	7.71442	3.80688	8.27181	2.65996	3.1494	274±4	249±8	264±3	257±3	0.0131069	136.144	17.3169	-1	0	0	0	0	0		-100
10721308	Klk1c6	Klk1c6	kallikrein 1-related peptidase C6	121.592	24		134.845	110.99	115.998	122.92	14.9326	8.51657	18.3541	3.74802	6.09619	3.47688	7.49305	1.53012	135±6	111±3	116±7	123±2	0.0315778	166.297	19.1387	-1	0	0	0	0	0		-100
10866144	Klra7	Klra7	killer cell lectin-like receptor, subfamily A, member 7	60.0872	24		64.2282	58.1536	57.0336	60.6678	2.01555	3.99525	4.93588	1.62285	0.822846	1.63105	2.01507	0.662526	64±1	58±2	57±2	61±1	0.00868936	11.5339	5.04032	-1	-1	0	0	0	0		-100
10754410	Kpna1	Kpna1	karyopherin alpha 1	1129.1	24		1173.74	1108.92	1150.34	1113.42	31.9967	21.049	49.6071	49.0881	13.0626	8.59321	20.252	20.0401	1174±13	1109±9	1150±20	1113±20	0.0415238	1644.41	60.1832	-1	0	-1	0	0	0		-100
10784360	Kpna3	Kpna3	karyopherin alpha 3	1191.08	24		1235.9	1175.13	1186.27	1172.44	38.931	24.3586	33.7457	54.9758	15.8935	9.94434	13.7766	22.4438	1236±16	1175±10	1186±14	1172±22	0.04761	1618.79	59.7126	-1	0	-1	0	0	0		-100
10747094	Krt12	Krt12	keratin 12	138.228	24		148.601	129.278	133.138	142.086	9.74581	11.7994	15.3994	4.7225	3.97871	4.81709	6.28677	1.92795	149±4	129±5	133±6	142±2	0.0357035	122.58	16.4316	-1	0	0	0	0	0		-100
10747244	Krt13	Krt13	keratin 13	78.9358	24		88.4239	72.3823	73.9804	80.9803	7.10754	7.06504	4.89318	5.52082	2.90164	2.88429	1.99763	2.25387	88±3	72±3	74±2	81±2	0.00112698	38.1241	9.1637	-1	-1	0	0	0	0		-100
10747207	Krt34	Krt34	keratin 34	62.1088	24		69.4603	61.7583	58.7432	61.6117	4.98953	4.10353	5.47419	4.6625	2.03697	1.67526	2.23483	1.90346	69±2	62±2	59±2	62±2	0.00784506	23.7032	7.22561	-1	-1	-1	0	0	0		-100
10747228	Krt35	Krt35	keratin 35	55.5951	24		64.3405	50.9212	53.7012	53.5098	5.77894	5.06635	3.441	4.0304	2.35924	2.06833	1.40478	1.6454	64±2	51±2	54±1	54±2	0.000480817	21.5829	6.89487	-1	-1	-1	0	0	0		-100
10907501	Krt4	Krt4	keratin 4	35.836	6		42.7645	32.1464	32.8076	34.7576	4.1467	4.09064	2.61071	5.18026	1.69288	1.67	1.06582	2.11483	43±2	32±2	33±1	35±2	0.0010236	16.9034	6.10179	-1	-1	-1	0	0	0		-100
10907491	Krt76	Krt76	keratin 76	81.5575	24		88.3401	73.3542	81.7187	82.3066	5.33472	8.21217	4.48183	6.81594	2.17789	3.3526	1.8297	2.7826	88±2	73±3	82±2	82±3	0.0084236	39.1986	9.29194	-1	0	0	0	0	0		-100
10907357	Krt83	Krt83	keratin 83	164.663	24		187.695	151.378	150.598	172.268	16.4213	19.8885	11.0637	9.5567	6.70397	8.11944	4.51674	3.90151	188±7	151±8	151±5	172±4	0.000728745	210.483	21.5318	-1	-1	0	0	0	1		-100
10899423	Krt86	Krt86	keratin 86	196.263	24		215.665	177.17	183.888	208.493	10.577	23.7543	17.6372	29.4518	4.31803	9.69766	7.20034	12.0236	216±4	177±10	184±7	208±12	0.0181954	458.359	31.7741	-1	-1	0	0	0	0		-100
10752961	Krtap16-5	Krtap16-5	keratin associated protein 16-5	107.183	24		118.569	97.555	102.111	109.385	1.80116	9.0403	11.6838	6.20792	0.735319	3.69069	4.76988	2.53437	119±1	98±4	102±5	109±3	0.00176106	64.1249	11.8846	-1	-1	0	0	0	0		-100
10747139	Krtap3-3	Krtap3-3	keratin associated protein 3-3	329.828	24		347.897	317.894	320.263	334.805	22.1397	21.1248	14.5633	9.78168	9.03848	8.62415	5.94543	3.99335	348±9	318±9	320±6	335±4	0.0305738	303.931	25.8737	-1	-1	0	0	0	0		-100
10747141	Krtap3-3l1	Krtap3-3l1	keratin associated protein 3-3-like 1	329.828	24		347.897	317.894	320.263	334.805	22.1397	21.1248	14.5633	9.78168	9.03848	8.62415	5.94543	3.99335	348±9	318±9	320±6	335±4	0.0305738	303.931	25.8737	-1	-1	0	0	0	0		-100
10747185	Krtap4-3	Krtap4-3	keratin associated protein 4-3	395.774	24		426.759	378.201	387	402.941	30.5135	21.0511	16.0655	36.2161	12.4571	8.59406	6.55873	14.7851	427±12	378±9	387±7	403±15	0.0379146	751.395	40.6822	-1	0	0	0	0	0		-100
10912567	Ky	Ky	kyphoscoliosis peptidase	66.3655	24		76.2093	58.2926	64.7142	66.0626	6.81152	9.69948	8.24947	6.50131	2.78079	3.9598	3.36783	2.65415	76±3	58±4	65±3	66±3	0.00980934	61.0478	11.5959	-1	0	0	0	0	0		-100
10865597	Lag3	Lag3	lymphocyte-activation gene 3	48.9335	22		52.7005	41.9127	49.2426	46.1867	5.30902	8.05513	3.65977	0.407411	2.1674	3.28849	1.4941	0.166325	53±2	42±3	49±1	46±0	0.0173489	26.0057	7.56842	-1	0	0	0	0	0		-100
10768642	Lamc2	Lamc2	laminin, gamma 2	129.334	24		145.428	116.839	126.993	128.153	13.0089	11.6467	8.53058	16.3368	5.31088	4.75474	3.48259	6.66947	145±5	117±5	127±3	128±7	0.0112777	162.476	18.9176	-1	0	0	0	0	0		-100
10766248	Lefty1	Lefty1	left right determination factor 1	82.7286	24		96.6306	72.374	82.2693	78.0221	15.0534	11.1029	13.9232	13.8586	6.14551	4.53274	5.6841	5.65774	97±6	72±5	82±6	78±6	0.0443048	187.142	20.3028	-1	0	0	0	0	0		-100
10703715	Leng4	Leng4	leukocyte receptor cluster (LRC) member 4	1111.49	24		1215.91	1084.95	1080.83	1121.98	97.9858	106.714	47.6487	83.4403	40.0025	43.5658	19.4525	34.0644	1216±40	1085±44	1081±19	1122±34	0.0495717	7353.73	127.27	-1	-1	0	0	0	0		-100
10767856	Lgr6	Lgr6	leucine-rich repeat-containing G protein-coupled receptor 6	133.278	24		144.513	127.7	124.103	138.878	7.11928	12.5238	11.2525	7.3592	2.90643	5.11283	4.59381	3.00438	145±3	128±5	124±5	139±3	0.00610118	93.9309	14.3838	-1	-1	0	0	0	1		-100
10922260	Lgsn	Lgsn	lengsin, lens protein with glutamine synthetase domain	53.8878	24		58.8457	51.1191	52.8636	52.466	5.89904	5.1576	2.27602	3.32185	2.40827	2.10558	0.929179	1.35614	59±2	51±2	53±1	52±1	0.0332762	19.0248	6.47337	-1	0	0	0	0	0		-100
10843656	Lhx3	Lhx3	LIM homeobox 3	112.53	24		121.693	102.47	112.14	112.453	12.5887	5.93763	8.75691	9.88776	5.13931	2.42403	3.57499	4.03666	122±5	102±2	112±4	112±4	0.034262	95.0344	14.4681	-1	0	0	0	0	0		-100
10721796	Lin7b	Lin7b	lin-7 homolog b (C. elegans)	888.218	24		968.22	832.311	894.226	890.682	29.6789	49.8282	75.7789	37.0223	12.1164	20.3423	30.9366	15.1143	968±12	832±20	894±31	891±15	0.00318294	2626.37	76.0587	-1	0	-1	0	0	0		-100
10852653	Lmbr1	Lmbr1	limb region 1 homolog (mouse)	671.361	24		715.954	645.911	664.106	673.653	30.0799	32.1956	8.60136	38.9333	12.28	13.1438	3.51149	15.8945	716±12	646±13	664±4	674±16	0.00582594	874.693	43.8933	-1	-1	0	0	0	0		-100
10846259	Lnp	Lnp	limb and neural patterns	524.876	24		554.953	508.702	524.554	526.588	18.7462	12.3522	22.8356	19.7911	7.6531	5.04277	9.3226	8.07967	555±8	509±5	525±9	527±8	0.00584287	364.903	28.3504	-1	-1	-1	0	0	0		-100
10935491	LOC100359929	LOC100359929	rCG47031-like	51.9778	24		56.1502	49.2112	49.4034	53.5523	6.66942	3.71124	1.17776	3.63087	2.72278	1.51511	0.480818	1.4823	56±3	49±2	49±0	54±1	0.0341989	18.4395	6.37303	-1	-1	0	0	0	0		-100
10780006	LOC100360082	LOC100360082	rCG38397-like	74.2798	24		87.5126	69.4786	65.4716	73.2047	14.4112	10.5909	10.2685	10.3663	5.88336	4.3237	4.19209	4.23201	88±6	69±4	65±4	73±4	0.02176	134.294	17.1988	-1	-1	0	0	0	0		-100
10915486	LOC100360291	LOC100360291	mCG52721-like	100.423	24		116.757	92.197	97.0145	96.1664	16.5588	11.8147	10.7139	5.46174	6.76011	4.82335	4.37394	2.22975	117±7	92±5	97±4	96±2	0.00973915	139.601	17.5354	-1	-1	-1	0	0	0		-100
10779978	LOC100361156	LOC100361156	rCG64478-like	83.3398	24		100.992	72.5299	75.0586	85.9007	7.98124	15.2288	15.4525	12.6139	3.25833	6.21713	6.30846	5.14959	101±3	73±6	75±6	86±5	0.00605656	170.296	19.3675	-1	-1	0	0	0	0		-100
10936708	LOC100362219	LOC100362219	rCG64297-like	60.8879	24		67.757	53.9708	58.5145	61.6016	9.4489	2.6114	7.34498	6.3032	3.8575	1.0661	2.99858	2.57327	68±4	54±1	59±3	62±3	0.0284208	49.5832	10.4505	-1	0	0	0	0	0		-100
10720745	LOC100362495	LOC100362495	HAUS augmin-like complex, subunit 5	123.219	24		133.538	113.988	120.486	121.342	4.34628	11.1095	8.42239	8.37548	1.77436	4.53545	3.43843	3.41927	134±2	114±5	120±3	121±3	0.00679916	68.0824	12.2458	-1	-1	0	0	0	0		-100
10933538	LOC100362725	LOC100362725	cyclin-dependent kinase-like 5	2448.09	24		2644.13	2328.51	2446.53	2441.96	89.3325	166.721	75.2548	52.3603	36.4698	68.0637	30.7226	21.376	2644±36	2329±68	2447±31	2442±21	0.000475153	10163.7	149.622	-1	-1	-1	0	0	0		-100
10764788	LOC100362915	LOC100362915	rCG46571-like	82.7086	24		88.254	79.3835	80.1572	82.5273	3.96696	4.47281	5.12142	4.37791	1.6195	1.82602	2.09081	1.78727	88±2	79±2	80±2	83±2	0.0141175	20.2991	6.68666	-1	-1	0	0	0	0		-100
10915992	LOC100362981	LOC100362981	LRRGT00010-like	57.781	24		65.669	52.6425	56.5321	56.1553	7.47199	4.22789	4.50743	7.04767	3.05043	1.72603	1.84015	2.8772	66±3	53±2	57±2	56±3	0.0119363	36.8729	9.01207	-1	-1	-1	0	0	0		-100
10790595	LOC100363043	LOC100363043	chromosome 14 open reading frame 119-like	63.4537	24		73.0105	55.9255	57.9765	66.7218	10.6338	5.6188	3.41914	14.2395	4.34125	2.29387	1.39586	5.81327	73±4	56±2	58±1	67±6	0.0260759	92.8395	14.3	-1	-1	0	0	0	0		-100
10846749	LOC100363269	LOC100363269	H/ACA ribonucleoprotein complex subunit 3	309.373	24		335.139	293.028	286.287	321.929	40.6178	24.5046	17.1284	15.3676	16.5822	10.004	6.99264	6.27379	335±17	293±10	286±7	322±6	0.0150483	699.93	39.2643	-1	-1	0	0	0	0		-100
10860125	LOC100364673	LOC100364673	hypercoagulability-related protein-like	94.3265	24		99.9083	91.1229	95.9306	89.8196	6.66814	4.04265	6.80774	4.12358	2.72226	1.65041	2.77925	1.68345	100±3	91±2	96±3	90±2	0.0243236	31.8126	8.37086	-1	0	-1	0	0	0		-100
10808146	LOC100364878	LOC100364878	synaptonemal complex central element protein 1 like-like	167.045	24		184.903	159.377	159.473	164.359	22.0953	7.74237	14.0292	12.6485	9.02036	3.16081	5.7274	5.16372	185±9	159±3	159±6	164±5	0.0304607	234.989	22.7507	-1	-1	0	0	0	0		-100
10747151	LOC100365588	LOC100365588	keratin associated protein 1-3-like	287.231	24		314.996	266.245	260.247	305.993	23.4585	38.273	29.4414	36.8503	9.57688	15.6249	12.0194	15.0441	315±10	266±16	260±12	306±15	0.018307	1038.66	47.8307	-1	-1	0	0	0	0		-100
10809082	LOC100366210	LOC100366210	Y box binding protein 1-like	695.043	24		805.362	612.877	582.472	753.943	95.623	101.225	44.4554	130.991	39.0379	41.3251	18.1489	53.4769	805±39	613±41	582±18	754±53	0.0022151	9598.94	145.406	-1	-1	0	0	0	1		-100
10789246	LOC100909484	LOC100909484	alpha-defensin-related sequence 1-like	42.6134	21		46.7128	40.6087	41.7604	41.3912	4.84366	2.06254	0.744638	1.68946	1.97741	0.842027	0.303997	0.68972	47±2	41±1	42±0	41±1	0.00629031	7.96659	4.18897	-1	-1	-1	0	0	0		-100
10875976	LOC100911088	LOC100911088	uncharacterized LOC100911088	143.557	24		153.106	140.995	140.682	143.395	10.5067	6.08577	6.38786	7.10273	4.28936	2.4845	2.60783	2.89968	153±4	141±2	141±3	143±3	0.0433223	60.8617	11.5782	-1	-1	0	0	0	0		-100
10882873	LOC100912493	LOC100912493	uncharacterized LOC100912493	343.865	24		367.314	336.374	334.041	340.641	8.68594	14.5986	13.3683	11.5651	3.54602	5.95984	5.4576	4.72142	367±4	336±6	334±5	341±5	0.000474543	146.948	17.9909	-1	-1	-1	0	0	0		-100
10738538	LOC303566	LOC303566	E2F1-inducible gene	67.2463	24		74.433	60.9826	63.2343	68.3936	3.92885	8.38847	10.5922	4.03022	1.60395	3.42458	4.32426	1.64533	74±2	61±3	63±4	68±2	0.0260609	52.6755	10.7715	-1	-1	0	0	0	0		-100
10892616	LOC366763	LOC366763	Ig heavy chain V region IR2-like	121.252	24		138.502	113.686	108.289	127.486	7.26224	14.054	13.6925	15.788	2.9648	5.73751	5.58994	6.44542	139±3	114±6	108±6	127±6	0.00345111	170.394	19.373	-1	-1	0	0	0	0		-100
10855569	LOC685406	LOC685406	LRRGT00062	69.4039	24		76.1838	67.0708	66.825	70.0323	6.84759	7.20323	3.84325	4.77361	2.79552	2.9407	1.569	1.94882	76±3	67±3	67±2	70±2	0.0411192	33.1465	8.54456	-1	-1	0	0	0	0		-100
10802805	Loxhd1	Loxhd1	lipoxygenase homology domains 1	62.4185	24		69.3162	59.005	58.8934	61.8279	4.27957	7.71013	4.35076	6.00811	1.74713	3.14765	1.77619	2.4528	69±2	59±3	59±2	62±2	0.0163498	31.8153	8.37122	-1	-1	0	0	0	0		-100
10838451	Lpcat4	Lpcat4	lysophosphatidylcholine acyltransferase 4	894.768	24		958.427	873.726	904.074	888.008	50.226	63.7615	52.6599	21.9432	20.5047	26.0305	21.4983	8.95825	958±21	874±26	904±21	888±9	0.0422039	2376.22	72.3459	-1	0	0	0	0	0		-100
10827309	Lphn2	Lphn2	latrophilin 2	445.529	24		508.238	402.98	453.173	437.22	45.3863	79.3746	42.1719	41.2265	18.5289	32.4045	17.2166	16.8306	508±19	403±32	453±17	437±17	0.0257732	2783.76	78.3044	-1	0	0	0	0	0		-100
10841888	Lpin3	Lpin3	lipin 3	139.02	24		150.382	135.218	128.781	140.732	6.54549	10.2663	12.1067	6.43417	2.67218	4.1912	4.94253	2.62674	150±3	135±4	129±5	141±3	0.00469121	82.9293	13.5153	-1	-1	0	0	0	0		-100
10930383	Lrrc30	Lrrc30	leucine rich repeat containing 30	42.976	19		47.2538	40.843	41.3694	43.489	4.64271	4.6933	3.60741	1.99439	1.89538	1.91603	1.47272	0.814207	47±2	41±2	41±1	43±1	0.0425297	14.7809	5.70586	-1	-1	0	0	0	0		-100
10918004	Lrrc49	Lrrc49	leucine rich repeat containing 49	1412.74	24		1468.08	1372.77	1427.65	1412.25	32.3406	65.2025	27.2036	40.928	13.203	26.6188	11.1058	16.7088	1468±13	1373±27	1428±11	1412±17	0.0125294	1805.83	63.068	-1	0	0	0	0	0		-100
10838081	Lrrc4c	Lrrc4c	leucine rich repeat containing 4C	892.939	24		967.124	865.556	909.837	864.78	56.5764	67.2482	43.7286	39.6056	23.0972	27.454	17.8521	16.1689	967±23	866±27	910±18	865±16	0.0100163	2710.4	77.2659	-1	0	-1	0	0	0		-100
10769634	Lrrc52	Lrrc52	leucine rich repeat containing 52	84.9678	24		94.6768	80.2489	83.3552	80.3054	6.38208	7.40934	8.581	4.85459	2.60547	3.02485	3.50318	1.98188	95±3	80±3	83±4	80±2	0.00574485	47.8553	10.2668	-1	-1	-1	0	0	0		-100
10855363	Lrrc61	Lrrc61	leucine rich repeat containing 61	515.354	24		545.701	499.819	523.972	500.715	19.4198	36.1695	19.1657	23.254	7.92811	14.7661	7.82435	9.49341	546±8	500±15	524±8	501±9	0.0152594	613.629	36.7641	-1	0	-1	0	0	0		-100
10856472	LRRTM1	LRRTM1	leucine rich repeat transmembrane neuronal 1	2077.26	24		2250.98	2052.12	2104.27	2013.59	110.835	91.7642	34.2594	63.5709	45.2481	37.4626	13.9863	25.9527	2251±45	2052±37	2104±14	2014±26	0.000353873	6377.85	118.524	-1	-1	-1	0	0	0		-100
10832917	Lrrtm3	Lrrtm3	leucine rich repeat transmembrane neuronal 3	518.494	24		566.052	491.675	529.016	503.902	45.5731	45.5475	40.5295	34.6779	18.6051	18.5947	16.5461	14.1572	566±19	492±19	529±17	504±14	0.0343092	1732.04	61.7661	-1	0	-1	0	0	0		-100
10872000	Lsm10	Lsm10	LSM10, U7 small nuclear RNA associated	377.818	24		411.223	354.123	338.331	402.656	32.2873	35.0156	35.8135	33.263	13.1812	14.2951	14.6208	13.5796	411±13	354±14	338±15	403±14	0.0033335	1161.15	50.5726	-1	-1	0	0	0	1		-100
10790954	Lsm4	Lsm4	LSM4 homolog, U6 small nuclear RNA associated (S. cerevisiae)	743.894	24		778.893	720.659	743.4	750.422	27.6144	16.7254	33.8375	24.7921	11.2735	6.82813	13.8141	10.1213	779±11	721±7	743±14	750±10	0.0162074	722.625	39.8958	-1	0	0	0	0	0		-100
10888424	Ltbp1	Ltbp1	latent transforming growth factor beta binding protein 1	82.3454	24		88.8421	77.6446	79.6771	84.1384	5.63236	7.39178	6.18256	5.44665	2.2994	3.01768	2.52402	2.22359	89±2	78±3	80±3	84±2	0.0292728	37.7169	9.11463	-1	-1	0	0	0	0		-100
10848628	Ltk	Ltk	leukocyte receptor tyrosine kinase	190.726	24		207.216	180.916	188.032	192.479	7.23101	13.8822	11.9701	6.15381	2.95205	5.66737	4.88679	2.51228	207±3	181±6	188±5	192±3	0.00260318	102.003	14.9892	-1	-1	0	0	0	0		-100
10873015	Luzp1	Luzp1	leucine zipper protein 1	443.354	24		469.536	433.597	456.704	432.347	13.7337	16.9754	25.1089	10.4348	5.60676	6.93019	10.2506	4.25999	470±6	434±7	457±10	432±4	0.00386214	304.865	25.9134	-1	0	-1	0	0	0		-100
10897054	Ly6e	Ly6e	lymphocyte antigen 6 complex, locus E	2034.18	24		2183.24	2002.79	2100.55	1942.13	102.032	98.7074	96.3859	80.5086	41.6542	40.2971	39.3494	32.8675	2183±42	2003±40	2101±39	1942±33	0.00167168	8941.27	140.336	-1	0	-1	0	0	-1		-100
10904528	Lynx1	Lynx1	Ly6/neurotoxin 1	2230.11	24		2418	2223.28	2255.84	2190.56	111.769	189.42	121.183	49.1991	45.6294	77.3305	49.4728	20.0854	2418±46	2223±77	2256±49	2191±20	0.0243713	15342.7	183.832	-1	0	-1	0	0	0		-100
10874080	Lzic	Lzic	leucine zipper and CTNNBIP1 domain containing	148.423	24		155.298	137.644	146.148	148.927	8.70485	8.08084	6.35928	10.3722	3.55374	3.29899	2.59617	4.23442	155±4	138±3	146±3	149±4	0.0228383	72.6412	12.6492	-1	0	0	0	0	0		-100
10755705	Lztr1	Lztr1	leucine-zipper-like transcription regulator 1	653.484	24		672.674	645.093	660.084	643.846	14.7114	17.9902	17.3564	16.7306	6.00592	7.34449	7.0857	6.83025	673±6	645±7	660±7	644±7	0.0251803	278.027	24.7465	-1	0	-1	0	0	0		-100
10921762	Mad2l1bp	Mad2l1bp	MAD2L1 binding protein	311.932	24		334.368	288.095	310.737	314.276	19.4406	18.5415	12.185	23.269	7.93661	7.56954	4.97452	9.49954	334±8	288±8	311±5	314±9	0.00659217	353.392	27.8997	-1	0	0	0	0	0		-100
10849700	Mal	Mal	mal, T-cell differentiation protein	1910.57	24	Down	2146.91	1738.5	1901.25	1845.1	78.3246	388.169	147.041	98.0416	31.9759	158.469	60.0292	40.0253	2147±32	1739±158	1901±60	1845±40	0.0214403	41554.8	302.539	-1	0	0	0	0	0		-100
10771267	Mapk10	Mapk10	mitogen activated protein kinase 10	4687.65	24		5066.57	4568.43	4778.32	4509.5	140.164	230.136	179.852	134.688	57.2218	93.9528	73.4241	54.986	5067±57	4568±94	4778±73	4510±55	9.38204e-05	29606.2	255.366	-1	-1	-1	0	0	-1		-100
10872336	Marcksl1	Marcksl1	MARCKS-like 1	404.237	24		422.838	395.8	394.707	402.388	14.6599	26.9967	17.4057	9.44599	5.98486	11.0214	7.10586	3.85631	423±6	396±11	395±7	402±4	0.0472075	313.199	26.2652	-1	-1	0	0	0	0		-100
10767001	Mat2a	Mat2a	methionine adenosyltransferase II, alpha	1610.11	24		1701.94	1530.72	1576	1590.53	110.965	59.4636	128.337	52.0978	45.3012	24.2759	52.3934	21.2688	1702±45	1531±24	1576±52	1591±21	0.0416582	9033.31	141.057	-1	0	0	0	0	0		-100
10872501	Matn1	Matn1	matrilin 1, cartilage matrix protein	158.063	24		176.758	147.778	140.968	164.136	11.3566	22.957	12.3368	9.31827	4.63632	9.37214	5.03648	3.80417	177±5	148±9	141±5	164±4	0.0017919	207.794	21.3938	-1	-1	0	0	0	1		-100
10933634	Mbtps2	Mbtps2	membrane-bound transcription factor peptidase, site 2	685.293	24		719.579	674.72	679.804	674.721	34.7357	33.7746	18.4911	29.9525	14.1808	13.7884	7.54896	12.2281	720±14	675±14	680±8	675±12	0.0494208	883.742	44.1198	-1	0	-1	0	0	0		-100
10928522	Mdh1b	Mdh1b	malate dehydrogenase 1B, NAD (soluble)	672.532	24		706.209	651.426	666.635	672.34	21.1994	23.7258	15.0529	29.2446	8.65462	9.68603	6.14532	11.939	706±9	651±10	667±6	672±12	0.00542185	521.469	33.8911	-1	-1	0	0	0	0		-100
10746872	Med1	Med1	mediator complex subunit 1	1142.06	24		1176.03	1098.79	1145.84	1139.06	36.3859	55.1665	33.8422	10.6467	14.8545	22.5216	13.816	4.34649	1176±15	1099±23	1146±14	1139±4	0.0203136	1320.33	53.9277	-1	0	0	0	0	0		-100
10778588	Meis1	Meis1	Meis homeobox 1	147.63	24		163.368	139.5	133.179	154.773	15.552	17.3198	12.6103	17.0564	6.34907	7.07079	5.14815	6.96326	163±6	140±7	133±5	155±7	0.0141084	245.207	23.2401	-1	-1	0	0	0	0		-100
10708143	Mesp2	Mesp2	mesoderm posterior 2 homolog (mouse)	116.465	24		130.812	108.89	112.254	114.659	12.6236	9.07924	6.49319	8.73939	5.15357	3.70659	2.65084	3.56784	131±5	109±4	112±3	115±4	0.00454019	90.4843	14.1175	-1	-1	-1	0	0	0		-100
10769301	Mettl13	Mettl13	methyltransferase like 13	180.726	24		194.294	169.902	180.323	177.882	13.9766	12.5645	15.0138	7.6769	5.70594	5.12942	6.12934	3.13408	194±6	170±5	180±6	178±3	0.0317261	159.47	18.7418	-1	0	0	0	0	0		-100
10846116	Mettl8	Mettl8	methyltransferase like 8	149.531	24		158.419	145.442	142.757	149.918	5.48863	6.94578	1.1431	7.2741	2.24072	2.8356	0.466669	2.96964	158±2	145±3	143±0	150±3	0.00161878	34.0772	8.66369	-1	-1	0	0	0	0		-100
10858499	Mfap5	Mfap5	microfibrillar associated protein 5	100.657	24		107.884	91.3234	97.9384	104.512	7.35137	10.7757	11.6861	6.48688	3.00119	4.39916	4.77085	2.64826	108±3	91±4	98±5	105±3	0.0379231	85.6792	13.7375	-1	0	0	0	0	0		-100
10709979	Micalcl	Micalcl	MICAL C-terminal like	82.3789	24		90.314	76.0936	78.4104	82.78	9.33204	8.78094	5.35051	6.6473	3.80979	3.5848	2.18434	2.71375	90±4	76±4	78±2	83±3	0.0266992	58.312	11.3331	-1	-1	0	0	0	0		-100
10703430	Mir125a	Mir125a	microRNA mir-125a	69.5349	24		74.9494	67.8944	67.456	68.4381	6.35525	4.60336	3.15172	2.5009	2.59452	1.87931	1.28668	1.02099	75±3	68±2	67±1	68±1	0.027052	19.3499	6.52846	-1	-1	0	0	0	0		-100
10735868	Mir132	Mir132	microRNA mir-132	37.1495	6		42.1141	31.6782	36.1282	38.3559	6.10042	5.90359	4.6738	4.61854	2.49049	2.41013	1.90807	1.88551	42±2	32±2	36±2	38±2	0.031197	28.4927	7.92205	-1	0	0	0	0	0		-100
10868300	Mir207	Mir207	microRNA mir-207	568.429	24		630.117	505.652	536.404	593.378	46.0432	103.608	44.8579	80.3835	18.7971	42.2978	18.3132	32.8164	630±19	506±42	536±18	593±33	0.0369013	5047.75	105.443	-1	0	0	0	0	0		-100
10726756	Mir210	Mir210	microRNA mir-210	229.567	24		249.05	220.488	219.316	230.048	8.73894	13.3151	13.9853	13.2859	3.56766	5.43587	5.70947	5.42393	249±4	220±5	219±6	230±5	0.00214346	155.343	18.4977	-1	-1	-1	0	0	0		-100
10760840	Mir25	Mir25	microRNA mir-25	107.92	24		121.023	97.1707	100.498	110.973	12.5741	10.8664	11.059	13.8971	5.13336	4.43619	4.51482	5.67349	121±5	97±4	100±5	111±6	0.015778	149.475	18.1449	-1	-1	0	0	0	0		-100
10781353	Mir320	Mir320	microRNA mir-320	145.283	24		159.513	135.005	135.659	153.812	14.1045	15.1072	12.1888	14.9572	5.75815	6.16749	4.97606	6.10626	160±6	135±6	136±5	154±6	0.0145967	198.37	20.903	-1	-1	0	0	0	0		-100
10886784	Mir345	Mir345	microRNA mir-345	101.857	24		112.463	97.1382	95.6611	102.852	2.00366	14.5548	9.37638	4.3312	0.817991	5.94197	3.82789	1.76821	112±1	97±6	96±4	103±2	0.0138238	73.7274	12.7434	-1	-1	0	0	0	0		-100
10754114	Mir568	Mir568	microRNA mir-568	58.6951	22		75.6505	45.7302	47.0265	66.3955	27.5396	13.3969	10.3395	15.5821	11.243	5.46927	4.22108	6.36136	76±11	46±5	47±4	66±6	0.0279502	329.399	26.9359	-1	-1	0	0	0	0		-100
10887066	Mir666	Mir666	microRNA mir-666	152.297	24		166.056	141.002	144.287	159.996	19.4127	15.7087	8.5918	13.5053	7.92521	6.41306	3.50759	5.51352	166±8	141±6	144±4	160±6	0.0274481	218.547	21.9403	-1	0	0	0	0	0		-100
10887072	Mir667	Mir667	microRNA mir-667	384.625	24		414.183	375.485	365.545	387.147	10.6983	38.1525	22.4696	22.3548	4.36757	15.5757	9.17317	9.1263	414±4	375±16	366±9	387±9	0.0171488	600.938	36.3819	-1	-1	0	0	0	0		-100
10815679	Mme	Mme	membrane metallo-endopeptidase	106.063	24		116.942	101.565	106.175	101.143	6.34983	4.30662	6.03044	6.89964	2.59231	1.75817	2.46192	2.81677	117±3	102±2	106±2	101±3	0.000803392	36.6129	8.98024	-1	-1	-1	0	0	0		-100
10939444	Morf4l2	Morf4l2	mortality factor 4 like 2	1381.15	24		1458.6	1348.29	1346.91	1373.82	64.8484	85.825	54.6701	48.5469	26.4742	35.0379	22.319	19.8192	1459±26	1348±35	1347±22	1374±20	0.0232289	4064.12	94.6138	-1	-1	0	0	0	0		-100
10737310	Mpo	Mpo	myeloperoxidase	81.0858	24		89.1492	77.2615	80.2343	78.9074	4.70876	7.10471	4.91941	5.2976	1.92234	2.90049	2.00834	2.16274	89±2	77±3	80±2	79±2	0.00730138	30.2156	8.15805	-1	-1	-1	0	0	0		-100
10855512	Mpp6	Mpp6	membrane protein, palmitoylated 6 (MAGUK p55 subfamily member 6)	765.271	24		826.177	738.545	737.063	781.528	34.2277	30.536	23.591	35.1096	13.9734	12.4663	9.63098	14.3334	826±14	739±12	737±10	782±14	0.000254731	975.449	46.3525	-1	-1	0	0	0	0		-100
10727154	Mrgpre	Mrgpre	MAS-related GPR, member E	426.803	24		470.721	422.841	421.261	409.084	21.5099	41.9863	11.3235	16.0828	8.78136	17.1409	4.6228	6.56576	471±9	423±17	421±5	409±7	0.00173622	594.693	36.1924	-1	-1	-1	0	0	0		-100
10749132	Mrpl38	Mrpl38	mitochondrial ribosomal protein L38	285.873	24		308.627	277.894	284.877	279.309	7.43155	4.69782	11.0932	9.82008	3.03392	1.91788	4.52878	4.00903	309±3	278±2	285±5	279±4	2.4424e-05	76.9413	13.0182	-1	-1	-1	0	0	0		-100
10908308	Mrpl4	Mrpl4	mitochondrial ribosomal protein L4	651.855	24		687.941	630.879	676.002	629.222	23.0533	41.8766	41.6269	14.4207	9.41146	17.096	16.9941	5.88723	688±9	631±17	676±17	629±6	0.00852101	1019.77	47.3938	-1	0	-1	0	0	0		-100
10722885	Mrpl46	Mrpl46	mitochondrial ribosomal protein L46	395.385	24		414.943	378.669	402.948	387.19	29.756	18.8936	19.7411	14.332	12.1478	7.71329	8.05926	5.85103	415±12	379±8	403±8	387±6	0.0487348	464.766	31.9954	-1	0	0	0	0	0		-100
10728845	Ms4a15	Ms4a15	membrane-spanning 4-domains, subfamily A, member 15	318.597	24		343.138	301.208	302.349	327.78	9.03754	28.6287	17.4959	21.3749	3.68956	11.6876	7.14267	8.72627	343±4	301±12	302±7	328±9	0.00443327	394.83	29.4901	-1	-1	0	0	0	0		-100
10787841	Msmo1	Msmo1	methylsterol monooxygenase 1	1489.99	24		1559.28	1444.8	1509.27	1486.17	31.6443	95.6655	47.9401	48.2594	12.9187	39.0553	19.5715	19.7018	1559±13	1445±39	1509±20	1486±20	0.0297527	3407.92	86.6394	-1	0	0	0	0	0		-100
10861817	Mtpn	Mtpn	myotrophin	2612.7	24		2690.22	2566.16	2645.65	2587.81	48.3598	69.1224	59.3802	89.6917	19.7428	28.2191	24.2419	36.6165	2690±20	2566±28	2646±24	2588±37	0.0265203	4666.21	101.38	-1	0	-1	0	0	0		-100
10841974	Mybl2	Mybl2	myeloblastosis oncogene-like 2	85.2667	24		92.2321	77.6604	83.0447	85.5019	6.30924	6.46909	7.55003	6.00383	2.57574	2.641	3.08228	2.45105	92±3	78±3	83±3	86±2	0.0136234	43.7723	9.81907	-1	0	0	0	0	0		-100
10734493	Myh3	Myh3	myosin, heavy chain 3, skeletal muscle, embryonic	133.408	24		143.851	123.307	132.791	136.027	10.0114	4.90972	2.67308	15.8724	4.08715	2.00439	1.09128	6.47989	144±4	123±2	133±1	136±6	0.0238833	99.6295	14.8137	-1	0	0	0	0	0		-100
10913722	Myl3	Myl3	myosin, light chain 3, alkali; ventricular, skeletal, slow	52.6671	24		58.3794	49.903	51.7009	50.4986	4.80634	3.71804	5.66211	3.91436	1.96218	1.51788	2.31155	1.59803	58±2	50±2	52±2	50±2	0.0200998	21.4584	6.87494	-1	0	-1	0	0	0		-100
10778247	Myl7	Myl7	myosin, light chain 7, regulatory	96.888	24		106.299	91.5028	88.2857	103.158	4.9258	7.31882	9.70119	12.048	2.01095	2.9879	3.9605	4.91856	106±2	92±3	88±4	103±5	0.00651062	80.6269	13.3263	-1	-1	0	0	0	1		-100
10734082	Myo15	Myo15	myosin XV	190.809	24		202.56	183.301	179.855	196.904	12.3442	14.4558	13.083	7.46988	5.03951	5.90155	5.34113	3.04957	203±5	183±6	180±5	197±3	0.0122411	143.821	17.7985	-1	-1	0	0	0	0		-100
10895959	Myo1a	Myo1a	myosin IA	67.3725	24		72.185	64.2745	62.7979	70.4064	4.65201	4.12269	5.80835	4.18619	1.89917	1.68308	2.37125	1.70901	72±2	64±2	63±2	70±2	0.00752657	22.763	7.08086	-1	-1	0	0	0	1		-100
10716468	Nanos1	Nanos1	nanos homolog 1 (Drosophila)	164.298	24		178.658	158.533	158.407	163.559	5.29685	14.92	6.04018	12.0333	2.16243	6.09108	2.46589	4.91257	179±2	159±6	158±2	164±5	0.00837487	101.954	14.9856	-1	-1	-1	0	0	0		-100
10806728	Nanos3	Nanos3	nanos homolog 3 (Drosophila)	43.6497	14		50.0223	38.0955	39.5359	46.7518	7.39831	7.77787	6.46249	7.4773	3.02035	3.1753	2.6383	3.0526	50±3	38±3	40±3	47±3	0.0353513	52.8434	10.7886	-1	0	0	0	0	0		-100
10706586	Napsa	Napsa	napsin A aspartic peptidase	73.0909	24		80.396	68.0509	68.7334	71.2861	9.20945	9.73922	5.26581	4.97203	3.75974	3.97602	2.14976	2.02982	80±4	68±4	69±2	71±2	0.0402923	56.091	11.1152	-1	-1	0	0	0	0		-100
10878880	Nasp	Nasp	nuclear autoantigenic sperm protein (histone-binding)	142.262	24		151.143	135.607	145.557	133.405	8.56714	5.40375	11.0385	9.6258	3.49752	2.20607	4.50647	3.92972	151±3	136±2	146±5	133±4	0.0102755	81.911	13.432	-1	0	-1	0	0	0		-100
10930488	Ndc80	Ndc80	NDC80 homolog, kinetochore complex component (S. cerevisiae)	44.1723	9		41.2437	34.7268	37.8715	39.2958	2.59367	4.42118	4.53228	2.54312	1.05886	1.80494	1.85029	1.03823	41±1	35±2	38±2	39±1	0.0466529	12.5737	5.26262	-1	0	0	0	0	0		-100
10851219	Ndrg3	Ndrg3	N-myc downstream regulated gene 3	3890.45	24		4064.52	3816.12	3951.4	3852.08	65.8691	141.175	103.683	18.3654	26.8909	57.6346	42.3283	7.49766	4065±27	3816±58	3951±42	3852±7	0.00141876	8695.28	138.393	-1	0	-1	0	0	0		-100
10818896	Ndst4	Ndst4	N-deacetylase/N-sulfotransferase (heparan glucosaminyl) 4	300.641	24		357.695	245.596	315.184	299.784	46.2315	65.6466	34.128	46.1489	18.8739	26.8001	13.9327	18.8402	358±19	246±27	315±14	300±19	0.0101554	2336.68	71.7415	-1	0	0	0	0	0		-100
10766765	Nek2	Nek2	NIMA (never in mitosis gene a)-related expressed kinase 2	102.292	24		110.44	99.9579	91.4219	103.412	3.93537	8.57262	7.29334	4.5496	1.60661	3.49976	2.97749	1.85737	110±2	100±3	91±3	103±2	0.000452668	38.9923	9.26744	-1	-1	0	0	0	1		-100
10736242	Nek8	Nek8	NIMA (never in mitosis gene a)- related kinase 8	286.52	24		294.61	280.327	279.899	292.69	6.25259	13.6352	5.14418	10.0395	2.55261	5.56653	2.1001	4.0986	295±3	280±6	280±2	293±4	0.0180408	82.9164	13.5142	-1	-1	0	0	0	0		-100
10773891	Nipsnap1	Nipsnap1	nipsnap homolog 1 (C. elegans)	1678.74	24		1778.06	1669.9	1704.36	1626.15	47.8939	84.9407	56.6123	67.1363	19.5526	34.6769	23.1119	27.4083	1778±20	1670±35	1704±23	1626±27	0.00505844	4152.11	95.6324	-1	0	-1	0	0	0		-100
10726290	Nkx1-2	Nkx1-2	NK1 homeobox 2	145.988	24		163.221	132.43	132.766	155.035	7.23351	15.8836	26.1703	24.2457	2.95307	6.48446	10.684	9.89826	163±3	132±6	133±11	155±10	0.0352027	401.813	29.7497	-1	-1	0	0	0	0		-100
10730266	Nkx2-3	Nkx2-3	NK2 homeobox 3	145.552	24		156.887	134.478	138.655	150.445	12.9651	12.4205	15.5769	8.07851	5.29296	5.07066	6.35922	3.29804	157±5	134±5	139±6	150±3	0.0266101	157.739	18.6398	-1	0	0	0	0	0		-100
10934367	Nlgn3	Nlgn3	neuroligin 3	1735.29	24		1894.65	1702.31	1711.72	1698.36	40.1966	116.305	60.9579	37.7874	16.4102	47.4811	24.886	15.4266	1895±16	1702±47	1712±25	1698±15	0.000149377	4626.56	100.949	-1	-1	-1	0	0	0		-100
10809665	Nod2	Nod2	nucleotide-binding oligomerization domain containing 2	69.8479	24		77.5454	64.7898	62.5222	75.6387	10.5507	4.28007	3.65388	10.982	4.30729	1.74733	1.49169	4.48338	78±4	65±2	63±1	76±4	0.0111237	68.4017	12.2745	-1	-1	0	0	0	1		-100
10858827	Nop2	Nop2	NOP2 nucleolar protein homolog (yeast)	515.081	24		539.146	490.091	532.986	485.814	30.031	29.4534	46.6221	16.7164	12.2601	12.0243	19.0334	6.82443	539±12	490±12	533±19	486±7	0.0187401	1065.51	48.445	-1	0	-1	0	0	0		-100
10898281	Npap60	Npap60	nuclear pore associated protein	483.599	24		500.786	476.081	477.634	475.697	16.923	14.5823	14.8446	17.5266	6.90879	5.95319	6.06028	7.1552	501±7	476±6	478±6	476±7	0.0395397	258.96	23.8829	-1	0	-1	0	0	0		-100
10764842	Nphs2	Nphs2	nephrosis 2, idiopathic, steroid-resistant	65.9696	24		76.8221	59.8049	60.4701	67.1777	10.1361	10.0291	10.3247	5.27483	4.13806	4.09435	4.21503	2.15344	77±4	60±4	60±4	67±2	0.0175137	83.5866	13.5687	-1	-1	0	0	0	0		-100
10908670	Npsr1	Npsr1	neuropeptide S receptor 1	290.134	24		326.45	262.404	287.204	288.397	36.1174	53.745	16.3917	28.6834	14.7449	21.9413	6.69187	11.71	326±15	262±22	287±7	288±12	0.0488655	1238.61	52.2322	-1	0	0	0	0	0		-100
10803692	Nrep	Nrep	neuronal regeneration related protein	558.963	24		627.753	513.867	527.724	545.124	60.6908	71.4128	9.8366	50.7633	24.7769	29.1541	4.01578	20.724	628±25	514±29	528±4	545±21	0.00977029	2893.76	79.8365	-1	-1	-1	0	0	0		-100
10748118	Nsf	Nsf	N-ethylmaleimide-sensitive factor	4437.6	24		4616.37	4368.79	4503.75	4419.38	148.555	181.741	127.333	91.6569	60.6473	74.1953	51.9833	37.4188	4616±61	4369±74	4504±52	4419±37	0.0374798	19238.6	205.853	-1	0	0	0	0	0		-100
10756665	Ocm	Ocm	oncomodulin	173.683	24		189.939	158.416	164.696	178.653	6.31579	21.3714	15.59	7.86946	2.57841	8.72484	6.36459	3.21269	190±3	158±9	165±6	179±3	0.00458384	186.909	20.2902	-1	-1	0	0	0	0		-100
10935265	Ocrl	Ocrl	oculocerebrorenal syndrome of Lowe	544.489	24		580.205	538.571	536.414	537.08	21.5048	16.2139	11.0087	25.7829	8.7793	6.61932	4.4943	10.5258	580±9	539±7	536±4	537±11	0.00215266	383.874	29.078	-1	-1	-1	0	0	0		-100
10809411	Ogfod1	Ogfod1	2-oxoglutarate and iron-dependent oxygenase domain containing 1	850.867	24		890.318	817.188	874.373	837.463	58.3516	44.994	38.1466	22.8983	23.8219	18.3687	15.5733	9.3482	890±24	817±18	874±16	837±9	0.0397691	1843.15	63.7164	-1	0	0	0	0	0		-100
10701920	Olig3	Olig3	oligodendrocyte transcription factor 3	38.3966	5		41.2278	35.5461	38.2149	38.1817	4.50682	1.10831	2.24376	2.30103	1.8399	0.452466	0.91601	0.939392	41±2	36±0	38±1	38±1	0.0334191	8.32192	4.28137	-1	0	0	0	0	0		-100
10900905	Olr1088	Olr1088	olfactory receptor 1088	112.374	24		121.301	103.856	107.575	118.054	9.61	3.35499	13.9738	9.73391	3.92327	1.36967	5.7048	3.97385	121±4	104±1	108±6	118±4	0.0283687	102.993	15.0617	-1	0	0	0	0	0		-100
10899004	Olr1107	Olr1107	olfactory receptor 1107	39.2871	9		43.6209	35.8006	36.8777	40.4588	5.06834	1.23112	4.04369	3.89027	2.06914	0.502604	1.65083	1.58819	44±2	36±1	37±2	40±2	0.0128609	15.3648	5.81747	-1	-1	0	0	0	0		-100
10742940	Olr1425	Olr1425	olfactory receptor 1425	103.857	24		117.498	88.5822	97.6042	109.797	12.3515	29.5527	5.74362	9.65431	5.0425	12.0649	2.34482	3.94136	117±5	89±12	98±2	110±4	0.0345174	257.223	23.8027	-1	0	0	0	0	0		-100
10733874	Olr1434	Olr1434	olfactory receptor 1434	47.8118	24		51.369	45.7584	45.6118	48.6303	3.00266	2.57695	5.14425	2.50052	1.22583	1.05203	2.10013	1.02083	51±1	46±1	46±2	49±1	0.0358761	12.3801	5.22196	-1	-1	0	0	0	0		-100
10756774	Olr1572	Olr1572	olfactory receptor 1572	231.785	24		253.564	214.02	217.959	243.096	15.8742	38.8887	15.7332	20.5411	6.4806	15.8762	6.42307	8.38588	254±6	214±16	218±6	243±8	0.0286083	560.875	35.1483	-1	-1	0	0	0	0		-100
10703856	Olr3	Olr3	olfactory receptor 3	51.7167	24		54.9785	49.0434	50.8365	52.2023	3.64458	1.51191	3.78789	2.01904	1.48789	0.617235	1.5464	0.824271	55±1	49±1	51±2	52±1	0.0236962	8.82535	4.40897	-1	0	0	0	0	0		-100
10835837	Olr396	Olr396	olfactory receptor 396	332.824	24		348.911	324.524	338.973	326.899	15.4283	12.8636	7.09187	19.0516	6.29856	5.25154	2.89524	7.77778	349±6	325±5	339±3	327±8	0.034081	206.228	21.313	-1	0	-1	0	0	0		-100
10914023	Osbpl10	Osbpl10	oxysterol binding protein-like 10	398.438	24		425.652	378.227	386.055	407.306	21.4248	27.9078	29.1524	28.7903	8.74664	11.3933	11.9014	11.7536	426±9	378±11	386±12	407±12	0.0331759	726.537	40.0037	-1	0	0	0	0	0		-100
10773849	Osm	Osm	oncostatin M	69.304	24		78.7936	61.2842	64.2585	70.3612	9.94883	10.4959	5.28601	8.13712	4.06159	4.28495	2.15801	3.32197	79±4	61±4	64±2	70±3	0.0140308	74.0173	12.7684	-1	-1	0	0	0	0		-100
10896108	Osr2	Osr2	odd-skipped related 2 (Drosophila)	56.9195	24		61.4673	53.3352	52.5214	58.658	6.18623	2.5934	3.21837	7.05861	2.52552	1.05875	1.31389	2.88167	61±3	53±1	53±1	59±3	0.0248268	27.3242	7.7579	-1	-1	0	0	0	0		-100
10755008	Ostn	Ostn	osteocrin	34.309	4		39.2374	30.279	33.1712	35.3433	5.23761	2.39125	7.10121	2.09953	2.13825	0.976224	2.89906	0.857131	39±2	30±1	33±3	35±1	0.0366869	22.8532	7.09487	-1	0	0	0	0	0		-100
10899826	Pa2g4	Pa2g4	proliferation-associated 2G4	1723.17	24		1748.29	1654.94	1710.31	1708.04	29.8225	48.5616	32.1079	45.6961	12.175	19.8252	13.108	18.6553	1748±12	1655±20	1710±13	1708±19	0.00914611	1551.32	58.455	-1	0	0	0	0	0		-100
10934484	Pabpc1l2b	Pabpc1l2b	poly(A) binding protein, cytoplasmic 1-like 2B	1370.65	24		1445.16	1347.21	1346.14	1379.98	56.0596	79.1429	39.6593	69.0114	22.8862	32.31	16.1908	28.1738	1445±23	1347±32	1346±16	1380±28	0.0428393	3812.89	91.6427	-1	-1	0	0	0	0		-100
10880994	Padi1	Padi1	peptidyl arginine deiminase, type I	100.976	24		111.962	93.964	95.5883	101.997	7.43974	6.25433	5.56481	6.06638	3.03726	2.55332	2.27182	2.47659	112±3	94±3	96±2	102±2	0.000498477	40.6345	9.46059	-1	-1	-1	0	0	0		-100
10740891	Paqr4	Paqr4	progestin and adipoQ receptor family member IV	531.197	24		585.338	499.567	525.793	532.586	20.7024	75.1009	32.2795	38.2352	8.4517	30.6598	13.178	15.6095	585±8	500±31	526±13	533±16	0.029208	1959.11	65.6901	-1	0	0	0	0	0		-100
10840555	Pax1	Pax1	paired box 1	51.2687	23		56.4403	44.8054	49.1412	53.2241	7.94749	7.111	6.31556	3.45749	3.24455	2.90306	2.57831	1.41151	56±3	45±3	49±3	53±1	0.0384485	40.9095	9.49255	-1	0	0	0	0	0		-100
10843216	Pax8	Pax8	paired box 8	63.7456	24		68.0435	59.4523	59.6434	64.8083	5.06383	5.0219	1.60272	4.95565	2.0673	2.05018	0.654307	2.02314	68±2	59±2	60±1	65±2	0.0125796	20.1198	6.65707	-1	-1	0	0	0	0		-100
10884688	Pax9	Pax9	paired box 9	45.2853	19		50.2158	40.5824	45.6895	44.1257	5.27047	6.24379	3.79465	5.06455	2.15166	2.54902	1.54916	2.0676	50±2	41±3	46±2	44±2	0.0391714	26.0566	7.57582	-1	0	0	0	0	0		-100
10785523	Pcdh9	Pcdh9	protocadherin 9	1844.49	24		1941.89	1762.47	1895.11	1829.62	80.7779	150.165	89.7091	19.0482	32.9775	61.3047	36.6236	7.77641	1942±33	1762±61	1895±37	1830±8	0.0328819	9139.66	141.885	-1	0	0	0	0	0		-100
10893877	Pcsk4	Pcsk4	proprotein convertase subtilisin/kexin type 4	177.916	24		188.648	169.235	172.295	183.687	7.869	12.3395	11.4582	13.0353	3.21251	5.03758	4.67777	5.32164	189±3	169±5	172±5	184±5	0.0285295	127.616	16.7658	-1	0	0	0	0	0		-100
10802091	Pde6a	Pde6a	phosphodiesterase 6A, cGMP-specific, rod, alpha	102.184	24		115.066	90.6543	89.4261	109.695	10.1165	17.9131	8.43294	18.033	4.13004	7.31301	3.44273	7.36195	115±4	91±7	89±3	110±7	0.0102482	198.777	20.9244	-1	-1	0	0	0	0		-100
10775038	Pde6b	Pde6b	phosphodiesterase 6B, cGMP-specific, rod, beta	95.0432	24		104.346	91.1865	92.0206	93.5793	5.17865	7.32657	8.05081	8.2561	2.11417	2.99106	3.28673	3.37054	104±2	91±3	92±3	94±3	0.0210024	53.3526	10.8405	-1	-1	0	0	0	0		-100
10875532	Pdp1	Pdp1	pyruvate dehyrogenase phosphatase catalytic subunit 1	269.811	24		298.017	256.261	254.116	270.196	25.4835	28.438	14.4261	27.0415	10.4036	11.6098	5.88943	11.0396	298±10	256±12	254±6	270±11	0.0218511	588.352	35.9989	-1	-1	0	0	0	0		-100
10740966	Pdpk1	Pdpk1	3-phosphoinositide dependent protein kinase-1	1987.16	24		2046.07	1950.65	2017.31	1985.85	43.9034	83.9987	45.0749	39.7543	17.9235	34.2923	18.4018	16.2296	2046±18	1951±34	2017±18	1986±16	0.0490071	2943.24	80.5162	-1	0	0	0	0	0		-100
10759769	Pds5b	Pds5b	PDS5, regulator of cohesion maintenance, homolog B (S. cerevisiae)	1598.57	24		1662.18	1548.33	1596.68	1610.6	34.2209	61.3828	19.563	57.0979	13.9706	25.0594	7.98655	23.3101	1662±14	1548±25	1597±8	1611±23	0.00522219	2060.06	67.3613	-1	0	0	0	0	0		-100
10813133	Pelo	Pelo	pelota homolog (Drosophila)	128.617	24		139.763	121.414	121.095	131.424	7.25107	11.0697	10.3116	7.2934	2.96024	4.51918	4.20968	2.97752	140±3	121±5	121±4	131±3	0.00595173	81.6132	13.4076	-1	-1	0	0	0	0		-100
10744441	Pelp1	Pelp1	proline, glutamate and leucine rich protein 1	318.723	24		334.695	312.331	307.478	322.537	14.2754	18.0834	7.68323	8.40354	5.8279	7.38253	3.13667	3.43073	335±6	312±7	307±3	323±3	0.00704813	156.591	18.5718	-1	-1	0	0	0	0		-100
10929842	Per2	Per2	period homolog 2 (Drosophila)	456.686	24	Down	495.072	444.44	456.027	449.745	18.3067	13.7454	30.3459	31.7472	7.47368	5.61152	12.3887	12.9608	495±7	444±6	456±12	450±13	0.0114972	635.538	37.4147	-1	-1	-1	0	0	0		-100
10732076	Pgp	Pgp	phosphoglycolate phosphatase	529.692	24		564.515	512.687	530.096	519.072	22.4599	25.9097	25.6717	34.4414	9.16922	10.5776	10.4804	14.0607	565±9	513±11	530±10	519±14	0.022046	759.67	40.9057	-1	0	-1	0	0	0		-100
10797836	Phactr1	Phactr1	phosphatase and actin regulator 1	1830.6	24		1932.78	1800.51	1820.29	1815.19	76.4945	128.374	68.8924	21.5044	31.2287	52.4085	28.1252	8.77914	1933±31	1801±52	1820±28	1815±9	0.038939	6379.98	118.544	-1	0	0	0	0	0		-100
10893618	Pias4	Pias4	protein inhibitor of activated STAT, 4	430.865	24		451.199	409.081	432.171	428.508	15.4385	24.6351	15.9618	30.3643	6.30274	10.0572	6.51637	12.3962	451±6	409±10	432±7	429±12	0.0441863	500.164	33.1915	-1	0	0	0	0	0		-100
10726836	Pidd	Pidd	p53-induced death domain protein	109.286	24		115.567	106.72	105.053	103.492	4.38315	9.29154	4.79392	1.16162	1.78941	3.79325	1.95711	0.474229	116±2	107±4	105±2	103±0	0.00792142	31.2053	8.29059	-1	-1	-1	0	0	0		-100
10804821	Piezo2	Piezo2	piezo-type mechanosensitive ion channel component 2	155.168	24		181.654	146.002	160.628	139.488	11.2451	25.2079	15.5591	30.0899	4.59078	10.2911	6.35196	12.2842	182±5	146±10	161±6	139±12	0.016646	469.024	32.1417	-1	0	-1	0	0	0		-100
10735974	Pitpna	Pitpna	phosphatidylinositol transfer protein, alpha	2211.15	24		2285.9	2185.98	2212.76	2180.12	73.8477	56.4682	58.7429	49.4884	30.1482	23.0531	23.9817	20.2036	2286±30	2186±23	2213±24	2180±20	0.0277005	3659.01	89.7744	-1	0	-1	0	0	0		-100
10761470	Piwil1	Piwil1	piwi-like 1 (Drosophila)	109.082	24		118.293	101.669	98.7545	110.825	6.1415	7.65145	2.51519	7.40851	2.50725	3.12369	1.02682	3.02451	118±3	102±3	99±1	111±3	0.000261728	40.1391	9.40274	-1	-1	0	0	0	1		-100
10914966	Piwil4	Piwil4	piwi-like 4 (Drosophila)	98.8669	24		109.141	95.0597	93.3057	98.108	7.49638	8.91633	6.06035	9.72434	3.06038	3.64008	2.47413	3.96994	109±3	95±4	93±2	98±4	0.0149851	66.0755	12.064	-1	-1	0	0	0	0		-100
10712196	Pkp3	Pkp3	plakophilin 3	97.3613	24		105.957	93.1262	91.7924	98.4567	6.76569	10.2426	6.20281	8.19179	2.76208	4.18151	2.53229	3.34429	106±3	93±4	92±3	98±3	0.0249247	61.9166	11.6782	-1	-1	0	0	0	0		-100
10704956	Plaur	Plaur	plasminogen activator, urokinase receptor	285.494	24		317.552	269.431	264.872	285.612	19.8041	12.656	25.7021	14.3169	8.08499	5.16678	10.4928	5.84483	318±8	269±5	265±10	286±6	0.000590409	364.713	28.3431	-1	-1	-1	0	0	0		-100
10890769	Plek2	Plek2	pleckstrin 2	107.123	24		115.963	98.7849	98.3512	111.019	6.76653	14.8352	8.47364	8.64396	2.76242	6.05646	3.45935	3.52888	116±3	99±6	98±3	111±4	0.0132452	96.9405	14.6125	-1	-1	0	0	0	0		-100
10717967	Plg	Plg	plasminogen	74.8359	24		80.8371	70.6085	72.0566	76.4265	3.18973	3.90308	9.12494	3.69649	1.3022	1.59342	3.72524	1.50909	81±1	71±2	72±4	76±2	0.0257582	31.3922	8.31537	-1	-1	0	0	0	0		-100
10878938	Plk3	Plk3	polo-like kinase 3	129.691	24		136.931	121.9	123.768	131.543	8.78681	11.8479	6.03357	9.23761	3.5872	4.83689	2.46319	3.77124	137±4	122±5	124±2	132±4	0.0395348	81.9063	13.4317	-1	0	0	0	0	0		-100
10807700	Pmfbp1	Pmfbp1	polyamine modulated factor 1 binding protein 1	51.6041	24		56.17	49.068	48.2473	53.901	3.16427	3.12728	3.98506	3.75313	1.29181	1.27671	1.6269	1.53221	56±1	49±1	48±2	54±2	0.00281402	12.5798	5.2639	-1	-1	0	0	0	1		-100
10905899	Pnpla5	Pnpla5	patatin-like phospholipase domain containing 5	79.2237	24		86.708	73.7084	73.4024	83.5134	8.0206	6.99151	5.90079	8.13532	3.2744	2.85427	2.40899	3.32123	87±3	74±3	73±2	84±3	0.0104844	53.7994	10.8858	-1	-1	0	0	0	0		-100
10835530	Pomt1	Pomt1	protein-O-mannosyltransferase 1	494.992	24		528.433	479.414	498.446	465.506	28.1935	25.072	39.3527	24.3892	11.5099	10.2356	16.0657	9.95686	528±12	479±10	498±16	466±10	0.0114077	905.587	44.6618	-1	0	-1	0	0	0		-100
10875766	Pou3f2	Pou3f2	POU class 3 homeobox 2	136.124	24		146.782	127.681	133.454	139.586	9.40778	6.25405	10.7539	8.65023	3.84071	2.55321	4.39026	3.53144	147±4	128±3	133±4	140±4	0.014127	81.6499	13.4106	-1	0	0	0	0	0		-100
10922933	Pou3f3	Pou3f3	POU class 3 homeobox 3	5507.49	24		5759.45	5295.91	5323.58	5651.34	172.067	325.044	207.733	333.657	70.2461	132.698	84.8067	136.215	5759±70	5296±133	5324±85	5651±136	0.0166171	70686.9	394.585	-1	-1	0	0	0	0		-100
10894100	Ppap2c	Ppap2c	phosphatidic acid phosphatase type 2c	291.432	24		308.315	272.295	284.174	296.744	10.016	19.523	20.2541	15.0381	4.08902	7.97023	8.26868	6.13929	308±4	272±8	284±8	297±6	0.0109617	274.108	24.5715	-1	0	0	0	0	0		-100
10786163	Ppif	Ppif	peptidylprolyl isomerase F	623.995	24		674.477	564.71	632.387	630.571	39.8917	88.919	41.46	55.2047	16.2857	36.301	16.926	22.5372	674±16	565±36	632±17	631±23	0.0423042	3337.66	85.7416	-1	0	0	0	0	0		-100
10723956	Ppme1	Ppme1	protein phosphatase methylesterase 1	1327.39	24		1399.44	1305.82	1349.72	1281.58	38.5333	63.6656	63.3959	16.5697	15.7312	25.9914	25.8813	6.76455	1399±16	1306±26	1350±26	1282±7	0.00288337	2373.96	72.3116	-1	0	-1	0	0	0		-100
10888250	Prepl	Prepl	prolyl endopeptidase-like	3066.63	24		3252.49	2980.34	3066.82	3049.23	87.085	158.426	142.845	124.508	35.5523	64.677	58.3162	50.8301	3252±36	2980±65	3067±58	3049±51	0.0137333	16728.8	191.957	-1	0	-1	0	0	0		-100
10810210	Prkaca	Prkaca	protein kinase, cAMP-dependent, catalytic, alpha	1391	24		1444.65	1367.57	1399.71	1384.41	55.2397	54.8561	32.0617	20.5093	22.5515	22.3949	13.0892	8.37288	1445±23	1368±22	1400±13	1384±8	0.0381466	1817.73	63.2754	-1	0	0	0	0	0		-100
10783553	Prmt5	Prmt5	protein arginine methyltransferase 5	1008.29	24		1113.65	945.57	998.727	986.689	41.3256	53.2963	42.9377	65.7354	16.8711	21.7581	17.5292	26.8363	1114±17	946±22	999±18	987±27	0.000197071	2669.73	76.6839	-1	-1	-1	0	0	0		-100
10803655	Proc	Proc	protein C	93.748	24		104.325	84.9111	90.8676	94.9843	7.07698	7.22192	11.6145	6.10829	2.88917	2.94833	4.74159	2.4937	104±3	85±3	91±5	95±2	0.0076203	69.4778	12.3707	-1	-1	0	0	0	0		-100
10705987	Prodh2	Prodh2	proline dehydrogenase (oxidase) 2	116.869	24		128.577	109.135	109.197	120.778	4.94969	8.48123	13.8969	14.0671	2.0207	3.46245	5.67337	5.74288	129±2	109±3	109±6	121±6	0.0196574	124.487	16.559	-1	-1	0	0	0	0		-100
10864433	Prok2	Prok2	prokineticin 2	185.262	24		203.7	168.646	185.817	182.012	14.4952	16.8967	12.1282	15.1403	5.91763	6.89804	4.95131	6.18101	204±6	169±7	186±5	182±6	0.00732577	214.429	21.7326	-1	0	0	0	0	0		-100
10926372	Prph2	Prph2	peripherin 2	266.905	24		294.264	256.78	241.065	277.725	14.1239	21.8344	11.7691	22.3306	5.76608	8.91384	4.80473	9.11644	294±6	257±9	241±5	278±9	0.000344175	320.539	26.5712	-1	-1	0	0	0	1		-100
10827840	Prr3	Prr3	proline rich 3	554.104	24		581.359	541.324	545.934	556.062	12.5621	24.2098	22.6387	28.0442	5.12844	9.88363	9.24221	11.449	581±5	541±10	546±9	556±11	0.0315836	506.76	33.4097	-1	-1	0	0	0	0		-100
10795267	Prss16	Prss16	protease, serine, 16 (thymus)	56.7408	24		61.9343	51.2288	55.4027	57.1898	5.98443	4.81887	3.36578	5.66531	2.44314	1.9673	1.37408	2.31285	62±2	51±2	55±1	57±2	0.0191416	25.7408	7.52977	-1	0	0	0	0	0		-100
10854948	Prss2	Prss2	protease, serine, 2	108.834	24		118.645	100.454	107.31	114.228	10.9057	8.85644	7.32599	9.93688	4.45222	3.61563	2.99082	4.05671	119±4	100±4	107±3	114±4	0.0236194	87.9197	13.916	-1	0	0	0	0	0		-100
10740924	Prss33	Prss33	protease, serine, 33	80.1706	24		87.8536	74.3083	82.7017	75.754	10.0683	3.72201	8.08783	3.88736	4.11038	1.5195	3.30184	1.58701	88±4	74±2	83±3	76±2	0.0155535	50.7838	10.5763	-1	0	-1	0	0	0		-100
10726093	Prss36	Prss36	protease, serine, 36	149.258	24		164.313	140.003	140.41	152.157	7.70026	13.935	11.9918	16.8114	3.14362	5.68893	4.89564	6.86324	164±3	140±6	140±5	152±7	0.0144348	168.702	19.2766	-1	-1	0	0	0	0		-100
10913736	Prss44	Prss44	protease, serine, 44	52.7174	24		58.1325	47.3348	51.0205	54.8247	5.96583	4.74198	4.90616	7.27505	2.43554	1.93591	2.00293	2.97003	58±2	47±2	51±2	55±3	0.0353085	34.3624	8.69986	-1	0	0	0	0	0		-100
10871381	Ptch2	Ptch2	patched homolog 2 (Drosophila)	91.5228	24		100.007	85.2436	89.2149	92.5568	5.02155	8.10046	9.13072	3.82847	2.05004	3.307	3.7276	1.56297	100±2	85±3	89±4	93±2	0.0121508	46.2467	10.0928	-1	-1	0	0	0	0		-100
10714832	Pten	Pten	phosphatase and tensin homolog	2129.88	24		2194.94	2087.64	2126.99	2096.72	73.6279	32.0798	79.1159	51.0296	30.0585	13.0965	32.2989	20.8328	2195±30	2088±13	2127±32	2097±21	0.0379772	3975.71	93.579	-1	0	-1	0	0	0		-100
10704018	Ptprh	Ptprh	protein tyrosine phosphatase, receptor type, H	110.952	24		120.047	104.305	101.391	113.532	6.982	9.5087	2.12399	11.4734	2.85039	3.88191	0.867113	4.684	120±3	104±4	101±1	114±5	0.00653203	71.2024	12.5233	-1	-1	0	0	0	0		-100
10844273	Qrfp	Qrfp	pyroglutamylated RFamide peptide	143.728	24		158.256	138.862	133.152	144.775	15.7814	12.872	9.74671	11.5646	6.44274	5.25496	3.97908	4.72122	158±6	139±5	133±4	145±5	0.0181797	160.616	18.809	-1	-1	0	0	0	0		-100
10808751	Rab4a	Rab4a	RAB4A, member RAS oncogene family	995.106	24		1030.37	983.857	1020.61	969.039	13.5186	36.2077	26.2117	34.6376	5.51893	14.7817	10.7009	14.1407	1030±6	984±15	1021±11	969±14	0.00430121	820.623	42.515	-1	0	-1	0	0	-1		-100
10764139	Rabif	Rabif	RAB interacting factor	629.426	24		671.452	610.802	626.284	613.058	20.682	26.542	26.8828	19.6263	8.44339	10.8357	10.9749	8.01239	671±8	611±11	626±11	613±8	0.000927528	552.423	34.8824	-1	-1	-1	0	0	0		-100
10907178	Racgap1	Racgap1	Rac GTPase-activating protein 1	104.402	24		114.133	98.5237	96	104.618	6.87221	8.44923	4.00782	6.90309	2.80557	3.44938	1.63618	2.81817	114±3	99±3	96±2	105±3	0.000796321	44.2248	9.86969	-1	-1	0	0	0	0		-100
10822305	Ralyl	Ralyl	RALY RNA binding protein-like	683.102	24		755.047	692.681	674.577	648.146	29.0871	59.3607	29.9725	25.8638	11.8747	24.2339	12.2362	10.5588	755±12	693±24	675±12	648±11	0.000640248	1376.92	55.0713	-1	-1	-1	0	0	0		-100
10761074	Rasa4	Rasa4	RAS p21 protein activator 4	107.087	24		110.967	99.389	103.304	104.866	6.83617	6.87937	5.89413	3.64093	2.79086	2.80849	2.40627	1.4864	111±3	99±3	103±2	105±1	0.0296928	34.8924	8.7667	-1	0	0	0	0	0		-100
10842104	Rbpjl	Rbpjl	recombination signal binding protein for immunoglobulin kappa J region-like	243.864	24		266.166	235.967	224.234	248.815	13.9616	2.79069	3.31518	16.6324	5.69981	1.13929	1.35341	6.79015	266±6	236±1	224±1	249±7	8.61657e-05	135.163	17.2544	-1	-1	-1	0	0	1		-100
10713496	Rcor2	Rcor2	REST corepressor 2	342.563	24		369.627	336.331	322.92	348.66	27.1611	21.4161	10.8794	8.67291	11.0885	8.74307	4.44151	3.5407	370±11	336±9	323±4	349±4	0.00256863	341.638	27.4318	-1	-1	0	0	0	0		-100
10761180	Rhbdd2	Rhbdd2	rhomboid domain containing 2	797.792	24		850.564	793.642	799.156	773.638	34.5309	44.0543	42.243	22.956	14.0972	17.9851	17.2456	9.37176	851±14	794±18	799±17	774±9	0.0117231	1330.65	54.138	-1	0	-1	0	0	0		-100
10882752	Rhoq	Rhoq	ras homolog gene family, member Q	657.174	24		738.368	602.895	588.754	685.654	66.3968	50.5779	51.7043	120.238	27.1064	20.6483	21.1082	49.0869	738±27	603±21	589±21	686±49	0.0129928	6206.71	116.923	-1	-1	0	0	0	0		-100
10736608	Rhot1	Rhot1	ras homolog gene family, member T1	1289.61	24		1386.47	1231.16	1269.56	1288.64	18.4308	83.7558	26.1445	66.6622	7.52435	34.1931	10.6734	27.2147	1386±8	1231±34	1270±11	1289±27	0.00085401	2915.55	80.1366	-1	-1	-1	0	0	0		-100
10931965	Rhox2	Rhox2	reproductive homeobox on X chromosome 2	99.7442	24		115.409	91.1583	91.8855	99.9072	12.8511	12.8702	13.9299	7.96418	5.24643	5.25423	5.68684	3.25136	115±5	91±5	92±6	100±3	0.00973741	146.087	17.9381	-1	-1	0	0	0	0		-100
10931959	Rhox7	Rhox7	reproductive homeobox 7	175.01	24		194.258	157.78	165.078	180.485	9.36806	13.8701	13.0542	24.6699	3.82449	5.66243	5.32935	10.0715	194±4	158±6	165±5	180±10	0.00653802	268.6	24.3234	-1	-1	0	0	0	0		-100
10931954	Rhox9	Rhox9	reproductive homeobox 9	82.7906	24		93.6501	79.9112	75.9792	83.221	6.81052	7.69063	4.1755	9.03996	2.78038	3.13969	1.70464	3.69055	94±3	80±3	76±2	83±4	0.00282499	50.7514	10.5729	-1	-1	0	0	0	0		-100
10803571	Rit2	Rit2	Ras-like without CAAX 2	1536.66	24		1602.05	1487.24	1549.41	1537.25	43.5099	77.555	53.9265	25.475	17.7628	31.6617	22.0154	10.4001	1602±18	1487±32	1549±22	1537±10	0.0148277	2700.52	77.1249	-1	0	0	0	0	0		-100
10729601	Rln1	Rln1	relaxin 1	389.143	24		410.78	379.424	380.511	392.039	17.6491	22.2064	13.766	4.05472	7.2052	9.06573	5.61994	1.65533	411±7	379±9	381±6	392±2	0.00919931	239.982	22.9911	-1	-1	0	0	0	0		-100
10806779	Rln3	Rln3	relaxin 3	125.376	24		141.983	113.203	117.394	127.89	13.8577	24.3315	8.17674	16.0854	5.65739	9.93329	3.33814	6.56683	142±6	113±10	117±3	128±7	0.0327238	260.856	23.9702	-1	-1	0	0	0	0		-100
10861303	Rnf148	Rnf148	ring finger protein 148	40.5004	9		48.1276	37.0657	36.7158	40.3118	8.67457	4.06394	2.55815	4.02264	3.54138	1.6591	1.04436	1.64224	48±4	37±2	37±1	40±2	0.00624505	29.2596	8.02795	-1	-1	0	0	0	0		-100
10810365	Rnf150	Rnf150	ring finger protein 150	512.484	24		533.876	490.92	531.421	497.736	10.4861	44.4872	1.67167	31.6693	4.28093	18.1618	0.682456	12.9289	534±4	491±18	531±1	498±13	0.0333175	749.564	40.6327	-1	0	0	0	0	0		-100
10748180	Rnf190	Rnf190	ring finger protein 190	70.434	24		78.3193	68.7601	64.4402	70.349	4.19576	6.30119	8.83302	5.23385	1.71291	2.57245	3.60606	2.13671	78±2	69±3	64±4	70±2	0.0106609	40.7326	9.472	-1	-1	0	0	0	0		-100
10734815	Rnf222	Rnf222	ring finger protein 222	66.2854	24		69.2854	61.6266	64.3861	68.7858	5.85374	6.59273	2.84627	3.50628	2.38978	2.69147	1.16199	1.43143	69±2	62±3	64±1	69±1	0.0495154	23.535	7.19992	-1	0	0	0	0	0		-100
10760112	Rnf6	Rnf6	ring finger protein (C3H2C3 type) 6	439.84	24		466.744	422.178	439.768	440.512	21.0541	17.7571	5.52287	20.1675	8.59529	7.24929	2.2547	8.23334	467±9	422±7	440±2	441±8	0.0037327	298.093	25.624	-1	-1	-1	0	0	0		-100
10868171	Rngtt	Rngtt	RNA guanylyltransferase and 5'-phosphatase	481.406	24		504.968	467.13	472.926	480.105	18.3717	8.2275	22.8937	26.9402	7.50023	3.35886	9.3463	10.9983	505±8	467±3	473±9	480±11	0.0300381	431.992	30.8467	-1	-1	0	0	0	0		-100
10749892	Robo1	Robo1	roundabout homolog 1 (Drosophila)	695.334	24		740.298	687.172	715.582	669.038	24.3986	49.6281	25.3563	19.1089	9.9607	20.2606	10.3517	7.80117	740±10	687±20	716±10	669±8	0.00409803	940.459	45.5136	-1	0	-1	0	0	-1		-100
10797499	Ror2	Ror2	receptor tyrosine kinase-like orphan receptor 2	148.222	24		158.765	143.211	145.453	143.992	8.17835	15.1843	6.99897	7.82588	3.3388	6.19895	2.85732	3.1949	159±3	143±6	145±3	144±3	0.042253	95.1487	14.4768	-1	0	-1	0	0	0		-100
10937479	RragB	RragB	Ras-related GTP binding B	2944.98	24		3172.84	2862.77	2893.76	2939.27	86.4471	173.053	55.349	120.482	35.2919	70.6486	22.5961	49.1867	3173±35	2863±71	2894±23	2939±49	0.000677707	12897.5	168.548	-1	-1	-1	0	0	0		-100
10824216	Rrnad1	Rrnad1	ribosomal RNA adenine dimethylase domain containing 1	246.268	24		258.514	235.017	244.66	245.849	10.2894	13.9426	10.2858	14.903	4.20064	5.69203	4.19916	6.08413	259±4	235±6	245±4	246±6	0.0416315	155.075	18.4817	-1	0	0	0	0	0		-100
10827721	RT1-M1-5	RT1-M1-5	RT1 class I, M1, gene 5	36.1227	4		42.0228	31.9281	34.3688	37.7015	3.17528	5.63726	4.50903	0.905909	1.2963	2.3014	1.84081	0.369836	42±1	32±2	34±2	38±0	0.00287144	15.6926	5.87919	-1	-1	0	0	0	0		-100
10827782	RT1-N2	RT1-N2	RT1 class Ib, locus N2	180.232	24		197.02	160.117	170.036	187.686	18.8743	16.7337	18.1397	21.4968	7.70539	6.8315	7.40549	8.77605	197±8	160±7	170±7	188±9	0.0177795	360.898	28.1944	-1	0	0	0	0	0		-100
10890522	Rtn1	Rtn1	reticulon 1	6366.9	24		6621.35	6234.93	6444.25	6314.18	188.932	248.682	138.446	66.867	77.131	101.524	56.5204	27.2983	6621±77	6235±102	6444±57	6314±27	0.00620675	28633.7	251.136	-1	0	-1	0	0	0		-100
10776041	Rufy3	Rufy3	RUN and FYVE domain containing 3	1469.92	24		1511.49	1458.11	1458.72	1474.45	17.9278	46.3665	26.8738	25.3034	7.31898	18.929	10.9712	10.3301	1511±7	1458±19	1459±11	1474±10	0.0215032	895.724	44.4179	-1	-1	0	0	0	0		-100
10823819	Rxfp1	Rxfp1	relaxin/insulin-like family peptide receptor 1	182.67	24		204.268	157.852	185.329	187.549	24.5137	23.0007	16.2464	17.1849	10.0077	9.39002	6.63256	7.01572	204±10	158±9	185±7	188±7	0.0122041	416.688	30.2954	-1	0	0	0	0	0		-100
10705571	Sars2	Sars2	seryl-tRNA synthetase 2, mitochondrial	298.135	24		317.849	282.707	295.094	297.485	14.72	12.2372	15.038	17.6163	6.00943	4.99583	6.13923	7.19181	318±6	283±5	295±6	297±7	0.00880525	229.724	22.4944	-1	-1	0	0	0	0		-100
10730349	Scd1	Scd1	stearoyl-Coenzyme A desaturase 1	376.685	24		421.034	355.673	363.406	383.068	14.9698	44.0096	15.2128	24.7639	6.1114	17.9668	6.2106	10.1098	421±6	356±18	363±6	383±10	0.00215194	689.013	38.9569	-1	-1	0	0	0	0		-100
10909616	Scn2b	Scn2b	sodium channel, voltage-gated, type II, beta	1105.07	24		1187.74	1076.21	1108.23	1121.59	22.4358	68.5236	28.9543	53.1428	9.15939	27.9746	11.8205	21.6954	1188±9	1076±28	1108±12	1122±22	0.00484259	2084.8	67.7647	-1	-1	0	0	0	0		-100
10909328	Scn3b	Scn3b	sodium channel, voltage-gated, type III, beta	3011	24		3261.88	2827.76	3037.28	2969.01	226.911	386.538	95.1377	146.363	92.6359	157.803	38.8398	59.7524	3262±93	2828±158	3037±39	2969±60	0.0371109	53023.9	341.749	-1	0	0	0	0	0		-100
10840750	Sdcbp2	Sdcbp2	syndecan binding protein (syntenin) 2	151.146	24		166.034	141.838	138.872	158.754	11.2558	8.60127	15.3548	9.24044	4.59516	3.51145	6.26856	3.77239	166±5	142±4	139±6	159±4	0.00164555	133.43	17.1434	-1	-1	0	0	0	1		-100
10762324	Sds	Sds	serine dehydratase	96.164	24		103.618	92.4438	93.5654	95.2262	7.97967	9.67157	3.73468	4.9604	3.25768	3.9484	1.52468	2.02507	104±3	92±4	94±2	95±2	0.0467554	46.5947	10.1307	-1	0	0	0	0	0		-100
10796280	Sec61a2	Sec61a2	Sec61 alpha 2 subunit (S. cerevisiae)	916.077	24		960.666	890.959	915.462	909.898	22.4921	46.1723	32.177	28.3643	9.18234	18.8498	13.1362	11.5797	961±9	891±19	915±13	910±12	0.013366	1066.13	48.4591	-1	0	-1	0	0	0		-100
10806545	Sec61g-ps1	Sec61g-ps1	Sec61 gamma subunit, pseudogene 1	81.5382	24		89.8692	73.2143	76.5784	84.9933	8.36112	15.3245	6.24647	8.45658	3.41341	6.25622	2.55011	3.45238	90±3	73±6	77±3	85±3	0.0397996	96.9247	14.6113	-1	0	0	0	0	0		-100
10765186	Sell	Sell	selectin L	68.4115	24		73.0089	63.9576	64.3472	70.3831	2.04879	8.16609	6.46457	6.31945	0.836416	3.33379	2.63915	2.5799	73±1	64±3	64±3	70±3	0.0490453	36.6504	8.98484	-1	0	0	0	0	0		-100
10860327	Sema3c	Sema3c	sema domain, immunoglobulin domain (Ig), short basic domain, secreted, (semaphorin) 3C	488.197	24		614.68	454.163	440.299	444.251	56.5969	33.8498	18.7606	29.6619	23.1056	13.8191	7.659	12.1094	615±23	454±14	440±8	444±12	2.01683e-07	1408.33	55.6958	-1	-1	-1	0	0	0		-100
10799568	Sephs1	Sephs1	selenophosphate synthetase 1	607.622	24		637.81	597.836	589.346	600.244	14.1627	15.469	28.5105	23.9496	5.7819	6.31517	11.6394	9.77737	638±6	598±6	589±12	600±10	0.00513237	468.012	32.107	-1	-1	-1	0	0	0		-100
10833451	Serinc1	Serinc1	serine incorporator 1	5067.85	24		5244.61	4973.37	5121.23	4959.71	88.5843	290.01	87.9829	81.1482	36.1644	118.396	35.9189	33.1286	5245±36	4973±118	5121±36	4960±33	0.0153501	23541.6	227.713	-1	0	-1	0	0	0		-100
10891916	Serpina10	Serpina10	serpin peptidase inhibitor, clade A, member 10	43.9396	21		48.6194	42.6198	42.3779	42.7109	2.30872	2.52444	2.22323	2.61767	0.942532	1.0306	0.907629	1.06866	49±1	43±1	42±1	43±1	0.00054389	5.84825	3.58909	-1	-1	-1	0	0	0		-100
10891991	Serpina3k	Serpina3k	serine (or cysteine) peptidase inhibitor, clade A, member 3K	35.512	6		40.8081	33.1878	32.292	36.9616	4.61874	5.19479	3.38607	4.99262	1.88559	2.12076	1.38236	2.03823	41±2	33±2	32±1	37±2	0.0185879	20.8719	6.78034	-1	-1	0	0	0	0		-100
10744947	Serpinf2	Serpinf2	serpin peptidase inhibitor, clade F (alpha-2 antiplasmin, pigment epithelium derived factor), member 2	72.3354	24		80.7001	67.3857	70.1199	72.8788	8.44413	8.24251	6.08874	1.77058	3.4473	3.36499	2.48572	0.722835	81±3	67±3	70±2	73±1	0.0178188	43.648	9.80512	-1	-1	0	0	0	0		-100
10736119	Sez6	Sez6	seizure related 6 homolog (mouse)	1805.82	24		1914.43	1800.72	1806.33	1812.71	41.7769	114.922	44.7308	78.2209	17.0554	46.9166	18.2613	31.9335	1914±17	1801±47	1806±18	1813±32	0.0466806	5376.39	108.822	-1	0	0	0	0	0		-100
10715448	Sfrp5	Sfrp5	secreted frizzled-related protein 5	106.286	24		114.495	103.573	98.7887	109.978	5.39625	6.99497	5.26778	6.03343	2.20301	2.85568	2.15056	2.46314	114±2	104±3	99±2	110±2	0.00107869	34.846	8.76087	-1	-1	0	0	0	1		-100
10785090	Sftpc	Sftpc	surfactant protein C	48.8475	20		57.826	42.9272	46.0741	49.6837	10.8493	10.0888	4.62672	4.56133	4.4292	4.11874	1.88885	1.86215	58±4	43±4	46±2	50±2	0.0302242	63.5122	11.8277	-1	0	0	0	0	0		-100
10715653	Sfxn3	Sfxn3	sideroflexin 3	567.804	24		629.827	556.426	578.235	522.075	59.7966	59.17	42.4408	16.1521	24.4119	24.1561	17.3264	6.59408	630±24	556±24	578±17	522±7	0.00697562	2220.69	69.9382	-1	0	-1	0	0	0		-100
10788777	Sgk196	Sgk196	protein kinase-like protein SgK196	437.473	24		472.85	419.639	435.507	430.697	30.5349	21.7817	16.1717	32.4668	12.4658	8.89233	6.60207	13.2545	473±12	420±9	436±7	431±13	0.0160582	691.46	39.026	-1	0	-1	0	0	0		-100
10841946	Sgk2	Sgk2	serum/glucocorticoid regulated kinase 2	116.367	24		128.376	108.523	112.108	119.137	10.4564	11.6687	8.23107	12.8173	4.26881	4.76374	3.36032	5.23264	128±4	109±5	112±3	119±5	0.0307844	118.499	16.1558	-1	-1	0	0	0	0		-100
10816378	Sh2d2a	Sh2d2a	SH2 domain containing 2A	77.2982	24		82.2903	71.3102	74.4691	75.2618	3.33429	7.66722	2.76014	5.67293	1.36122	3.13013	1.12682	2.31596	82±1	71±3	74±1	75±2	0.0126567	25.7755	7.53485	-1	-1	0	0	0	0		-100
10791264	Sh2d4a	Sh2d4a	SH2 domain containing 4A	39.9805	13		43.5648	37.9826	37.2246	41.4658	1.05555	2.99403	3.47492	3.0597	0.430928	1.22231	1.41863	1.24912	44±0	38±1	37±1	41±1	0.00302377	7.82168	4.15069	-1	-1	0	0	0	1		-100
10806375	Siah1a	Siah1a	seven in absentia 1A	303.029	24		318.566	288.467	291.889	313.579	14.9126	16.2669	23.0649	24.254	6.08803	6.64094	9.41619	9.90165	319±6	288±7	292±9	314±10	0.0474083	409.031	30.0157	-1	0	0	0	0	0		-100
10823338	Siah2	Siah2	seven in absentia 2	440.433	24		473.885	419.116	437.615	434.585	9.96856	16.2934	16.6808	16.5137	4.06965	6.65175	6.80989	6.74168	474±4	419±7	438±7	435±7	6.07786e-05	227.027	22.3619	-1	-1	-1	0	0	0		-100
10705588	Sirt2	Sirt2	sirtuin 2	2949.36	24		3079.25	2792.68	2880.04	2932.51	106.881	150.725	62.8393	151.187	43.6338	61.5334	25.654	61.7218	3079±44	2793±62	2880±26	2933±62	0.00709836	14843.2	180.815	-1	-1	0	0	0	0		-100
10809337	Slc12a3	Slc12a3	solute carrier family 12 (sodium/chloride transporters), member 3	134.496	24		147.475	127.123	128.121	136.635	9.94311	11.3899	12.5007	6.41366	4.05926	4.6499	5.10338	2.61837	147±4	127±5	128±5	137±3	0.0110387	105.277	15.2278	-1	-1	0	0	0	0		-100
10744485	Slc25a11	Slc25a11	solute carrier family 25 (mitochondrial carrier; oxoglutarate carrier), member 11	1724.51	24		1790.41	1709.58	1715.02	1718.87	20.5597	62.0944	19.5507	52.7464	8.39345	25.3499	7.98155	21.5336	1790±8	1710±25	1715±8	1719±22	0.011258	1755.71	62.1866	-1	-1	-1	0	0	0		-100
10788198	Slc25a4	Slc25a4	solute carrier family 25 (mitochondrial carrier; adenine nucleotide translocator), member 4	5431.51	24		5551.74	5350.99	5435.43	5456.93	72.814	173.382	45.7005	103.414	29.7262	70.7828	18.6571	42.2187	5552±30	5351±71	5435±19	5457±42	0.0396621	11087.9	156.277	-1	0	0	0	0	0		-100
10886786	Slc25a47	Slc25a47	solute carrier family 25, member 47	86.8611	24		95.1973	80.1688	85.2017	87.8149	9.06136	6.93691	10.2844	5.78341	3.69928	2.83198	4.19859	2.36107	95±4	80±3	85±4	88±2	0.0467966	68.374	12.272	-1	0	0	0	0	0		-100
10936312	Slc25a6	Slc25a6	solute carrier family 25 (mitochondrial carrier; adenine nucleotide translocator), member 6	2583.9	24		2707.47	2498.06	2553.18	2580.18	63.8737	58.1757	65.9925	116.785	26.0763	23.7501	26.9413	47.6774	2707±26	2498±24	2553±27	2580±48	0.00259125	6521.36	119.851	-1	-1	-1	0	0	0		-100
10763827	Slc26a9	Slc26a9	solute carrier family 26, member 9	73.7807	24		78.5979	70.2911	71.1584	73.9393	2.25076	8.38495	4.36995	3.46873	0.91887	3.42314	1.78402	1.4161	79±1	70±3	71±2	74±1	0.0425792	24.3264	7.31998	-1	-1	0	0	0	0		-100
10744324	Slc2a4	Slc2a4	solute carrier family 2 (facilitated glucose transporter), member 4	83.3753	24		89.1495	77.4196	80.2914	85.3309	4.24714	7.8337	7.97986	4.97941	1.73389	3.19809	3.25776	2.03284	89±2	77±3	80±3	85±2	0.0292783	40.9485	9.49708	-1	0	0	0	0	0		-100
10872780	Slc30a2	Slc30a2	solute carrier family 30 (zinc transporter), member 2	130.148	24		141.383	123.123	125.673	131.453	8.8532	9.6842	6.32791	6.14947	3.6143	3.95356	2.58336	2.51051	141±4	123±4	126±3	131±3	0.00414599	60.8591	11.578	-1	-1	0	0	0	0		-100
10777037	Slc34a2	Slc34a2	solute carrier family 34 (sodium phosphate), member 2	118.822	24		129.719	109.58	110.084	125.916	10.2852	8.74793	12.3524	14.9904	4.19891	3.57133	5.04285	6.11982	130±4	110±4	110±5	126±6	0.0162451	143.237	17.7623	-1	-1	0	0	0	0		-100
10926581	Slc35b2	Slc35b2	solute carrier family 35, member B2	983.325	24		1054.3	913.378	943.635	1024.84	67.5847	121.831	81.5671	55.7723	27.5913	49.7372	33.2996	22.7689	1054±28	913±50	944±33	1025±23	0.0330699	6896.21	123.247	-1	0	0	0	0	0		-100
10715149	Slc35g1	Slc35g1	solute carrier family 35, member G1	129.465	24		142.033	116.27	122.399	136.202	11.9606	27.3635	4.71	8.31147	4.88289	11.1711	1.92285	3.39314	142±5	116±11	122±2	136±3	0.0317748	219.297	21.9779	-1	0	0	0	0	0		-100
10742766	Slc36a2	Slc36a2	solute carrier family 36 (proton/amino acid symporter), member 2	34.5116	6		39.3556	30.2148	30.3461	37.1298	4.71609	6.98235	2.83381	5.57046	1.92534	2.85053	1.1569	2.27413	39±2	30±3	30±1	37±2	0.0120589	26.3959	7.62499	-1	-1	0	0	0	0		-100
10906608	Slc38a2	Slc38a2	solute carrier family 38, member 2	1512.53	24		1650.74	1378.44	1477.5	1511.19	103.641	115.792	111.794	107.748	42.3111	47.2719	45.6397	43.9878	1651±42	1378±47	1478±46	1511±44	0.00511743	11993.5	162.534	-1	-1	0	0	0	0		-100
10743452	Slc5a10	Slc5a10	solute carrier family 5 (sodium/glucose cotransporter), member 10	132.607	24		142.785	121.677	128.694	137.673	4.75929	13.0068	11.4699	13.5632	1.94297	5.31001	4.68255	5.53714	143±2	122±5	129±5	138±6	0.0251289	124.608	16.567	-1	0	0	0	0	0		-100
10857931	Slc6a1	Slc6a1	solute carrier family 6 (neurotransmitter transporter, GABA), member 1	2384.35	24		2570.39	2363.02	2313.63	2405.8	117.175	154.575	80.5143	181.839	47.8367	63.1052	32.8698	74.2356	2570±48	2363±63	2314±33	2406±74	0.0259839	19050.8	204.846	-1	-1	0	0	0	0		-100
10895251	Slc6a15	Slc6a15	solute carrier family 6 (neutral amino acid transporter), member 15	1136.8	24	Down	1199.8	1126.12	1138.18	1119.09	42.4561	62.5447	16.4421	63.9946	17.3326	25.5338	6.71247	26.1257	1200±17	1126±26	1138±7	1119±26	0.0436405	2446.75	73.4117	-1	0	-1	0	0	0		-100
10702562	Slc6a18	Slc6a18	solute carrier family 6, member 18	84.4167	24		93.1792	78.7803	78.0192	87.2184	2.27035	7.83368	6.61114	6.80887	0.926869	3.19809	2.69899	2.77971	93±1	79±3	78±3	87±3	0.00119148	37.9778	9.14609	-1	-1	0	0	0	1		-100
10741189	Slc9a3r2	Slc9a3r2	solute carrier family 9 (sodium/hydrogen exchanger), member 3 regulator 2	473.988	24		510.027	463.704	464.674	459.597	21.5796	33.387	39.3654	15.1129	8.80985	13.6302	16.0708	6.1698	510±9	464±14	465±16	460±6	0.0217548	825.122	42.6314	-1	-1	-1	0	0	0		-100
10785782	Slitrk1	Slitrk1	SLIT and NTRK-like family, member 1	1656.94	24		1757.46	1616.3	1617.34	1650.81	85.4562	104.343	76.2451	38.9077	34.8873	42.598	31.1269	15.884	1757±35	1616±43	1617±31	1651±16	0.0190079	6142.08	116.313	-1	-1	0	0	0	0		-100
10904517	Slurp1	Slurp1	secreted Ly6/Plaur domain containing 1	153.396	24		175.544	139.602	142.349	155.113	10.9297	13.1302	19.6372	12.9477	4.46203	5.36038	8.01684	5.28588	176±4	140±5	142±8	155±5	0.00194896	213.327	21.6767	-1	-1	0	0	0	0		-100
10815888	Smc4	Smc4	structural maintenance of chromosomes 4	279.804	24		289.332	255.566	274.128	266.224	14.3694	14.1119	20.6511	10.0461	5.86627	5.76116	8.43077	4.10128	289±6	256±6	274±8	266±4	0.0118915	235.049	22.7536	-1	0	-1	0	0	0		-100
10933651	Sms	Sms	spermine synthase	522.173	24		553.624	509.719	518.387	518.739	33.3083	27.7669	15.0172	10.7956	13.598	11.3358	6.13073	4.40727	554±14	510±11	518±6	519±4	0.0225792	544.289	34.6247	-1	-1	-1	0	0	0		-100
10907659	Smug1	Smug1	single-strand-selective monofunctional uracil-DNA glycosylase 1	158.807	24		171.283	153.539	163.879	146.282	10.1811	14.9291	13.1144	8.82557	4.15643	6.09478	5.35393	3.60302	171±4	154±6	164±5	146±4	0.00886979	139.957	17.5577	-1	0	-1	0	0	-1		-100
10842465	Snai1	Snai1	snail homolog 1 (Drosophila)	51.8781	24		55.4608	48.3455	47.7362	54.2733	6.28159	1.69098	4.20349	3.29618	2.56445	0.690338	1.71607	1.34566	55±3	48±1	48±2	54±1	0.0104607	18.4947	6.38256	-1	-1	0	0	0	1		-100
10840245	Snap25	Snap25	synaptosomal-associated protein 25	11094.8	24		11410.1	10996.5	11230.9	11005.5	115.088	369.286	221.512	99.0568	46.9846	150.76	90.432	40.4398	11410±47	10997±151	11231±90	11005±40	0.012215	47690.2	324.105	-1	0	-1	0	0	0		-100
10849863	Snrpb	Snrpb	small nuclear ribonucleoprotein polypeptides B and B1	364.087	24		378.225	345.601	359.43	367.049	15.3052	17.9957	16.4258	20.3653	6.24833	7.34671	6.70582	8.31412	378±6	346±7	359±7	367±8	0.0423454	309.969	26.1294	-1	0	0	0	0	0		-100
10722489	Snrpn	Snrpn	small nuclear ribonucleoprotein polypeptide N	3926.4	24		4114.74	3810.22	3950.78	3924.37	89.5209	168.39	97.8429	71.8915	36.5468	68.7449	39.9442	29.3496	4115±37	3810±69	3951±40	3924±29	0.00182766	11957.8	162.292	-1	-1	-1	0	0	0		-100
10843606	Sohlh1	Sohlh1	spermatogenesis and oogenesis specific basic helix-loop-helix 1	73.4604	24		83.9317	69.9833	67.3964	72.5252	5.25898	5.47883	3.37852	3.58493	2.14697	2.23672	1.37927	1.46354	84±2	70±2	67±1	73±1	2.19309e-05	19.9835	6.63447	-1	-1	-1	0	0	0		-100
10791750	Sorbs2	Sorbs2	sorbin and SH3 domain containing 2	1453.34	24		1541.25	1447.17	1427.8	1436.8	56.1838	54.3208	57.0671	31.4189	22.9369	22.1764	23.2976	12.8267	1541±23	1447±22	1428±23	1437±13	0.00345341	2568.69	75.2188	-1	-1	-1	0	0	0		-100
10919532	Sox14	Sox14	SRY (sex determining region Y)-box 14	63.1297	24		66.6599	59.4856	61.2617	64.8287	2.76248	4.46675	5.29022	2.30259	1.12778	1.82354	2.15972	0.94003	67±1	59±2	61±2	65±1	0.0231645	14.9687	5.742	-1	0	0	0	0	0		-100
10836971	Sp9	Sp9	trans-acting transcription factor 9	164.337	24		180.059	151.707	152.284	174.383	20.2463	22.6823	9.39332	19.9293	8.26552	9.26001	3.83481	8.13609	180±8	152±9	152±4	174±8	0.0318455	343.924	27.5234	-1	-1	0	0	0	0		-100
10746370	Spata20	Spata20	spermatogenesis associated 20	130.124	24		140.823	121.715	126.545	130.583	6.2462	17.5698	8.54236	7.48161	2.55	7.17285	3.48741	3.05435	141±3	122±7	127±3	131±3	0.0385513	109.19	15.5082	-1	0	0	0	0	0		-100
10831880	Spdef	Spdef	SAM pointed domain containing ets transcription factor	105.586	24		120.867	99.1732	99.471	104.018	5.39341	7.40726	9.74411	5.56257	2.20185	3.024	3.97802	2.27091	121±2	99±3	99±4	104±2	0.000143286	52.3349	10.7366	-1	-1	-1	0	0	0		-100
10756761	Spdye4	Spdye4	speedy homolog E4 (Xenopus laevis)	130.441	24		144.029	122.817	123.578	132.723	13.7606	13.5862	12.6838	9.98401	5.61776	5.54655	5.17815	4.07595	144±6	123±6	124±5	133±4	0.0324334	157.259	18.6114	-1	-1	0	0	0	0		-100
10779253	Spetex-2F	Spetex-2F	Spetex-2F protein	133.085	24		147.867	122	119.108	144.996	13.1525	24.9895	15.4496	12.2154	5.36948	10.2019	6.30729	4.9869	148±5	122±10	119±6	145±5	0.0128872	279.072	24.793	-1	-1	0	0	0	1		-100
10721883	Sphk2	Sphk2	sphingosine kinase 2	548.154	24		598.444	525.219	525.209	551.277	36.794	50.0312	31.8596	60.4099	15.0211	20.4252	13.0066	24.6622	598±15	525±20	525±13	551±25	0.043159	2110.71	68.1844	-1	-1	0	0	0	0		-100
10777788	Spon2	Spon2	spondin 2, extracellular matrix protein	92.8732	24		98.0664	89.2906	93.616	90.017	4.42494	4.34155	5.47904	5.64306	1.80647	1.77243	2.23681	2.30377	98±2	89±2	94±2	90±2	0.0311643	25.4009	7.47989	-1	0	-1	0	0	0		-100
10804125	Spry4	Spry4	sprouty homolog 4 (Drosophila)	119.138	24		126.777	110.434	122.465	118.052	3.29188	11.7862	9.76975	8.23238	1.3439	4.8117	3.98848	3.36086	127±1	110±5	122±4	118±3	0.035144	75.0495	12.8572	-1	0	0	0	0	0		-100
10874019	Srm	Srm	spermidine synthase	1211.68	24		1250.58	1193.29	1234	1173.9	18.2839	34.0712	46.6248	32.914	7.46436	13.9095	19.0345	13.4371	1251±7	1193±14	1234±19	1174±13	0.00398486	1189.52	51.1867	-1	0	-1	0	0	-1		-100
10776340	Srp72	Srp72	signal recognition particle 72	1973.39	24		2059.2	1869.07	1959.64	1993.58	51.738	85.6933	93.0035	101.248	21.1219	34.9841	37.9685	41.3345	2059±21	1869±35	1960±38	1994±41	0.0126986	7224.31	126.145	-1	0	0	0	0	0		-100
10787520	Ssbp4	Ssbp4	single stranded DNA binding protein 4	1155.51	24		1218.26	1098.81	1140.35	1183.27	46.8604	71.5789	67.9182	52.7655	19.1307	29.222	27.7275	21.5414	1218±19	1099±29	1140±28	1183±22	0.0208809	3603.11	89.086	-1	0	0	0	0	0		-100
10936947	Ssx1	Ssx1	synovial sarcoma, X breakpoint 1	57.6276	24		62.8966	55.018	55.5147	56.7921	4.58576	6.3297	5.11892	3.45341	1.87213	2.58409	2.08979	1.40985	63±2	55±3	56±2	57±1	0.0460992	24.0028	7.27113	-1	-1	0	0	0	0		-100
10757264	Stag3	Stag3	stromal antigen 3	65.3446	24		70.3052	61.3286	65.7532	63.658	3.24007	5.57382	5.40817	2.6801	1.32275	2.2755	2.20788	1.09415	70±1	61±2	66±2	64±1	0.0171911	18.8903	6.45046	-1	0	-1	0	0	0		-100
10751437	Stfa2	Stfa2	stefin A2	57.3129	24		62.7413	54.8079	54.1981	58.1321	3.12492	2.91606	5.29395	4.2053	1.27574	1.19048	2.16124	1.7168	63±1	55±1	54±2	58±2	0.00701822	16.389	6.00824	-1	-1	0	0	0	0		-100
10828221	Stk19	Stk19	serine/threonine kinase 19	178.499	24		194.002	167.411	175.258	177.063	9.94483	13.68	14.051	5.23492	4.05996	5.58485	5.73628	2.13715	194±4	167±6	175±6	177±2	0.00590085	124.592	16.5659	-1	-1	-1	0	0	0		-100
10716880	Stx11	Stx11	syntaxin 11	60.0534	24		65.0012	55.3001	56.7827	61.718	5.97566	3.84888	3.43311	5.63103	2.43955	1.5713	1.40156	2.29886	65±2	55±2	57±1	62±2	0.0125101	23.9617	7.2649	-1	-1	0	0	0	0		-100
10822000	Sub1	Sub1	SUB1 homolog (S. cerevisiae)	2545.99	24		2631.43	2486.19	2537.5	2556.95	46.0174	38.831	127.425	69.4542	18.7865	15.8527	52.0209	28.3545	2631±19	2486±16	2538±52	2557±28	0.0491599	6417.06	118.888	-1	0	0	0	0	0		-100
10781451	Sucla2	Sucla2	succinate-CoA ligase, ADP-forming, beta subunit	1344.16	24		1393.05	1302.83	1358	1357.41	21.4463	53.2556	41.6194	56.0182	8.7554	21.7415	16.9911	22.8693	1393±9	1303±22	1358±17	1357±23	0.029059	1999.76	66.3682	-1	0	0	0	0	0		-100
10705550	Sycn	Sycn	syncollin	49.515	23		56.2195	47.2911	45.2465	49.8391	3.86844	3.92675	3.63155	2.99283	1.57928	1.60309	1.48258	1.22182	56±2	47±2	45±1	50±1	0.000299163	13.012	5.35356	-1	-1	-1	0	0	0		-100
10741203	Syngr3	Syngr3	synaptogyrin 3	1225.59	24		1379.63	1194.12	1230.83	1178.79	61.0377	94.9483	64.4993	51.5174	24.9185	38.7625	26.3317	21.0319	1380±25	1194±39	1231±26	1179±21	0.000253176	4671.57	101.438	-1	-1	-1	0	0	0		-100
10906364	Syt10	Syt10	synaptotagmin X	240.911	24		280.373	218.401	229.139	238.764	21.6436	32.8257	21.8217	16.7842	8.83595	13.4011	8.90866	6.85213	280±9	218±13	229±9	239±7	0.00146712	549.569	34.7922	-1	-1	-1	0	0	0		-100
10824349	Syt11	Syt11	synaptotagmin XI	4915.25	24		5071.72	4839.67	4906.62	4944.98	123.748	129.022	93.7051	102.463	50.5201	52.673	38.255	41.8305	5072±51	4840±53	4907±38	4945±42	0.0186397	12608	166.646	-1	0	0	0	0	0		-100
10803577	Syt4	Syt4	synaptotagmin IV	1036.33	24		1098.06	1012.31	1073.68	1017.61	41.3756	100.261	38.6321	17.5597	16.8915	40.9313	15.7715	7.1687	1098±17	1012±41	1074±16	1018±7	0.0409539	3040.66	81.8379	-1	0	0	0	0	0		-100
10712462	Syt8	Syt8	synaptotagmin VIII	87.6939	24		92.848	83.1439	84.4434	91.2138	1.36069	6.98704	9.40432	4.15216	0.5555	2.85245	3.8393	1.69511	93±1	83±3	84±4	91±2	0.0380987	38.5759	9.21783	-1	0	0	0	0	0		-100
10718075	T	T	brachyury homolog (mouse)	133.926	24		144.66	122.489	131.256	137.256	12.4448	17.7898	10.2566	6.51385	5.08058	7.26265	4.18722	2.65927	145±5	122±7	131±4	137±3	0.0425594	146.232	17.947	-1	0	0	0	0	0		-100
10717280	Taar7c	Taar7c	trace amine-associated receptor 7C	37.3055	6		42.2157	34.8089	35.2533	36.3008	4.31498	4.3663	4.65306	0.921285	1.76159	1.78254	1.8996	0.376113	42±2	35±2	35±2	36±0	0.0133246	14.8343	5.71617	-1	-1	-1	0	0	0		-100
10871071	Tal1	Tal1	T-cell acute lymphocytic leukemia 1	58.572	24		62.0694	55.5975	57.2328	56.3384	3.03749	4.72027	1.96512	4.89874	1.24005	1.92704	0.802258	1.9999	62±1	56±2	57±1	56±2	0.0384157	14.4501	5.64166	-1	0	-1	0	0	0		-100
10869149	Tal2	Tal2	T-cell acute lymphocytic leukemia 2	45.1176	23		49.2364	42.6024	43.0931	45.6465	4.90518	3.92926	1.89101	2.68987	2.00253	1.60411	0.772002	1.09814	49±2	43±2	43±1	46±1	0.0182662	12.4272	5.23188	-1	-1	0	0	0	0		-100
10778361	Tbrg4	Tbrg4	transforming growth factor beta regulator 4	465.243	24		499.011	459.778	458.916	451.782	16.9045	36.7138	18.3684	16.3566	6.90122	14.9884	7.49886	6.67756	499±7	460±15	459±7	452±7	0.00821018	518.163	33.7835	-1	-1	-1	0	0	0		-100
10817168	Tchh	Tchh	trichohyalin	212.576	24		233.407	203.681	198.802	217.676	15.638	15.5211	19.4881	23.217	6.38418	6.33645	7.956	9.4783	233±6	204±6	199±8	218±9	0.0234503	356.865	28.0364	-1	-1	0	0	0	0		-100
10806855	Tecr	Tecr	trans-2,3-enoyl-CoA reductase	6679.92	24		6942.71	6643.35	6743.69	6636.93	122.665	261.524	143.439	178.813	50.0777	106.767	58.5588	73.0002	6943±50	6643±107	6744±59	6637±73	0.0301303	32187.2	266.264	-1	0	-1	0	0	0		-100
10831523	Tesb	Tesb	testis specific basic protein	79.7285	24		90.4838	70.2486	74.9382	82.5491	8.24575	15.1379	6.10247	4.84116	3.36631	6.18002	2.49132	1.97639	90±3	70±6	75±2	83±2	0.00743565	82.1037	13.4478	-1	-1	0	0	0	0		-100
10939521	Tex13b	Tex13b	testis expressed 13B	68.1877	24		73.5517	62.8858	68.5816	67.6193	3.81128	5.50907	5.13262	4.81588	1.55595	2.24907	2.09539	1.96607	74±2	63±2	69±2	68±2	0.0148777	23.248	7.15588	-1	0	0	0	0	0		-100
10783880	Tgm1	Tgm1	transglutaminase 1 (K polypeptide epidermal type I, protein-glutamine-gamma-glutamyltransferase)	116.814	24		128.141	110.185	109.615	118.579	12.357	7.8656	4.89694	9.73176	5.04473	3.21112	1.99917	3.97297	128±5	110±3	110±2	119±4	0.00857155	84.4413	13.6379	-1	-1	0	0	0	0		-100
10728044	Tigd3	Tigd3	tigger transposable element derived 3	89.0737	24		95.7035	82.8339	85.9539	91.5084	8.00364	10.7789	5.15079	3.95795	3.26747	4.40046	2.1028	1.61583	96±3	83±4	86±2	92±2	0.0354325	52.4215	10.7455	-1	0	0	0	0	0		-100
10728123	Tm7sf2	Tm7sf2	transmembrane 7 superfamily member 2	182.575	24		192.595	180.602	186.672	176.346	3.77497	3.71767	5.76082	6.71951	1.54113	1.51773	2.35184	2.74323	193±2	181±2	187±2	176±3	0.000215371	27.2753	7.75096	-1	0	-1	0	0	-1		-100
10736720	Tmem132e	Tmem132e	transmembrane protein 132E	195.525	24		203.265	185.562	195.926	200.255	11.2696	9.19884	10.2693	8.99342	4.6008	3.75541	4.19242	3.67155	203±5	186±4	196±4	200±4	0.0473977	100.273	14.8615	-1	0	0	0	0	0		-100
10916640	Tmem136	Tmem136	transmembrane protein 136	174.172	24		189.101	164.763	168.686	176.393	8.91686	13.8573	12.4212	17.5321	3.64029	5.65721	5.07093	7.15746	189±4	165±6	169±5	176±7	0.0330103	182.84	20.0681	-1	-1	0	0	0	0		-100
10706994	Tmem143	Tmem143	transmembrane protein 143	305.497	24		325.996	299.943	312.444	297.641	2.26007	12.7446	15.46	8.53216	0.922669	5.20295	6.3115	3.48324	326±1	300±5	312±6	298±3	0.00215712	123.843	16.516	-1	0	-1	0	0	0		-100
10762902	Tmem211	Tmem211	transmembrane protein 211	74.6235	24		82.1966	69.8727	73.3681	74.6649	5.4315	8.95687	6.07075	4.51105	2.2174	3.65663	2.47837	1.84163	82±2	70±4	73±2	75±2	0.0264151	39.7066	9.35195	-1	0	0	0	0	0		-100
10919552	Tmem22	Tmem22	transmembrane protein 22	203.164	24		223.055	193.35	192.469	208.823	13.8759	10.917	12.4517	29.187	5.66481	4.45683	5.08339	11.9156	223±6	193±4	192±5	209±12	0.0330587	340.74	27.3957	-1	-1	0	0	0	0		-100
10903560	Tmem74	Tmem74	transmembrane protein 74	221.382	24		245.175	209.683	234.491	206.857	35.3263	9.66071	12.3824	18.6861	14.4219	3.94397	5.05511	7.62858	245±14	210±4	234±5	207±8	0.0185508	480.29	32.5254	-1	0	-1	0	0	0		-100
10909627	Tmprss13	Tmprss13	transmembrane protease, serine 13	58.3864	24		64.3184	52.3696	55.3327	61.7537	6.13172	6.28612	6.57081	9.67841	2.50326	2.5663	2.68252	3.9512	64±3	52±3	55±3	62±4	0.048604	54.2256	10.9288	-1	0	0	0	0	0		-100
10900363	Tmprss9	Tmprss9	transmembrane protease, serine 9	116.723	24		128.178	108.178	112.657	118.448	6.05413	5.84752	8.89613	8.38075	2.47159	2.38724	3.63183	3.42143	128±2	108±2	113±4	118±3	0.0016543	56.154	11.1214	-1	-1	0	0	0	0		-100
10850199	Tmx4	Tmx4	thioredoxin-related transmembrane protein 4	1046.06	24		1113.78	1014.65	1035.08	1060.89	49.5595	51.6268	42.2261	53.5018	20.2326	21.0766	17.2388	21.842	1114±20	1015±21	1035±17	1061±22	0.0180104	2429.97	73.1597	-1	-1	0	0	0	0		-100
10744171	Tnfsf12	Tnfsf12	tumor necrosis factor ligand superfamily member 12	269.039	24		286.899	257.839	253.499	269.628	23.0443	27.942	12.7258	10.4929	9.40778	11.4073	5.1953	4.28371	287±9	258±11	253±5	270±4	0.0361476	375.708	28.7671	-1	-1	0	0	0	0		-100
10744254	Tnk1	Tnk1	tyrosine kinase, non-receptor, 1	106.195	24		116.862	99.3884	103.405	105.865	9.12615	5.84552	10.2205	3.01457	3.72574	2.38642	4.17251	1.23069	117±4	99±2	103±4	106±1	0.00736005	58.992	11.399	-1	-1	0	0	0	0		-100
10704071	Tnnt1	Tnnt1	troponin T type 1 (skeletal, slow)	334.022	24		367.306	306.029	306.731	351.41	36.1495	35.5758	30.3564	25.3997	14.758	14.5238	12.393	10.3694	367±15	306±15	307±12	351±10	0.00687786	1022.62	47.46	-1	-1	0	0	0	0		-100
10779942	Tox4	Tox4	TOX high mobility group box family member 4	1069.69	24		1105.69	1030.13	1074.2	1059.88	25.6024	57.9297	20.8498	40.3392	10.4521	23.6497	8.51188	16.4684	1106±10	1030±24	1074±9	1060±16	0.0268694	1421.61	55.9579	-1	0	0	0	0	0		-100
10722097	Tph1	Tph1	tryptophan hydroxylase 1	99.1818	24		84.8965	74.3808	74.2321	79.8847	8.45878	5.8098	3.51308	3.446	3.45328	2.37184	1.43421	1.40682	85±3	74±2	74±1	80±1	0.02161	31.1741	8.28644	-1	-1	0	0	0	0		-100
10779868	Tppp2	Tppp2	tubulin polymerization-promoting protein family member 2	116.558	24		129.247	105.84	107.682	124.864	8.74313	13.3082	16.2349	15.7462	3.56937	5.43305	6.62788	6.42836	129±4	106±5	108±7	125±6	0.0196345	192.012	20.5653	-1	-1	0	0	0	0		-100
10755063	Tprg1	Tprg1	tumor protein p63 regulated 1	144.841	24		152.728	131.245	147.394	149.041	5.72239	16.4214	12.3804	12.8735	2.33616	6.70402	5.05426	5.2556	153±2	131±7	147±5	149±5	0.0475812	149.336	18.1365	-1	0	0	0	0	0		-100
10732411	Tpsg1	Tpsg1	tryptase gamma 1	64.1525	24		71.4755	58.2327	60.5522	62.5034	5.77354	8.61859	4.81368	1.64364	2.35704	3.51852	1.96518	0.671014	71±2	58±4	61±2	63±1	0.00561011	32.8029	8.50016	-1	-1	-1	0	0	0		-100
10902341	Trhde	Trhde	thyrotropin-releasing hormone degrading enzyme	680.187	24		735.52	641.753	706.42	670.122	14.149	97.7095	18.376	26.3226	5.77631	39.8898	7.50198	10.7461	736±6	642±40	706±8	670±11	0.0228677	2333.81	71.6974	-1	0	0	0	0	0		-100
10889263	Trib2	Trib2	tribbles homolog 2 (Drosophila)	283.23	24		311.219	270.09	287.148	270.591	10.7272	23.9289	21.139	15.5955	4.37936	9.76895	8.62996	6.36684	311±4	270±10	287±9	271±6	0.00322233	332.428	27.0595	-1	0	-1	0	0	0		-100
10737136	Trim37	Trim37	tripartite motif-containing 37	1836.32	24		1902.84	1817.14	1847.97	1837.63	26.6568	35.9558	37.6316	32.5372	10.8826	14.6789	15.363	13.2833	1903±11	1817±15	1848±15	1838±13	0.00252067	1110.43	49.4558	-1	-1	-1	0	0	0		-100
10888852	Trim54	Trim54	tripartite motif-containing 54	418.053	24		456.35	391.836	377.515	440.42	19.3395	50.0715	31.4535	46.4206	7.89531	20.4416	12.8408	18.9511	456±8	392±20	378±13	440±19	0.00563981	1453.67	56.5852	-1	-1	0	0	0	1		-100
10899073	Troap	Troap	trophinin associated protein	127.3	24		138.011	124.424	120.336	125.047	3.87817	10.8428	5.55836	6.9947	1.58326	4.42657	2.26919	2.85557	138±2	124±4	120±2	125±3	0.00225241	49.7145	10.4644	-1	-1	-1	0	0	0		-100
10709300	Trpc2	Trpc2	transient receptor potential cation channel, subfamily C, member 2	67.5017	24		71.1813	63.9068	70.031	65.1968	4.37146	3.85504	4.97231	4.2497	1.78464	1.57381	2.02994	1.73493	71±2	64±2	70±2	65±2	0.0301732	19.4165	6.53967	-1	0	0	0	0	0		-100
10862216	Trpv5	Trpv5	transient receptor potential cation channel, subfamily V, member 5	38.3416	8		41.9815	36.2914	37.915	37.1614	2.56538	5.00676	3.08982	1.79005	1.04731	2.044	1.26141	0.730786	42±1	36±2	38±1	37±1	0.0346759	10.3649	4.77808	-1	0	-1	0	0	0		-100
10727836	Tsga10ip	Tsga10ip	testis specific 10 interacting protein	152.692	24		167.442	145.546	143.62	155.929	7.68795	12.8221	7.45897	11.673	3.13859	5.2346	3.04511	4.76546	167±3	146±5	144±3	156±5	0.00236784	100.664	14.8905	-1	-1	0	0	0	0		-100
10859035	Tspan11	Tspan11	tetraspanin 11	172.876	24		185.363	165.651	166.087	172.67	9.8726	15.9614	13.976	8.18889	4.03047	6.51623	5.70567	3.3431	185±4	166±7	166±6	173±3	0.0423044	148.334	18.0755	-1	-1	0	0	0	0		-100
10830285	Tspyl4	Tspyl4	TSPY-like 4	2861.77	24		3014.09	2796.2	2893.89	2828.34	115.648	112.296	9.77055	37.7567	47.2132	45.8445	3.98881	15.4141	3014±47	2796±46	2894±4	2828±15	0.00168434	6934.64	123.59	-1	0	-1	0	0	0		-100
10755632	Tssk2	Tssk2	testis-specific serine kinase 2	1137.13	24		1183.02	1114.86	1090.66	1159.08	40.0878	22.1532	34.4583	47.533	16.3658	9.04402	14.0675	19.4053	1183±16	1115±9	1091±14	1159±19	0.00202361	1433.27	56.1868	-1	-1	0	0	0	1		-100
10870929	Ttc39a	Ttc39a	tetratricopeptide repeat domain 39A	255.687	24		273.552	244.705	241.046	263.451	10.5229	29.8828	14.0239	18.0273	4.29596	12.1996	5.72525	7.35963	274±4	245±12	241±6	263±7	0.0247924	354.414	27.94	-1	-1	0	0	0	0		-100
10846429	Ttn	Ttn	titin	78.8895	24		83.1302	75.2915	77.1215	80.2541	2.9435	4.38283	2.61702	3.70115	1.20168	1.78928	1.06839	1.51099	83±1	75±2	77±1	80±2	0.00576843	11.7313	5.08327	-1	-1	0	0	0	0		-100
10842032	Ttpal	Ttpal	tocopherol (alpha) transfer protein-like	218.511	24		233.621	213.773	213.198	212.419	4.72634	15.5822	12.3659	7.08667	1.92952	6.36139	5.04836	2.89312	234±2	214±6	213±5	212±3	0.00607297	110.452	15.5976	-1	-1	-1	0	0	0		-100
10756931	Ttyh3	Ttyh3	tweety homolog 3 (Drosophila)	1340.58	24		1435.26	1300.75	1336.72	1323.37	63.0925	99.4333	81.4713	26.562	25.7574	40.5935	33.2605	10.8439	1435±26	1301±41	1337±33	1323±11	0.0226289	5061.41	105.586	-1	0	-1	0	0	0		-100
10907086	Tuba1a	Tuba1a	tubulin, alpha 1A	7389.05	24		7667.6	7273.42	7226.23	7491.14	254.281	165.496	181.122	83.8805	103.81	67.5635	73.9429	34.2441	7668±104	7273±68	7226±74	7491±34	0.00185831	33266.1	270.69	-1	-1	0	0	0	0		-100
10745476	Tusc5	Tusc5	tumor suppressor candidate 5	71.0148	24		75.8841	65.2154	70.9573	72.0976	6.51227	3.0899	4.13281	5.70378	2.65862	1.26145	1.68721	2.32856	76±3	65±1	71±2	72±2	0.0227546	26.2265	7.60048	-1	0	0	0	0	0		-100
10925449	Twist2	Twist2	twist homolog 2 (Drosophila)	96.7533	24		105.322	86.9135	92.5843	97.7071	4.37278	5.98337	9.66991	9.76282	1.78518	2.4427	3.94772	3.98565	105±2	87±2	93±4	98±4	0.0069924	62.2583	11.7103	-1	-1	0	0	0	0		-100
10782804	Txndc16	Txndc16	thioredoxin domain containing 16	724.411	24		749.541	710.817	718.44	722.704	24.2974	21.909	16.0282	21.8316	9.91937	8.9443	6.54349	8.9127	750±10	711±9	718±7	723±9	0.0319398	449.444	31.4636	-1	0	0	0	0	0		-100
10718803	U2af2	U2af2	U2 small nuclear ribonucleoprotein auxiliary factor (U2AF) 2	801.938	24		824.739	772.489	791.615	807.061	35.5951	27.9945	23.7461	28.5716	14.5316	11.4287	9.69431	11.6643	825±15	772±11	792±10	807±12	0.0483681	861.626	43.5642	-1	0	0	0	0	0		-100
10936582	Uba1	Uba1	ubiquitin-like modifier activating enzyme 1	2131.06	24		2218.25	2102.12	2128.88	2104.73	66.0944	80.9729	37.1989	54.4435	26.9829	33.0571	15.1864	22.2265	2218±27	2102±33	2129±15	2105±22	0.0125285	3674.11	89.9595	-1	0	-1	0	0	0		-100
10864358	Uba3	Uba3	ubiquitin-like modifier activating enzyme 3	1286.74	24		1327.8	1237.8	1283.05	1295.59	36.1532	47.2548	55.5238	48.0118	14.7595	19.2917	22.6675	19.6007	1328±15	1238±19	1283±23	1296±20	0.0399106	2231.97	70.1157	-1	0	0	0	0	0		-100
10871519	Ubb	Ubb	ubiquitin B	11200.1	24		11356.8	11046.4	11207.8	11202.9	97.7916	208.787	164.752	102.16	39.9232	85.237	67.2599	41.7067	11357±40	11046±85	11208±67	11203±42	0.0216938	21583.4	218.037	-1	0	0	0	0	0		-100
10775136	Ube2d4	Ube2d4	ubiquitin-conjugating enzyme E2D 4 (putative)	147.228	24		162.706	134.591	142.869	150.124	8.714	17.7833	14.792	5.63733	3.55747	7.26001	6.0388	2.30143	163±4	135±7	143±6	150±2	0.00858488	152.503	18.3278	-1	-1	0	0	0	0		-100
10735483	Ube2g1	Ube2g1	ubiquitin-conjugating enzyme E2G 1	1115.7	24		1150.09	1075.34	1096.07	1126.49	41.3049	57.5098	28.0913	34.5432	16.8626	23.4783	11.4682	14.1022	1150±17	1075±23	1096±11	1126±14	0.0317887	1666.93	60.594	-1	0	0	0	0	0		-100
10752621	Ube2v2	Ube2v2	ubiquitin-conjugating enzyme E2 variant 2	486.603	24		508.735	459.03	472.817	505.797	30.957	43.7248	27.8034	28.3559	12.6381	17.8506	11.3507	11.5762	509±13	459±18	473±11	506±12	0.0496763	1069.71	48.5405	-1	0	0	0	0	0		-100
10881619	Ubiad1	Ubiad1	UbiA prenyltransferase domain containing 1	153.628	24		159.781	144.031	153.132	155.772	11.0211	4.92139	6.09193	9.14081	4.49935	2.00915	2.48702	3.73172	160±4	144±2	153±2	156±4	0.0365703	68.8176	12.3118	-1	0	0	0	0	0		-100
10867505	Ubxn2b	Ubxn2b	UBX domain protein 2B	594.784	24		621.797	581.293	596.971	585.092	25.8742	12.2801	13.58	34.5435	10.5631	5.01334	5.544	14.1023	622±11	581±5	597±6	585±14	0.0399352	570.468	35.4476	-1	0	-1	0	0	0		-100
10826607	Ugt8	Ugt8	UDP glycosyltransferase 8	775.35	24		847.896	692.542	786.567	771.166	22.6672	113.809	57.596	77.0083	9.25385	46.4624	23.5135	31.4385	848±9	693±46	787±24	771±31	0.0195846	5295.63	108.001	-1	0	0	0	0	0		-100
10819740	Uox	Uox	urate oxidase	39.4991	10		43.2941	36.2205	37.0733	41.1017	5.44046	2.1641	4.26573	2.9862	2.22106	0.883491	1.74148	1.21911	43±2	36±1	37±2	41±1	0.0230602	15.9103	5.91984	-1	-1	0	0	0	0		-100
10722053	Ush1c	Ush1c	Usher syndrome 1C homolog (human)	90.5823	24		96.5808	85.9735	90.8526	87.8118	3.48863	4.67561	4.60099	9.72771	1.42423	1.90881	1.87835	3.97132	97±1	86±2	91±2	88±4	0.0464236	38.2782	9.18219	-1	0	0	0	0	0		-100
10748932	Ush1g	Ush1g	Usher syndrome 1G homolog (human)	63.2499	24		69.4687	60.6989	60.1068	62.8615	2.86448	6.28391	6.32937	6.36191	1.16942	2.5654	2.58396	2.59724	69±1	61±3	60±3	63±3	0.0385276	31.6658	8.35153	-1	-1	0	0	0	0		-100
10803141	Usp14	Usp14	ubiquitin specific peptidase 14 (tRNA-guanine transglycosylase)	1281.88	24		1335.2	1253.71	1275.8	1292.21	42.7729	41.7502	39.6202	50.0884	17.462	17.0445	16.1749	20.4485	1335±17	1254±17	1276±16	1292±20	0.0362584	1921.74	65.0605	-1	0	0	0	0	0		-100
10734875	Vamp2	Vamp2	vesicle-associated membrane protein 2	4114.86	24		4262.36	4063.25	4105.85	4164.53	40.4385	115.021	92.7326	78.1506	16.509	46.957	37.8579	31.9048	4262±17	4063±47	4106±38	4165±32	0.00492992	7085.77	124.929	-1	-1	0	0	0	0		-100
10769919	Vangl2	Vangl2	vang-like 2 (van gogh, Drosophila)	171.308	24		184.89	156.837	169.341	168.902	13.2603	25.6299	4.91799	2.51962	5.4135	10.4634	2.00776	1.02863	185±5	157±10	169±2	169±1	0.0336375	202.949	21.1429	-1	0	0	0	0	0		-100
10843847	Vegp2	Vegp2	von Ebners gland protein 2	127.529	24		143.074	117.876	121.051	128.965	10.9914	16.6169	10.6816	6.37067	4.48723	6.7838	4.36073	2.60081	143±4	118±7	121±4	129±3	0.00663478	130.629	16.9625	-1	-1	0	0	0	0		-100
10901940	Vezt	Vezt	vezatin, adherens junctions transmembrane protein	557.302	24		581.153	545.231	575.741	537.821	17.2622	33.5656	11.6072	20.4419	7.04728	13.7031	4.73863	8.34536	581±7	545±14	576±5	538±8	0.00494165	461.027	31.8665	-1	0	-1	0	0	-1		-100
10701654	Vom2r6	Vom2r6	vomeronasal 2 receptor, 6	42.449	17		49.1258	39.9605	37.5105	44.3137	4.42113	5.6189	3.59912	1.88507	1.80492	2.29391	1.46934	0.769575	49±2	40±2	38±1	44±1	0.000466187	16.1345	5.96141	-1	-1	0	0	0	1		-100
10855846	Vopp1	Vopp1	vesicular, overexpressed in cancer, prosurvival protein 1	377.605	24		407.52	349.205	385.197	375.331	29.3823	38.9647	31.9941	18.6774	11.9953	15.9073	13.0615	7.62504	408±12	349±16	385±13	375±8	0.0352334	907.997	44.7212	-1	0	0	0	0	0		-100
10848801	Vps39	Vps39	vacuolar protein sorting 39 homolog (S. cerevisiae)	1216.16	24		1239.02	1200.28	1228.05	1203.66	13.6784	31.8749	30.6638	16.681	5.58418	13.0129	12.5185	6.81001	1239±6	1200±13	1228±13	1204±7	0.0370494	583.798	35.8593	-1	0	0	0	0	0		-100
10825120	Vps45	Vps45	vacuolar protein sorting 45 homolog (S. cerevisiae)	1020.04	24		1112.39	969.663	1034.15	976.165	55.4944	70.0978	36.9573	50.8374	22.6555	28.6173	15.0877	20.7543	1112±23	970±29	1034±15	976±21	0.000735998	2884.44	79.708	-1	0	-1	0	0	0		-100
10786836	Vstm4	Vstm4	V-set and transmembrane domain containing 4	269.497	24		283.249	259.811	259.871	271.771	8.75836	18.2825	12.5795	11.9272	3.57558	7.46379	5.13557	4.86926	283±4	260±7	260±5	272±5	0.017889	169.634	19.3298	-1	-1	0	0	0	0		-100
10925831	Wash2	Wash2	WAS protein family homolog 2	556.635	24		620.948	505.516	513.469	580.804	31.0352	71.1952	44.5437	56.8202	12.6701	29.0653	18.1849	23.1967	621±13	506±29	513±18	581±23	0.00326063	2692.33	77.0079	-1	-1	0	0	0	0		-100
10866488	Wbp11	Wbp11	WW domain binding protein 11	838.728	24		879.701	821.065	840.377	822.389	29.1392	38.0659	34.6653	35.3329	11.896	15.5403	14.1521	14.4246	880±12	821±16	840±14	822±14	0.0297183	1173.26	50.8356	-1	0	-1	0	0	0		-100
10898132	Wbp2nl	Wbp2nl	WBP2 N-terminal like	649.507	24		703.73	631.377	619.759	662.658	35.9322	43.2166	47.8005	39.06	14.6693	17.6431	19.5145	15.9462	704±15	631±18	620±20	663±16	0.012119	1735.75	61.8321	-1	-1	0	0	0	0		-100
10757704	Wbscr22	Wbscr22	Williams Beuren syndrome chromosome region 22	393.67	24		414.992	381.22	391.714	387.643	16.0166	17.7096	15.0493	12.8913	6.53874	7.2299	6.14386	5.26283	415±7	381±7	392±6	388±5	0.00829327	236.868	22.8415	-1	-1	-1	0	0	0		-100
10844103	Wdr34	Wdr34	WD repeat domain 34	187.166	24		194.92	179.108	182.548	192.953	11.2012	12.4752	9.05717	5.61377	4.57289	5.09297	3.69757	2.29181	195±5	179±5	183±4	193±2	0.0353965	95.6628	14.5158	-1	0	0	0	0	0		-100
10812566	Wdr41	Wdr41	WD repeat domain 41	659.097	24		686.776	646.034	658.546	649.385	12.8746	22.7937	15.8305	18.5528	5.25603	9.3055	6.46277	7.57414	687±5	646±9	659±6	649±8	0.00349623	309.529	26.1109	-1	-1	-1	0	0	0		-100
10818381	Wdr47	Wdr47	WD repeat domain 47	1412.22	24		1473.25	1382.69	1448.34	1388.33	37.36	78.4512	56.9994	51.5028	15.2522	32.0276	23.2699	21.0259	1473±15	1383±32	1448±23	1388±21	0.0340917	3216.03	84.1648	-1	0	-1	0	0	0		-100
10705937	Wdr62	Wdr62	WD repeat domain 62	120.846	24		132.004	114.342	115.134	121.316	9.66631	11.2014	7.75147	8.45544	3.94626	4.57296	3.16453	3.45192	132±4	114±5	115±3	121±3	0.015145	85.6303	13.7336	-1	-1	0	0	0	0		-100
10765963	Wdr64	Wdr64	WD repeat domain 64	51.0414	23		57.7507	46.8671	46.9484	51.8367	8.72144	6.17027	3.03859	4.20657	3.56051	2.519	1.2405	1.71732	58±4	47±3	47±1	52±2	0.0166749	35.1183	8.79504	-1	-1	0	0	0	0		-100
10802191	Wdr7	Wdr7	WD repeat domain 7	1394.8	24		1464.23	1361.4	1420.08	1392.4	27.7241	77.4337	19.4696	11.6299	11.3183	31.6122	7.94845	4.74788	1464±11	1361±32	1420±8	1392±5	0.00429968	1681.3	60.8546	-1	0	-1	0	0	0		-100
10808348	Wfdc1	Wfdc1	WAP four-disulfide core domain 1	322.38	24		346.166	309.641	307.135	319.395	22.2299	35.5411	16.9981	15.6996	9.07531	14.5096	6.93943	6.40934	346±9	310±15	307±7	319±6	0.0361071	536.872	34.3879	-1	-1	0	0	0	0		-100
10853954	Wnt16	Wnt16	wingless-type MMTV integration site family, member 16	113.085	24		121.271	105.379	109.612	115.058	8.84908	6.82063	9.8013	6.85336	3.61262	2.78451	4.00136	2.79787	121±4	105±3	110±4	115±3	0.0252345	68.0413	12.2421	-1	0	0	0	0	0		-100
10743123	Wnt3a	Wnt3a	wingless-type MMTV integration site family, member 3A	96.1788	24		104.172	90.1292	96.1694	95.6996	5.87159	8.69531	7.1868	5.20461	2.39707	3.54985	2.934	2.12477	104±2	90±4	96±3	96±2	0.0216522	45.7107	10.0341	-1	0	0	0	0	0		-100
10842052	Ywhab	Ywhab	tyrosine 3-monooxygenase/tryptophan 5-monooxygenase activation protein, beta polypeptide	6076.75	24		6291.4	6000.65	6086.74	6034.65	126.706	257.137	83.5827	168.85	51.7277	104.976	34.1225	68.9328	6291±52	6001±105	6087±34	6035±69	0.033473	27485.9	246.051	-1	0	-1	0	0	0		-100
10889360	Ywhaq	Ywhaq	tyrosine 3-monooxygenase/tryptophan 5-monooxygenase activation protein, theta polypeptide	5749.46	24		5893.05	5645.61	5732.64	5746.51	90.9363	170.725	69.3976	133.07	37.1246	69.6981	28.3315	54.3256	5893±37	5646±70	5733±28	5747±54	0.0202736	14239.7	177.101	-1	0	0	0	0	0		-100
10733477	Zcchc10	Zcchc10	zinc finger, CCHC domain containing 10	79.9319	24		83.5713	73.5185	80.0086	81.4112	5.72555	6.53813	5.25579	4.67394	2.33745	2.66918	2.14567	1.90813	84±2	74±3	80±2	81±2	0.0449125	30.6444	8.21573	-1	0	0	0	0	0		-100
10736647	Zfp207	Zfp207	zinc finger protein 207	2452.45	24		2518.3	2376.14	2465.37	2423.28	44.1952	113.574	83.9655	72.0199	18.0426	46.3664	34.2788	29.402	2518±18	2376±46	2465±34	2423±29	0.0490125	6449.87	119.192	-1	0	0	0	0	0		-100
10905141	Zfp251	Zfp251	zinc finger protein 251	335.503	24		361.596	319.112	327.466	332.528	15.7217	29.0414	21.9151	21.9335	6.41836	11.8561	8.94679	8.95433	362±6	319±12	327±9	333±9	0.024109	495.591	33.0394	-1	-1	0	0	0	0		-100
10705822	Zfp260	Zfp260	zinc finger protein 260	713.788	24		739.939	691.864	726.616	700.148	25.9096	35.6029	19.6409	35.5892	10.5775	14.5348	8.01835	14.5292	740±11	692±15	727±8	700±15	0.0451768	878.346	43.9849	-1	0	0	0	0	0		-100
10718436	Zfp40	Zfp40	zinc finger protein 40	823.879	24		873.869	786.666	811.881	824.535	35.6204	44.6178	43.4477	40.5881	14.542	18.2152	17.7374	16.57	874±15	787±18	812±18	825±17	0.0151824	1683.29	60.8906	-1	-1	0	0	0	0		-100
10703917	Zfp579	Zfp579	zinc finger protein 579	422.74	24		475.178	389.663	385.248	437.863	43.5737	56.9929	23.2679	38.3874	17.7889	23.2672	9.49906	15.6716	475±18	390±23	385±9	438±16	0.00412587	1713.74	61.4388	-1	-1	0	0	0	0		-100
10915716	Zfp653	Zfp653	zinc finger protein 653	174.773	24		189.635	166.922	172.972	171.436	13.2871	11.2832	11.9329	15.7776	5.42445	4.60634	4.87157	6.44117	190±5	167±5	173±5	171±6	0.0458105	176.242	19.7027	-1	0	0	0	0	0		-100
10757140	Zfp68	Zfp68	zinc finger protein 68	320.838	24		335.819	304.744	329.112	312.781	16.0193	26.3081	20.7972	11.4152	6.53984	10.7403	8.49043	4.66024	336±7	305±11	329±8	313±5	0.0480588	361.353	28.2122	-1	0	0	0	0	0		-100
10729027	Zfp91	Zfp91	zinc finger protein 91	2795.25	24		2874.72	2729.15	2792.76	2798.28	76.4634	106.224	39.4114	58.4422	31.2161	43.3658	16.0896	23.8589	2875±31	2729±43	2793±16	2798±24	0.028394	5221.65	107.244	-1	0	0	0	0	0		-100
10878617	Zyg11b	Zyg11b	zyg-11 homolog B (C. elegans)	1630.19	24		1702.3	1596.1	1627.57	1633.05	39.9094	74.9247	35.9951	32.2183	16.2929	30.5879	14.695	13.1531	1702±16	1596±31	1628±15	1633±13	0.00911034	2215.1	69.8502	-1	-1	0	0	0	0		-100

## Sheet: Aging up, Down by FK
ID	Gene	Gene	Description	Supermean	#P	stable aging	Yng	Vect	Short	Long	Yng	Vect	Short	Long	Yng	Vect	Short	Long	Young	Aging Ctrl	Short FK	Long FK	ANOVA	MSE	LSD	Y v Age Ctrl	Y v Short	Y v Long	Age Ctrl v Short FK	Age Ctrl v Long FK	Short v Long	Combo	Pattern#
10853300	Abcb1a	Abcb1a	ATP-binding cassette, sub-family B (MDR/TAP), member 1A	545.946	24		453.931	608.723	544.578	532.824	20.6625	55.4025	37.5672	27.599	8.43542	22.618	15.3367	11.2672	454±8	609±23	545±15	533±11	1.43089e-05	1330.39	54.1328	1	1	1	-1	-1	0	-1	1-1-1
10929063	Abcb6	Abcb6	ATP-binding cassette, subfamily B (MDR/TAP), member 6	297.161	24		297.245	319.652	299.673	282.141	13.1209	16.8106	11.555	8.20851	5.3566	6.86291	4.71732	3.35111	297±5	320±7	300±5	282±3	0.00108075	157.667	18.6355	1	0	0	-1	-1	0	-1	1-1-1
10740293	Abcc1	Abcc1	ATP-binding cassette, subfamily C (CFTR/MRP), member 1	446.418	24		435.553	477.542	427.146	452.147	18.3867	32.1515	23.4051	29.6266	7.50632	13.1258	9.5551	12.095	436±8	478±13	427±10	452±12	0.025103	681.732	38.7505	1	0	0	-1	0	0	-1	1-10
10785826	Abcc4	Abcc4	ATP-binding cassette, subfamily C (CFTR/MRP), member 4	267.687	24		245.544	293.252	254.526	277.671	9.21113	34.6771	12.6133	16.7002	3.76043	14.1569	5.14938	6.81782	246±4	293±14	255±5	278±7	0.00290178	390.747	29.3372	1	0	1	-1	0	0	-1	1-10
10866724	Abcc9	Abcc9	ATP-binding cassette, subfamily C (CFTR/MRP), member 9	148.678	24		135.853	166.714	140.436	137.593	5.12002	27.2349	7.38275	9.46035	2.09024	11.1186	3.014	3.86217	136±2	167±11	140±3	138±4	0.00697693	200.95	21.0385	1	0	0	-1	-1	0	-1	1-1-1
10935949	Abcd1	Abcd1	ATP-binding cassette, subfamily D (ALD), member 1	121.191	24		112.448	131.83	119.711	113.957	4.19381	16.4923	8.85896	11.4347	1.71212	6.73295	3.61666	4.66821	112±2	132±7	120±4	114±5	0.0349064	116.952	16.05	1	0	0	0	-1	0	-1	10-1
10775283	Abcg3l4	Abcg3l4	ATP-binding cassette, subfamily G (WHITE), member 3-like 4	129.902	24		113.877	134.19	127.702	124.503	5.39497	4.34202	3.0805	9.26484	2.20249	1.77262	1.25761	3.78235	114±2	134±2	128±1	125±4	0.000211578	36.7144	8.99268	1	1	1	0	-1	0	-1	10-1
10847600	Accs	Accs	1-aminocyclopropane-1-carboxylate synthase homolog (Arabidopsis)(non-functional)	81.809	24		80.188	88.8592	81.3436	79.0826	4.36256	7.31327	2.9204	6.77078	1.78101	2.98563	1.19225	2.76416	80±2	89±3	81±1	79±3	0.0403486	30.5767	8.20665	1	0	0	0	-1	0	-1	10-1
10869808	Acer2	Acer2	alkaline ceramidase 2	291.588	24		218.366	389.857	259.846	269.424	39.8605	171.823	29.7784	18.5661	16.273	70.1464	12.157	7.57958	218±16	390±70	260±12	269±8	0.0205552	6957.57	123.794	1	0	0	-1	0	0	-1	1-10
10783621	Acin1	Acin1	apoptotic chromatin condensation inducer 1	548.345	24		529.098	580.598	546.386	533.234	17.2828	16.182	14.6684	14.517	7.05567	6.60628	5.98834	5.92655	529±7	581±7	546±6	533±6	0.000138871	245.812	23.2687	1	0	0	-1	-1	0	-1	1-1-1
10709875	Adm	Adm	adrenomedullin	91.6391	24		82.8568	104.768	80.2718	85.291	5.1592	19.1365	6.65302	6.05088	2.10623	7.81245	2.71609	2.47026	83±2	105±8	80±3	85±2	0.00403665	105.384	15.2355	1	0	0	-1	-1	0	-1	1-1-1
10825736	Adora3	Adora3	adenosine A3 receptor	173.726	24		149.057	183.695	170.246	160.006	5.27696	27.888	11.3678	6.75336	2.15431	11.3852	4.6409	2.75705	149±2	184±11	170±5	160±3	0.0067889	217.072	21.8662	1	0	0	0	-1	0	-1	10-1
10931620	Adrbk2	Adrbk2	adrenergic, beta, receptor kinase 2	423.599	24		396.889	469.369	447.056	403.484	21.4897	65.4454	22.093	23.0048	8.77313	26.718	9.01941	9.39165	397±9	469±27	447±9	403±9	0.00860764	1290.95	53.3243	1	0	0	0	-1	0	-1	10-1
10777450	Afap1	Afap1	actin filament associated protein 1	307.666	24		288.519	326.023	318.808	300.546	8.87078	14.9006	10.6181	12.9803	3.62148	6.08315	4.33481	5.2992	289±4	326±6	319±4	301±5	0.000149381	141.46	17.6517	1	1	0	0	-1	-1	-1	10-1
10775407	Aff1	Aff1	AF4/FMR2 family, member 1	368.637	24		325.113	399.035	383.586	355.71	13.499	37.3781	10.7157	24.7183	5.51094	15.2595	4.37465	10.0912	325±6	399±15	384±4	356±10	0.000185957	533.09	34.2666	1	1	0	0	-1	0	-1	10-1
10733367	Agxt2l2	Agxt2l2	alanine-glyoxylate aminotransferase 2-like 2	215.667	24		212.156	228.846	217.569	207.102	11.5416	12.752	4.84117	13.0274	4.71183	5.20599	1.9764	5.31841	212±5	229±5	218±2	207±5	0.0252087	120.118	16.2658	1	0	0	0	-1	0	-1	10-1
10713796	Ahnak	Ahnak	AHNAK nucleoprotein	204.325	24		187.552	218.364	191.366	192.196	16.6198	27.1328	12.488	11.1768	6.785	11.0769	5.09821	4.56292	188±7	218±11	191±5	192±5	0.0366147	301.59	25.7738	1	0	0	-1	-1	0	-1	1-1-1
10900988	Akap8l	Akap8l	A kinase (PRKA) anchor protein 8-like	907.522	24		883.671	977.367	893.977	904.598	21.5489	25.2302	51.4104	44.8577	8.79732	10.3002	20.9882	18.3131	884±9	977±10	894±21	905±18	0.00350889	1481.28	57.1201	1	0	0	-1	-1	0	-1	1-1-1
10709788	Akip1	Akip1	A kinase (PRKA) interacting protein 1	377.636	24		360.507	394.741	368.689	381.719	17.098	14.4349	14.1756	15.3637	6.98024	5.89302	5.78718	6.27222	361±7	395±6	369±6	382±6	0.00832089	235.797	22.7898	1	0	0	-1	0	0	-1	1-10
10799357	Akr1cl1	Akr1cl1	aldo-keto reductase family 1, member C-like 1	145.943	24		141.384	154.95	144.216	140.285	7.42124	12.3572	6.75016	4.91647	3.02971	5.04481	2.75574	2.00714	141±3	155±5	144±3	140±2	0.0315096	64.9925	11.9647	1	0	0	0	-1	0	-1	10-1
10708760	Alg8	Alg8	asparagine-linked glycosylation 8, alpha-1,3-glucosyltransferase homolog (S. cerevisiae)	198.661	24		196.498	212.89	197.06	186.574	9.04371	11.3233	3.7387	1.70998	3.69208	4.6227	1.52632	0.698098	196±4	213±5	197±2	187±1	0.000297865	55.7441	11.0808	1	0	0	-1	-1	0	-1	1-1-1
10789291	Angpt2	Angpt2	angiopoietin 2	96.6533	24		62.6984	137.764	67.5596	69.7445	4.26799	71.9246	2.5418	13.6727	1.7424	29.3631	1.03769	5.58185	63±2	138±29	68±1	70±6	0.00543083	1144.77	50.2146	1	0	0	-1	-1	0	-1	1-1-1
10790276	Ankrd28	Ankrd28	ankyrin repeat domain 28	1318.88	24		1249.65	1358.04	1321.36	1275.27	16.4948	66.7979	39.5034	51.2924	6.73399	27.2701	16.1272	20.94	1250±7	1358±27	1321±16	1275±21	0.00450531	2113.97	68.237	1	1	0	0	-1	0	-1	10-1
10729269	Anxa1	Anxa1	annexin A1	172.236	24		164.725	177.293	157.259	163.755	3.26854	10.1085	7.58135	8.52256	1.33438	4.12676	3.09507	3.47932	165±1	177±4	157±3	164±3	0.00353298	58.5629	11.3575	1	0	0	-1	-1	0	-1	1-1-1
10911287	Anxa2	Anxa2	annexin A2	171.755	24		125.569	223.908	123.562	152.821	11.2404	91.8398	11.4228	39.8626	4.58889	37.4934	4.66336	16.2738	126±5	224±37	124±5	153±16	0.00905303	2261.45	70.5771	1	0	0	-1	-1	0	-1	1-1-1
10779115	Anxa7	Anxa7	annexin A7	259.866	24		242.825	275.243	266.486	250.726	10.4147	20.3498	10.0709	12.0004	4.25178	8.30776	4.11142	4.89916	243±4	275±8	266±4	251±5	0.00287157	180.313	19.9289	1	1	0	0	-1	0	-1	10-1
10802187	Apcdd1	Apcdd1	adenomatosis polyposis coli down-regulated 1	80.8667	24		76.085	88.4616	83.334	73.2673	6.33241	10.6633	3.45025	7.61164	2.5852	4.35327	1.40856	3.10744	76±3	88±4	83±1	73±3	0.0103126	52.8698	10.7913	1	0	0	0	-1	0	-1	10-1
10863831	Aplf	Aplf	aprataxin and PNKP like factor	179.366	24		176.186	190.501	178.274	170.277	7.73616	13.6306	7.13883	9.45979	3.15827	5.56468	2.91442	3.86194	176±3	191±6	178±3	170±4	0.0193798	91.8248	14.2217	1	0	0	0	-1	0	-1	10-1
10725519	Arhgap17	Arhgap17	Rho GTPase activating protein 17	351.69	24		302.282	381.656	335.762	332.979	11.2125	32.3692	12.682	22.5052	4.57747	13.2147	5.17742	9.18771	302±5	382±13	336±5	333±9	6.13766e-05	429.276	30.7496	1	1	0	-1	-1	0	-1	1-1-1
10818715	Arhgap29	Arhgap29	Rho GTPase activating protein 29	177.544	24		158.978	195.63	174.869	167.899	9.42824	19.815	11.2292	15.8917	3.84906	8.08946	4.58432	6.48778	159±4	196±8	175±5	168±6	0.00366794	205.696	21.2855	1	0	0	0	-1	0	-1	10-1
10816311	Arhgef11	Arhgef11	Rho guanine nucleotide exchange factor (GEF) 11	445.631	24		430.149	475.605	455.758	437.267	8.88199	22.5492	15.5643	9.23994	3.62606	9.20567	6.35411	3.77219	430±4	476±9	456±6	437±4	0.000266006	214.023	21.7121	1	1	0	0	-1	0	-1	10-1
10857430	Arl6ip5	Arl6ip5	ADP-ribosylation-like factor 6 interacting protein 5	1492.58	24		1440.44	1543.66	1525.7	1470.35	41.8561	68.3218	15.5429	25.7509	17.0877	27.8922	6.34537	10.5128	1440±17	1544±28	1526±6	1470±11	0.00143979	1681.82	60.864	1	1	0	0	-1	0	-1	10-1
10711357	Armc5	Armc5	armadillo repeat containing 5	269.185	24		257.286	290.475	269.622	256.845	9.92143	26.4929	16.0619	9.4612	4.05041	10.8157	6.55723	3.86252	257±4	290±11	270±7	257±4	0.0101168	265.113	24.165	1	0	0	0	-1	0	-1	10-1
10786235	Asb14	Asb14	ankyrin repeat and SOCS box-containing 14	202.008	24		170.485	253.131	174.494	217.689	24.501	75.0203	18.2741	30.9259	10.0025	30.6269	7.46036	12.6255	170±10	253±31	174±7	218±13	0.0103859	1682.39	60.8744	1	0	0	-1	0	0	-1	1-10
10839511	Ascc3l1	Ascc3l1	activating signal cointegrator 1 complex subunit 3-like 1	1100.06	24		1081.39	1124.51	1126.94	1070.18	16.6845	30.9599	23.5262	37.4606	6.81143	12.6393	9.60453	15.2932	1081±7	1125±13	1127±10	1070±15	0.00396832	789.991	41.714	1	1	0	0	-1	-1	-1	10-1
10806566	Asna1	Asna1	arsA arsenite transporter, ATP-binding, homolog 1 (bacterial)	1157.67	24		1135.27	1213.57	1185.88	1125.01	36.414	29.2863	33.6517	19.5231	14.866	11.9561	13.7382	7.97029	1135±15	1214±12	1186±14	1125±8	0.000273268	927.821	45.2067	1	1	0	0	-1	-1	-1	10-1
10776608	Atp10d	Atp10d	ATPase, class V, type 10D	95.5219	24		86.9157	102.386	90.7522	92.9981	3.72624	9.06283	3.80796	4.93014	1.52123	3.69988	1.55459	2.01272	87±2	102±4	91±2	93±2	0.00175652	31.1578	8.28426	1	0	0	-1	-1	0	-1	1-1-1
10935899	Atp2b3	Atp2b3	ATPase, Ca++ transporting, plasma membrane 3	1379.51	24		1307.51	1535.9	1362.34	1418.13	59.74	203.024	52.7028	89.1499	24.3887	82.8843	21.5158	36.3953	1308±24	1536±83	1362±22	1418±36	0.020579	12439.3	165.527	1	0	0	-1	0	0	-1	1-10
10770996	Atp5i	Atp5i	ATP synthase, H+ transporting, mitochondrial Fo complex, subunit E	496.234	24		459.487	545.527	501.489	502.766	13.8631	45.0649	24.5581	20.9785	5.65957	18.3977	10.0258	8.56444	459±6	546±18	501±10	503±9	0.000652326	752.648	40.7162	1	1	1	-1	-1	0	-1	1-1-1
10756546	Atp5j2	Atp5j2	ATP synthase, H+ transporting, mitochondrial Fo complex, subunit F2	2325.16	24		2226.68	2506.41	2331.06	2306.66	67.9833	170.004	68.1242	76.4042	27.7541	69.4036	27.8116	31.1919	2227±28	2506±69	2331±28	2307±31	0.00180889	10058.2	148.844	1	0	0	-1	-1	0	-1	1-1-1
10753198	Atp5o	Atp5o	ATP synthase, H+ transporting, mitochondrial F1 complex, O subunit	934.189	24		879.154	1012.03	946.646	933.849	44.3456	80.8173	14.5053	35.3959	18.104	32.9935	5.92176	14.4503	879±18	1012±33	947±6	934±14	0.00213172	2277.62	70.829	1	0	0	0	-1	0	-1	10-1
10934585	Atp7a	Atp7a	ATPase, Cu++ transporting, alpha polypeptide	201.248	24		184.477	214.116	195.522	197.686	5.25777	16.2791	9.84855	10.9774	2.14648	6.64592	4.02066	4.48149	184±2	214±7	196±4	198±4	0.00283432	120.302	16.2782	1	0	0	-1	-1	0	-1	1-1-1
10805425	Atp9b	Atp9b	ATPase, class II, type 9B	522.833	24		510.715	548.801	526.516	505.966	18.7994	36.4646	13.2462	15.2376	7.67484	14.8866	5.40772	6.22071	511±8	549±15	527±5	506±6	0.0197526	480.209	32.5227	1	0	0	0	-1	0	-1	10-1
10839232	B2m	B2m	beta-2 microglobulin	3580.37	24	Up	2848.89	3832.39	3412.41	3602.76	127.945	356.978	48.6448	283.269	52.2335	145.736	19.8592	115.644	2849±52	3832±146	3412±20	3603±116	1.19117e-05	55680.9	350.206	1	1	1	-1	0	0	-1	1-10
10876045	B4galt1	B4galt1	UDP-Gal:betaGlcNAc beta 1,4- galactosyltransferase, polypeptide 1	58.9217	23		50.9879	68.2551	51.5639	57.2775	6.5907	13.5861	5.30638	7.03142	2.69064	5.5465	2.16632	2.87056	51±3	68±6	52±2	57±3	0.0116167	70.7109	12.48	1	0	0	-1	0	0	-1	1-10
10892980	Baz2a	Baz2a	bromodomain adjacent to zinc finger domain, 2A	417.595	24		396.826	441.334	430.486	407.75	14.9285	14.489	18.2806	20.607	6.09451	5.91511	7.46302	8.41276	397±6	441±6	430±7	408±8	0.00146067	302.534	25.8142	1	1	0	0	-1	0	-1	10-1
10811185	Bcar1	Bcar1	breast cancer anti-estrogen resistance 1	361.521	24		346.637	387.808	351.902	370.033	17.4748	32.2295	10.6835	21.0302	7.13405	13.1576	4.36152	8.58552	347±7	388±13	352±4	370±9	0.0181419	445.464	31.324	1	0	0	-1	0	0	-1	1-10
10819192	Bdh2	Bdh2	3-hydroxybutyrate dehydrogenase, type 2	66.4839	24		61.0028	74.1149	60.5764	69.6917	5.83976	12.8566	4.89436	9.38425	2.38407	5.2487	1.99812	3.8311	61±2	74±5	61±2	70±4	0.0406024	73.2516	12.7022	1	0	0	-1	0	0	-1	1-10
10935890	Bgn	Bgn	biglycan	443.353	24		402.761	490.978	400.139	432.059	30.9553	59.0751	41.3871	67.3545	12.6374	24.1173	16.8962	27.4974	403±13	491±24	400±17	432±27	0.0327184	2631.48	76.1327	1	0	0	-1	0	0	-1	1-10
10888460	Birc6	Birc6	baculoviral IAP repeat-containing 6	1140.21	24		1110.43	1171.79	1164.51	1117.58	33.2515	38.4572	19.4827	41.2691	13.5749	15.7001	7.95378	16.848	1110±14	1172±16	1165±8	1118±17	0.0109036	1150.4	50.338	1	1	0	0	-1	0	-1	10-1
10911296	Bnip2	Bnip2	BCL2/adenovirus E1B interacting protein 2	500.042	24		478.138	513.672	482.654	497.92	17.9684	26.5413	14.2519	23.2098	7.33556	10.8354	5.81831	9.47535	478±7	514±11	483±6	498±9	0.0429147	428.48	30.7211	1	0	0	-1	0	0	-1	1-10
10713671	Bscl2	Bscl2	Berardinelli-Seip congenital lipodystrophy 2 (seipin)	446.189	24		438.126	471.547	452.42	430.939	14.2092	38.757	9.08449	14.5988	5.80089	15.8225	3.70873	5.95993	438±6	472±16	452±4	431±6	0.0254624	447.168	31.3838	1	0	0	0	-1	0	-1	10-1
10842879	Bwk1	Bwk1	Bwk1 leukemia-related gene	496.229	24		473.692	526.376	501.881	489.415	17.1411	33.4598	16.764	13.9673	6.99782	13.6599	6.84388	5.70215	474±7	526±14	502±7	489±6	0.00427785	438.312	31.0715	1	0	0	0	-1	0	-1	10-1
10858655	C1r	C1r	complement component 1, r subcomponent	381.694	24		309.964	423.59	367.464	380.564	8.94231	36.7906	18.4193	29.9743	3.65068	15.0197	7.51963	12.237	310±4	424±15	367±8	381±12	5.39551e-06	631.719	37.3021	1	1	1	-1	-1	0	-1	1-1-1
10854446	Cald1	Cald1	caldesmon 1	230.335	24		206.429	253.471	218.019	230.23	4.37622	29.2984	12.7983	27.3741	1.78659	11.961	5.2249	11.1754	206±2	253±12	218±5	230±11	0.00907887	426.055	30.634	1	0	0	-1	0	0	-1	1-10
10864623	Camk1	Camk1	calcium/calmodulin-dependent protein kinase I	237.265	24		231.149	261.736	237.754	226.204	10.0942	26.8641	13.8438	9.77215	4.12095	10.9672	5.65172	3.98946	231±4	262±11	238±6	226±4	0.00892502	254.312	23.6676	1	0	0	-1	-1	0	-1	1-1-1
10728093	Capn1	Capn1	calpain 1, (mu/I) large subunit	195.537	24		191.5	205.849	197.692	186.428	8.58091	8.79928	10.357	5.61925	3.50314	3.59229	4.22825	2.29405	191±4	206±4	198±4	186±2	0.00802952	72.2154	12.612	1	0	0	0	-1	0	-1	10-1
10911145	Car12	Car12	carbonic anyhydrase 12	561.554	24		477.364	767.233	480.537	583.356	37.9201	294.642	31.3214	165.684	15.4808	120.287	12.7869	67.6403	477±15	767±120	481±13	583±68	0.0282517	26137.3	239.939	1	0	0	-1	0	0	-1	1-10
10870809	Cc2d1b	Cc2d1b	coiled-coil and C2 domain containing 1B	224.087	24		216.839	235.789	218.287	225.681	9.77429	11.2869	10.1795	9.32726	3.99034	4.60784	4.15575	3.80784	217±4	236±5	218±4	226±4	0.0238655	102.124	14.998	1	0	0	-1	0	0	-1	1-10
10821623	Ccdc152	Ccdc152	coiled-coil domain containing 152	49.8001	23		44.3948	53.9893	51.2715	46.3046	3.36548	3.08792	6.99954	0.955825	1.37395	1.26064	2.85755	0.390214	44±1	54±1	51±3	46±0	0.006981	19.0775	6.48234	1	1	0	0	-1	0	-1	10-1
10889047	Ccdc164	Ccdc164	coiled-coil domain containing 164	235.422	24		225.84	276.993	211.761	241.415	20.7864	46.2209	15.7565	25.8018	8.48603	18.8696	6.43256	10.5335	226±8	277±19	212±6	241±11	0.00823843	803.991	42.082	1	0	0	-1	0	0	-1	1-10
10716995	Ccdc28a	Ccdc28a	coiled-coil domain containing 28A	467.556	24		461.512	509.027	457.46	454.913	35.5907	35.8798	20.1699	28.5587	14.5298	14.6479	8.23434	11.6591	462±15	509±15	457±8	455±12	0.0293143	926.056	45.1637	1	0	0	-1	-1	0	-1	1-1-1
10761792	Ccdc62	Ccdc62	coiled-coil domain containing 62	107.413	24		103.807	116.694	108.911	100.901	5.61742	7.45338	10.6874	9.23263	2.2933	3.04283	4.3631	3.7692	104±2	117±3	109±4	101±4	0.0336269	72.4892	12.6359	1	0	0	0	-1	0	-1	10-1
10839090	Ccndbp1	Ccndbp1	cyclin D-type binding-protein 1	211.567	24		203.606	225.384	217.591	204.142	5.44778	12.078	13.1914	5.87035	2.22405	4.93083	5.38537	2.39656	204±2	225±5	218±5	204±2	0.00285334	93.3829	14.3418	1	0	0	0	-1	0	-1	10-1
10825443	Cd101	Cd101	CD101 molecule	142.812	24		129.467	150.562	142.813	134.937	8.38452	14.7776	11.7329	4.8722	3.42297	6.03294	4.78993	1.98907	129±3	151±6	143±5	135±2	0.0169191	106.948	15.3482	1	0	0	0	-1	0	-1	10-1
10858626	Cd163	Cd163	CD163 molecule	74.4494	24		71.386	81.1899	67.5886	73.2227	4.45272	10.1397	1.23486	4.55181	1.81782	4.13952	0.50413	1.85827	71±2	81±4	68±1	73±2	0.00755376	32.7162	8.48892	1	0	0	-1	0	0	-1	1-10
10921951	Cd2ap	Cd2ap	CD2-associated protein	838.614	24		757.803	886.609	818.36	841.154	34.7752	71.0186	28.5034	40.166	14.1969	28.9932	11.6365	16.3977	758±14	887±29	818±12	841±16	0.00127304	2018.42	66.677	1	0	1	-1	0	0	-1	1-10
10770831	Cd46	Cd46	CD46 molecule, complement regulatory protein	131.045	24		128.126	142.937	127.622	126.127	5.17526	6.84985	7.34035	9.14933	2.11279	2.79644	2.99669	3.7352	128±2	143±3	128±3	126±4	0.00440042	53.1344	10.8183	1	0	0	-1	-1	0	-1	1-1-1
10826264	Cdc14a	Cdc14a	CDC14 cell division cycle 14 homolog A (S. cerevisiae)	214.576	24		204.488	226.422	202.763	210.36	6.22023	13.0285	11.6506	20.0624	2.5394	5.31885	4.75634	8.19045	204±3	226±5	203±5	210±8	0.0436557	187.558	20.3254	1	0	0	-1	0	0	-1	1-10
10915538	Cdc37	Cdc37	cell division cycle 37 homolog (S. cerevisiae)	621.754	24		590.184	655.618	645.637	610.581	26.3317	35.6983	26.4197	31.7489	10.7499	14.5738	10.7858	12.9614	590±11	656±15	646±11	611±13	0.00531103	899.696	44.5163	1	1	0	0	-1	0	-1	10-1
10913123	Cdhr4	Cdhr4	cadherin-related family member 4	207.835	24		205.528	258.234	171.45	208.475	18.7252	39.6459	26.8179	41.5683	7.64455	16.1854	10.9484	16.9702	206±8	258±16	171±11	208±17	0.00339195	1067.16	48.4825	1	0	0	-1	-1	0	-1	1-1-1
10808637	Cdk10	Cdk10	cyclin-dependent kinase 10	451.067	24		438.468	468.193	469.02	435.703	16.0679	14.9225	13.9445	25.4915	6.55971	6.09207	5.69283	10.4069	438±7	468±6	469±6	436±10	0.00597112	336.998	27.2448	1	1	0	0	-1	-1	-1	10-1
10820688	Cdk105	Cdk105	CDK105 protein	911.651	24		850.077	975.56	946.222	853.52	40.0995	73.9371	37.7013	60.0541	16.3706	30.1847	15.3915	24.517	850±16	976±30	946±15	854±25	0.00123948	2897.16	79.8835	1	1	0	0	-1	-1	-1	10-1
10895797	Cdk4	Cdk4	cyclin-dependent kinase 4	799.059	24		772.43	807.24	812.303	773.809	17.9442	23.9147	15.0619	18.2451	7.32567	9.76316	6.14898	7.44852	772±7	807±10	812±6	774±7	0.00170232	352.439	27.862	1	1	0	0	-1	-1	-1	10-1
10850903	Cdk5rap1	Cdk5rap1	CDK5 regulatory subunit associated protein 1	202.348	24		195.812	211.459	213.607	189.888	9.63067	8.07098	7.09442	6.24459	3.9317	3.29497	2.89629	2.54934	196±4	211±3	214±3	190±3	8.36384e-05	61.6284	11.651	1	1	0	0	-1	-1	-1	10-1
10860765	Cdk6	Cdk6	cyclin-dependent kinase 6	94.6003	24		80.6553	111.431	81.934	92.8036	7.91765	24.676	4.56385	17.9405	3.23237	10.074	1.86318	7.32419	81±3	111±10	82±2	93±7	0.0139124	234.87	22.7449	1	0	0	-1	0	0	-1	1-10
10719847	Ceacam1	Ceacam1	carcinoembryonic antigen-related cell adhesion molecule 1 (biliary glycoprotein)	159.267	24		146.823	172.855	166.966	151.559	5.5926	6.08159	12.2511	19.8401	2.28317	2.4828	5.0015	8.09968	147±2	173±2	167±5	152±8	0.00755819	159.101	18.7201	1	1	0	0	-1	0	-1	10-1
10826002	Celsr2	Celsr2	cadherin, EGF LAG seven-pass G-type receptor 2 (flamingo homolog, Drosophila)	1138.68	24		1073.39	1239.48	1193.87	1123.8	49.3498	112.264	48.0626	70.5663	20.147	45.8316	19.6215	28.8086	1073±20	1239±46	1194±20	1124±29	0.00549486	5212.52	107.151	1	1	0	0	-1	0	-1	10-1
10739282	Cep112	Cep112	centrosomal protein 112kDa	177.424	24		169.411	192.397	173.198	177.057	6.39114	15.9726	7.4215	15.2007	2.60917	6.52081	3.02982	6.20567	169±3	192±7	173±3	177±6	0.0261881	139.76	17.5454	1	0	0	-1	0	0	-1	1-10
10723032	Cib1	Cib1	calcium and integrin binding 1 (calmyrin)	162.014	24		145.292	172.762	163.618	156.189	6.6124	8.07082	7.26781	14.3528	2.6995	3.2949	2.96707	5.85951	145±3	173±3	164±3	156±6	0.00116817	93.3312	14.3379	1	1	0	0	-1	0	-1	10-1
10756054	Cldn5	Cldn5	claudin 5	276.133	24		231.732	327.358	266.387	263.265	15.97	57.668	8.36902	18.2733	6.51974	23.5428	3.41664	7.46004	232±7	327±24	266±3	263±7	0.000410912	873.545	43.8645	1	0	0	-1	-1	0	-1	1-1-1
10865956	Clec2d2	Clec2d2	C-type lectin domain family 2 member D2	163.744	24		136.596	181.269	145.891	154.004	17.5195	35.2895	9.78881	6.39178	7.15229	14.4069	3.99626	2.60943	137±7	181±14	146±4	154±3	0.00857424	378.918	28.8897	1	0	0	-1	0	0	-1	1-10
10859108	Clec2g	Clec2g	C-type lectin domain family 2, member G	306.741	24		221.028	369.977	276.657	278.466	12.6663	82.085	20.2858	20.5311	5.17101	33.5111	8.28166	8.38178	221±5	370±34	277±8	278±8	0.000114387	1679.96	60.8303	1	0	0	-1	-1	0	-1	1-1-1
10831090	Clic1	Clic1	chloride intracellular channel 1	151.316	24		105.051	166.615	139.701	129.408	2.5562	39.1767	19.4169	9.38876	1.04356	15.9938	7.92693	3.83295	105±1	167±16	140±8	129±4	0.00123251	447.251	31.3867	1	1	0	0	-1	0	-1	10-1
10827592	Clic2	Clic2	chloride intracellular channel 2	59.9013	24		57.2398	72.067	55.6446	56.308	3.48963	14.8163	5.88041	6.96859	1.42464	6.04873	2.40067	2.84491	57±1	72±6	56±2	56±3	0.0147618	71.299	12.5318	1	0	0	-1	-1	0	-1	1-1-1
10816688	Clk2	Clk2	CDC-like kinase 2	552.878	24		532.181	569.01	558.83	544.065	4.93808	16.1901	17.6676	18.6663	2.01596	6.60958	7.21277	7.62049	532±2	569±7	559±7	544±8	0.0040178	235.436	22.7723	1	1	0	0	-1	0	-1	10-1
10782144	Clybl	Clybl	citrate lyase beta like	234.319	24		211.914	266.595	219.226	247.25	11.1978	53.8785	6.92423	24.8419	4.57149	21.9958	2.8268	10.1417	212±5	267±22	219±3	247±10	0.0177437	819.149	42.4769	1	0	0	-1	0	0	-1	1-10
10920797	Cmc1	Cmc1	COX assembly mitochondrial protein homolog (S. cerevisiae)	39.6827	12		36.1826	42.611	36.6869	42.076	3.21616	3.64306	3.7764	2.35994	1.31299	1.48727	1.54171	0.963442	36±1	43±1	37±2	42±1	0.00400695	10.7347	4.86256	1	0	1	-1	0	1	-1	1-10
10805716	Cmtm4	Cmtm4	CKLF-like MARVEL transmembrane domain containing 4	421.158	24		418.596	444.735	430.482	410.16	14.6425	24.0412	13.0942	9.04893	5.97778	9.81479	5.3457	3.69421	419±6	445±10	430±5	410±4	0.00983621	244.771	23.2194	1	0	0	0	-1	0	-1	10-1
10914011	Cmtm6	Cmtm6	CKLF-like MARVEL transmembrane domain containing 6	158.722	24		143.208	175.034	151.179	149.972	11.6141	20.8233	12.7808	14.3918	4.74144	8.50107	5.21773	5.87541	143±5	175±9	151±5	150±6	0.0145916	224.275	22.226	1	0	0	-1	-1	0	-1	1-1-1
10922562	Cnnm3	Cnnm3	cyclin M3	230.237	24		217.828	252.707	224.262	227.437	12.313	17.1547	10.9466	9.40157	5.02678	7.00338	4.46892	3.83818	218±5	253±7	224±4	227±4	0.00129508	156.646	18.5751	1	0	0	-1	-1	0	-1	1-1-1
10800088	Colec12	Colec12	collectin sub-family member 12	185.931	24		168.286	204.814	180.714	186.488	10.4328	10.5899	14.1119	19.063	4.25916	4.32332	5.76117	7.78246	168±4	205±4	181±6	186±8	0.00395031	200.291	21.004	1	0	0	-1	0	0	-1	1-10
10791022	Cope	Cope	coatomer protein complex, subunit epsilon	501.603	24		487.961	524.778	511.686	488.976	13.6289	29.6926	17.6217	17.5694	5.56397	12.122	7.19404	7.17269	488±6	525±12	512±7	489±7	0.0152306	397.441	29.5874	1	0	0	0	-1	0	-1	10-1
10899633	Copz1	Copz1	coatomer protein complex, subunit zeta 1	859.983	24		837.176	901.003	878.039	832.146	26.6233	44.0121	28.3518	23.6522	10.8689	17.9679	11.5746	9.65599	837±11	901±18	878±12	832±10	0.00366465	953.08	45.8179	1	0	0	0	-1	-1	-1	10-1
10737763	Copz2	Copz2	coatomer protein complex, subunit zeta 2	168.579	24		154.783	195.335	151.932	175.534	8.27976	43.9577	10.2174	25.4142	3.3802	17.9457	4.17123	10.3753	155±3	195±18	152±4	176±10	0.0333711	622.278	37.0223	1	0	0	-1	0	0	-1	1-10
10814430	Cp	Cp	ceruloplasmin (ferroxidase)	232.112	24		135.406	295.819	184.984	195.173	7.11346	146.309	29.2547	30.7695	2.90406	59.7303	11.9432	12.5616	135±3	296±60	185±12	195±13	0.0115258	4994.27	104.883	1	0	0	-1	0	0	-1	1-10
10851134	Cpne1	Cpne1	copine I	607.191	24		592.43	628.468	611.505	597.458	20.7469	21.6694	16.2071	19.1162	8.4699	8.84649	6.61653	7.80415	592±8	628±9	612±7	597±8	0.0286715	377.417	28.8324	1	0	0	0	-1	0	-1	10-1
10712657	Cpt1a	Cpt1a	carnitine palmitoyltransferase 1a, liver	423.094	24		414.164	439.043	415.77	410.786	5.86827	23.9407	10.4122	21.1481	2.39571	9.77376	4.25076	8.63369	414±2	439±10	416±4	411±9	0.0485207	275.953	24.654	1	0	0	0	-1	0	-1	10-1
10920659	Crtap	Crtap	cartilage associated protein	147.619	24		126.983	164.342	131.555	150.223	8.9197	35.5953	6.40134	22.6997	3.64145	14.5317	2.61334	9.2671	127±4	164±15	132±3	150±9	0.0281341	434.062	30.9205	1	0	0	-1	0	0	-1	1-10
10816965	Crtc2	Crtc2	CREB regulated transcription coactivator 2	438.889	24		415.74	467.593	445.688	422.759	29.8094	16.5049	20.7597	31.7512	12.1696	6.73811	8.47509	12.9624	416±12	468±7	446±8	423±13	0.0150139	669.903	38.4129	1	0	0	0	-1	0	-1	10-1
10875091	Cspp1	Cspp1	centrosome and spindle pole associated protein 1	811.079	24		786.536	867.292	808.658	772.485	26.9183	46.3391	28.7236	24.5419	10.9893	18.9178	11.7264	10.0192	787±11	867±19	809±12	772±10	0.000601149	1018.37	47.3612	1	0	0	-1	-1	0	-1	1-1-1
10819726	Ctbs	Ctbs	chitobiase, di-N-acetyl-	209.015	24		193.355	221.353	203.138	205.216	11.3429	8.68085	8.97898	6.47698	4.63072	3.54394	3.66565	2.64421	193±5	221±4	203±4	205±3	0.000711935	81.979	13.4376	1	0	0	-1	-1	0	-1	1-1-1
10817419	Ctsk	Ctsk	cathepsin K	162.235	24		149.36	175.359	162.963	144.018	15.5661	14.3429	8.22014	8.92231	6.35482	5.85547	3.35586	3.64252	149±6	175±6	163±3	144±4	0.00170695	145.804	17.9207	1	0	0	0	-1	-1	-1	10-1
10792789	Cul4a	Cul4a	cullin 4A	554.794	24		549.879	571.639	555.474	545.048	9.73595	16.1736	9.7065	15.5601	3.97469	6.60286	3.96266	6.35237	550±4	572±7	555±4	545±6	0.0189893	168.524	19.2664	1	0	0	0	-1	0	-1	10-1
10764104	Cyb5r1	Cyb5r1	cytochrome b5 reductase 1	596.955	24		546.348	652.213	628.445	575.032	16.1153	93.6355	25.3215	19.2855	6.57903	38.2266	10.3375	7.87329	546±7	652±38	628±10	575±8	0.00460923	2180.76	69.3067	1	1	0	0	-1	0	-1	10-1
10905804	Cyb5r3	Cyb5r3	cytochrome b5 reductase 3	1494.7	24		1453.42	1571.4	1513.67	1439.81	47.1014	104.956	40.4125	50.2262	19.2291	42.8479	16.4984	20.5048	1453±19	1571±43	1514±16	1440±21	0.010316	3996.56	93.824	1	0	0	0	-1	0	-1	10-1
10713904	Cybasc3	Cybasc3	cytochrome b, ascorbate dependent 3	78.9076	24		70.349	84.238	79.5939	74.2264	4.75841	4.18673	5.01759	5.72287	1.94261	1.70923	2.04842	2.33635	70±2	84±2	80±2	74±2	0.00104702	24.8929	7.40471	1	1	0	0	-1	0	-1	10-1
10813361	Dab2	Dab2	disabled homolog 2 (Drosophila)	346.855	24		277.577	443.264	300.879	370.488	17.0015	143.208	7.69745	77.4425	6.94085	58.4646	3.14247	31.6158	278±7	443±58	301±3	370±32	0.00952444	5987.51	114.84	1	0	0	-1	0	0	-1	1-10
10814098	Dap	Dap	death-associated protein	274.225	24		220.408	325.098	246.369	267.237	18.6775	75.6422	17.7883	41.2053	7.62508	30.8808	7.26204	16.822	220±8	325±31	246±7	267±17	0.00535042	1826.46	63.4272	1	0	0	-1	0	0	-1	1-10
10900537	Dazap1	Dazap1	DAZ associated protein 1	844.8	24		816.066	893.695	861.005	811.938	46.2744	27.5328	31.2836	41.856	18.8914	11.2402	12.7715	17.0876	816±19	894±11	861±13	812±17	0.00559945	1441.67	56.3513	1	0	0	0	-1	0	-1	10-1
10895075	Dcn	Dcn	decorin	323.556	24	Down	257.047	462.061	260.756	321.495	16.9436	176.761	26.9658	126.5	6.91718	72.1625	11.0087	51.6432	257±7	462±72	261±11	321±52	0.0164849	11055.8	156.051	1	0	0	-1	0	0	-1	1-10
10831135	Ddx39b	Ddx39b	DEAD (Asp-Glu-Ala-Asp) box polypeptide 39B	1701.49	24		1659.08	1744.99	1705.59	1681.51	28.8019	32.1457	42.7046	34.1752	11.7583	13.1234	17.4341	13.952	1659±12	1745±13	1706±17	1682±14	0.0047244	1223.12	51.9045	1	0	0	0	-1	0	-1	10-1
10896966	Dennd3	Dennd3	DENN/MADD domain containing 3	145.847	24		133.72	154.033	143.731	139.663	9.14723	5.2163	9.19227	9.18352	3.73434	2.12955	3.75273	3.74916	134±4	154±2	144±4	140±4	0.00700305	72.1775	12.6087	1	0	0	0	-1	0	-1	10-1
10892706	Dnah11	Dnah11	dynein, axonemal, heavy chain 11	112.149	24		98.5725	137.296	94.441	118.101	7.40846	45.341	7.01029	23.6242	3.02449	18.5104	2.86194	9.64453	99±3	137±19	94±3	118±10	0.0363959	607.047	36.5664	1	0	0	-1	0	0	-1	1-10
10743989	Dnah2	Dnah2	dynein, axonemal, heavy chain 2	82.7882	24		83.2534	91.8333	78.3163	82.4261	5.69596	8.40672	4.04444	3.95173	2.32537	3.43203	1.65114	1.61329	83±2	92±3	78±2	82±2	0.00739152	31.8305	8.37322	1	0	0	-1	-1	0	-1	1-1-1
10908427	Dnm2	Dnm2	dynamin 2	1010.23	24		953.268	1033.26	1010.01	972.217	21.9867	54.0375	46.4027	22.765	8.97601	22.0607	18.9438	9.29378	953±9	1033±22	1010±19	972±9	0.00994263	1444.98	56.4159	1	1	0	0	-1	0	-1	10-1
10929161	Dnpep	Dnpep	aspartyl aminopeptidase	565.684	24		548.771	585.806	578.287	553.742	19.482	28.0812	19.937	15.9914	7.9535	11.4641	8.13926	6.52846	549±8	586±11	578±8	554±7	0.018995	437.79	31.053	1	0	0	0	-1	0	-1	10-1
10878221	Dock7	Dock7	dedicator of cytokinesis 7	699.28	24		680.938	718.997	684.322	690.99	24.1477	15.1969	28.1796	13.7729	9.85825	6.2041	11.5043	5.62277	681±10	719±6	684±12	691±6	0.0383772	460.961	31.8642	1	0	0	-1	0	0	-1	1-10
10830253	Dse	Dse	dermatan sulfate epimerase	108.903	24		92.3838	120.301	104.737	111.075	7.8114	11.4973	7.3021	9.95522	3.18899	4.69374	2.98107	4.0642	92±3	120±5	105±3	111±4	0.000606974	83.9986	13.6021	1	0	1	-1	0	0	-1	1-10
10735117	Dvl2	Dvl2	dishevelled 2	245.998	24		240.315	264.505	239.946	244.211	8.91568	19.1131	7.45694	18.7229	3.63981	7.80287	3.04428	7.64359	240±4	265±8	240±3	244±8	0.0361664	204.708	21.2343	1	0	0	-1	0	0	-1	1-10
10713789	Eef1g	Eef1g	eukaryotic translation elongation factor 1 gamma	2292.42	24		2170.61	2342.98	2297.99	2227.11	53.6228	87.3253	72.6535	77.5557	21.8914	35.6504	29.6607	31.662	2171±22	2343±36	2298±30	2227±32	0.00446072	5334.05	108.393	1	1	0	0	-1	0	-1	10-1
10713061	Efemp2	Efemp2	EGF-containing fibulin-like extracellular matrix protein 2	220.562	24		202.05	238.631	218.235	213.998	8.17554	6.28227	6.84801	8.06189	3.33765	2.56473	2.79569	3.29125	202±3	239±3	218±3	214±3	1.78474e-06	55.3427	11.0408	1	1	1	-1	-1	0	-1	1-1-1
10755279	Eif4g1	Eif4g1	eukaryotic translation initiation factor 4 gamma, 1	1232.65	24		1194.6	1288.8	1244.74	1203.54	51.557	77.1184	41.8604	23.6569	21.048	31.4835	17.0895	9.6579	1195±21	1289±31	1245±17	1204±10	0.0240958	2559.97	75.091	1	0	0	0	-1	0	-1	10-1
10873226	Eif4g3	Eif4g3	eukaryotic translation initiation factor 4 gamma, 3	1457.05	24		1421.42	1515.66	1475.84	1447.12	59.3796	30.9069	33.7854	39.6585	24.2416	12.6177	13.7929	16.1905	1421±24	1516±13	1476±14	1447±16	0.0114942	1843.26	63.7182	1	0	0	0	-1	0	-1	10-1
10939584	Elf4	Elf4	E74-like factor 4 (ets domain transcription factor)	57.4332	24		46.2373	59.9781	53.6331	51.7529	3.99574	9.22664	3.88206	4.02317	1.63125	3.76676	1.58484	1.64245	46±2	60±4	54±2	52±2	0.00555313	30.3492	8.17607	1	0	0	0	-1	0	-1	10-1
10915734	Elof1	Elof1	elongation factor 1 homolog (S. cerevisiae)	235.746	24		227.547	248.195	242.23	225.917	9.75505	11.0522	14.6487	11.3207	3.98248	4.51203	5.9803	4.62165	228±4	248±5	242±6	226±5	0.01233	140.954	17.6201	1	0	0	0	-1	0	-1	10-1
10819770	Eltd1	Eltd1	EGF, latrophilin and seven transmembrane domain containing 1	295.648	24		257.049	342.469	271.55	263.207	16.9242	67.4244	17.7917	21.2101	6.90927	27.5259	7.26343	8.659	257±7	342±28	272±7	263±9	0.00286594	1234.13	52.1376	1	0	0	-1	-1	0	-1	1-1-1
10721962	Emp3	Emp3	epithelial membrane protein 3	120.043	24		82.9772	128.887	111.857	104.056	5.88131	12.1088	16.9211	14.5207	2.40103	4.94338	6.90802	5.92807	83±2	129±5	112±7	104±6	0.000139099	170.806	19.3965	1	1	1	0	-1	0	-1	10-1
10770412	Enah	Enah	enabled homolog (Drosophila)	1233.33	24		1188.27	1326.06	1245.39	1220.98	65.7627	72.9185	32.4131	35.0286	26.8475	29.7689	13.2326	14.3004	1188±27	1326±30	1245±13	1221±14	0.00337078	2856.85	79.3258	1	0	0	-1	-1	0	-1	1-1-1
10876935	Epb41l4b	Epb41l4b	erythrocyte membrane protein band 4.1 like 4B	1232.77	24		1189.74	1285.07	1261.82	1234.61	29.5728	43.8227	28.1166	33.2274	12.0731	17.8906	11.4786	13.565	1190±12	1285±18	1262±11	1235±14	0.000968129	1133.03	49.9564	1	1	0	0	-1	0	-1	10-1
10923012	Ercc5	Ercc5	excision repair cross-complementing rodent repair deficiency, complementation group 5	292.984	24		279.242	310.754	301.461	278.621	16.5596	11.8675	13.4592	10.3907	6.76044	4.84488	5.4947	4.24198	279±7	311±5	301±5	279±4	0.00109185	177.897	19.795	1	1	0	0	-1	-1	-1	10-1
10753279	Erg	Erg	v-ets erythroblastosis virus E26 oncogene homolog (avian)	134.124	24		128.028	150.222	128.919	125.516	7.36421	10.5622	12.5324	6.93825	3.00643	4.31201	5.11632	2.83253	128±3	150±4	129±5	126±3	0.00167145	91.7578	14.2165	1	0	0	-1	-1	0	-1	1-1-1
10841452	Ergic3	Ergic3	ERGIC and golgi 3	776.76	24		740.69	820.843	757.438	789.596	32.7303	38.1628	11.8218	51.2018	13.3621	15.5799	4.82624	20.903	741±13	821±16	757±5	790±21	0.00831095	1315.2	53.8229	1	0	0	-1	0	0	-1	1-10
10909072	Esam	Esam	endothelial cell adhesion molecule	214.727	24		194.695	244.583	206.843	194.613	5.79392	35.6384	8.93649	11.1432	2.36536	14.5493	3.64831	4.54918	195±2	245±15	207±4	195±5	0.000675449	329.915	26.957	1	0	0	-1	-1	0	-1	1-1-1
10706339	Etfb	Etfb	electron-transfer-flavoprotein, beta polypeptide	644.684	24		607.576	680.81	665.556	630.063	13.9878	38.0204	25.0615	19.0022	5.71048	15.5218	10.2313	7.75763	608±6	681±16	666±10	630±8	0.000337958	616.121	36.8387	1	1	0	0	-1	0	-1	10-1
10908896	Ets1	Ets1	v-ets erythroblastosis virus E26 oncogene homolog 1 (avian)	152.784	24		139.009	154.434	141.981	148.244	4.30678	12.2787	5.78778	5.51336	1.75824	5.01277	2.36285	2.25082	139±2	154±5	142±2	148±2	0.0117221	53.4363	10.849	1	0	0	-1	0	0	-1	1-10
10713844	Fads3	Fads3	fatty acid desaturase 3	197.33	24		188.609	225.426	197.753	185.686	5.84962	22.174	8.82831	8.19684	2.3881	9.0525	3.60414	3.34635	189±2	225±9	198±4	186±3	0.000159434	150.709	18.2197	1	0	0	-1	-1	0	-1	1-1-1
10826137	Fam102b	Fam102b	family with sequence similarity 102, member B	702.348	24		643.674	725.729	704.615	650.58	30.7705	73.4151	31.3591	47.0918	12.562	29.9716	12.8023	19.2251	644±13	726±30	705±13	651±19	0.0216506	2226.23	70.0254	1	0	0	0	-1	0	-1	10-1
10832688	Fam13c	Fam13c	family with sequence similarity 13, member C	841.719	24		775.404	919.188	878.22	808.108	52.7707	79.1938	26.7048	40.0851	21.5435	32.3308	10.9022	16.3647	775±22	919±32	878±11	808±16	0.000680449	2663.69	76.5972	1	1	0	0	-1	0	-1	10-1
10820393	Fam151b	Fam151b	family with sequence similarity 151, member B	373.959	24		359.988	395.094	389.434	356.501	16.2908	24.5302	13.3162	14.1982	6.6507	10.0144	5.43632	5.79641	360±7	395±10	389±5	357±6	0.00165204	296.233	25.5439	1	1	0	0	-1	-1	-1	10-1
10722580	Fam189a1	Fam189a1	family with sequence similarity 189, member A1	209.114	24		199.906	226.305	217.415	203.052	8.73747	26.5806	7.42582	14.7973	3.56706	10.8515	3.03158	6.04099	200±4	226±11	217±3	203±6	0.0354127	240.966	23.0382	1	0	0	0	-1	0	-1	10-1
10777694	Fam193a	Fam193a	family with sequence similarity 193, member A	692.521	24		662.044	723.026	699.258	686.579	14.9286	19.4471	12.1603	29.8738	6.09459	7.93924	4.96441	12.1959	662±6	723±8	699±5	687±12	0.000798939	412.034	30.1257	1	1	0	0	-1	0	-1	10-1
10714890	Fas	Fas	Fas (TNF receptor superfamily, member 6)	74.3173	24		61.6769	79.8478	68.5193	68.3766	3.18678	11.2785	6.30688	5.58698	1.301	4.60443	2.57477	2.28088	62±1	80±5	69±3	68±2	0.00371347	48.1344	10.2967	1	0	0	-1	-1	0	-1	1-1-1
10853137	Fbxl13	Fbxl13	F-box and leucine-rich repeat protein 13	97.3268	24		85.9069	120.188	89.6769	101.597	6.77708	32.3934	7.60409	17.4433	2.76673	13.2245	3.10436	7.12121	86±3	120±13	90±3	102±7	0.0253659	328.286	26.8904	1	0	0	-1	0	0	-1	1-10
10730428	Fbxw4	Fbxw4	F-box and WD repeat domain containing 4	245.14	24		232.674	267.468	244.813	234.034	16.7154	31.8421	13.1638	11.6536	6.82405	12.9995	5.37409	4.75757	233±7	267±13	245±5	234±5	0.0290658	368.324	28.483	1	0	0	0	-1	0	-1	10-1
10887831	Fez2	Fez2	fasciculation and elongation protein zeta 2 (zygin II)	362.611	24		332.795	377.035	379.255	348.706	18.975	17.591	17.0101	17.1323	7.74653	7.18148	6.94433	6.99422	333±8	377±7	379±7	349±7	0.000504874	313.279	26.2686	1	1	0	0	-1	-1	-1	10-1
10860231	Fgl2	Fgl2	fibrinogen-like 2	139.101	24		118.57	141.167	140.61	127.481	9.34488	9.77655	7.80776	5.53616	3.81503	3.99126	3.1875	2.26013	119±4	141±4	141±3	127±2	0.000313508	67.211	12.1672	1	1	0	0	-1	-1	-1	10-1
10877380	Fkbp15	Fkbp15	FK506 binding protein 15	364.894	24		342.834	395.21	363.897	365.216	10.8715	25.9975	16.1996	13.439	4.43825	10.6135	6.61345	5.48645	343±4	395±11	364±7	365±5	0.00080237	289.979	25.2728	1	0	0	-1	-1	0	-1	1-1-1
10936086	Flna	Flna	filamin A, alpha	158.499	24		134.081	177.905	141.757	146.433	8.8873	34.9467	6.84	11.0262	3.62823	14.2669	2.79242	4.50143	134±4	178±14	142±3	146±5	0.0044679	322.202	26.64	1	0	0	-1	-1	0	-1	1-1-1
10782704	Flnb	Flnb	filamin B, beta	286.836	24		263.957	318.632	270.821	283.204	21.7001	24.2149	15.1594	11.5103	8.85902	9.88567	6.18881	4.69907	264±9	319±10	271±6	283±5	0.000586289	342.704	27.4745	1	0	0	-1	-1	0	-1	1-1-1
10756418	Flt1	Flt1	FMS-related tyrosine kinase 1	445.45	24		385.751	509.404	436.493	434.368	15.833	61.6403	9.84632	32.6337	6.46381	25.1646	4.01974	13.3226	386±6	509±25	436±4	434±13	0.00012733	1171.64	50.8004	1	0	0	-1	-1	0	-1	1-1-1
10764050	Fmod	Fmod	fibromodulin	73.7686	24		66.6283	92.3244	57.5968	79.5183	11.8788	14.5788	8.44454	24.542	4.8495	5.95176	3.44747	10.0192	67±5	92±6	58±3	80±10	0.0111596	259.147	23.8915	1	0	0	-1	0	0	-1	1-10
10928761	Fn1	Fn1	fibronectin 1	437.217	24	Up	299.942	585.073	337.188	339.031	7.6852	219.85	14.0675	41.8943	3.13747	89.7533	5.74304	17.1033	300±3	585±90	337±6	339±17	0.000928504	10705.1	153.556	1	0	0	-1	-1	0	-1	1-1-1
10723114	Furin	Furin	furin (paired basic amino acid cleaving enzyme)	242.395	24		228.195	266.252	233.151	234.494	5.09475	26.5192	12.5701	12.232	2.07992	10.8264	5.13174	4.99367	228±2	266±11	233±5	234±5	0.00285562	235.842	22.7919	1	0	0	-1	-1	0	-1	1-1-1
10720859	Fxyd5	Fxyd5	FXYD domain-containing ion transport regulator 5	184.015	24		127.506	194.51	165.053	149.033	10.9315	31.3893	13.4477	15.3274	4.46275	12.8146	5.48999	6.25739	128±4	195±13	165±5	149±6	9.80111e-05	348.288	27.6975	1	1	0	-1	-1	0	-1	1-1-1
10839423	Galk2	Galk2	galactokinase 2	252.811	24		240.535	267.272	256.913	242.359	7.06853	14.7693	14.3802	22.2244	2.88572	6.02956	5.87071	9.07306	241±3	267±6	257±6	242±9	0.0322554	243.47	23.1576	1	0	0	0	-1	0	-1	10-1
10761287	Gatsl2	Gatsl2	GATS protein-like 2	651.657	24		641.005	696.491	655.862	636.917	39.8532	38.0234	29.8883	19.8684	16.27	15.523	12.2019	8.11123	641±16	696±16	656±12	637±8	0.0302611	1061.31	48.3494	1	0	0	0	-1	0	-1	10-1
10819523	Gbp2	Gbp2	guanylate binding protein 2, interferon-inducible	124.161	24		95.259	153.05	119.282	104.304	7.22485	28.0174	23.5718	13.2739	2.94953	11.4381	9.62314	5.41903	95±3	153±11	119±10	104±5	0.000549755	371.58	28.6086	1	0	0	-1	-1	0	-1	1-1-1
10856394	Ggcx	Ggcx	gamma-glutamyl carboxylase	269.886	24		262.696	285.723	268.419	263.711	6.52943	18.4916	5.82879	14.264	2.66563	7.54917	2.37959	5.82324	263±3	286±8	268±2	264±6	0.0207249	145.69	17.9137	1	0	0	0	-1	0	-1	10-1
10913974	Glb1	Glb1	galactosidase, beta 1	319.918	24		273.437	344.875	291.954	313.844	14.3504	46.185	21.0911	47.6972	5.85851	18.8549	8.6104	19.4723	273±6	345±19	292±9	314±19	0.0191853	1219.01	51.8172	1	0	0	-1	0	0	-1	1-10
10798706	Gli3	Gli3	GLI family zinc finger 3	231.1	24		218.843	248.258	231.118	230.841	10.133	11.5816	5.27812	10.9947	4.13677	4.72817	2.15478	4.48858	219±4	248±5	231±2	231±4	0.000948597	94.4017	14.4198	1	0	0	-1	-1	0	-1	1-1-1
10782846	Gnpnat1	Gnpnat1	glucosamine-phosphate N-acetyltransferase 1	405.428	24		385.668	427.583	411.954	397.686	17.9064	15.7231	22.324	15.7033	7.31026	6.41894	9.11374	6.41084	386±7	428±6	412±9	398±6	0.0072864	332.465	27.061	1	0	0	0	-1	0	-1	10-1
10835303	Gpr107	Gpr107	G protein-coupled receptor 107	790.552	24		776.334	814.007	790.45	781.995	28.2587	28.6945	12.2255	11.6678	11.5366	11.7145	4.99103	4.76335	776±12	814±12	790±5	782±5	0.0473158	458.646	31.7841	1	0	0	0	-1	0	-1	10-1
10931759	Gpr108	Gpr108	G protein-coupled receptor 108	472.47	24		458.537	489.992	476.479	457.331	20.7105	9.71912	12.2134	23.3656	8.45501	3.96782	4.98609	9.53896	459±8	490±4	476±5	457±10	0.0190189	315.687	26.3693	1	0	0	0	-1	0	-1	10-1
10926698	Gpr116	Gpr116	G protein-coupled receptor 116	546.906	24		489.452	580.621	526.447	548.558	19.1774	66.7461	24.1529	20.1842	7.82914	27.249	9.86036	8.24017	489±8	581±27	526±10	549±8	0.00384807	1295.41	53.4164	1	0	1	-1	0	0	-1	1-10
10735066	Gps2	Gps2	G protein pathway suppressor 2	598.459	24		573.436	617.69	615.414	578.94	10.2364	19.4975	25.0644	25.2602	4.179	7.95982	10.2325	10.3124	573±4	618±8	615±10	579±10	0.0021413	440.844	31.1612	1	1	0	0	-1	-1	-1	10-1
10883880	Grhl1	Grhl1	grainyhead-like 1 (Drosophila)	275.756	24		257.318	301.854	288.113	260.928	16.6435	48.6231	15.9973	20.4609	6.79469	19.8503	6.53088	8.35314	257±7	302±20	288±7	261±8	0.0382434	748.141	40.5941	1	0	0	0	-1	0	-1	10-1
10776671	Grxcr1	Grxcr1	glutaredoxin, cysteine rich 1	63.001	23		47.3776	71.1314	65.7498	52.7959	8.91738	11.8526	6.65651	5.23491	3.64051	4.83879	2.71751	2.13714	47±4	71±5	66±3	53±2	0.000391879	69.3737	12.3614	1	1	0	0	-1	-1	-1	10-1
10884924	Gsta4	Gsta4	glutathione S-transferase alpha 4	271.843	24		250.263	309.46	249.479	284.234	8.89475	59.0252	18.8405	42.4395	3.63127	24.0969	7.69159	17.3259	250±4	309±24	249±8	284±17	0.0363494	1321.68	53.9552	1	0	0	-1	0	0	-1	1-10
10751354	Gtf2e1	Gtf2e1	general transcription factor IIE, polypeptide 1 (alpha subunit)	195.094	24		181.191	206.769	199.587	191.784	8.69559	10.8972	9.00229	7.32172	3.54996	4.44877	3.67517	2.98908	181±4	207±4	200±4	192±3	0.000952177	80.332	13.3019	1	1	0	0	-1	0	-1	10-1
10936537	Gtpbp4	Gtpbp4	GTP binding protein 4	499.128	24		484.482	508.773	511.325	489.951	15.3199	6.70691	12.5257	12.5446	6.25434	2.73808	5.1136	5.12132	484±6	509±3	511±5	490±5	0.00269675	153.934	18.4135	1	1	0	0	-1	-1	-1	10-1
10906455	Gxylt1	Gxylt1	glucoside xylosyltransferase 1	628.243	24		596.459	650.018	633.394	604.953	16.3848	36.3704	28.6199	25.9115	6.68907	14.8482	11.684	10.5783	596±7	650±15	633±12	605±11	0.0137382	741.371	40.41	1	0	0	0	-1	0	-1	10-1
10881824	H6pd	H6pd	hexose-6-phosphate dehydrogenase (glucose 1-dehydrogenase)	146.474	24		135.255	158.227	142.901	147.861	9.71803	11.2303	8.06844	11.0992	3.96737	4.58475	3.29393	4.53121	135±4	158±5	143±3	148±5	0.010101	100.955	14.9119	1	0	0	-1	0	0	-1	1-10
10741778	Hba-a2	Hba-a2	hemoglobin alpha, adult chain 2	2344.76	24		815.474	4579.57	798.149	1059.67	224.277	4650.97	143.269	289.005	91.5607	1898.75	58.4893	117.986	815±92	4580±1899	798±58	1060±118	0.0332726	4.84874e+06	3268.03	1	0	0	-1	-1	0	-1	1-1-1
10724315	Hbb	Hbb	hemoglobin, beta	434.695	24		183.954	704.859	173.868	205.677	19.0926	693.974	15.2544	28.4994	7.79451	283.314	6.22757	11.6348	184±8	705±283	174±6	206±12	0.0480307	107401	486.379	1	0	0	-1	-1	0	-1	1-1-1
10902648	Helb	Helb	helicase (DNA) B	213.786	24		201.392	230.716	216.83	206.936	5.73844	16.9668	2.62644	6.15871	2.34271	6.92665	1.07224	2.51428	201±2	231±7	217±1	207±3	0.000329219	85.1874	13.698	1	1	0	-1	-1	0	-1	1-1-1
10754943	Hes1	Hes1	hairy and enhancer of split 1 (Drosophila)	167.374	24		157.616	200.005	163.913	155.147	13.8627	47.1218	9.448	12.5532	5.65942	19.2374	3.85713	5.12482	158±6	200±19	164±4	155±5	0.0246064	582.999	35.8348	1	0	0	-1	-1	0	-1	1-1-1
10910490	Hexa	Hexa	hexosaminidase A	544.648	24		468.511	574.607	527.622	540.78	20.8117	29.0815	33.947	16.5762	8.49636	11.8725	13.8588	6.7672	469±8	575±12	528±14	541±7	1.62563e-05	667.602	38.3468	1	1	1	-1	0	0	-1	1-10
10886728	Hhipl1	Hhipl1	HHIP-like 1	147.816	24		145.376	162.522	144.002	148.719	6.72036	17.4811	6.88276	10.5765	2.74358	7.13664	2.80987	4.31785	145±3	163±7	144±3	149±4	0.0466947	118.124	16.1302	1	0	0	-1	0	0	-1	1-10
10715566	Hif1an	Hif1an	hypoxia-inducible factor 1, alpha subunit inhibitor	239.851	24		234.106	249.571	255.019	222.808	7.29101	8.6937	16.8257	2.60618	2.97654	3.54919	6.86905	1.06397	234±3	250±4	255±7	223±1	0.000129309	106.189	15.2936	1	1	0	0	-1	-1	-1	10-1
10761128	Hspb1	Hspb1	heat shock protein 1	114.063	24		56.1994	88.6976	74.1516	68.9623	9.11696	20.145	7.38407	8.94095	3.72198	8.22416	3.01453	3.65013	56±4	89±8	74±3	69±4	0.00244079	142.695	17.7286	1	1	0	0	-1	0	-1	10-1
10911780	Ick	Ick	intestinal cell kinase	679.134	24		653.464	703.634	686.517	664.393	25.1974	27.5942	10.7711	12.0713	10.2868	11.2653	4.39727	4.92808	653±10	704±11	687±4	664±5	0.00229277	396.261	29.5435	1	1	0	0	-1	0	-1	10-1
10806685	Ier2	Ier2	immediate early response 2	116.185	24		111.649	120.053	111.038	117.099	3.63307	3.60079	3.03502	5.30495	1.48319	1.47002	1.23904	2.16574	112±1	120±1	111±1	117±2	0.00320734	16.0331	5.94264	1	0	0	-1	0	1	-1	1-10
10834014	Ifi44l	Ifi44l	interferon-induced protein 44-like	41.0747	9		32.6303	53.3651	34.2654	38.7464	4.69278	17.4903	3.62646	10.5777	1.91582	7.1404	1.4805	4.31833	33±2	53±7	34±1	39±4	0.0144127	103.103	15.0698	1	0	0	-1	0	0	-1	1-10
10714900	Ifit2	Ifit2	interferon-induced protein with tetratricopeptide repeats 2	182.897	24		170.908	198.659	176.981	172.304	10.2943	19.5209	16.8293	16.4637	4.20264	7.96936	6.87054	6.72128	171±4	199±8	177±7	172±7	0.0377325	253.975	23.6519	1	0	0	0	-1	0	-1	10-1
10712171	Ifitm1	Ifitm1	interferon induced transmembrane protein 1	54.6131	20		37.5966	62.6571	44.9058	46.9029	3.91361	15.7386	4.93137	4.24949	1.59773	6.42524	2.01322	1.73485	38±2	63±6	45±2	47±2	0.000721321	67.3303	12.178	1	0	0	-1	-1	0	-1	1-1-1
10726679	Ifitm2	Ifitm2	interferon induced transmembrane protein 2	119.408	24		96.7167	140.317	107.914	113.64	7.50846	28.4318	8.49836	17.0173	3.06532	11.6073	3.46944	6.94729	97±3	140±12	108±3	114±7	0.00325259	280.233	24.8445	1	0	0	-1	-1	0	-1	1-1-1
10726682	Ifitm3	Ifitm3	interferon induced transmembrane protein 3	332.213	24	Up	264.713	395.867	275.323	276.042	21.693	117.559	17.9702	22.1911	8.85614	47.9934	7.3363	9.05947	265±9	396±48	275±7	276±9	0.00403685	3247.92	84.5812	1	0	0	-1	-1	0	-1	1-1-1
10758534	Ift81	Ift81	intraflagellar transport 81 homolog (Chlamydomonas)	467.01	24		442.925	502.958	466.476	457.941	12.6005	29.237	9.89313	13.6516	5.14412	11.936	4.03885	5.57323	443±5	503±12	466±4	458±6	0.000143164	296.54	25.5572	1	0	0	-1	-1	0	-1	1-1-1
10892506	IgG-2a	IgG-2a	gamma-2a immunoglobulin heavy chain	274.564	24		246.717	389.806	227.744	236.393	19.337	198.299	18.9671	10.2214	7.89431	80.9552	7.74329	4.17288	247±8	390±81	228±8	236±4	0.0318052	8498.98	136.821	1	0	0	-1	-1	0	-1	1-1-1
10750193	Il10rb	Il10rb	interleukin 10 receptor, beta	322.417	24		230.248	351.176	294.358	306.022	12.655	52.4344	22.3159	37.0401	5.16638	21.4062	9.11043	15.1216	230±5	351±21	294±9	306±15	9.84286e-05	1113.06	49.5141	1	1	1	-1	0	0	-1	1-10
10754983	Il13ra1	Il13ra1	interleukin 13 receptor, alpha 1	140.9	24		108.346	151.686	127.05	129.565	13.2772	23.924	4.71997	17.7144	5.4204	9.76694	1.92692	7.23186	108±5	152±10	127±2	130±7	0.00282072	255.328	23.7149	1	0	0	-1	0	0	-1	1-10
10786324	Il17rd	Il17rd	interleukin 17 receptor D	165.793	24		151.109	181.445	156.727	173.738	8.40666	16.135	8.9359	12.2425	3.432	6.58709	3.64807	4.99797	151±3	181±7	157±4	174±5	0.000920064	133.861	17.1711	1	0	1	-1	0	0	-1	1-10
10922826	Il1r1	Il1r1	interleukin 1 receptor, type I	115.67	24		101.122	151.263	99.0346	104.757	8.1296	44.6562	6.33259	14.9202	3.3189	18.2308	2.58527	6.09114	101±3	151±18	99±3	105±6	0.00349317	506.353	33.3962	1	0	0	-1	-1	0	-1	1-1-1
10922650	Inpp4a	Inpp4a	inositol polyphosphate-4-phosphatase, type I	852.034	24		829.969	907.604	874.929	829.558	19.7061	78.6584	35.7416	41.0136	8.04499	32.1122	14.5914	16.7437	830±8	908±32	875±15	830±17	0.0325999	2183.59	69.3515	1	0	0	0	-1	0	-1	10-1
10815076	Intu	Intu	inturned planar cell polarity effector homolog (Drosophila)	175.745	24		165.38	196.534	172.578	172.354	13.5124	21.9393	7.65061	4.61938	5.51643	8.95667	3.12335	1.88585	165±6	197±9	173±3	172±2	0.00569906	170.4	19.3734	1	0	0	-1	-1	0	-1	1-1-1
10723156	Iqgap1	Iqgap1	IQ motif containing GTPase activating protein 1	328.887	24		291.748	362.784	305.475	331.37	5.14965	65.1627	11.4158	18.2204	2.10233	26.6026	4.66049	7.43844	292±2	363±27	305±5	331±7	0.00860795	1022.57	47.4589	1	0	0	-1	0	0	-1	1-10
10821450	Itga1	Itga1	integrin, alpha 1	118.974	24		108.48	138.591	109.979	109.237	3.12836	20.4825	7.85816	11.7599	1.27715	8.36194	3.20808	4.80097	108±1	139±8	110±3	109±5	0.00131671	143.542	17.7812	1	0	0	-1	-1	0	-1	1-1-1
10850228	Jag1	Jag1	jagged 1	181.051	24		172.203	196.595	173.864	178.171	6.97691	11.0689	5.07553	9.4577	2.84831	4.51887	2.07208	3.86109	172±3	197±5	174±2	178±4	0.000455357	68.9218	12.3211	1	0	0	-1	-1	0	-1	1-1-1
10878112	Jun	Jun	jun proto-oncogene	970.566	24		919.439	1033.32	987.081	912.846	50.5344	81.1285	35.1511	73.0544	20.6306	33.1206	14.3504	29.8243	919±21	1033±33	987±14	913±30	0.0118699	3787.3	91.3346	1	0	0	0	-1	0	-1	10-1
10739543	Kctd2	Kctd2	potassium channel tetramerisation domain containing 2	326.614	24		308.77	348.075	340.096	310.863	15.3635	12.5824	12.3667	19.7255	6.27212	5.13676	5.04868	8.0529	309±6	348±5	340±5	311±8	0.000478659	238.085	22.9001	1	1	0	0	-1	-1	-1	10-1
10782658	Kctd6	Kctd6	potassium channel tetramerisation domain containing 6	397.57	24		363.979	446.368	415.599	375.432	31.2211	58.0171	55.5272	35.7223	12.746	23.6854	22.6689	14.5836	364±13	446±24	416±23	375±15	0.0294188	2112.34	68.2108	1	0	0	0	-1	0	-1	10-1
10711987	Kndc1	Kndc1	kinase non-catalytic C-lobe domain (KIND) containing 1	971.695	24		901.496	1054.13	1008.82	952.065	26.2248	112.664	30.518	55.9689	10.7062	45.9947	12.4589	22.8492	901±11	1054±46	1009±12	952±23	0.00387607	3922.65	92.9524	1	1	0	0	-1	0	-1	10-1
10830328	Lama4	Lama4	laminin, alpha 4	145.53	24		132.073	156.321	149.179	135.453	5.42048	15.4129	6.14031	9.13565	2.2129	6.29228	2.50677	3.72962	132±2	156±6	149±3	135±4	0.00113569	89.6291	14.0506	1	1	0	0	-1	0	-1	10-1
10768668	Lamc1	Lamc1	laminin, gamma 1	314.335	24		279.399	344.674	308.948	297.86	6.63292	27.2877	18.3917	10.6857	2.70788	11.1401	7.50838	4.36241	279±3	345±11	309±8	298±4	4.46499e-05	287.402	25.1603	1	1	0	-1	-1	0	-1	1-1-1
10733750	Larp1	Larp1	La ribonucleoprotein domain family, member 1	906.981	24		864.902	954.396	907.678	898.746	23.9964	51.1116	36.4829	19.6778	9.79649	20.8662	14.8941	8.03345	865±10	954±21	908±15	899±8	0.00354408	1153.67	50.4095	1	0	0	0	-1	0	-1	10-1
10810736	Lcat	Lcat	lecithin cholesterol acyltransferase	355.861	24	Up	307.934	395.463	344.232	367.396	10.8368	16.2651	36.5332	30.302	4.42412	6.64019	14.9146	12.3708	308±4	395±7	344±15	367±12	0.000184052	679.465	38.686	1	0	1	-1	0	0	-1	1-10
10819052	Lef1	Lef1	lymphoid enhancer binding factor 1	163.273	24		154.37	170.838	155.242	163.35	7.17371	10.7552	3.93138	8.66006	2.92865	4.39079	1.60498	3.53546	154±3	171±4	155±2	163±4	0.0081948	61.6984	11.6576	1	0	0	-1	0	0	-1	1-10
10719006	Leng8	Leng8	leukocyte receptor cluster (LRC) member 8	1598.06	24		1579.24	1697.05	1572.99	1569.98	66.2868	81.0749	59.7284	93.2612	27.0615	33.0987	24.384	38.0737	1579±27	1697±33	1573±24	1570±38	0.0377756	5767.78	112.713	1	0	0	-1	-1	0	-1	1-1-1
10897529	Lgals1	Lgals1	lectin, galactoside-binding, soluble, 1	311.545	24	Up	236.306	329.044	282.442	297.188	19.6328	26.8357	10.4685	28.4437	8.01506	10.9556	4.27376	11.6121	236±8	329±11	282±4	297±12	1.45163e-05	494.791	33.0128	1	1	1	-1	0	0	-1	1-10
10745292	Lgals9	Lgals9	lectin, galactoside-binding, soluble, 9	395.326	24		363.828	424.74	406.891	359.067	46.7474	53.9148	33.8668	16.0764	19.0846	22.0106	13.8261	6.56318	364±19	425±22	407±14	359±7	0.0292046	1556.89	58.5598	1	0	0	0	-1	0	-1	10-1
10750277	LOC100360017	LOC100360017	mitochondrial ribosomal protein S6-like	247.581	24		218.676	261.655	256.174	236.743	17.4996	19.6483	12.7841	8.28487	7.14417	8.02138	5.2191	3.38229	219±7	262±8	256±5	237±3	0.000400077	222.935	22.1595	1	1	0	0	-1	0	-1	10-1
10761037	LOC100360077	LOC100360077	zinc finger, HIT domain containing 1	398.522	24		388.099	423.971	402.512	391.451	14.8445	21.6027	9.94953	15.0134	6.06025	8.81926	4.06188	6.12918	388±6	424±9	403±4	391±6	0.00551304	241.604	23.0687	1	0	0	0	-1	0	-1	10-1
10878936	LOC100361234	LOC100361234	BTB (POZ) domain containing 19-like	313.925	24		302.224	332.402	318.44	305.491	17.9243	15.7411	22.0356	9.03471	7.31754	6.42626	8.99598	3.6884	302±7	332±6	318±9	305±4	0.0329887	285.973	25.0976	1	0	0	0	-1	0	-1	10-1
10906977	LOC100362634	LOC100362634	myeloid/lymphoid or mixed-lineage leukemia 2	725.106	24		680.607	779.764	742.773	714.589	24.0147	21.6873	28.8888	36.2995	9.80395	8.8538	11.7938	14.8192	681±10	780±9	743±12	715±15	0.000127698	817.156	42.4252	1	1	0	0	-1	0	-1	10-1
10734422	LOC100363013	LOC100363013	mCG140381-like	530.127	24		515.349	590.472	531.619	509.367	51.3178	46.9122	38.8251	50.8156	20.9504	19.1518	15.8503	20.7454	515±21	590±19	532±16	509±21	0.045068	2232.56	70.1249	1	0	0	0	-1	0	-1	10-1
10790658	LOC100364350	LOC100364350	NACHT and WD repeat domain containing 1-like	305.867	24		300.001	337.36	286.923	293.78	7.84655	22.8326	19.0774	29.2964	3.20334	9.32137	7.78833	11.9602	300±3	337±9	287±8	294±12	0.00480114	447.595	31.3988	1	0	0	-1	-1	0	-1	1-1-1
10833346	LOC100365935	LOC100365935	rCG22129-like	300.607	24		288.191	325.432	314.354	279.471	17.5095	24.6444	17.5938	18.7826	7.14823	10.061	7.18263	7.66795	288±7	325±10	314±7	279±8	0.0026398	382.838	29.0388	1	0	0	0	-1	-1	-1	10-1
10730895	LOC100910342	LOC100910342	BBSome-interacting protein 1-like	557.012	24		512.074	586.398	583.721	538.543	27.2284	35.6857	20.8977	15.2523	11.1159	14.5686	8.53147	6.22672	512±11	586±15	584±9	539±6	0.000140436	639.345	37.5265	1	1	0	0	-1	-1	-1	10-1
10874425	LOC246295	LOC246295	glycine-, glutamate-, thienylcyclohexylpiperidine-binding protein	561.24	24		548.828	580.844	577.444	553.907	14.3166	16.4013	17.4157	16.5743	5.84472	6.69578	7.10991	6.76641	549±6	581±7	577±7	554±7	0.00589672	262.678	24.0537	1	1	0	0	-1	0	-1	10-1
10741765	LOC287167	LOC287167	globin, alpha	50.4463	24		47.3691	56.9353	49.3056	44.1476	3.13972	11.5185	5.92474	2.27917	1.28178	4.70241	2.41876	0.930468	47±1	57±5	49±2	44±1	0.026691	41.1304	9.51815	1	0	0	0	-1	0	-1	10-1
10798624	LOC681290	LOC681290	T-cell receptor gamma chain C region 5/10-13-like	50.846	24		46.8278	56.6908	51.8843	47.4014	3.59317	10.1538	5.24027	3.44555	1.46691	4.14526	2.13933	1.40664	47±1	57±4	52±2	47±1	0.0462845	35.4532	8.83688	1	0	0	0	-1	0	-1	10-1
10862595	LOC685391	LOC685391	LRRGT00063	71.6836	24		67.1684	80.207	71.8759	68.5151	6.23518	6.87146	2.47213	6.87135	2.5455	2.80526	1.00924	2.80522	67±3	80±3	72±1	69±3	0.00785495	34.2047	8.67988	1	0	0	0	-1	0	-1	10-1
10917883	Loxl1	Loxl1	lysyl oxidase-like 1	194.212	24		179.552	230.415	178.515	189.924	12.2587	45.5478	10.8806	29.6863	5.0046	18.5948	4.44198	12.1194	180±5	230±19	179±4	190±12	0.0187917	739.374	40.3555	1	0	0	-1	-1	0	-1	1-1-1
10781441	Lpar6	Lpar6	lysophosphatidic acid receptor 6	220.693	24		178.022	238.054	208.546	206.183	10.4783	19.8196	5.83146	29.8113	4.27775	8.09133	2.38068	12.1704	178±4	238±8	209±2	206±12	0.000543359	354.412	27.9399	1	1	1	-1	-1	0	-1	1-1-1
10714136	Lpxn	Lpxn	leupaxin	85.5769	24		75.4911	89.8985	89.4118	76.6323	8.02681	7.50864	4.39452	10.895	3.27693	3.06539	1.79406	4.44786	75±3	90±3	89±2	77±4	0.00719874	65.1437	11.9786	1	1	0	0	-1	-1	-1	10-1
10903082	Lrp1	Lrp1	low density lipoprotein receptor-related protein 1	2207.51	24		2095.55	2285.43	2210.42	2185.37	31.6121	65.4428	44.5203	22.9998	12.9056	26.7169	18.1753	9.38962	2096±13	2285±27	2210±18	2185±9	7.11812e-06	1825.42	63.4091	1	1	1	-1	-1	0	-1	1-1-1
[truncated: 233 more rows]

## Sheet: Aging down, Up by FK
ID	Gene	Gene	Description	Supermean	#P	stable aging	Yng	Vect	Short	Long	Yng	Vect	Short	Long	Yng	Vect	Short	Long	Young	Aging Ctrl	Short FK	Long FK	ANOVA	MSE	LSD	Y v Age Ctrl	Y v Short	Y v Long	Age Ctrl v Short FK	Age Ctrl v Long FK	Short v Long	Combo	Pattern#
[truncated: 416 more rows]

[truncated: 1 more sheets: Unchanged with Aging]
